# Supplementary material for: Regenerative Therapy Prevents Heart Failure Progression in Dyssynchronous Nonischemic Narrow QRS Cardiomyopathy
Source: PubMed Central journal article supplement — J Am Heart Assoc. 2015 May 8;4(5):e001614. doi: 10.1161/JAHA.114.001614 (PMC4599402; doi:10.1161/jaha.114.001614), 2015-05-08
Supplement: jah30004-e001614-sd1.pdf [file jah30004-e001614-sd1.pdf]

**SUPPLEMENTAL TABLE S1 - LTQ-Orbitrap mass spectrometry data of proteins differentially expressed with or without cell therapy**

Mass spectrometry data for all proteins is listed by order of protein numbering in the manuscript in Figure 8A  
 Abbreviations: m/z = mass to charge ratio; Mr(Exp) or Mr(Calc) = nominal molecular mass, experimental or calculated; Delta = mass difference between Mr(Exp) and Mr(Calc); z = charge; Miss = number of missed tryptic cleavages; Expect = peptide-value  
 Amino acid modifications: C = carbamidomethyl cysteine; M/S = methionine sulfoxide; # = protein amino-terminal acetylation

| Spot Number | Accession # | Protein Name/Description | Protein Score | Matches | Peptide Unique | Terminal | Mass | pl  | query    | Exp. m/z        | Exp. Mr | z        | Calc. Mr | Delta | Miss  | Score      | Expect   | Before                      | Peptide Sequence | After    |        |   |       |            |  |              |   |
|-------------|-------------|--------------------------|---------------|---------|----------------|----------|------|-----|----------|-----------------|---------|----------|----------|-------|-------|------------|----------|-----------------------------|------------------|----------|--------|---|-------|------------|--|--------------|---|
| 1           | Q92111      | Serotransferrin          | 1526          | 60      | 32             | 76674    | 6.94 | 140 | 439.7412 | 877.4679        | 2       | 877.4658 | 0.0021   | 0     | 41.15 | 0.018 K    |          | DSAFGLLR                    | V                |          |        |   |       |            |  |              |   |
|             |             |                          |               |         |                |          |      | 142 | 439.7415 | 877.4684        | 2       | 877.4658 | 0.0026   | 0     | 41.52 | 0.015 K    |          | DSAFGLLR                    | V                |          |        |   |       |            |  |              |   |
|             |             |                          |               |         |                |          |      | 202 | 475.2835 | 948.5525        | 2       | 948.5505 | 0.0020   | 0     | 54.77 | 0.00023 R  |          | IPSHAVVAR                   | K                |          |        |   |       |            |  |              |   |
|             |             |                          |               |         |                |          |      | 204 | 475.2836 | 948.5527        | 2       | 948.5505 | 0.0022   | 0     | 46.26 | 0.0016 R   |          | IPSHAVVAR                   | K                |          |        |   |       |            |  |              |   |
|             |             |                          |               |         |                |          |      | 205 | 475.2837 | 948.5528        | 2       | 948.5505 | 0.0023   | 0     | 43.74 | 0.0029 R   |          | IPSHAVVAR                   | K                |          |        |   |       |            |  |              |   |
|             |             |                          |               |         |                |          |      | 221 | 482.7411 | 963.4677        | 2       | 963.4662 | 0.0016   | 0     | 43.34 | 0.0086 K   |          | DGGDGVAVFK                  | H                |          |        |   |       |            |  |              |   |
|             |             |                          |               |         |                |          |      | 222 | 482.7415 | 963.4684        | 2       | 963.4662 | 0.0022   | 0     | 81.6  | 1.30E-06 K |          | DGGDGVAVFK                  | H                |          |        |   |       |            |  |              |   |
|             |             |                          |               |         |                |          |      | 227 | 485.2749 | 968.5353        | 2       | 968.5331 | 0.0022   | 0     | 37.11 | 0.017 K    |          | GYAVAVVK                    | A                |          |        |   |       |            |  |              |   |
|             |             |                          |               |         |                |          |      | 229 | 485.2753 | 968.536         | 2       | 968.5331 | 0.0029   | 0     | 43.79 | 0.0036 K   |          | GYAVAVVK                    | A                |          |        |   |       |            |  |              |   |
|             |             |                          |               |         |                |          |      | 230 | 486.2563 | 970.498         | 2       | 970.4971 | 0.0008   | 0     | 34.33 | 0.044 K    |          | LPGETTPEK                   | A                |          |        |   |       |            |  |              |   |
|             |             |                          |               |         |                |          |      | 247 | 482.2299 | 982.4453        | 2       | 982.443  | 0.0023   | 0     | 34.26 | 0.039 K    |          | TSYPTDK                     | Y                |          |        |   |       |            |  |              |   |
|             |             |                          |               |         |                |          |      | 482 | 619.8258 | 1237.637        | 2       | 1237.634 | 0.0028   | 0     | 63.47 | 5.30E-05 K |          | DFQLFSSPLGK                 | D                |          |        |   |       |            |  |              |   |
|             |             |                          |               |         |                |          |      | 487 | 621.3104 | 1240.606        | 2       | 1240.605 | 0.0015   | 0     | 49.37 | 0.0012 K   |          | HQTVLDNTEGK                 | N                |          |        |   |       |            |  |              |   |
|             |             |                          |               |         |                |          |      | 490 | 414.5432 | 1240.608        | 2       | 1240.605 | 0.003    | 0     | 33.78 | 0.047 K    |          | HQTVLDNTEGK                 | N                |          |        |   |       |            |  |              |   |
|             |             |                          |               |         |                |          |      | 530 | 653.7602 | 1305.566        | 2       | 1305.563 | 0.0032   | 0     | 43.15 | 0.0017 K   |          | EYNGYTGAFR                  | C                |          |        |   |       |            |  |              |   |
|             |             |                          |               |         |                |          |      | 531 | 653.7908 | 1305.567        | 2       | 1305.563 | 0.0044   | 0     | 35.69 | 0.0094 K   |          | EYNGYTGAFR                  | C                |          |        |   |       |            |  |              |   |
|             |             |                          |               |         |                |          |      | 537 | 657.3595 | 1312.704        | 2       | 1312.703 | 0.0017   | 0     | 34.04 | 0.032 K    |          | HTTFEVLPEK                  | A                |          |        |   |       |            |  |              |   |
|             |             |                          |               |         |                |          |      | 540 | 657.3605 | 1312.707        | 2       | 1312.703 | 0.0038   | 0     | 36.93 | 0.017 K    |          | HTTFEVLPEK                  | A                |          |        |   |       |            |  |              |   |
|             |             |                          |               |         |                |          |      | 541 | 438.5761 | 1312.707        | 2       | 1312.703 | 0.0039   | 0     | 33.04 | 0.041 K    |          | HTTFEVLPEK                  | A                |          |        |   |       |            |  |              |   |
|             |             |                          |               |         |                |          |      | 545 | 662.2994 | 1322.584        | 2       | 1322.581 | 0.0031   | 0     | 47.63 | 0.0011 K   |          | C'DEWSISEGK                 | I                |          |        |   |       |            |  |              |   |
|             |             |                          |               |         |                |          |      | 553 | 675.34   | 1348.666        | 2       | 1348.662 | 0.0032   | 0     | 40.02 | 0.014 K    |          | GTDFQLNLEGGK                | K                |          |        |   |       |            |  |              |   |
|             |             |                          |               |         |                |          |      | 554 | 675.3403 | 1348.666        | 2       | 1348.662 | 0.0038   | 0     | 34.74 | 0.044 K    |          | GTDFQLNLEGGK                | K                |          |        |   |       |            |  |              |   |
|             |             |                          |               |         |                |          |      | 560 | 680.8027 | 1359.591        | 2       | 1359.588 | 0.0032   | 0     | 50.52 | 0.00038 K  |          | WC'AVSEHENTK                | K                |          |        |   |       |            |  |              |   |
|             |             |                          |               |         |                |          |      | 565 | 455.9007 | 1364.68         | 3       | 1364.676 | 0.0043   | 1     | 36.32 | 0.028 K    |          | C'KLDGGDGVAVFK              | H                |          |        |   |       |            |  |              |   |
|             |             |                          |               |         |                |          |      | 576 | 473.8907 | 1418.777        | 2       | 1418.767 | 0.0032   | 0     | 38.78 | 0.0093 R   |          | LYLGHNVYTAIR                | N                |          |        |   |       |            |  |              |   |
|             |             |                          |               |         |                |          |      | 580 | 473.9308 | 1418.771        | 2       | 1418.767 | 0.0035   | 0     | 47.72 | 0.0012 R   |          | LYLGHNVYTAIR                | N                |          |        |   |       |            |  |              |   |
|             |             |                          |               |         |                |          |      | 581 | 710.3928 | 1418.771        | 2       | 1418.767 | 0.0041   | 0     | 61.34 | 5.40E-05 R |          | LYLGHNVYTAIR                | N                |          |        |   |       |            |  |              |   |
|             |             |                          |               |         |                |          |      | 596 | 727.3904 | 1452.766        | 2       | 1452.761 | 0.0049   | 1     | 54.2  | 0.00029 K  |          | SKDPLFSSPLGK                | D                |          |        |   |       |            |  |              |   |
|             |             |                          |               |         |                |          |      | 605 | 739.3932 | 1476.757        | 2       | 1476.757 | 0.0046   | 0     | 55.44 | 0.00029 K  |          | KGTDFQLNLEGGK               | K                |          |        |   |       |            |  |              |   |
|             |             |                          |               |         |                |          |      | 617 | 770.361  | 1538.707        | 2       | 1538.704 | 0.0039   | 0     | 79.96 | 6.40E-07 R |          | DQYELLC'LDNTR               | K                |          |        |   |       |            |  |              |   |
|             |             |                          |               |         |                |          |      | 623 | 518.2498 | 1551.727        | 2       | 1551.724 | 0.0035   | 1     | 43.16 | 0.005 R    |          | TKC'DEWSISEGK               | I                |          |        |   |       |            |  |              |   |
|             |             |                          |               |         |                |          |      | 627 | 780.9357 | 1559.857        | 2       | 1559.853 | 0.0035   | 0     | 30.43 | 0.043 R    |          | SAGWVPIGLLFC'K              | L                |          |        |   |       |            |  |              |   |
|             |             |                          |               |         |                |          |      | 633 | 790.3583 | 1578.702        | 2       | 1578.698 | 0.0036   | 0     | 64.15 | 2.10E-05 K |          | QEDFELLC'PDGTR              | K                |          |        |   |       |            |  |              |   |
|             |             |                          |               |         |                |          |      | 649 | 809.8732 | 1617.732        | 2       | 1617.728 | 0.0039   | 0     | 68.98 | 7.50E-06 K |          | YLGAEYMQSVGNM@R             | K                |          |        |   |       |            |  |              |   |
|             |             |                          |               |         |                |          |      | 656 | 545.5829 | 1633.727        | 3       | 1633.723 | 0.004    | 0     | 39.34 | 0.0063 K   |          | YLGAEYMQSVGNM@R             | K                |          |        |   |       |            |  |              |   |
|             |             |                          |               |         |                |          |      | 657 | 817.8711 | 1633.728        | 2       | 1633.723 | 0.0048   | 0     | 72.59 | 3.10E-06 K |          | YLGAEYMQSVGNM@R             | K                |          |        |   |       |            |  |              |   |
|             |             |                          |               |         |                |          |      | 658 | 817.8713 | 1633.728        | 2       | 1633.723 | 0.0052   | 0     | 78.04 | 8.70E-07 K |          | YLGAEYMQSVGNM@R             | K                |          |        |   |       |            |  |              |   |
|             |             |                          |               |         |                |          |      | 651 | 825.8695 | 1649.722        | 2       | 1649.718 | 0.0046   | 0     | 66.17 | 3.0004 K   |          | YLGAEYMQSVGNM@R             | K                |          |        |   |       |            |  |              |   |
|             |             |                          |               |         |                |          |      | 662 | 825.8693 | 1649.724        | 2       | 1649.718 | 0.0063   | 0     | 49.07 | 0.00054 K  |          | YLGAEYMQSVGNM@R             | K                |          |        |   |       |            |  |              |   |
|             |             |                          |               |         |                |          |      | 666 | 552.9289 | 1655.765        | 3       | 1655.761 | 0.0035   | 0     | 50.24 | 0.0007 R   |          | KPVQYEDC'YLAR               | I                |          |        |   |       |            |  |              |   |
|             |             |                          |               |         |                |          |      | 668 | 552.929  | 1655.765        | 3       | 1655.761 | 0.0037   | 0     | 38.95 | 0.0093 R   |          | KPVQYEDC'YLAR               | I                |          |        |   |       |            |  |              |   |
|             |             |                          |               |         |                |          |      | 669 | 828.8906 | 1655.767        | 2       | 1655.761 | 0.0054   | 0     | 70.63 | 7.20E-06 R |          | KPVQYEDC'YLAR               | I                |          |        |   |       |            |  |              |   |
|             |             |                          |               |         |                |          |      | 711 | 558.5896 | 1780.744        | 2       | 1780.74  | 0.0049   | 0     | 50.14 | 0.00016 K  |          | FDFEFSGQC'APGYEK            | N                |          |        |   |       |            |  |              |   |
|             |             |                          |               |         |                |          |      | 712 | 891.3797 | 1780.745        | 2       | 1780.74  | 0.0045   | 0     | 61.8  | 1.20E-05 K |          | FDFEFSGQC'APGYEK            | N                |          |        |   |       |            |  |              |   |
|             |             |                          |               |         |                |          |      | 713 | 891.3797 | 1780.745        | 2       | 1780.74  | 0.0045   | 0     | 26.83 | 0.038 K    |          | FDFEFSGQC'APGYEK            | N                |          |        |   |       |            |  |              |   |
|             |             |                          |               |         |                |          |      | 720 | 605.2549 | 1812.743        | 3       | 1812.739 | 0.0037   | 0     | 41.45 | 0.00086 K  |          | IEC'ESATTEDEC'IEK           | I                |          |        |   |       |            |  |              |   |
|             |             |                          |               |         |                |          |      | 721 | 907.3791 | 1812.744        | 3       | 1812.739 | 0.0043   | 0     | 41.85 | 0.00082 K  |          | IEC'ESATTEDEC'IEK           | I                |          |        |   |       |            |  |              |   |
|             |             |                          |               |         |                |          |      | 722 | 907.3791 | 1812.744        | 3       | 1812.739 | 0.0044   | 0     | 76.01 | 3.20E-07 K |          | IEC'ESATTEDEC'IEK           | I                |          |        |   |       |            |  |              |   |
|             |             |                          |               |         |                |          |      | 723 | 907.3798 | 1812.745        | 3       | 1812.739 | 0.0058   | 0     | 34.35 | 0.0044 K   |          | IEC'ESATTEDEC'IEK           | I                |          |        |   |       |            |  |              |   |
|             |             |                          |               |         |                |          |      | 734 | 627.965  | 1880.873        | 3       | 1880.869 | 0.0046   | 1     | 31.45 | 0.042 K    |          | ADRDQYELLC'LDNTR            | K                |          |        |   |       |            |  |              |   |
|             |             |                          |               |         |                |          |      | 747 | 974.4518 | 1956.889        | 2       | 1956.885 | 0.0043   | 0     | 60.57 | 3.70E-05 R |          | NQOEGVC'PEGSINDSPVK         | W                |          |        |   |       |            |  |              |   |
|             |             |                          |               |         |                |          |      | 748 | 974.4521 | 1956.89         | 2       | 1956.885 | 0.0049   | 0     | 74.04 | 1.00E-06 K |          | NQOEGVC'PEGSINDSPVK         | W                |          |        |   |       |            |  |              |   |
|             |             |                          |               |         |                |          |      | 749 | 653.3038 | 1956.89         | 3       | 1956.885 | 0.005    | 0     | 52.08 | 0.00026 R  |          | NQOEGVC'PEGSINDSPVK         | W                |          |        |   |       |            |  |              |   |
|             |             |                          |               |         |                |          |      | 768 | 502.7517 | 2006.978        | 4       | 2006.975 | 0.0031   | 0     | 47.91 | 0.0011 K   |          | DFASC'HLAQAPNHVVSR          | K                |          |        |   |       |            |  |              |   |
|             |             |                          |               |         |                |          |      | 769 | 707.0005 | 2006.98         | 3       | 2006.975 | 0.0061   | 0     | 53.87 | 0.0003 K   |          | DFASC'HLAQAPNHVVSR          | K                |          |        |   |       |            |  |              |   |
|             |             |                          |               |         |                |          |      | 770 | 707.0008 | 2006.981        | 3       | 2006.975 | 0.0061   | 0     | 52.53 | 0.0004 K   |          | DFASC'HLAQAPNHVVSR          | K                |          |        |   |       |            |  |              |   |
|             |             |                          |               |         |                |          |      | 822 | 1115.522 | 2229.029        | 2       | 2229.024 | 0.0052   | 0     | 39.48 | 0.0048 K   |          | AVSSFFSGSC'VPC'ADPVAFFPK    | L                |          |        |   |       |            |  |              |   |
|             |             |                          |               |         |                |          |      | 893 | 1276.596 | 2551.178        | 2       | 2551.172 | 0.0055   | 0     | 59.25 | 4.70E-05 K |          | AVSSFFSGSC'VPC'ADPVAFFPK    | S                |          |        |   |       |            |  |              |   |
|             |             |                          |               |         |                |          |      | 894 | 851.4009 | 2551.181        | 3       | 2551.172 | 0.0086   | 0     | 68.69 | 5.00E-06 K |          | AVSSFFSGSC'VPC'ADPVAFFPK    | S                |          |        |   |       |            |  |              |   |
|             |             |                          |               |         |                |          |      | 901 | 914.4068 | 2740.199        | 3       | 2740.191 | 0.0079   | 0     | 37.07 | 0.00031 K  |          | LC'QLC'PGC'GC'SSTQPFYGVGAFK | C                |          |        |   |       |            |  |              |   |
|             |             |                          |               |         |                |          |      | 905 | 850.7922 | 1107.827        | 2       | 1107.827 | 0.0062   | 0     | 57.37 | 0.00026 R  |          | NTVYVDFGQIVR                | S                |          |        |   |       |            |  |              |   |
|             |             |                          |               |         |                |          |      | 902 | 737.4257 | 1472.837        | 2       | 1472.835 | 0.0018   | 0     | 80.2  | 4.30E-07 R |          | LGANSLDLVVFGR               | A                |          |        |   |       |            |  |              |   |
|             |             |                          |               |         |                |          |      | 326 | 529.2991 | 1056.584        | 2       | 1056.582 | 0.0022   | 0     | 47.76 | 0.0025 K   |          | GIIDLEER                    | T                |          |        |   |       |            |  |              |   |
|             |             |                          |               |         |                |          |      | 511 | 638.8993 | 1265.704        | 2       | 1265.702 | 0.0021   | 0     | 32.77 | 0.03 R     |          | SFTFVLSGALK                 | N                |          |        |   |       |            |  |              |   |
|             |             |                          |               |         |                |          |      | 612 | 750.8801 | 1498.746        | 2       | 1499.741 | 0.0047   | 0     | 64.8  | 3.20E-05 R |          | AIYFDGDFGQIVR               | N                |          |        |   |       |            |  |              |   |
|             |             |                          |               |         |                |          |      | 625 | 682.8217 | 1303.629        | 2       | 1303.627 | 0.0019   | 0     | 43.84 | 0.00037 K  |          | FMNBFYFNK                   | D                |          |        |   |       |            |  |              |   |
|             |             |                          |               |         |                |          |      | 626 | 780.8799 | 1559.745        | 2       | 1559.743 | 0.0025   | 0     | 50.62 | 0.00074 K  |          | ALQEGEGDLSISDR              | L                |          |        |   |       |            |  |              |   |
|             |             |                          |               |         |                |          |      | 645 | 815.9102 | 1629.806        | 2       | 1629.8   | 0.0059   | 0     | 79.71 | 1.00E-06 K |          | FNISNGGAPPEAIDK             | I                |          |        |   |       |            |  |              |   |
|             |             |                          |               |         |                |          |      | 705 | 709.3917 | 1416.769        | 2       | 1416.765 | 0.0042   | 0     | 37.79 | 0.013 K    |          | IM@EADQASVAFK               | K                |          |        |   |       |            |  |              |   |
|             |             |                          |               |         |                |          |      | 851 | 310.4006 | 1813.9          | 2       | 1813.894 | 0.0031   | 0     | 49.09 | 0.0014 R   |          | EM@EATLNLVYAGAPK            | S                |          |        |   |       |            |  |              |   |
|             |             |                          |               |         |                |          |      | 578 | 611.6406 | 1831.9          | 3       | 1831.895 | 0.0049   | 0     | 45.25 | 0.0025 R   |          | LPKAPFVSEADVDVYR            | V                |          |        |   |       |            |  |              |   |
|             |             |                          |               |         |                |          |      | 2   | Q92111   | Serotransferrin | 2143    | 90       | 33       | 76674 | 6.94  | 141        | 439.7416 | 877.4687                    | 2                | 877.4658 | 0.003  | 0 | 52.88 | 0.001 K    |  | DSAFGLLR     | V |
|             |             |                          |               |         |                |          |      |     |          |                 |         |          |          |       |       | 202        | 475.2829 | 948.5513                    | 2                | 948.5505 | 0.0008 | 0 | 46.79 | 0.00088 R  |  | IPSHAVVAR    | K |
|             |             |                          |               |         |                |          |      |     |          |                 |         |          |          |       |       | 203        | 475.2829 | 948.5515                    | 2                | 948.5505 | 0.0008 | 0 | 43.47 | 0.003 K    |  | IPSHAVVAR    | K |
|             |             |                          |               |         |                |          |      |     |          |                 |         |          |          |       |       | 205        | 475.2831 | 948.5517                    | 2                | 948.5505 | 0.0012 | 0 | 46.54 | 0.0015 R   |  | IPSHAVVAR    | K |
|             |             |                          |               |         |                |          |      |     |          |                 |         |          |          |       |       | 224        | 482.7411 | 963.4676                    | 2                | 963.4662 | 0.0014 | 0 | 63.56 | 8.20E-05 K |  | DGGDGVAVFK   | H |
|             |             |                          |               |         |                |          |      |     |          |                 |         |          |          |       |       | 225        | 482.7414 | 963.4682                    | 2                | 963.4662 | 0.002  | 0 | 82.01 | 1.20E-06 K |  | DGGDGVAVFK   | H |
|             |             |                          |               |         |                |          |      |     |          |                 |         |          |          |       |       | 226        | 482.7417 | 963.4689                    | 2                | 963.4662 | 0.0027 | 0 | 73.94 | 7.30E-06 K |  | DGGDGVAVFK   | H |
|             |             |                          |               |         |                |          |      |     |          |                 |         |          |          |       |       | 233        | 485.275  | 968.5354                    | 2                | 968.5331 | 0.0023 | 0 | 44.73 | 0.0029 K   |  | GYAVAVVK     | A |
|             |             |                          |               |         |                |          |      |     |          |                 |         |          |          |       |       | 236        | 486.2558 | 970.4971                    | 2                | 970.4971 | 0      | 0 | 43.06 | 0.0065 K   |  | LPGETTPEK    | Y |
|             |             |                          |               |         |                |          |      |     |          |                 |         |          |          |       |       | 254        | 492.2295 | 982.4444                    | 2                | 982.443  | 0.0014 | 0 | 34.21 | 0.039 K    |  | TSYPTDK      | Y |
|             |             |                          |               |         |                |          |      |     |          |                 |         |          |          |       |       | 401        | 598.7885 | 1171.562                    | 2                | 1171.559 | 0.0033 | 0 | 47.69 | 0.0028 R   |  | LLEACT'FHK   | H |
|             |             |                          |               |         |                |          |      |     |          |                 |         |          |          |       |       | 464        | 586.2892 | 1170.564                    | 2                | 1170.56  | 0.0035 | 0 | 50.14 | 0.00037 K  |  | WC'AVSEHENTK | K |
|             |             |                          |               |         |                |          |      |     |          |                 |         |          |          |       |       | 528        | 619.8259 | 1237.637                    | 2                | 1237.634 | 0.0029 | 0 | 39.69 | 0.012 K    |  | DFQLFSSPLGK  | D |
|             |             |                          |               |         |                |          |      |     |          |                 |         |          |          |       |       | 529        | 619.8264 | 1237.638                    | 2                | 1237.634 | 0.004  | 0 | 61.41 | 7.90E-05 K |  | DFQLFSSPLGK  | D |
|             |             |                          |               |         |                |          |      |     |          |                 |         |          |          |       |       | 533        | 621.3099 | 1240.605                    | 2                | 1240.605 | 0.0004 | 0 | 64.68 | 3.30E-05 K |  | HQTVLDNTEGK  | N |
|             |             |                          |               |         |                |          |      |     |          |                 |         |          |          |       |       | 534        | 621.3102 | 1240.606                    | 2                | 1240.605 | 0.001  | 0 | 52.76 | 0.00082 K  |  | HQTVLDNTEGK  | N |
|             |             |                          |               |         |                |          |      |     |          |                 |         |          |          |       |       | 536        | 621.3105 | 1240.606                    | 2                | 1240.605 | 0.0016 | 0 | 43.48 | 0.0048 K   |  | HQTVLDNTEGK  | N |
|             |             |                          |               |         |                |          |      |     |          |                 |         |          |          |       |       | 538        | 621.3113 | 1240.608                    | 2                | 1240.605 | 0.0    |   |       |            |  |              |   |







|        |                                        |                                    |      |     |       |       |          |          |          |          |          |          |        |          |          |                                       |                                              |          |   |
|--------|----------------------------------------|------------------------------------|------|-----|-------|-------|----------|----------|----------|----------|----------|----------|--------|----------|----------|---------------------------------------|----------------------------------------------|----------|---|
|        |                                        |                                    |      |     |       | 1282  | 931.4091 | 1860.804 | 2        | 1860.798 | 0.0053   | 0        | 78.29  | 4.10E-07 | R        | VGLIGSC*TNSSYEDM@GR                   | S                                            |          |   |
|        |                                        |                                    |      |     |       | 1283  | 931.4094 | 1860.804 | 2        | 1860.798 | 0.0061   | 0        | 104.4  | 1.00E-09 | R        | VGLIGSC*TNSSYEDM@GR                   | S                                            |          |   |
|        |                                        |                                    |      |     |       | 1284  | 931.4095 | 1860.805 | 2        | 1860.798 | 0.0063   | 0        | 71.91  | 1.80E-06 | R        | VGLIGSC*TNSSYEDM@GR                   | S                                            |          |   |
|        |                                        |                                    |      |     |       | 1286  | 623.6421 | 1867.904 | 3        | 1867.906 | -0.002   | 0        | 50.39  | 0.00062  | K        | IVYGHLDPPANDEIER                      | G                                            |          |   |
|        |                                        |                                    |      |     |       | 1287  | 623.644  | 1867.91  | 3        | 1867.906 | 0.0037   | 0        | 52.31  | 0.00044  | K        | IVYGHLDPPANDEIER                      | G                                            |          |   |
|        |                                        |                                    |      |     |       | 1288  | 934.9628 | 1867.911 | 2        | 1867.906 | 0.0046   | 0        | 40.78  | 0.0059   | K        | IVYGHLDPPANDEIER                      | G                                            |          |   |
|        |                                        |                                    |      |     |       | 1289  | 623.645  | 1867.913 | 3        | 1867.906 | 0.0068   | 0        | 40.04  | 0.0078   | K        | IVYGHLDPPANDEIER                      | G                                            |          |   |
|        |                                        |                                    |      |     |       | 1323  | 636.3365 | 1905.988 | 3        | 1905.984 | 0.004    | 1        | 48.18  | 0.00095  | K        | KOGLPLTFADPSDYNK                      | I                                            |          |   |
|        |                                        |                                    |      |     |       | 1325  | 636.3367 | 1905.988 | 3        | 1905.984 | 0.0048   | 1        | 35.23  | 0.019    | K        | KOGLPLTFADPSDYNK                      | I                                            |          |   |
|        |                                        |                                    |      |     |       | 1326  | 954.0021 | 1905.99  | 2        | 1905.984 | 0.0061   | 1        | 70.98  | 5.10E-06 | K        | KOGLPLTFADPSDYNK                      | I                                            |          |   |
|        |                                        |                                    |      |     |       | 1353  | 651.6758 | 1952.006 | 3        | 1952     | 0.0054   | 1        | 40.85  | 0.0057   | R        | AKDINQEVYNFLATAGAK                    | Y                                            |          |   |
|        |                                        |                                    |      |     |       | 1354  | 977.0104 | 1952.006 | 2        | 1952     | 0.006    | 1        | 101.85 | 4.50E-09 | R        | AKDINQEVYNFLATAGAK                    | Y                                            |          |   |
|        |                                        |                                    |      |     |       | 1355  | 651.6763 | 1952.007 | 3        | 1952     | 0.0069   | 1        | 51.01  | 0.00055  | R        | AKDINQEVYNFLATAGAK                    | Y                                            |          |   |
|        |                                        |                                    |      |     |       | 1427  | 720.0125 | 2157.016 | 3        | 2157.011 | 0.0081   | 0        | 81.66  | 4.10E-07 | R        | GKGLDNISNLLIGAINENK                   | A                                            |          |   |
|        |                                        |                                    |      |     |       | 1485  | 740.3997 | 2218.177 | 3        | 2218.171 | 0.0066   | 0        | 43     | 0.0017   | R        | GKGLDNISNLLIGAINENK                   | A                                            |          |   |
|        |                                        |                                    |      |     |       | 1487  | 740.3997 | 2218.177 | 3        | 2218.171 | 0.0068   | 0        | 51.69  | 0.00023  | R        | GKGLDNISNLLIGAINENK                   | A                                            |          |   |
|        |                                        |                                    |      |     |       | 1490  | 740.4    | 2218.178 | 3        | 2218.171 | 0.0077   | 0        | 47.33  | 0.00059  | R        | GKGLDNISNLLIGAINENK                   | A                                            |          |   |
|        |                                        |                                    |      |     |       | 1493  | 555.5519 | 2218.179 | 2        | 2218.171 | 0.0081   | 0        | 44.75  | 0.0011   | R        | GKGLDNISNLLIGAINENK                   | A                                            |          |   |
|        |                                        |                                    |      |     |       | 1495  | 1110.097 | 2218.179 | 2        | 2218.171 | 0.0085   | 0        | 117.61 | 5.50E-11 | R        | GKGLDNISNLLIGAINENK                   | A                                            |          |   |
|        |                                        |                                    |      |     |       | 1551  | 1130.575 | 2259.136 | 2        | 2259.132 | 0.0045   | 0        | 73.22  | 2.70E-06 | K        | VAVPSTIHC*DHLEAQVGGEK                 | D                                            |          |   |
|        |                                        |                                    |      |     |       | 1554  | 754.0531 | 2259.138 | 3        | 2259.132 | 0.0057   | 0        | 49.4   | 0.00069  | K        | VAVPSTIHC*DHLEAQVGGEK                 | D                                            |          |   |
|        |                                        |                                    |      |     |       | 1555  | 754.0535 | 2259.139 | 3        | 2259.132 | 0.0062   | 0        | 32.43  | 0.033    | K        | VAVPSTIHC*DHLEAQVGGEK                 | D                                            |          |   |
|        |                                        |                                    |      |     |       | 1596  | 762.7112 | 2325.112 | 2        | 2325.105 | 0.0078   | 1        | 69.23  | 6.70E-06 | R        | DVWGVLNANAG*GPC*IGQWDR                | K                                            |          |   |
|        |                                        |                                    |      |     |       | 1636  | 1169.587 | 2337.159 | 2        | 2337.153 | 0.006    | 0        | 100.98 | 4.10E-09 | R        | VAMQDATAQAMAMLOFISGLPK                | V                                            |          |   |
|        |                                        |                                    |      |     |       | 1637  | 1169.587 | 2337.16  | 2        | 2337.153 | 0.0072   | 0        | 103.58 | 2.20E-09 | R        | VAMQDATAQAMAMLOFISGLPK                | V                                            |          |   |
|        |                                        |                                    |      |     |       | 1647  | 1177.584 | 2353.154 | 2        | 2353.148 | 0.0057   | 0        | 34.55  | 0.019    | R        | VAM@QDATAQAMAMLOFISGLPK               | V                                            |          |   |
|        |                                        |                                    |      |     |       | 1648  | 1177.584 | 2353.154 | 2        | 2353.148 | 0.0061   | 0        | 78.34  | 7.60E-07 | R        | VAM@QDATAQAMAMLOFISGLPK               | V                                            |          |   |
|        |                                        |                                    |      |     |       | 1650  | 1177.585 | 2353.155 | 2        | 2353.148 | 0.0069   | 0        | 79.8   | 5.50E-07 | R        | VAM@QDATAQAMAMLOFISGLPK               | V                                            |          |   |
|        |                                        |                                    |      |     |       | 1652  | 785.393  | 2353.157 | 3        | 2353.148 | 0.0092   | 0        | 66.81  | 1.10E-05 | R        | VAM@QDATAQAMAMLOFISGLPK               | V                                            |          |   |
|        |                                        |                                    |      |     |       | 1660  | 788.0183 | 2361.033 | 3        | 2361.026 | 0.0073   | 1        | 40.38  | 0.0024   | R        | SDFDPGQDYGHPKPKDSSGGR                 | V                                            |          |   |
|        |                                        |                                    |      |     |       | 1667  | 1185.581 | 2369.147 | 2        | 2369.143 | 0.0044   | 0        | 76.85  | 1.10E-06 | R        | VAMQDATAQAM@AM@LOFISGLPK              | V                                            |          |   |
|        |                                        |                                    |      |     |       | 1669  | 1185.582 | 2369.15  | 2        | 2369.143 | 0.0046   | 0        | 76.85  | 1.10E-06 | R        | VAMQDATAQAM@AM@LOFISGLPK              | V                                            |          |   |
|        |                                        |                                    |      |     |       | 1672  | 790.724  | 2369.15  | 3        | 2369.143 | 0.0073   | 0        | 60.05  | 5.70E-05 | R        | VAMQDATAQAM@AM@LOFISGLPK              | V                                            |          |   |
|        |                                        |                                    |      |     |       | 1673  | 790.724  | 2369.15  | 3        | 2369.143 | 0.0073   | 0        | 59.99  | 5.70E-05 | R        | VAMQDATAQAM@AM@LOFISGLPK              | V                                            |          |   |
|        |                                        |                                    |      |     |       | 1675  | 1185.583 | 2369.151 | 2        | 2369.143 | 0.0078   | 0        | 81.62  | 3.90E-07 | R        | VAMQDATAQAM@AM@LOFISGLPK              | V                                            |          |   |
|        |                                        |                                    |      |     |       | 1676  | 1185.583 | 2369.151 | 2        | 2369.143 | 0.0081   | 0        | 47.53  | 0.00097  | R        | VAMQDATAQAM@AM@LOFISGLPK              | V                                            |          |   |
|        |                                        |                                    |      |     |       | 1677  | 790.724  | 2369.151 | 3        | 2369.143 | 0.0083   | 0        | 42.8   | 0.0029   | R        | VAMQDATAQAM@AM@LOFISGLPK              | V                                            |          |   |
|        |                                        |                                    |      |     |       | 1688  | 1193.58  | 2385.145 | 2        | 2385.138 | 0.0073   | 0        | 119.34 | 5.60E-11 | R        | VAM@QDATAQAM@AM@LOFISGLPK             | V                                            |          |   |
|        |                                        |                                    |      |     |       | 1691  | 796.0563 | 2385.147 | 3        | 2385.138 | 0.0092   | 0        | 66.17  | 1.20E-05 | R        | VAM@QDATAQAM@AM@LOFISGLPK             | V                                            |          |   |
|        |                                        |                                    |      |     |       | 1790  | 927.4897 | 2779.447 | 3        | 2779.439 | 0.0082   | 0        | 54.12  | 9.60E-05 | R        | NDANPETHAFVTSPEITVLAIAAGTLK           | F                                            |          |   |
|        |                                        |                                    |      |     |       | 1792  | 927.4901 | 2779.449 | 3        | 2779.439 | 0.0093   | 0        | 60.87  | 2.10E-05 | R        | NDANPETHAFVTSPEITVLAIAAGTLK           | F                                            |          |   |
|        |                                        |                                    |      |     |       | 1793  | 927.4902 | 2779.449 | 3        | 2779.439 | 0.0095   | 0        | 40.57  | 0.0023   | R        | NDANPETHAFVTSPEITVLAIAAGTLK           | F                                            |          |   |
|        |                                        |                                    |      |     |       | 1799  | 927.819  | 2780.435 | 3        | 2779.439 | 0.0091   | 0        | 46.89  | 0.00073  | R        | NDANPETHAFVTSPEITVLAIAAGTLK           | F                                            |          |   |
|        |                                        |                                    |      |     |       | 1844  | 975.8171 | 2924.429 | 3        | 2924.421 | 0.0089   | 1        | 44.83  | 0.0012   | K        | HPNQTOETLLNHTFNETOIEVFR               | A                                            |          |   |
|        |                                        |                                    |      |     |       | 1914  | 1008.269 | 4029.046 | 4        | 4029.037 | 0.0087   | 1        | 71.56  | 9.40E-07 | R        | NDANPETHAFVTSPEITVLAIAAGTLKFNPEFDLTGK | A                                            |          |   |
|        |                                        |                                    |      |     |       | 4929  | 1147.772 | 4587.06  | 4        | 4587.056 | 0.0034   | 0        | 43.02  | 0.00047  | R        | NDANPETHAFVTSPEITVLAIAAGTLKFNPEFDLTGK | A                                            |          |   |
| Q92111 | Serotransferrin                        | 120                                | 3    | 3   | 76674 | 6.94  | 216      | 482.7415 | 963.4685 | 2        | 963.4662 | 0.0023   | 0      | 63.69    | 7.80E-05 | K                                     | DGGDGVAVFK                                   | N        |   |
|        |                                        |                                    |      |     |       |       | 801      | 473.9307 | 1418.77  | 3        | 1418.767 | 0.0033   | 0      | 41.26    | 0.0054   | R                                     | LYLGHNYVTAIR                                 | H        |   |
|        |                                        |                                    |      |     |       |       | 1243     | 907.3793 | 1812.744 | 2        | 1812.739 | 0.0047   | 0      | 56.15    | 3.10E-05 | K                                     | IEC*ESATETEDC*IEK                            | I        |   |
| Q8BMS1 | Trifunctional enzyme subunit alpha, mi | 82                                 | 2    | 2   | 82617 | 9.24  | 1027     | 1024.102 | 2046.189 | 2        | 2046.184 | 0.0056   | 0      | 56.83    | 7.70E-06 | K                                     | ADMI@EVHFGPQVDSIS*GTM@ATCNM@GAEIGATTSVFPYNNR | L        |   |
|        |                                        |                                    |      |     |       |       | 24       | 386.752  | 771.4894 | 2        | 771.4854 | 0.004    | 0      | 73.51    | 0.0044   | K                                     | LTIQGLK                                      | D        |   |
| 7      | Q99K10                                 | Aconitate hydratase, mitochondrial | 4821 | 147 | 44    | 85410 | 8.08     | 45       | 600.767  | 795.5198 | 2        | 795.5167 | 0.0027 | 0        | 34.68    | 0.026                                 | K                                            | VAGILTVK | D |
|        |                                        |                                    |      |     |       |       | 182      | 461.7417 | 921.4689 | 2        | 921.4668 | 0.0021   | 0      | 42.3     | 0.012    | R                                     | EHAALEPR                                     | H        |   |
|        |                                        |                                    |      |     |       |       | 183      | 461.7419 | 921.4693 | 2        | 921.4668 | 0.0025   | 0      | 41.59    | 0.013    | R                                     | EHAALEPR                                     | H        |   |
|        |                                        |                                    |      |     |       |       | 184      | 461.7423 | 921.4701 | 2        | 921.4668 | 0.0033   | 0      | 56.32    | 0.0004   | R                                     | EHAALEPR                                     | H        |   |
|        |                                        |                                    |      |     |       |       | 192      | 468.2521 | 934.4896 | 2        | 934.4872 | 0.0021   | 0      | 54.91    | 0.0049   | R                                     | DGYAQILR                                     | D        |   |
|        |                                        |                                    |      |     |       |       | 193      | 468.2523 | 934.4901 | 2        | 934.4872 | 0.0029   | 0      | 48.68    | 0.0028   | R                                     | DGYAQILR                                     | D        |   |
|        |                                        |                                    |      |     |       |       | 194      | 468.2525 | 934.4905 | 2        | 934.4872 | 0.0032   | 0      | 57.88    | 0.00033  | R                                     | DGYAQILR                                     | D        |   |
|        |                                        |                                    |      |     |       |       | 195      | 468.2527 | 934.4909 | 2        | 934.4872 | 0.0037   | 0      | 45.02    | 0.0061   | R                                     | DGYAQILR                                     | D        |   |
|        |                                        |                                    |      |     |       |       | 245      | 493.2601 | 984.5057 | 2        | 984.5029 | 0.0028   | 0      | 56.09    | 0.00027  | K                                     | EGWPLDIR                                     | V        |   |
|        |                                        |                                    |      |     |       |       | 246      | 493.2603 | 984.5061 | 2        | 984.5029 | 0.0032   | 0      | 45.9     | 0.0027   | R                                     | EGWPLDIR                                     | V        |   |
|        |                                        |                                    |      |     |       |       | 249      | 494.7577 | 987.5008 | 2        | 987.4985 | 0.0022   | 0      | 39.82    | 0.018    | R                                     | VDVSPTSQR                                    | L        |   |
|        |                                        |                                    |      |     |       |       | 250      | 494.7577 | 987.5008 | 2        | 987.4985 | 0.0023   | 0      | 39.93    | 0.018    | R                                     | VDVSPTSQR                                    | L        |   |
|        |                                        |                                    |      |     |       |       | 253      | 494.7579 | 987.5012 | 2        | 987.4985 | 0.0027   | 0      | 51.28    | 0.0013   | R                                     | VDVSPTSQR                                    | L        |   |
|        |                                        |                                    |      |     |       |       | 254      | 494.7579 | 987.5012 | 2        | 987.4985 | 0.0027   | 0      | 36.22    | 0.042    | R                                     | VDVSPTSQR                                    | L        |   |
|        |                                        |                                    |      |     |       |       | 365      | 534.2778 | 1066.541 | 2        | 1066.541 | 0.0004   | 0      | 49.51    | 0.0014   | K                                     | NTIVTSYNR                                    | N        |   |
|        |                                        |                                    |      |     |       |       | 367      | 534.2787 | 1066.543 | 2        | 1066.541 | 0.0022   | 0      | 50.6     | 0.0012   | K                                     | NTIVTSYNR                                    | N        |   |
|        |                                        |                                    |      |     |       |       | 369      | 534.2789 | 1066.543 | 2        | 1066.541 | 0.0025   | 0      | 36.27    | 0.034    | K                                     | NTIVTSYNR                                    | N        |   |
|        |                                        |                                    |      |     |       |       | 370      | 534.279  | 1066.543 | 2        | 1066.541 | 0.0027   | 0      | 51.33    | 0.0011   | K                                     | NTIVTSYNR                                    | N        |   |
|        |                                        |                                    |      |     |       |       | 407      | 551.8119 | 1101.605 | 1        | 1101.607 | 0.0021   | 0      | 36.53    | 0.029    | K                                     | LNRPILTSEK                                   | I        |   |
|        |                                        |                                    |      |     |       |       | 408      | 551.8122 | 1101.61  | 1        | 1101.607 | 0.0028   | 0      | 54.14    | 0.00051  | R                                     | LNRPILTSEK                                   | I        |   |
|        |                                        |                                    |      |     |       |       | 491      | 585.8461 | 1169.678 | 2        | 1169.677 | 0.0009   | 0      | 33.86    | 0.019    | R                                     | LNRPILTSEK                                   | I        |   |
|        |                                        |                                    |      |     |       |       | 492      | 585.8462 | 1169.678 | 2        | 1169.677 | 0.001    | 0      | 40.09    | 0.0046   | R                                     | LNRPILTSEK                                   | I        |   |
|        |                                        |                                    |      |     |       |       | 493      | 585.8467 | 1169.679 | 2        | 1169.677 | 0.0021   | 0      | 40.53    | 0.0049   | R                                     | LNRPILTSEK                                   | I        |   |
|        |                                        |                                    |      |     |       |       | 494      | 585.8469 | 1169.679 | 2        | 1169.677 | 0.0024   | 0      | 38.81    | 0.0073   | R                                     | LNRPILTSEK                                   | I        |   |
|        |                                        |                                    |      |     |       |       | 527      | 600.3499 | 1198.685 | 2        | 1198.681 | 0.0043   | 0      | 51.24    | 0.00048  | K                                     | DLEDLQILK                                    | V        |   |
|        |                                        |                                    |      |     |       |       | 528      | 600.35   | 1198.686 | 2        | 1198.681 | 0.0046   | 0      | 69.67    | 7.00E-06 | K                                     | DLEDLQILK                                    | V        |   |
|        |                                        |                                    |      |     |       |       | 529      | 600.3503 | 1198.686 | 2        | 1198.681 | 0.0053   | 0      | 32.19    | 0.039    | K                                     | DLEDLQILK                                    | V        |   |
|        |                                        |                                    |      |     |       |       | 559      | 613.3073 | 1224.612 | 2        | 1224.599 | 0.0015   | 0      | 85.65    | 3.20E-07 | R                                     | LEAPDADELPR                                  | S        |   |
|        |                                        |                                    |      |     |       |       | 560      | 613.3078 | 1224.601 | 2        | 1224.599 | 0.0024   | 0      | 47.04    | 0.0024   | K                                     | LEAPDADELPR                                  | S        |   |
|        |                                        |                                    |      |     |       |       | 561      | 613.308  | 1224.601 | 2        | 1224.599 | 0.0028   | 0      | 76.76    | 2.70E-06 | K                                     | LEAPDADELPR                                  | S        |   |
|        |                                        |                                    |      |     |       |       | 562      | 613.308  | 1224.601 | 2        | 1224.599 | 0.0028   | 0      | 68.18    | 6.70E-05 | K                                     | LEAPDADELPR                                  | S        |   |
|        |                                        |                                    |      |     |       |       | 564      | 613.3102 | 1224.606 | 2        | 1224.599 | 0.0072   | 0      | 48.13    | 0.0019   | K                                     | LEAPDADELPR                                  | S        |   |
|        |                                        |                                    |      |     |       |       | 571      | 617.3297 | 1232.643 | 2        |          |          |        |          |          |                                       |                                              |          |   |



|        |                    |     |    |    |       |      |           |          |         |          |          |        |        |          |        |                                |           |   |
|--------|--------------------|-----|----|----|-------|------|-----------|----------|---------|----------|----------|--------|--------|----------|--------|--------------------------------|-----------|---|
|        |                    |     |    |    |       | 514  | 693.3609  | 1384.707 | 2       | 1384.702 | 0.0052   | 0      | 45.71  | 0.0024   | R      | IMNVGEPIDER                    | G         |   |
|        |                    |     |    |    |       | 518  | 701.3583  | 1400.702 | 2       | 1400.697 | 0.0051   | 0      | 46.4   | 0.0022   | R      | IMNVGEPIDER                    | G         |   |
|        |                    |     |    |    |       | 532  | 718.3833  | 1434.752 | 2       | 1434.747 | 0.0054   | 0      | 77.46  | 1.70E-06 | R      | FTQAGSEVALGR                   | I         |   |
|        |                    |     |    |    |       | 536  | 720.4007  | 1438.787 | 2       | 1438.782 | 0.0048   | 0      | 95.91  | 1.80E-08 | R      | VALTGLTYVEYFR                  | D         |   |
|        |                    |     |    |    |       | 550  | 737.4237  | 1472.833 | 2       | 1472.827 | 0.0056   | 0      | 75.51  | 1.20E-06 | K      | VALVLELNWAK                    | A         |   |
|        |                    |     |    |    |       | 582  | 801.4117  | 1600.809 | 2       | 1600.803 | 0.0057   | 0      | 38.3   | 0.013    | K      | VALVYQGMNEPFGAR                | A         |   |
|        |                    |     |    |    |       | 602  | 550.9793  | 1649.916 | 3       | 1649.91  | 0.006    | 0      | 33.64  | 0.014    | R      | LVLEVAQHLGESTVR                | T         |   |
|        |                    |     |    |    |       | 603  | 825.9857  | 1649.917 | 2       | 1649.91  | 0.0068   | 0      | 79.09  | 3.90E-07 | R      | LVLEVAQHLGESTVR                | T         |   |
|        |                    |     |    |    |       | 716  | 530.3726  | 1918.086 | 3       | 1918.089 | 0.0071   | 0      | 45.52  | 0.0026   | K      | VLDSGPKPIVPELTLGR              | F         |   |
|        |                    |     |    |    |       | 718  | 961.4855  | 1920.956 | 2       | 1920.958 | -0.0018  | 0      | 55.22  | 0.00022  | R      | DOEGDDVLLDFINFR                | I         |   |
|        |                    |     |    |    |       | 749  | 663.3511  | 1987.031 | 3       | 1987.026 | 0.0052   | 0      | 33.33  | 0.025    | R      | AIAGLGYPAVDPLDSTR              | I         |   |
|        |                    |     |    |    |       | 750  | 994.5244  | 1987.034 | 2       | 1987.026 | 0.008    | 0      | 43.1   | 0.0028   | R      | AIAGLGYPAVDPLDSTR              | I         |   |
|        |                    |     |    |    |       | 876  | 676.6993  | 2297.073 | 2       | 2297.067 | 0.0092   | 0      | 50.2   | 0.00052  | R      | IFSAVGYOPLATDMGIGTMQER         | I         |   |
|        |                    |     |    |    |       | 915  | 1238.9897 | 3713.886 | 3       | 3713.879 | 0.0058   | 0      | 39.33  | 0.0021   | R      | GSTIATGAVPADDLTPAPFAHLDATTLSLR | A         |   |
| Q99KJ8 | Dynactin subunit 2 | 499 | 12 | 10 | 44090 | 5.14 | 240       | 514.8224 | 1027.63 | 2        | 1027.628 | 0.0026 | 0      | 43.03    | 0.0029 | R                              | LLLOLEATK | I |
|        |                    |     |    |    |       | 244  | 516.2914  | 1030.568 | 2       | 1030.566 | 0.0024   | 0      | 69.72  | 1.90E-05 | R      | LTELEATVR                      | S         |   |
|        |                    |     |    |    |       | 406  | 592.8739  | 1183.732 | 2       | 1183.729 | 0.0036   | 1      | 49.11  | 0.00025  | K      | RLLLOLEATK                     | C         |   |
|        |                    |     |    |    |       | 574  | 791.9351  | 1591.856 | 2       | 1591.852 | 0.0041   | 0      | 51.09  | 0.0004   | R      | WSPRTLPPELVGR                  | I         |   |
|        |                    |     |    |    |       | 577  | 796.4121  | 1590.81  | 2       | 1590.804 | 0.0061   | 0      | 66.65  | 2.70E-05 | K      | DNTALLTVQVTMR                  | E         |   |
|        |                    |     |    |    |       | 579  | 533.6314  | 1597.872 | 3       | 1597.868 | 0.0049   | 0      | 54.81  | 0.00017  | K      | VSALLDLAVDVEAR                 | L         |   |
|        |                    |     |    |    |       | 580  | 799.9444  | 1597.874 | 2       | 1597.868 | 0.0067   | 0      | 66.72  | 1.20E-05 | K      | VSALLDLAVDVEAR                 | L         |   |
|        |                    |     |    |    |       | 586  | 804.4093  | 1606.804 | 2       | 1606.799 | 0.0056   | 0      | 87.93  | 1.70E-07 | R      | DNTALLTVQVTMR                  | E         |   |
|        |                    |     |    |    |       | 610  | 834.4493  | 1686.884 | 2       | 1686.878 | 0.0064   | 0      | 57.23  | 9.40E-05 | R      | LLHEVLELVEYK                   | R         |   |
|        |                    |     |    |    |       | 692  | 918.002   | 1833.99  | 2       | 1833.984 | 0.0059   | 0      | 52.31  | 0.00027  | K      | LLGPDAINADPDLGALK              | I         |   |
|        |                    |     |    |    |       | 711  | 952.9365  | 1903.859 | 2       | 1903.851 | 0.0075   | 0      | 89.52  | 4.90E-08 | R      | TGYESGDYEMLEGGELGVK            | R         |   |
|        |                    |     |    |    |       | 717  | 960.9335  | 1919.852 | 2       | 1919.846 | 0.0065   | 0      | 75.76  | 1.40E-06 | R      | TGYESGDYEMLEGGELGVK            | R         |   |
|        |                    |     |    |    |       | 259  | 628.0221  | 1043.55  | 2       | 1043.536 | 0.0033   | 0      | 34.94  | 0.05     | R      | QYVLEK                         | E         |   |
|        |                    |     |    |    |       | 297  | 536.7495  | 1071.485 | 2       | 1071.481 | 0.0037   | 0      | 49.97  | 0.00061  | R      | C'YOLEFGR                      | K         |   |
|        |                    |     |    |    |       | 312  | 546.2715  | 1090.528 | 2       | 1090.526 | 0.0029   | 0      | 88.79  | 2.20E-07 | K      | GAGTDDTLVR                     | I         |   |
|        |                    |     |    |    |       | 342  | 558.8277  | 1115.641 | 2       | 1115.637 | 0.0036   | 0      | 56.45  | 0.0002   | R      | VLIEILCTR                      | T         |   |
|        |                    |     |    |    |       | 594  | 817.3794  | 1632.736 | 2       | 1632.73  | 0.0062   | 0      | 60.37  | 4.90E-05 | K      | TLSTMIIASDTSGDYR               | K         |   |
|        |                    |     |    |    |       | 598  | 547.8025  | 1640.74  | 3       | 1640.733 | 0.0071   | 0      | 34.27  | 0.021    | R      | QYVLEK                         | K         |   |
|        |                    |     |    |    |       | 618  | 853.9233  | 1705.832 | 2       | 1705.827 | 0.005    | 0      | 75.48  | 2.50E-06 | K      | FGTDEQAVDVVSNR                 | S         |   |
|        |                    |     |    |    |       | 620  | 569.6182  | 1705.833 | 3       | 1705.827 | 0.0057   | 0      | 46.6   | 0.0019   | K      | FGTDEQAVDVVSNR                 | S         |   |
|        |                    |     |    |    |       | 633  | 864.4109  | 1726.807 | 2       | 1726.802 | 0.0055   | 0      | 109.07 | 9.70E-10 | R      | LGTDESC'FNMLIATR               | S         |   |
|        |                    |     |    |    |       | 637  | 872.4094  | 1742.804 | 2       | 1742.797 | 0.0074   | 0      | 63.94  | 2.50E-05 | R      | LGTDESC'FNMLIATR               | S         |   |
|        |                    |     |    |    |       | 642  | 887.8598  | 1760.831 | 3       | 1760.825 | 0.0057   | 0      | 36.52  | 0.016    | K      | TLSTMIIASDTSGDYR               | L         |   |
|        |                    |     |    |    |       | 712  | 636.3389  | 1905.995 | 3       | 1905.988 | 0.0066   | 0      | 31.33  | 0.043    | K      | TLQC'ALNPAFFAAR                | I         |   |
|        |                    |     |    |    |       | 447  | 615.3243  | 1228.534 | 2       | 1228.63  | 0.0042   | 0      | 43.38  | 0.0056   | K      | LQEEQLNTAA                     | -         |   |
|        |                    |     |    |    |       | 455  | 622.9888  | 1242.558 | 2       | 1242.555 | 0.004    | 0      | 47.01  | 0.0013   | K      | TLQ'SAVYENK                    | -         |   |
|        |                    |     |    |    |       | 468  | 632.3711  | 1262.725 | 2       | 1262.72  | 0.0042   | 0      | 63.57  | 1.50E-05 | K      | AALESAPPYK                     | -         |   |
|        |                    |     |    |    |       | 539  | 721.3829  | 1440.751 | 2       | 1440.746 | 0.0053   | 0      | 78.74  | 1.10E-06 | K      | VIVLGTPEAEDGGK                 | I         |   |
|        |                    |     |    |    |       | 540  | 721.3829  | 1440.751 | 2       | 1440.746 | 0.0053   | 0      | 45.06  | 0.0025   | K      | VIVLGTPEAEDGGK                 | I         |   |
|        |                    |     |    |    |       | 787  | 710.0806  | 2127.22  | 3       | 2127.213 | 0.0075   | 0      | 31.31  | 0.0038   | K      | ALAMTALDVIKFALEGVK             | R         |   |
|        |                    |     |    |    |       | 788  | 715.412   | 2143.214 | 3       | 2143.208 | 0.0068   | 0      | 61.48  | 7.80E-06 | K      | ALAMTALDVIKFALEGVK             | R         |   |
|        |                    |     |    |    |       | 789  | 715.4124  | 2143.215 | 3       | 2143.208 | 0.0079   | 0      | 66.38  | 2.50E-06 | K      | ALAMTALDVIKFALEGVK             | R         |   |
|        |                    |     |    |    |       | 850  | 750.7401  | 2249.199 | 3       | 2249.19  | 0.0082   | 0      | 60.69  | 2.40E-05 | M      | GPVVERPAEPTGSAEELLEK           | R         |   |
|        |                    |     |    |    |       | 903  | 772.7414  | 2315.202 | 3       | 2315.195 | 0.0074   | 0      | 31.5   | 0.026    | K      | NGGVKPIIPSSELYVYFR             | A         |   |
|        |                    |     |    |    |       | 958  | 941.4513  | 2821.323 | 3       | 2821.323 | 0.0092   | 0      | 32.04  | 0.023    | R      | AAALATCG'TVDIESEAHYDYNVFNK     | A         |   |
|        |                    |     |    |    |       | 29   | 376.254   | 792.623  | 2       | 792.613  | 0.0033   | 0      | 40.46  | 0.015    | K      | C'DIEDK                        | K         |   |
|        |                    |     |    |    |       | 32   | 398.2417  | 794.4686 | 2       | 794.465  | 0.0038   | 0      | 39.19  | 0.0099   | K      | IAPPER                         | K         |   |
|        |                    |     |    |    |       | 192  | 488.7292  | 975.4439 | 2       | 975.441  | 0.0029   | 0      | 62.42  | 5.50E-05 | K      | AGFAGDDAPR                     | A         |   |
|        |                    |     |    |    |       | 354  | 565.7793  | 1129.544 | 2       | 1129.54  | 0.0037   | 0      | 44.78  | 0.0033   | R      | GYSFVITAEK                     | E         |   |
|        |                    |     |    |    |       | 557  | 500.8691  | 1498.705 | 3       | 1499.701 | 0.0049   | 0      | 32.69  | 0.047    | K      | QYVLEK                         | E         |   |
|        |                    |     |    |    |       | 659  | 750.8616  | 1498.706 | 2       | 1499.701 | 0.0059   | 0      | 59.97  | 0.0001   | K      | QYVLEK                         | E         |   |
|        |                    |     |    |    |       | 659  | 895.9529  | 1789.891 | 2       | 1789.885 | 0.0067   | 0      | 102    | 5.60E-09 | R      | SYELPDGOVITIGNER               | F         |   |
|        |                    |     |    |    |       | 734  | 978.5303  | 1955.046 | 2       | 1955.036 | 0.0096   | 0      | 32.27  | 0.026    | R      | VAPEEHTLTPAELNPK               | A         |   |
|        |                    |     |    |    |       | 924  | 791.3926  | 2371.156 | 3       | 2371.148 | 0.0081   | 1      | 48.21  | 0.00074  | R      | KOLYANNVLSGGTMTM@YPIADR        | M         |   |
|        |                    |     |    |    |       | 942  | 1288.585  | 2535.156 | 3       | 2535.151 | 0.0052   | 0      | 53.02  | 0.0001   | K      | LC'YVALDFENEMATAASSSLEK        | S         |   |
|        |                    |     |    |    |       | 945  | 851.3925  | 2551.156 | 3       | 2551.146 | 0.0098   | 0      | 45.6   | 0.0011   | K      | LC'YVALDFENEMATAASSSLEK        | S         |   |
|        |                    |     |    |    |       | 456  | 632.3182  | 1262.622 | 2       | 1262.618 | 0.0043   | 0      | 52.6   | 0.00082  | K      | DVOM@LQDAISK                   | L         |   |
|        |                    |     |    |    |       | 465  | 632.3182  | 1262.622 | 2       | 1262.618 | 0.0043   | 0      | 50.36  | 0.0012   | K      | DVOM@LQDAISK                   | L         |   |
|        |                    |     |    |    |       | 466  | 632.3185  | 1262.623 | 2       | 1262.618 | 0.0049   | 0      | 59.95  | 0.00013  | K      | DVOM@LQDAISK                   | L         |   |
|        |                    |     |    |    |       | 615  | 851.9129  | 1701.811 | 2       | 1701.806 | 0.0056   | 0      | 56.18  | 1.30E-07 | R      | ELEVESDGOFELEK                 | M         |   |
|        |                    |     |    |    |       | 622  | 854.4283  | 1706.842 | 2       | 1706.836 | 0.0059   | 0      | 34.5   | 0.031    | K      | EGEEAGPDLLEAVPK                | A         |   |
|        |                    |     |    |    |       | 861  | 1135.087  | 2268.159 | 2       | 2268.153 | 0.0063   | 0      | 65.8   | 1.10E-05 | R      | LPGGLDPEVVEYSLPEELQK           | C         |   |
|        |                    |     |    |    |       | 300  | 539.8123  | 1077.611 | 2       | 1077.607 | 0.003    | 0      | 36.45  | 0.019    | R      | NSYLEVILK                      | L         |   |
|        |                    |     |    |    |       | 370  | 576.254   | 1160.813 | 2       | 1160.803 | 0.0043   | 0      | 48.37  | 0.0067   | K      | GSEYVDVQGR                     | O         |   |
|        |                    |     |    |    |       | 515  | 693.8855  | 1385.756 | 2       | 1385.751 | 0.005    | 0      | 69.41  | 9.20E-06 | R      | TGEAVDAALSALR                  | L         |   |
|        |                    |     |    |    |       | 562  | 764.4307  | 1526.847 | 2       | 1526.842 | 0.0051   | 0      | 101.64 | 3.00E-09 | K      | LAAVDATVNOVLASR                | E         |   |
|        |                    |     |    |    |       | 583  | 801.4208  | 1600.827 | 2       | 1600.821 | 0.0061   | 0      | 53.83  | 0.00034  | R      | GSTAPVGGSGFSPTTR               | Y         |   |
|        |                    |     |    |    |       | 523  | 508.2689  | 1014.523 | 2       | 1014.521 | 0.0024   | 0      | 40.88  | 0.011    | K      | LGM@SAFYK                      | E         |   |
|        |                    |     |    |    |       | 408  | 498.334   | 1188.564 | 2       | 1188.563 | 0.0032   | 0      | 73.46  | 5.10E-05 | R      | VAPEEHTLTPAELNPK               | A         |   |
|        |                    |     |    |    |       | 547  | 727.8358  | 1453.657 | 2       | 1453.651 | 0.0064   | 0      | 57.09  | 0.00014  | R      | NVETM@NYADIER                  | T         |   |
|        |                    |     |    |    |       | 734  | 835.8334  | 1469.652 | 2       | 1469.646 | 0.0067   | 0      | 51.27  | 0.00035  | R      | NVETM@NYADIER                  | T         |   |
|        |                    |     |    |    |       | 791  | 1094.07   | 2186.126 | 2       | 2186.122 |          |        |        |          |        |                                |           |   |

|               |                        |     |          |         |       |       |               |          |                               |          |        |       |       |             |          |                    |          |        |   |      |        |   |           |   |
|---------------|------------------------|-----|----------|---------|-------|-------|---------------|----------|-------------------------------|----------|--------|-------|-------|-------------|----------|--------------------|----------|--------|---|------|--------|---|-----------|---|
| P68368        | Tubulin alpha-4A chain | 161 | 3        | 3       | 49892 | 4.95  | 904 703.3798  | 2107.118 | 3                             | 2107.11  | 0.0079 | 0     | 60.38 | 3.00E-05    | R        | M@VLAAGGVEHQDLDLAK | H        |        |   |      |        |   |           |   |
|               |                        |     |          |         |       |       | 1021 777.0782 | 2328.213 | 3                             | 2328.206 | 0.0069 | 0     | 73.68 | 1.80E-06    | K        | VVELLADIVQNSLSDSEK | H        |        |   |      |        |   |           |   |
|               |                        |     |          |         |       |       | 655 744.4457  | 1486.877 | 2                             | 1486.872 | 0.0051 | 0     | 77.29 | 3.40E-07    | F        | LISQVSSITASLR      | F        |        |   |      |        |   |           |   |
|               |                        |     |          |         |       |       | 760 858.4669  | 1714.919 | 2                             | 1714.914 | 0.0051 | 0     | 91.69 | 4.10E-08    | R        | AVFVDFLEPTVIDER    | F        |        |   |      |        |   |           |   |
|               |                        |     |          |         |       |       | 819 912.2095  | 1823.825 | 3                             | 1823.978 | 0.0083 | 0     | 44.55 | 0.0015      | K        | VGINVQVYVPGGDLAK   | F        |        |   |      |        |   |           |   |
|               |                        |     |          |         |       |       | 236 506.8126  | 1011.611 | 2                             | 1011.608 | 0.0029 | 0     | 34.52 | 0.017       | R        | NPSVLLTLR          | G        |        |   |      |        |   |           |   |
|               |                        |     |          |         |       |       | 366 557.3441  | 1112.674 | 2                             | 1112.671 | 0.003  | 0     | 49.28 | 0.00043     | K        | VPLALFALNR         | Q        |        |   |      |        |   |           |   |
|               |                        |     |          |         |       |       | 768 874.9654  | 1747.916 | 2                             | 1747.91  | 0.0058 | 0     | 45.01 | 0.0021      | M        | #ASTVRFPSFLGNLTK   | Q        |        |   |      |        |   |           |   |
|               |                        |     |          |         |       |       |               |          |                               |          |        |       |       |             |          |                    |          |        |   |      |        |   |           |   |
|               |                        |     |          |         |       |       | 11            | Q8CHT0   | 583                           | 18       | 13     | 61772 | 8.58  | 125 436.255 | 870.4952 | 2                  | 870.4923 | 0.0032 | 0 | 56.1 | 0.0003 | R | AIDALALAR | K |
| 153 444.2527  | 886.4908               | 2   | 886.4872 | 0.0036  | 0     | 40.88 |               |          |                               |          |        |       |       | 0.018       | K        | AIVQEATR           | M        |        |   |      |        |   |           |   |
| 178 459.2307  | 916.4469               | 2   | 916.4436 | 0.0033  | 0     | 75.94 |               |          |                               |          |        |       |       | 3.80E-06    | K        | AADMLSGPR          | R        |        |   |      |        |   |           |   |
| 194 467.2293  | 932.4421               | 2   | 932.4396 | 0.0036  | 0     | 58.57 |               |          |                               |          |        |       |       | 0.00022     | K        | AADM@LSGPR         | R        |        |   |      |        |   |           |   |
| 199 472.253   | 942.619                | 4   | 942.683  | 0.0083  | 0     | 51.24 |               |          |                               |          |        |       |       | 0.00091     | R        | QVADLR             | F        |        |   |      |        |   |           |   |
| 216 479.2405  | 956.4665               | 2   | 956.4637 | 0.0028  | 0     | 35.75 |               |          |                               |          |        |       |       | 0.031       | K        | DPOEPIK            | E        |        |   |      |        |   |           |   |
| 256 493.7341  | 985.4536               | 2   | 985.4505 | 0.0031  | 0     | 43.63 |               |          |                               |          |        |       |       | 0.0037      | R        | SAFEYGGOK          | C        |        |   |      |        |   |           |   |
| 608 613.7952  | 1225.576               | 2   | 1225.573 | 0.0032  | 0     | 52.75 |               |          |                               |          |        |       |       | 0.00049     | R        | NAAGNFYNDK         | S        |        |   |      |        |   |           |   |
| 608 613.7953  | 1225.576               | 2   | 1225.573 | 0.0034  | 0     | 53.77 |               |          |                               |          |        |       |       | 0.00039     | R        | NAAGNFYNDK         | C        |        |   |      |        |   |           |   |
| 783 724.3707  | 1446.727               | 2   | 1446.722 | 0.0053  | 0     | 55.5  |               |          |                               |          |        |       |       | 0.00034     | K        | STGVSVGOOPFGGAR    | A        |        |   |      |        |   |           |   |
| 871 561.627   | 1681.859               | 3   | 1681.854 | 0.0056  | 0     | 71.28 | 6.30E-06      | R        | ASGTNDKPGGPHYL                | W        |        |       |       |             |          |                    |          |        |   |      |        |   |           |   |
| 1016 992.5054 | 1982.996               | 2   | 1982.988 | 0.0086  | 0     | 58.72 | 9.40E-05      | K        | EEIFGVLTVVYYPDDK              | A        |        |       |       |             |          |                    |          |        |   |      |        |   |           |   |
| 1018 662.6538 | 1984.94                | 3   | 1984.942 | -0.0023 | 0     | 57.15 | 0.00013       | K        | VGDPAEFDGTFSSAVIDAK           | Y        |        |       |       |             |          |                    |          |        |   |      |        |   |           |   |
| 1020 993.4778 | 1984.947               | 3   | 1984.942 | -0.0008 | 0     | 72.75 | 4.90E-06      | K        | VGDPAEFDGTFSSAVIDAK           | A        |        |       |       |             |          |                    |          |        |   |      |        |   |           |   |
| 1021 993.4797 | 1984.945               | 2   | 1984.942 | 0.0029  | 0     | 57.92 | 0.00013       | K        | VGDPAEFDGTFSSAVIDAK           | A        |        |       |       |             |          |                    |          |        |   |      |        |   |           |   |
| 1022 662.6563 | 1984.947               | 3   | 1984.942 | 0.0051  | 0     | 44.71 | 0.0026        | K        | VGDPAEFDGTFSSAVIDAK           | A        |        |       |       |             |          |                    |          |        |   |      |        |   |           |   |
| 1247 857.437  | 2569.289               | 3   | 2569.281 | 0.0078  | 0     | 65.98 | 9.20E-06      | K        | FAVLEEGEQIPVSPSTNHVTVR        | A        |        |       |       |             |          |                    |          |        |   |      |        |   |           |   |
| 1248 857.4374 | 2569.291               | 3   | 2569.281 | 0.0082  | 0     | 68.96 | 5.10E-06      | K        | FAVLEEGEQIPVSPSTNHVTVR        | A        |        |       |       |             |          |                    |          |        |   |      |        |   |           |   |
| 111 434.7463  | 867.4781               | 2   | 867.4740 | 0.0032  | 0     | 34.93 | 0.032         | R        | MQHILAR                       | A        |        |       |       |             |          |                    |          |        |   |      |        |   |           |   |
| 204 473.7567  | 945.4988               | 2   | 945.4953 | 0.0035  | 0     | 37.7  | 0.033         | R        | VNLMAMDVGK                    | A        |        |       |       |             |          |                    |          |        |   |      |        |   |           |   |
| 206 481.7539  | 961.4933               | 2   | 961.4903 | 0.003   | 0     | 57.12 | 0.00044       | R        | VNLMAMDVGK                    | A        |        |       |       |             |          |                    |          |        |   |      |        |   |           |   |
| 302 510.2626  | 1018.511               | 2   | 1018.508 | 0.0022  | 0     | 40.68 | 0.016         | K        | GDYFLEAVR                     | M        |        |       |       |             |          |                    |          |        |   |      |        |   |           |   |
| 460 559.8079  | 1117.601               | 1   | 1117.598 | 0.0033  | 0     | 39.31 | 0.019         | K        | GGSDVLEAK                     | G        |        |       |       |             |          |                    |          |        |   |      |        |   |           |   |
| 492 517.3107  | 1140.607               | 2   | 1140.603 | 0.0042  | 0     | 46.49 | 0.0025        | R        | GDLEIPEAEK                    | V        |        |       |       |             |          |                    |          |        |   |      |        |   |           |   |
| 543 586.3213  | 1170.628               | 2   | 1170.624 | 0.0037  | 0     | 55.52 | 0.00033       | R        | LDIDSAPITAR                   | N        |        |       |       |             |          |                    |          |        |   |      |        |   |           |   |
| 577 599.2964  | 1196.578               | 2   | 1196.575 | 0.0035  | 0     | 57.93 | 0.0002        | K        | ITLDNAVMEK                    | C        |        |       |       |             |          |                    |          |        |   |      |        |   |           |   |
| 595 607.2941  | 1212.574               | 2   | 1212.57  | 0.004   | 0     | 49.69 | 0.0011        | K        | ITLDNAVMEK                    | N        |        |       |       |             |          |                    |          |        |   |      |        |   |           |   |
| 734 650.3596  | 1358.703               | 2   | 1358.698 | 0.005   | 0     | 59.95 | 0.00013       | R        | DTGIVTFPASR                   | C        |        |       |       |             |          |                    |          |        |   |      |        |   |           |   |
| 794 734.8454  | 1467.676               | 2   | 1467.67  | 0.0058  | 0     | 53.58 | 0.00038       | K        | C'DENILWLDYK                  | N        |        |       |       |             |          |                    |          |        |   |      |        |   |           |   |
| 835 793.897   | 1585.779               | 2   | 1585.774 | 0.0058  | 0     | 72.54 | 4.90E-06      | K        | DAVLNVAWEDVLR                 | V        |        |       |       |             |          |                    |          |        |   |      |        |   |           |   |
| 855 818.9514  | 1635.888               | 2   | 1635.883 | 0.005   | 0     | 50.74 | 0.0004        | K        | GVNLPGAADVLPVASEK             | D        |        |       |       |             |          |                    |          |        |   |      |        |   |           |   |
| 858 841.4114  | 1680.808               | 2   | 1680.803 | 0.0055  | 0     | 84.36 | 3.10E-07      | R        | GVLEADSDGM@VAR                | A        |        |       |       |             |          |                    |          |        |   |      |        |   |           |   |
| 917 589.002   | 1763.984               | 3   | 1763.978 | 0.0059  | 1     | 37.96 | 0.0038        | K        | KGVNLPAAVDLPAVSEK             | D        |        |       |       |             |          |                    |          |        |   |      |        |   |           |   |
| 929 890.4447  | 1778.875               | 2   | 1778.869 | 0.0062  | 0     | 70.93 | 6.70E-06      | K        | GADFLVTEVENGSLGSK             | K        |        |       |       |             |          |                    |          |        |   |      |        |   |           |   |
| 983 625.969   | 1874.885               | 3   | 1874.887 | -0.0022 | 0     | 46.82 | 0.0016        | K        | FGVEQVDM@VFASIR               | K        |        |       |       |             |          |                    |          |        |   |      |        |   |           |   |
| 984 938.4512  | 1874.888               | 2   | 1874.887 | 0.0006  | 0     | 46.99 | 0.0015        | K        | FGVEQVDM@VFASIR               | K        |        |       |       |             |          |                    |          |        |   |      |        |   |           |   |
| 990 938.9638  | 1874.888               | 3   | 1874.887 | 0.0006  | 0     | 46.99 | 0.0015        | K        | FGVEQVDM@VFASIR               | K        |        |       |       |             |          |                    |          |        |   |      |        |   |           |   |
| 665 640.3411  | 1278.668               | 2   | 1278.664 | 0.0035  | 0     | 42.05 | 0.007         | R        | YLLMLDQDR                     | N        |        |       |       |             |          |                    |          |        |   |      |        |   |           |   |
| 679 647.313   | 1292.611               | 2   | 1292.607 | 0.0044  | 0     | 41.72 | 0.0067        | K        | M@ATVYPEPONK                  | E        |        |       |       |             |          |                    |          |        |   |      |        |   |           |   |
| 680 648.3391  | 1294.664               | 2   | 1294.659 | 0.0046  | 0     | 34.95 | 0.03          | R        | YLLMLDQDR                     | N        |        |       |       |             |          |                    |          |        |   |      |        |   |           |   |
| 776 715.8692  | 1429.722               | 1   | 1429.716 | 0.0055  | 0     | 34.72 | 0.038         | K        | LFYSVLM@SVEK                  | F        |        |       |       |             |          |                    |          |        |   |      |        |   |           |   |
| 781 723.8648  | 1445.715               | 2   | 1445.711 | 0.0039  | 0     | 34.67 | 0.038         | K        | LFYSVLM@SVEK                  | F        |        |       |       |             |          |                    |          |        |   |      |        |   |           |   |
| 924 885.9689  | 1769.923               | 2   | 1769.917 | 0.0064  | 0     | 37.28 | 0.013         | R        | ILGLDGLG@NGM@GIPVVK           | L        |        |       |       |             |          |                    |          |        |   |      |        |   |           |   |
| 935 893.9666  | 1785.919               | 2   | 1785.912 | 0.0069  | 0     | 48.46 | 0.0011        | R        | ILGLDGLG@NGM@GIPVVK           | L        |        |       |       |             |          |                    |          |        |   |      |        |   |           |   |
| 976 923.9736  | 1845.933               | 2   | 1845.926 | 0.0063  | 0     | 98.51 | 1.10E-08      | R        | AIFASGSPFPDPLTDDR             | T        |        |       |       |             |          |                    |          |        |   |      |        |   |           |   |
| 977 923.9736  | 1845.933               | 2   | 1845.926 | 0.0066  | 0     | 74.67 | 2.80E-06      | R        | AIFASGSPFPDPLTDDR             | T        |        |       |       |             |          |                    |          |        |   |      |        |   |           |   |
| 986 939.4223  | 1876.824               | 3   | 1876.824 | 0.0064  | 0     | 81.02 | 3.00E-06      | R        | YGM@NC@LIQFEDFANR             | N        |        |       |       |             |          |                    |          |        |   |      |        |   |           |   |
| 989 631.9487  | 1892.824               | 3   | 1892.819 | 0.0058  | 0     | 31.55 | 0.021         | K        | YGM@NC@LIQFEDFANR             | N        |        |       |       |             |          |                    |          |        |   |      |        |   |           |   |
| 989 631.9487  | 1892.824               | 3   | 1892.819 | 0.0058  | 0     | 31.55 | 0.021         | K        | YGM@NC@LIQFEDFANR             | N        |        |       |       |             |          |                    |          |        |   |      |        |   |           |   |
| 989 631.9487  | 1892.824               | 3   | 1892.819 | 0.0058  | 0     | 31.55 | 0.021         | K        | YGM@NC@LIQFEDFANR             | N        |        |       |       |             |          |                    |          |        |   |      |        |   |           |   |
| 1025 669.6299 | 2005.868               | 3   | 2005.862 | 0.0063  | 0     | 28.05 | 0.042         | R        | GREYDFLDFEMEAASSK             | Y        |        |       |       |             |          |                    |          |        |   |      |        |   |           |   |
| 1026 1003.942 | 2005.87                | 3   | 2005.862 | 0.0063  | 0     | 69.25 | 3.10E-06      | R        | GREYDFLDFEMEAASSK             | Y        |        |       |       |             |          |                    |          |        |   |      |        |   |           |   |
| 1028 1011.939 | 2021.863               | 2   | 2021.856 | 0.0061  | 0     | 81.83 | 1.60E-07      | R        | GREYDFLDFEMEAASSK             | Y        |        |       |       |             |          |                    |          |        |   |      |        |   |           |   |
| 1081 737.7767 | 2210.308               | 3   | 2210.304 | 0.0046  | 0     | 47.33 | 6.70E-05      | K        | IKPTALGVAIGGAFTQLK            | D        |        |       |       |             |          |                    |          |        |   |      |        |   |           |   |
| 1236 842.7598 | 2525.257               | 3   | 2525.258 | -0.0019 | 0     | 45.37 | 0.0012        | K        | YC'TFNDIQGTSVAVAGLLAALR       | I        |        |       |       |             |          |                    |          |        |   |      |        |   |           |   |
| 1239 857.1505 | 2568.423               | 3   | 2568.421 | 0.0085  | 0     | 59.27 | 3.30E-05      | R        | QQLNIHGLLPPC@ISQELVLR         | I        |        |       |       |             |          |                    |          |        |   |      |        |   |           |   |
| 1240 857.1505 | 2568.423               | 3   | 2568.421 | 0.0085  | 0     | 59.27 | 3.30E-05      | R        | QQLNIHGLLPPC@ISQELVLR         | I        |        |       |       |             |          |                    |          |        |   |      |        |   |           |   |
| 1244 1289.648 | 2577.281               | 2   | 2577.276 | 0.0053  | 0     | 48.95 | 0.00055       | K        | FM@PIVYPTVGLAC@QOYSLAFR       | K        |        |       |       |             |          |                    |          |        |   |      |        |   |           |   |
| 1245 860.1021 | 2577.285               | 3   | 2577.276 | 0.0085  | 0     | 54.54 | 0.00014       | K        | FM@PIVYPTVGLAC@QOYSLAFR       | K        |        |       |       |             |          |                    |          |        |   |      |        |   |           |   |
| 1253 898.47   | 2692.388               | 3   | 2692.38  | 0.0085  | 0     | 54    | 0.00014       | R        | TLFPGGNNNSVFPVVALGVVAC@GLR    | H        |        |       |       |             |          |                    |          |        |   |      |        |   |           |   |
| 1254 898.4703 | 2692.389               | 3   | 2692.38  | 0.0086  | 0     | 54.3  | 0.00017       | R        | TLFPGGNNNSVFPVVALGVVAC@GLR    | H        |        |       |       |             |          |                    |          |        |   |      |        |   |           |   |
| 1268 977.835  | 2930.483               | 3   | 2930.488 | -0.0051 | 0     | 48.63 | 0.00039       | K        | LSDDTVLFGGAGEAALGIALHVV@AM@EK | E        |        |       |       |             |          |                    |          |        |   |      |        |   |           |   |
| 1269 977.8358 | 2930.485               | 3   | 2930.488 | -0.0027 | 0     | 52.43 | 0.00016       | K        | LSDDTVLFGGAGEAALGIALHVV@AM@EK | E        |        |       |       |             |          |                    |          |        |   |      |        |   |           |   |
| 1299 467.773  | 933.5215               | 2   | 933.5284 | 0.0032  | 0     | 46.39 | 0.0026        | K        | ITAFVVER                      | S        |        |       |       |             |          |                    |          |        |   |      |        |   |           |   |
| 392 562.2944  | 1014.574               | 2   | 1014.571 | 0.0033  | 0     | 37.49 | 0.033         | K        | ELTGVQNALK                    | E        |        |       |       |             |          |                    |          |        |   |      |        |   |           |   |
| 468 535.3107  | 1088.807               | 2   | 1088.804 | 0.0028  | 0     | 66.36 | 1.40E-05      | K        | VAVNMLNGR                     | F        |        |       |       |             |          |                    |          |        |   |      |        |   |           |   |
| 505 559.2915  | 1116.569               | 2   | 1116.566 | 0.0022  | 0     | 45.67 | 0.0046        | K        | VEDDTLQGLK                    | F        |        |       |       |             |          |                    |          |        |   |      |        |   |           |   |
| 559 561.2968  | 1120.579               | 2   | 1120.576 | 0.0027  | 0     | 58.57 | 0.00022       | K        | DFQIEAASIK                    | I        |        |       |       |             |          |                    |          |        |   |      |        |   |           |   |
| 589 574.3107  | 1146.607               | 2   | 1146.603 | 0.0035  | 0     | 71.74 | 9.80E-06      | R        | IFEGANDILR                    | L        |        |       |       |             |          |                    |          |        |   |      |        |   |           |   |
| 621 586.3392  | 1170.664               | 2   | 1170.661 | 0.0031  | 0     | 32.84 | 0.048         | K        | TRWVDAITGAVK                  | R        |        |       |       |             |          |                    |          |        |   |      |        |   |           |   |
| 644 598.2869  | 1194.559               | 2   | 1194.556 | 0.0036  | 0     | 49.22 | 0.0012        | R        | FFEEVNDPAK                    | N        |        |       |       |             |          |                    |          |        |   |      |        |   |           |   |
| 663 607.8007  | 1213.587               | 2   | 1213.584 | 0.0033  | 0     | 70.28 | 9.00E-06      | R        | FGM@AATLACTMK                 | S        |        |       |       |             |          |                    |          |        |   |      |        |   |           |   |
| 675 615.7986  | 1229.583               | 2   | 1229.578 | 0.0042  | 0     | 73.36 | 3.90E-06      | R        | FGM@AATLACTMK@K               | S        |        |       |       |             |          |                    |          |        |   |      |        |   |           |   |
| 725 641.3223  | 1280.632               | 2   | 1280.626 | 0.0043  | 0     | 48.59 | 0.0016        | R        | LPVALGCG@MDK                  | G        |        |       |       |             |          |                    |          |        |   |      |        |   |           |   |
| 741 619.3195  | 1296.624               | 2   | 1296.621 | 0.0037  | 0     | 65.06 | 3.50E-05      | R        | LPVALGCG@MDK                  | G        |        |       |       |             |          |                    |          |        |   |      |        |   |           |   |
| 755 658.8718  | 1315.729               | 2   | 1315.725 | 0.0042  | 0     | 53.83 | 0.00034       | K        | GVNEQFLLR                     | L        |        |       |       |             |          |                    |          |        |   |      |        |   |           |   |
| 794 708.8378  | 1415.661               | 2   | 1415.657 | 0.0041  | 0     | 65.39 | 2.40E-05      | K        | ASNTSEVYFDGVK                 | V        |        |       |       |             |          |                    |          |        |   |      |        |   |           |   |
| 811 723.8492  | 1445.684               | 2   | 1445.679 | 0.0052  | 0     | 38.31 | 0.013         | R        | SLSEGYPTAQHEK                 | M        |        |       |       |             |          |                    |          |        |   |      |        |   |           |   |
| 832 752.3671  | 1502.76                | 2   | 1502.755 | 0.0046  | 0     | 66.07 | 2.80E-05      | K        | GVNEQFLLR                     | L        |        |       |       |             |          |                    |          |        |   |      |        |   |           |   |
| 836 760.3851  | 1518.756               | 2   | 1518.75  | 0.0055  | 0     | 66.37 | 2.70E-05      | K        | NPFNGVLLM@GEAK                | Q        |        |       |       |             |          |                    |          |        |   |      |        |   |           |   |
| 842 773.8939  | 1545.773               | 2   | 1545.768 | 0.0057  | 0     | 74.76 | 3.70E-06      | K        | VPSENVLGEVGDGFK               | V        |        |       |       |             |          |                    |          |        |   |      |        |   |           |   |
| 964 911.4955  | 1820.977               | 2   | 1820.971 | 0.0059  | 0     | 42    | 0.0026        | R        | LADGADILYAM@VVVLSR            | A        |        |       |       |             |          |                    |          |        |   |      |        |   |           |   |
| 1004 989.5236 | 1975.033               | 2   | 1975.026 | 0.0063  | 0     | 81.9  | 3.90E-07      | R        | SGELAVQALDFATVVEAK            | A        |        |       |       |             |          |                    |          |        |   |      |        |   |           |   |
| 1005 989.5237 | 1975.035               | 1   | 1975.028 | 0.0068  | 0     | 89.77 | 7.30E-06      | R        | SGELAVQALDFATVVEAK            | A        |        |       |       |             |          |                    |          |        |   |      |        |   |           |   |
| 1053 707.0243 | 2118.051               | 3   | 2118.044 | 0.007   | 0     | 62.77 | 4.30E-05      | R        | EATQAVLKDPTLSSDASTR           | E        |        |       |       |             |          |                    |          |        |   |      |        |   |           |   |
| 1243 859.7833 | 2576.328               | 3   | 2576.324 |         |       |       |               |          |                               |          |        |       |       |             |          |                    |          |        |   |      |        |   |           |   |



|               |          |                                        |        |    |        |              |                                   |              |          |          |        |   |       |            |                   |   |
|---------------|----------|----------------------------------------|--------|----|--------|--------------|-----------------------------------|--------------|----------|----------|--------|---|-------|------------|-------------------|---|
| 13            | P50544   | Very long-chain specific acyl-CoA dehy | 1869   | 55 | 40     | 70831        | 8.91                              | 770 812.962  | 1623.89  | 1623.883 | 0.0063 | 0 | 37.0  | 0.0089 R   | TGAVDVPVGEELLGR   | V |
|               |          |                                        |        |    |        |              |                                   | 772 668.3477 | 1334.681 | 1334.677 | 0.0044 | 0 | 54.92 | 0.00038 K  | AAPAAAAAMAPPGR    | V |
|               |          |                                        |        |    |        |              |                                   | 827 745.4119 | 1488.809 | 1488.804 | 0.0056 | 0 | 70.61 | 5.30E-06 K | GLETIASDVSLASK    | A |
|               |          |                                        |        |    |        |              |                                   | 915 859.822  | 1737.95  | 1737.945 | 0.0052 | 0 | 31.81 | 0.027 K    | VPFLSPLFTMGAGTAR  | W |
|               |          |                                        |        |    |        |              |                                   | 923 877.9799 | 1753.945 | 1753.94  | 0.0055 | 0 | 61.87 | 3.30E-05 K | VPFLSPLFTMGAGTAR  | W |
|               |          |                                        |        |    |        |              |                                   | 971 915.5161 | 1837.018 | 1837.01  | 0.0078 | 0 | 42.42 | 0.0013 R   | VAPAPAVFTDIPISNIR | R |
|               |          |                                        |        |    |        |              |                                   | 110 432.7649 | 841.152  | 841.15   | 0.0036 | 0 | 35.6  | 0.017 K    | ELVGPVAR          | F |
|               |          |                                        |        |    |        |              |                                   | 148 443.7297 | 885.4449 | 885.4419 | 0.0031 | 0 | 35.4  | 0.029 K    | SFAVMGFK          | G |
|               |          |                                        |        |    |        |              |                                   | 192 467.7731 | 933.5317 | 933.5284 | 0.0033 | 0 | 46.2  | 0.0028 K   | ITAFVVER          | S |
|               |          |                                        |        |    |        |              |                                   | 264 508.2942 | 1014.574 | 1014.571 | 0.003  | 0 | 42.69 | 0.0099 K   | ELTGLGNALK        | N |
| 363 535.3105  | 1088.606 | 1088.604                               | 0.0025 | 0  | 85.95  | 1.60E-07 K   | VAVNLNNGR                         | F            |          |          |        |   |       |            |                   |   |
| 364 535.3105  | 1088.607 | 1088.604                               | 0.0026 | 0  | 48.43  | 0.00092 K    | VAVNLNNGR                         | F            |          |          |        |   |       |            |                   |   |
| 427 556.2674  | 1110.52  | 1110.517                               | 0.0034 | 0  | 48.25  | 0.0015 K     | IFC'SEAWK                         | F            |          |          |        |   |       |            |                   |   |
| 448 559.2914  | 1116.568 | 1116.566                               | 0.0021 | 0  | 57.83  | 0.00028 K    | VEDDTLQGLK                        | E            |          |          |        |   |       |            |                   |   |
| 447 561.2971  | 1120.58  | 1120.576                               | 0.0033 | 0  | 74.23  | 6.10E-06 K   | DFQIEANIK                         | I            |          |          |        |   |       |            |                   |   |
| 455 574.3106  | 1146.607 | 1146.603                               | 0.0034 | 0  | 81.05  | 1.20E-06 R   | IFEGEILR                          | L            |          |          |        |   |       |            |                   |   |
| 527 586.3397  | 1170.665 | 1170.661                               | 0.0041 | 1  | 33.67  | 0.037 K      | TRPKDAATGAVK                      | E            |          |          |        |   |       |            |                   |   |
| 544 592.8252  | 1183.636 | 1183.635                               | 0.0009 | 0  | 33.71  | 0.04 K       | IHNFGVQEK                         | L            |          |          |        |   |       |            |                   |   |
| 564 598.2869  | 1194.559 | 1194.556                               | 0.0035 | 0  | 52     | 0.00068 K    | FEEVNDPAK                         | N            |          |          |        |   |       |            |                   |   |
| 565 598.2872  | 1194.56  | 1194.556                               | 0.0041 | 0  | 37.55  | 0.018 R      | FEEVNDPAK                         | N            |          |          |        |   |       |            |                   |   |
| 593 607.8008  | 1213.587 | 1213.584                               | 0.0036 | 0  | 64.79  | 3.10E-05 R   | FQMB@AATLGTMK                     | R            |          |          |        |   |       |            |                   |   |
| 594 607.8011  | 1213.588 | 1213.584                               | 0.0042 | 0  | 78.23  | 1.40E-06 R   | FQMB@AATLGTMK                     | S            |          |          |        |   |       |            |                   |   |
| 608 614.8216  | 1227.629 | 1227.625                               | 0.0038 | 0  | 49.89  | 0.001 R      | SFGGVTGLPEK                       | K            |          |          |        |   |       |            |                   |   |
| 613 615.7882  | 1229.582 | 1229.578                               | 0.0033 | 0  | 48.36  | 0.0013 R     | FQMB@AATLGTMK@K                   | S            |          |          |        |   |       |            |                   |   |
| 614 615.7882  | 1229.582 | 1229.578                               | 0.0035 | 0  | 41.82  | 0.0057 R     | FQMB@AATLGTMK@K                   | S            |          |          |        |   |       |            |                   |   |
| 688 641.3225  | 1280.631 | 1280.626                               | 0.0047 | 0  | 64.38  | 4.60E-05 R   | LFVALQGC'MDK                      | G            |          |          |        |   |       |            |                   |   |
| 716 649.3193  | 1296.624 | 1296.621                               | 0.0035 | 0  | 48.5   | 0.0016 R     | LFVALQGC'M@DK                     | G            |          |          |        |   |       |            |                   |   |
| 736 658.8715  | 1315.729 | 1315.725                               | 0.0037 | 0  | 51.2   | 0.00063 K    | GVINEQFLLR                        | L            |          |          |        |   |       |            |                   |   |
| 794 708.838   | 1415.661 | 1415.657                               | 0.0045 | 0  | 68.79  | 1.00E-05 K   | ASNTSEVYFDGK                      | V            |          |          |        |   |       |            |                   |   |
| 795 708.8381  | 1415.662 | 1415.657                               | 0.0048 | 0  | 87.51  | 1.40E-07 R   | ASNTSEVYFDGK                      | V            |          |          |        |   |       |            |                   |   |
| 821 482.2819  | 1443.824 | 1443.82                                | 0.0042 | 1  | 28.55  | 0.05 K       | KGVINEQFLLR                       | V            |          |          |        |   |       |            |                   |   |
| 822 723.849   | 1445.683 | 1445.679                               | 0.0048 | 0  | 44.67  | 0.0029 R     | SLSEGYPTAQEK                      | M            |          |          |        |   |       |            |                   |   |
| 848 752.387   | 1502.76  | 1502.755                               | 0.0044 | 0  | 71.69  | 7.60E-06 K   | NPFQNVLLMGEAGK                    | Q            |          |          |        |   |       |            |                   |   |
| 854 507.2584  | 1515.753 | 1515.75                                | 0.0032 | 0  | 56.54  | 0.00025 K    | NPFQNVLLMGEAGK                    | Q            |          |          |        |   |       |            |                   |   |
| 855 760.3646  | 1518.755 | 1518.75                                | 0.0046 | 0  | 88.14  | 1.50E-07 K   | NPFQNVLLMGEAGK                    | Q            |          |          |        |   |       |            |                   |   |
| 900 516.2643  | 1545.771 | 1545.768                               | 0.0037 | 0  | 37.25  | 0.02 K       | VPSENVLGEVDGFK                    | V            |          |          |        |   |       |            |                   |   |
| 971 773.8933  | 1545.772 | 1545.768                               | 0.0046 | 0  | 94.41  | 3.80E-08 K   | VPSENVLGEVDGFK                    | V            |          |          |        |   |       |            |                   |   |
| 872 773.8934  | 1545.772 | 1545.768                               | 0.0047 | 0  | 82.54  | 6.10E-07 K   | VPSENVLGEVDGFK                    | V            |          |          |        |   |       |            |                   |   |
| 822 514.8495  | 1627.684 | 1627.679                               | 0.0051 | 0  | 57.65  | 4.60E-05 R   | MEI'C@S@IC'EA@TR                  | I            |          |          |        |   |       |            |                   |   |
| 1003 893.9059 | 1785.797 | 1785.792                               | 0.005  | 0  | 52.97  | 0.00025 K    | VADEC'QI@M@G@M@G@M@K              | E            |          |          |        |   |       |            |                   |   |
| 1023 602.6671 | 1804.98  | 1804.976                               | 0.0038 | 0  | 38.68  | 0.0051 R     | LADG@IDL@Y@M@V@V@L@R              | A            |          |          |        |   |       |            |                   |   |
| 1024 903.4985 | 1804.982 | 1804.976                               | 0.0067 | 0  | 94.09  | 1.20E-08 R   | LADG@IDL@Y@M@V@V@L@R              | A            |          |          |        |   |       |            |                   |   |
| 1040 909.9008 | 1817.787 | 1817.782                               | 0.0049 | 0  | 74.51  | 1.20E-06 R   | VADEC'QI@M@G@M@G@M@K              | E            |          |          |        |   |       |            |                   |   |
| 1041 606.8063 | 1817.787 | 1817.782                               | 0.005  | 0  | 29.65  | 0.035 K      | VADEC'QI@M@G@M@G@M@K              | E            |          |          |        |   |       |            |                   |   |
| 1042 909.9012 | 1817.788 | 1817.782                               | 0.0059 | 0  | 63.55  | 1.60E-05 K   | VADEC'QI@M@G@M@G@M@K              | E            |          |          |        |   |       |            |                   |   |
| 1044 607.999  | 1820.975 | 1820.971                               | 0.0044 | 0  | 53.43  | 0.00018 R    | LADG@IDL@Y@M@V@V@L@R              | A            |          |          |        |   |       |            |                   |   |
| 1045 911.4958 | 1820.977 | 1820.971                               | 0.0064 | 0  | 73.15  | 2.20E-06 R   | LADG@IDL@Y@M@V@V@L@R              | A            |          |          |        |   |       |            |                   |   |
| 1053 871.8996 | 1833.783 | 1833.777                               | 0.0057 | 0  | 40.84  | 0.0023 K     | VADEC'QI@M@G@M@G@M@K              | E            |          |          |        |   |       |            |                   |   |
| 1062 925.5065 | 1850.999 | 1850.993                               | 0.0054 | 0  | 78.13  | 1.0E-06 R    | IWISNGLADIVTFAK                   | E            |          |          |        |   |       |            |                   |   |
| 1073 627.348  | 1879.022 | 1879.016                               | 0.0057 | 0  | 62.73  | 1.80E-05 R   | TGIGSGLSLSGIVHPELSR               | S            |          |          |        |   |       |            |                   |   |
| 1074 940.5186 | 1879.023 | 1879.016                               | 0.0063 | 0  | 61.32  | 2.40E-05 R   | TGIGSGLSLSGIVHPELSR               | S            |          |          |        |   |       |            |                   |   |
| 1107 659.351  | 1975.031 | 1975.026                               | 0.0048 | 0  | 87.73  | 9.70E-08 R   | SEGLAV@ALD@F@T@V@E@K              | N            |          |          |        |   |       |            |                   |   |
| 1108 895.8234 | 1975.032 | 1975.026                               | 0.006  | 0  | 81.64  | 6.80E-05 PDK | SEGLAV@ALD@F@T@V@E@K              | N            |          |          |        |   |       |            |                   |   |
| 1125 667.989  | 2000.945 | 2000.937                               | 0.0078 | 0  | 52.83  | 0.00034 R    | ENMNASLQSSPHQELFR                 | N            |          |          |        |   |       |            |                   |   |
| 1172 707.0239 | 2118.05  | 2118.044                               | 0.0057 | 0  | 52.54  | 0.00044 R    | EATQ@VL@K@P@T@L@S@D@A@T@R         | E            |          |          |        |   |       |            |                   |   |
| 1246 568.5399 | 2270.13  | 2270.123                               | 0.0078 | 0  | 31.57  | 0.042 R      | IREN@M@L@Q@S@P@H@Q@L@F@R          | N            |          |          |        |   |       |            |                   |   |
| 1250 653.1348 | 2295.122 | 2295.118                               | 0.0048 | 0  | 46.82  | 0.0014 R     | IREN@M@L@Q@S@P@H@Q@L@F@R          | N            |          |          |        |   |       |            |                   |   |
| 1371 1247.619 | 2493.224 | 2493.217                               | 0.0065 | 0  | 77.66  | 6.90E-07 R   | VASGO@L@A@F@L@T@E@P@S@S@D@V@A@I@R | S            |          |          |        |   |       |            |                   |   |
| 1388 859.7842 | 2576.331 | 2576.324                               | 0.0073 | 0  | 67.91  | 5.20E-06 K   | ELG@F@G@L@V@P@S@E@L@G@L@S@T@Q@Y@R | L            |          |          |        |   |       |            |                   |   |
| 1397 1289.172 | 2576.33  | 2576.324                               | 0.0067 | 0  | 67.91  | 5.20E-06 K   | ELG@F@G@L@V@P@S@E@L@G@L@S@T@Q@Y@R | L            |          |          |        |   |       |            |                   |   |
| 179 421.7474  | 841.4803 | 841.477                                | 0.0033 | 0  | 52.63  | 0.00053 R    | IAA@N@G@R                         | F            |          |          |        |   |       |            |                   |   |
| 237 517.7021  | 1033.49  | 1033.486                               | 0.0034 | 0  | 48.89  | 0.0024 R     | SMFT@L@D@R                        | L            |          |          |        |   |       |            |                   |   |
| 371 538.2781  | 1074.542 | 1074.538                               | 0.0038 | 0  | 42.15  | 0.011 K      | DLE@L@M@D@R                       | S            |          |          |        |   |       |            |                   |   |
| 393 545.7976  | 1089.581 | 1089.578                               | 0.0028 | 0  | 93.81  | 6.70E-08 R   | LSGT@S@G@A@T@R                    | L            |          |          |        |   |       |            |                   |   |
| 461 565.2729  | 1128.531 | 1128.527                               | 0.0039 | 0  | 36.43  | 0.021 K      | FF@N@L@D@A@S@K                    | L            |          |          |        |   |       |            |                   |   |
| 460 573.2703  | 1144.542 | 1144.522                               | 0.0037 | 0  | 36.19  | 0.016 K      | FF@N@L@D@A@S@K                    | L            |          |          |        |   |       |            |                   |   |
| 684 639.8422  | 1277.67  | 1277.666                               | 0.0043 | 0  | 45.09  | 0.0033 K     | I@L@Y@T@P@T@G@W@K                 | F            |          |          |        |   |       |            |                   |   |
| 781 462.5812  | 1384.722 | 1384.717                               | 0.0045 | 0  | 38.26  | 0.016 R      | ID@M@H@V@V@P@Y@V@K                | K            |          |          |        |   |       |            |                   |   |
| 782 693.3683  | 1384.722 | 1384.717                               | 0.0048 | 0  | 49.5   | 0.0012 R     | ID@M@H@V@V@P@Y@V@K                | K            |          |          |        |   |       |            |                   |   |
| 827 726.3607  | 1450.707 | 1450.701                               | 0.0054 | 0  | 84.15  | 4.20E-07 K   | TIE@Y@I@P@D@L@K                   | V            |          |          |        |   |       |            |                   |   |
| 840 742.4042  | 1482.794 | 1482.791                               | 0.0035 | 0  | 48.41  | 0.00093 R    | F@M@T@A@M@P@K                     | V            |          |          |        |   |       |            |                   |   |
| 853 758.8282  | 1515.642 | 1515.637                               | 0.0053 | 0  | 90.64  | 2.90E-08 R   | Y@D@E@E@A@E@A@N@K                 | I            |          |          |        |   |       |            |                   |   |
| 912 540.2793  | 1617.816 | 1617.811                               | 0.005  | 0  | 33.97  | 0.039 K      | T@Q@Y@P@D@K@P@T@S@D@A@T@R         | K            |          |          |        |   |       |            |                   |   |
| 923 815.9099  | 1629.805 | 1629.8                                 | 0.0054 | 0  | 93.14  | 4.50E-08 K   | F@N@S@I@N@G@P@A@I@T@D@K           | I            |          |          |        |   |       |            |                   |   |
| 934 551.5583  | 1651.653 | 1651.65                                | 0.0031 | 0  | 34.09  | 0.0042 K     | S@E@H@D@F@A@F@D@G@D@D@R           | N            |          |          |        |   |       |            |                   |   |
| 980 872.3928  | 1742.771 | 1742.764                               | 0.0076 | 0  | 57.64  | 6.80E-05 PDK | A@N@S@E@P@V@D@S@K                 | E            |          |          |        |   |       |            |                   |   |
| 1067 622.2902 | 1863.849 | 1863.842                               | 0.0067 | 0  | 35.6   | 0.015 K      | L@S@L@G@E@S@F@G@S@D@H@I@R         | N            |          |          |        |   |       |            |                   |   |
| 1101 962.5888 | 1963.123 | 1963.118                               | 0.0056 | 0  | 40.3   | 0.00077 K    | I@N@D@P@V@M@L@P@L@S@I@A@L@K       | V            |          |          |        |   |       |            |                   |   |
| 1109 990.5655 | 1979.116 | 1979.113                               | 0.0039 | 0  | 59.77  | 1.50E-05 K   | I@N@D@P@V@M@L@P@L@S@I@A@L@K       | V            |          |          |        |   |       |            |                   |   |
| 1110 990.5655 | 1979.116 | 1979.113                               | 0.0053 | 0  | 55.7   | 3.60E-05 K   | I@N@D@P@V@M@L@P@L@S@I@A@L@K       | V            |          |          |        |   |       |            |                   |   |
| 1133 671.0522 | 2010.135 | 2010.13                                | 0.0051 | 0  | 44.03  | 0.00059 R    | L@V@I@G@N@G@I@S@T@P@A@V@S@C@I@R   | K            |          |          |        |   |       |            |                   |   |
| 1134 1006.075 | 2010.136 | 2010.13                                | 0.0061 | 0  | 73.37  | 7.40E-07 R   | L@V@I@G@N@G@I@S@T@P@A@V@S@C@I@R   | K            |          |          |        |   |       |            |                   |   |
| 1185 736.0608 | 2205.161 | 2205.154                               | 0.0063 | 0  | 61.48  | 2.60E-05 K   | A@I@G@I@T@A@S@H@N@P@G@N@D@F@G@I@K | F            |          |          |        |   |       |            |                   |   |
| 1302 778.6997 | 2331.187 | 2331.182                               | 0.0052 | 0  | 29.5   | 0.048 K      | FF@F@T@E@I@D@S@V@E@A@T@M@L@R      | D            |          |          |        |   |       |            |                   |   |
| 69 418.2394   | 834.4634 | 834.459                                | 0.0034 | 0  | 45.89  | 0.0041 D     | A@Y@N@K                           | A            |          |          |        |   |       |            |                   |   |
| 97 427.2079   | 852.4013 | 852.3978                               | 0.0035 | 0  | 34.46  | 0.046 R      | V@S@D@Y@R                         | N            |          |          |        |   |       |            |                   |   |
| 225 489.7799  | 977.5434 | 977.5406                               | 0.0027 | 0  | 38.95  | 0.012 R      | T@L@L@N@H@P@R                     | A            |          |          |        |   |       |            |                   |   |
| 294 517.3013  | 1032.588 | 1032.586                               | 0.0026 | 0  | 57.39  | 0.00019 K    | LIE@V@L@D@F@K                     | S            |          |          |        |   |       |            |                   |   |
| 458 564.7942  | 1127.574 | 1127.572                               | 0.0021 | 0  | 38.16  | 0.019 R      | S@P@M@L@P@M@P@K                   | P            |          |          |        |   |       |            |                   |   |
| 467 569.313   | 1136.611 | 1136.608                               | 0.0037 | 0  | 77.09  | 2.10E-06 R   | S@S@I@S@L@F@V@K                   | R            |          |          |        |   |       |            |                   |   |
| 531 588.8054  | 1175.596 | 1175.594                               | 0.0028 | 0  | 44.89  | 0.0054 K     | I@W@N@S@L@O@S@N@K                 | E            |          |          |        |   |       |            |                   |   |
| 603 611.8322  | 1221.65  | 1221.647                               | 0.0033 | 0  | 53.14  | 0.00053 K    | E@P@V@G@I@S@N@H@R                 | N            |          |          |        |   |       |            |                   |   |
| 676 638.7872  | 1275.58  | 1275.577                               | 0.0034 | 0  | 34.43  | 0.028 K      | G@M@G@D@S@T@V@E@Q@D@K             | N            |          |          |        |   |       |            |                   |   |
| 730 658.8422  | 1317.872 | 1317.868                               | 0.0041 | 0  | 53.78  | 0.00042 K    | Q@D@V@L@O@G@L@R                   | F            |          |          |        |   |       |            |                   |   |
| 897 532.9851  | 1595.934 | 1595.929                               | 0.0048 | 0  | 26.14  | 0.027 R      | Q@P@V@I@S@S@P@G@V@L@P@K           | Q            |          |          |        |   |       |            |                   |   |
| 898 798.9746  | 1595.935 | 1595.929                               | 0.006  | 0  | 40.24  | 0.0012 R     | Q@P@V@I@S@S@P@G@V@L@P@K           | Q            |          |          |        |   |       |            |                   |   |
| 917 811.3978  | 1620.781 | 1620.774                               | 0.0067 | 0  | 112.45 | 5.10E-10 K   | Q@L@D@E@F@O@T@S@G@V@G@E@R         | L            |          |          |        |   |       |            |                   |   |
| 951 853.9362  | 1698.787 | 1698.783                               | 0.0039 | 0  | 59.41  | 7.60E-05 R   | I@Y@Q@A@T@Y@E@S@A@L@R             | M            |          |          |        |   |       |            |                   |   |
| 962 845.4011  | 1688.788 | 1688.783                               | 0.0048 | 0  | 87.05  | 1.30E-07 R   | I@Y@Q@A@T@Y@E@S@A@L@R             | M            |          |          |        |   |       |            |                   |   |
| 994 591.9999  | 1772.975 | 1772.971                               | 0.004  | 0  | 30.95  | 0.024 R      | L@P@V@P@L@Q@S@L@D@Y@L@K           | A            |          |          |        |   |       |            |                   |   |
| 995 591.9993  |          |                                        |        |    |        |              |                                   |              |          |          |        |   |       |            |                   |   |

|  |  |  |  |  |  |      |          |          |   |          |        |   |        |          |   |                                      |   |
|--|--|--|--|--|--|------|----------|----------|---|----------|--------|---|--------|----------|---|--------------------------------------|---|
|  |  |  |  |  |  | 983  | 689.3214 | 1376.628 | 2 | 1376.624 | 0.0041 | 0 | 93.93  | 2.90E-08 | K | ANAGEESVMNLDK                        | L |
|  |  |  |  |  |  | 1007 | 697.3182 | 1392.622 | 2 | 1392.619 | 0.0028 | 0 | 101.03 | 5.20E-09 | K | ANAGEESVM@NLDK                       | L |
|  |  |  |  |  |  | 1086 | 491.9533 | 1472.838 | 3 | 1472.835 | 0.0029 | 0 | 36.14  | 0.0088   | R | LGANSLDLV@FGR                        | A |
|  |  |  |  |  |  | 1087 | 737.4266 | 1472.839 | 2 | 1472.835 | 0.0035 | 0 | 89.08  | 4.30E-08 | R | LGANSLDLV@FGR                        | A |
|  |  |  |  |  |  | 1124 | 513.9377 | 1538.791 | 3 | 1538.788 | 0.0037 | 0 | 33.82  | 0.036    | R | GVALC@HEDGSHR                        | I |
|  |  |  |  |  |  | 1125 | 770.4033 | 1538.792 | 2 | 1538.788 | 0.0046 | 0 | 97.52  | 1.50E-08 | R | GVALC@HEDGSHR                        | I |
|  |  |  |  |  |  | 1177 | 814.4113 | 1626.808 | 2 | 1626.804 | 0.0044 | 0 | 50.88  | 0.00067  | K | TLNEADC@ATVPPAIR                     | S |
|  |  |  |  |  |  | 1183 | 817.887  | 1633.759 | 2 | 1633.755 | 0.0042 | 0 | 45.04  | 0.0021   | R | AC@ALSIHES@RPGDK                     | K |
|  |  |  |  |  |  | 1240 | 819.4238 | 1756.851 | 2 | 1756.845 | 0.0059 | 0 | 89.07  | 1.00E-07 | R | AAFG@EAGF@ACTL@M                     | E |
|  |  |  |  |  |  | 1265 | 924.9957 | 1847.977 | 2 | 1847.97  | 0.0065 | 0 | 98.5   | 7.10E-09 | R | LPQISSETAM@FAGVDVTK                  | E |
|  |  |  |  |  |  | 1296 | 924.9957 | 1847.977 | 2 | 1847.97  | 0.0065 | 0 | 92.54  | 2.80E-08 | R | LPQISSETAM@FAGVDVTK                  | E |
|  |  |  |  |  |  | 1297 | 616.9997 | 1847.977 | 3 | 1847.97  | 0.007  | 0 | 34.94  | 0.016    | R | LPQISSETAM@FAGVDVTK                  | E |
|  |  |  |  |  |  | 1302 | 932.9623 | 1863.97  | 2 | 1863.965 | 0.0049 | 0 | 44.22  | 0.0024   | R | LPQISSETAM@FAGVDVTK                  | E |
|  |  |  |  |  |  | 1303 | 932.964  | 1863.974 | 2 | 1863.965 | 0.0083 | 0 | 46.59  | 0.0014   | R | LPQISSETAM@FAGVDVTK                  | E |
|  |  |  |  |  |  | 1304 | 622.3319 | 1863.974 | 3 | 1863.965 | 0.0087 | 0 | 42.75  | 0.0033   | R | LPQISSETAM@FAGVDVTK                  | E |
|  |  |  |  |  |  | 1305 | 622.3321 | 1863.974 | 3 | 1863.965 | 0.0092 | 0 | 35.38  | 0.019    | R | LPQISSETAM@FAGVDVTK                  | E |
|  |  |  |  |  |  | 1386 | 685.0182 | 2052.033 | 3 | 2052.028 | 0.0051 | 1 | 36.11  | 0.015    | K | VRVDEYD@KPGQGGK                      | K |
|  |  |  |  |  |  | 1458 | 125.995  | 2249.975 | 2 | 2249.968 | 0.0073 | 0 | 60.66  | 2.30E-07 | R | TYFSC@SAHTSDGDT@M@VTR                | A |
|  |  |  |  |  |  | 1459 | 750.9992 | 2249.976 | 3 | 2249.968 | 0.0076 | 0 | 54.62  | 8.90E-05 | R | TYFSC@SAHTSDGDT@M@VTR                | A |
|  |  |  |  |  |  | 1468 | 756.3306 | 2265.97  | 3 | 2265.963 | 0.007  | 0 | 52.72  | 0.00011  | R | TYFSC@SAHTSDGDT@M@VTR                | A |
|  |  |  |  |  |  | 1520 | 780.7406 | 2338.2   | 3 | 2339.198 | 0.0016 | 0 | 38.71  | 0.0062   | K | EPFIP@LPTVHYMM@GPIPTNYK              | G |
|  |  |  |  |  |  | 1526 | 786.0735 | 2355.193 | 3 | 2355.193 | 0.0053 | 0 | 30.12  | 0.047    | K | EPFIP@LPTVHYMM@GPIPTNYK              | G |
|  |  |  |  |  |  | 1621 | 984.4626 | 2950.366 | 2 | 2950.366 | 0.0069 | 0 | 78.96  | 6.00E-07 | R | HYNGQD@VGL@YAC@GEAAC@SVH@GNR         | R |
|  |  |  |  |  |  | 178  | 420.7521 | 839.4896 | 2 | 839.4865 | 0.0031 | 0 | 34.28  | 0.023    | K | ELVGP@V@R                            | F |
|  |  |  |  |  |  | 370  | 535.3106 | 1068.607 | 2 | 1068.604 | 0.0027 | 0 | 65.57  | 1.80E-05 | R | VAVN@LNGR                            | F |
|  |  |  |  |  |  | 469  | 559.2919 | 1116.569 | 2 | 1116.566 | 0.0029 | 0 | 40.4   | 0.017    | K | VEDD@T@L@G@L                         | L |
|  |  |  |  |  |  | 478  | 551.2972 | 1120.58  | 2 | 1120.576 | 0.0034 | 0 | 80.38  | 1.50E-06 | K | DF@Q@E@A@I@K                         | L |
|  |  |  |  |  |  | 539  | 574.3102 | 1146.606 | 2 | 1146.603 | 0.0026 | 0 | 64.16  | 5.90E-05 | R | IFEG@ND@L@R                          | L |
|  |  |  |  |  |  | 602  | 586.3393 | 1170.664 | 2 | 1170.661 | 0.0032 | 1 | 58.56  | 0.00013  | K | TPK@D@A@T@G@V@K                      | E |
|  |  |  |  |  |  | 634  | 592.8265 | 1183.639 | 2 | 1183.635 | 0.0036 | 0 | 40.01  | 0.0096   | K | IHF@N@V@I@E@K                        | L |
|  |  |  |  |  |  | 667  | 598.2864 | 1194.558 | 2 | 1194.556 | 0.0026 | 0 | 43.87  | 0.0046   | R | FFEE@N@D@P@K                         | N |
|  |  |  |  |  |  | 708  | 607.8005 | 1213.586 | 2 | 1213.584 | 0.0029 | 0 | 50.28  | 0.00092  | M | FGMA@A@T@L@G@T@M@K                   | S |
|  |  |  |  |  |  | 742  | 614.8213 | 1227.628 | 2 | 1227.625 | 0.0033 | 0 | 45.15  | 0.0032   | R | SFG@V@T@H@L@P@E@K                    | K |
|  |  |  |  |  |  | 747  | 615.7983 | 1229.582 | 2 | 1229.578 | 0.0037 | 0 | 69.2   | 1.00E-05 | R | FGM@A@T@L@G@T@M@K                    | S |
|  |  |  |  |  |  | 844  | 641.3215 | 1280.629 | 2 | 1280.626 | 0.0028 | 0 | 53.53  | 0.00056  | R | LF@V@L@O@G@M@D@K                     | G |
|  |  |  |  |  |  | 865  | 649.3192 | 1296.624 | 2 | 1296.621 | 0.0031 | 0 | 53.85  | 0.00048  | R | LF@V@L@O@G@M@D@K                     | G |
|  |  |  |  |  |  | 910  | 658.8714 | 1315.728 | 2 | 1315.725 | 0.0034 | 0 | 51.8   | 0.00015  | K | GV@N@E@F@L@L@R                       | V |
|  |  |  |  |  |  | 1028 | 708.8377 | 1415.661 | 2 | 1415.657 | 0.004  | 0 | 61.23  | 6.10E-05 | K | ASNTSEV@F@D@V@K                      | V |
|  |  |  |  |  |  | 1067 | 723.8486 | 1445.683 | 2 | 1445.679 | 0.0039 | 0 | 43.03  | 0.004    | R | SLSE@Y@P@T@Q@H@E@K                   | M |
|  |  |  |  |  |  | 1115 | 763.3844 | 1518.754 | 2 | 1518.75  | 0.0042 | 0 | 74.03  | 4.20E-06 | K | NPF@N@V@L@L@M@G@E@A@K                | Q |
|  |  |  |  |  |  | 1129 | 783.8831 | 1545.672 | 2 | 1545.668 | 0.0042 | 0 | 79.45  | 1.10E-06 | R | VPS@N@V@L@G@V@D@G@F@K                | V |
|  |  |  |  |  |  | 1272 | 903.4979 | 1804.981 | 2 | 1804.976 | 0.0055 | 0 | 98.81  | 4.30E-09 | R | LAD@G@I@D@L@Y@M@V@V@L@S@R            | A |
|  |  |  |  |  |  | 1281 | 911.4945 | 1820.975 | 2 | 1820.971 | 0.0039 | 0 | 57.8   | 8.30E-05 | R | LAD@G@I@D@L@Y@M@V@V@L@S@R            | A |
|  |  |  |  |  |  | 1282 | 607.999  | 1820.975 | 3 | 1820.971 | 0.0048 | 0 | 39.9   | 0.0042   | R | LAD@G@I@D@L@Y@M@V@V@L@S@R            | A |
|  |  |  |  |  |  | 1313 | 627.3473 | 1879.02  | 3 | 1879.016 | 0.0037 | 0 | 75.56  | 8.70E-07 | R | TG@I@G@S@L@S@G@V@H@P@E@L@S@R         | S |
|  |  |  |  |  |  | 1314 | 940.1176 | 1879.021 | 2 | 1879.016 | 0.0043 | 0 | 82.96  | 1.60E-07 | R | TG@I@G@S@L@S@G@V@H@P@E@L@S@R         | S |
|  |  |  |  |  |  | 1356 | 659.35   | 1975.028 | 3 | 1975.026 | 0.0019 | 0 | 76.04  | 1.40E-06 | R | S@G@L@V@A@L@D@Q@F@A@T@V@E@A@K        | L |
|  |  |  |  |  |  | 1357 | 988.523  | 1975.032 | 2 | 1975.026 | 0.0052 | 0 | 102.99 | 2.90E-09 | R | S@G@L@V@A@L@D@Q@F@A@T@V@E@A@K        | L |
|  |  |  |  |  |  | 1585 | 859.7844 | 2576.331 | 3 | 2576.324 | 0.008  | 0 | 34.19  | 0.012    | K | EL@G@F@L@Q@V@P@S@E@L@L@G@S@N@T@Q@Y@R | L |
|  |  |  |  |  |  | 1601 | 857.9637 | 2576.331 | 3 | 2576.324 | 0.0052 | 0 | 43.67  | 0.0057   | R | EL@G@F@L@Q@V@P@S@E@L@L@G@S@N@T@Q@Y@R | L |
|  |  |  |  |  |  | 601  | 598.3205 | 1170.626 | 2 | 1170.625 | 0.002  | 0 | 35.53  | 0.031    | R | V@D@L@G@A@I@D@K                      | G |
|  |  |  |  |  |  | 855  | 644.3523 | 1286.69  | 2 | 1286.687 | 0.003  | 0 | 68.02  | 2.10E-05 | K | H@L@I@Y@D@L@S@K                      | L |
|  |  |  |  |  |  | 911  | 658.8763 | 1315.738 | 2 | 1315.735 | 0.0033 | 0 | 75.15  | 2.50E-06 | K | TS@I@D@I@N@I@O@K                     | R |
|  |  |  |  |  |  | 928  | 664.3595 | 1326.704 | 2 | 1326.701 | 0.0039 | 0 | 58.89  | 0.00013  | K | LY@C@H@V@A@I@G@K                     | R |
|  |  |  |  |  |  | 1037 | 712.3422 | 1422.627 | 2 | 1422.666 | 0.0037 | 0 | 81.77  | 5.70E-07 | K | T@G@T@A@E@S@L@E@E@R                  | L |
|  |  |  |  |  |  | 1055 | 719.9298 | 1437.845 | 2 | 1437.842 | 0.0035 | 0 | 27.1   | 0.037    | K | G@I@R@P@A@I@N@V@L@S@V@S@R            | V |
|  |  |  |  |  |  | 1056 | 480.289  | 1437.845 | 3 | 1437.842 | 0.0037 | 0 | 25.57  | 0.047    | K | G@I@R@P@A@I@N@V@L@S@V@S@R            | V |
|  |  |  |  |  |  | 1058 | 720.3401 | 1438.666 | 2 | 1438.661 | 0.0048 | 0 | 47.47  | 0.0015   | K | T@G@T@A@E@S@L@E@E@R                  | L |
|  |  |  |  |  |  | 1136 | 777.3754 | 1552.736 | 2 | 1552.731 | 0.0052 | 0 | 63.64  | 4.30E-05 | R | E@A@Y@F@I@P@S@D@V@A@T@E@K            | F |
|  |  |  |  |  |  | 1147 | 758.3991 | 1574.784 | 2 | 1574.779 | 0.0049 | 0 | 100.06 | 9.00E-09 | R | I@L@G@A@D@T@S@D@L@E@E@T@R            | V |
|  |  |  |  |  |  | 1148 | 789.4342 | 1576.854 | 2 | 1576.85  | 0.0038 | 1 | 37.15  | 0.011    | K | L@K@E@I@T@N@F@L@A@G@E@P              | - |
|  |  |  |  |  |  | 1204 | 834.4026 | 1666.791 | 2 | 1666.787 | 0.0034 | 0 | 38.97  | 0.012    | R | N@V@Q@A@E@M@V@E@S@S@L@K              | G |
|  |  |  |  |  |  | 1208 | 842.4011 | 1682.788 | 2 | 1682.782 | 0.0054 | 0 | 49.15  | 0.00089  | R | N@V@Q@A@E@M@V@E@S@S@L@K              | G |
|  |  |  |  |  |  | 1516 | 689.591  | 2337.167 | 2 | 2337.16  | 0.0068 | 0 | 102.88 | 2.80E-09 | K | E@V@A@E@F@G@S@D@A@T@Q@L@L@S@R        | G |
|  |  |  |  |  |  | 119  | 435.2653 | 868.5162 | 2 | 868.513  | 0.003  | 0 | 68.53  | 8.80E-06 | R | L@V@S@Q@V@R                          | S |
|  |  |  |  |  |  | 158  | 458.2863 | 914.558  | 2 | 914.5549 | 0.0031 | 1 | 41.79  | 0.0055   | R | K@I@L@D@S@A@R                        | A |
|  |  |  |  |  |  | 178  | 468.7298 | 935.445  | 2 | 935.4422 | 0.0027 | 0 | 48.01  | 0.0025   | R | M@I@P@T@P@S@Y@K                      | V |
|  |  |  |  |  |  | 221  | 489.7912 | 971.785  | 2 | 971.7858 | 0.002  | 0 | 36.53  | 0.019    | K | H@S@I@D@K                            | V |
|  |  |  |  |  |  | 1006 | 464.9222 | 1391.745 | 3 | 1391.741 | 0.0038 | 1 | 45.79  | 0.0021   | R | K@I@S@S@D@L@G@H@P@V@K                | O |
|  |  |  |  |  |  | 1134 | 517.6143 | 1549.821 | 3 | 1549.817 | 0.0035 | 1 | 43.17  | 0.0036   | K | M@F@G@I@D@K@A@I@Q@A@V@K              | G |
|  |  |  |  |  |  | 1135 | 775.9182 | 1549.822 | 2 | 1549.817 | 0.0045 | 1 | 51.92  | 0.00042  | K | M@F@G@I@D@K@A@I@Q@A@V@K              | G |
|  |  |  |  |  |  | 1192 | 826.4628 | 1650.791 | 2 | 1650.787 | 0.0045 | 0 | 47.29  | 0.0018   | R | T@V@F@C@S@T@F@A@F@T@R                | A |
|  |  |  |  |  |  | 1323 | 957.8637 | 1913.915 | 2 | 1913.908 | 0.0048 | 0 | 65.18  | 2.90E-05 | R | S@V@P@M@S@T@V@F@P@S@D@V@A@T@E@K      | A |
|  |  |  |  |  |  | 1338 | 965.9623 | 1929.91  | 2 | 1929.903 | 0.0071 | 0 | 40.26  | 0.0068   | R | S@V@P@M@S@T@V@F@P@S@D@V@A@T@E@K      | A |
|  |  |  |  |  |  | 1371 | 670.3401 | 2007.998 | 3 | 2007.994 | 0.0049 | 0 | 43.92  | 0.0024   | K | N@M@E@I@Q@E@I@S@V@Q@V@K              | K |
|  |  |  |  |  |  | 1374 | 1010.542 | 2019.068 | 2 | 2019.064 | 0.0057 | 0 | 90.59  | 4.00E-08 | K | I@L@T@P@R@E@D@P@A@S@D@I@A@N@I@R      | M |
|  |  |  |  |  |  | 1589 | 827.7408 | 2480.201 | 3 | 2480.193 | 0.0076 | 0 | 68.95  | 6.10E-05 | R | T@S@R@E@A@I@N@S@N@E@D@F@V@G@Q@A@K    | N |
|  |  |  |  |  |  | 139  | 444.2648 | 886.5151 | 2 | 886.5124 | 0.0027 | 0 | 44.19  | 0.0078   | K | V@N@S@V@D@K                          | Q |
|  |  |  |  |  |  | 537  | 573.321  | 1144.627 | 2 | 1144.624 | 0.0034 | 0 | 35.83  | 0.038    | K | V@F@A@S@L@P@V@E@R                    | L |
|  |  |  |  |  |  | 1116 | 762.4209 | 1522.822 | 2 | 1522.824 | 0.003  | 1 | 51.33  | 0.00047  | R | V@Y@S@I@A@L@T@K@D@E@K                | L |
|  |  |  |  |  |  | 1117 | 508.6165 | 1522.822 | 3 | 1522.824 | 0.0036 | 1 | 34.27  | 0.023    | R | V@Y@S@                               |   |

|  |  |  |    |  |  |  |  |  |      |          |          |   |          |        |   |       |          |   |                            |   |
|--|--|--|----|--|--|--|--|--|------|----------|----------|---|----------|--------|---|-------|----------|---|----------------------------|---|
|  |  |  |    |  |  |  |  |  | 1147 | 1001.48  | 2000.946 | 2 | 2000.937 | 0.0084 | 0 | 65.82 | 1.70E-05 | R | ENMASLQSSPQHGLFR           | N |
|  |  |  |    |  |  |  |  |  | 1191 | 707.0235 | 2118.049 | 3 | 2118.044 | 0.0046 | 0 | 70.18 | 7.60E-06 | R | EATQAVLDKPELSSDASTR        | N |
|  |  |  |    |  |  |  |  |  | 1193 | 1060.032 | 2118.05  | 2 | 2118.044 | 0.0061 | 0 | 54.65 | 0.00027  | R | EATQAVLDKPELSSDASTR        | E |
|  |  |  |    |  |  |  |  |  | 1246 | 757.7177 | 2270.131 | 3 | 2270.123 | 0.0086 | 0 | 45.87 | 0.0016   | R | IRENMAISLQSSPQHGLFR        | E |
|  |  |  |    |  |  |  |  |  | 1335 | 1247.62  | 2493.225 | 2 | 2493.217 | 0.0098 | 0 | 76.86 | 8.40E-07 | R | VASGALAFCLTEPSSGVSASIR     | N |
|  |  |  |    |  |  |  |  |  | 1350 | 859.7833 | 2576.328 | 3 | 2576.324 | 0.0047 | 0 | 34.18 | 0.012    | K | ELGAGFLQVPELGGGLSNTQYAR    | N |
|  |  |  |    |  |  |  |  |  | 1351 | 1289.173 | 2576.332 | 2 | 2576.324 | 0.0087 | 0 | 86.32 | 7.40E-08 | K | ELGAGFLQVPELGGGLSNTQYAR    | L |
|  |  |  |    |  |  |  |  |  | 1355 | 866.1282 | 2595.363 | 3 | 2594.353 | 1.01   | 0 | 40.89 | 0.0019   | R | LAENVGM@HDLGVSVTLGAHQSIFGK | L |
|  |  |  |    |  |  |  |  |  | 1358 | 1369.21  | 2736.406 | 2 | 2736.401 | 0.0063 | 0 | 41.79 | 0.0021   | K | GOLTDVFPYPSVLSSEAGQFLK     | E |
|  |  |  |    |  |  |  |  |  | 1369 | 913.1439 | 2736.41  | 3 | 2736.401 | 0.0087 | 0 | 48.16 | 0.0005   | K | GOLTDVFPYPSVLSSEAGQFLK     | E |
|  |  |  |    |  |  |  |  |  | 1370 | 913.1439 | 2736.41  | 3 | 2736.401 | 0.0089 | 0 | 41.05 | 0.0026   | K | GOLTDVFPYPSVLSSEAGQFLK     | E |
|  |  |  |    |  |  |  |  |  | 1375 | 930.7573 | 2789.25  | 3 | 2789.242 | 0.0081 | 0 | 44.82 | 0.00091  | R | M@AIIQVYTESM@AYM@LSANMDQGF | D |
|  |  |  |    |  |  |  |  |  | 1378 | 936.8892 | 2805.246 | 3 | 2805.237 | 0.0089 | 0 | 58.87 | 2.70E-05 | R | M@AIIQVYTESM@AYM@LSANMDQGF | D |
|  |  |  |    |  |  |  |  |  | 1379 | 936.8892 | 2805.247 | 3 | 2805.237 | 0.0089 | 0 | 70.17 | 2.00E-05 | R | M@AIIQVYTESM@AYM@LSANMDQGF | D |
|  |  |  |    |  |  |  |  |  | 1779 | 668.3479 | 1334.681 | 2 | 1334.677 | 0.0028 | 0 | 33.19 | 0.029    | K | ILVPEGR                    | D |
|  |  |  |    |  |  |  |  |  | 1780 | 668.3479 | 1334.681 | 2 | 1334.677 | 0.0048 | 0 | 50.26 | 0.0012   | K | AAPAAAAA@APPGR             | D |
|  |  |  |    |  |  |  |  |  | 680  | 745.4114 | 1488.808 | 2 | 1488.804 | 0.0047 | 0 | 68.05 | 9.90E-06 | K | GLETIASDVSLSAK             | A |
|  |  |  |    |  |  |  |  |  | 940  | 10.8909  | 1919.767 | 1 | 1919.761 | 0.0058 | 0 | 39.71 | 0.0096   | K | VPEASVSM@DVTIR             | A |
|  |  |  |    |  |  |  |  |  | 991  | 869.982  | 1737.949 | 2 | 1737.945 | 0.0047 | 0 | 59.44 | 4.60E-05 | K | VPLPSSLPTM@QAGTIAR         | W |
|  |  |  |    |  |  |  |  |  | 1001 | 585.6558 | 1753.946 | 3 | 1753.94  | 0.006  | 0 | 37.52 | 0.0091   | K | VPLPSSLPTM@QAGTIAR         | W |
|  |  |  |    |  |  |  |  |  | 1002 | 877.981  | 1753.947 | 2 | 1753.94  | 0.0077 | 0 | 37.95 | 0.0077   | K | VPLPSSLPTM@QAGTIAR         | W |
|  |  |  |    |  |  |  |  |  | 1066 | 613.346  | 1837.016 | 3 | 1837.01  | 0.0074 | 0 | 28.52 | 0.036    | R | VAPAPAGVTDIPISNR           | R |
|  |  |  |    |  |  |  |  |  | 1067 | 613.346  | 1837.017 | 3 | 1837.01  | 0.0074 | 0 | 76.57 | 5.50E-07 | R | VAPAPAGVTDIPISNR           | R |
|  |  |  |    |  |  |  |  |  | 1321 | 813.4131 | 2437.215 | 2 | 2437.21  | 0.0076 | 0 | 39.7  | 0.0052   | K | LOPHEFGGTTSLNGLM@FGIK      | N |
|  |  |  |    |  |  |  |  |  | 38   | 400.7491 | 799.4836 | 2 | 799.4804 | 0.0033 | 0 | 44.67 | 0.0054   | R | VGLVADK                    | G |
|  |  |  |    |  |  |  |  |  | 437  | 556.3159 | 1110.617 | 2 | 1110.615 | 0.0026 | 0 | 54.42 | 0.00027  | K | TVLTGASGHLR                | S |
|  |  |  |    |  |  |  |  |  | 442  | 556.3256 | 1114.637 | 2 | 1114.635 | 0.0019 | 0 | 79.83 | 9.90E-07 | K | VLVSGSNK                   | S |
|  |  |  |    |  |  |  |  |  | 844  | 715.4098 | 1428.805 | 2 | 1428.798 | 0.0074 | 0 | 54.33 | 0.00018  | R | IFTVDNLLPVGK               | A |
|  |  |  |    |  |  |  |  |  | 889  | 504.613  | 1510.817 | 3 | 1510.814 | 0.0027 | 0 | 39.09 | 0.0076   | R | LVAYTYLIGASQR              | E |
|  |  |  |    |  |  |  |  |  | 890  | 756.4167 | 1510.819 | 2 | 1510.814 | 0.0045 | 0 | 33.75 | 0.022    | R | LVAYTYLIGASQR              | E |
|  |  |  |    |  |  |  |  |  | 1121 | 975.4821 | 1948.97  | 2 | 1948.961 | 0.0092 | 0 | 60.9  | 5.70E-05 | K | AVM@VSPGSLVFIQTDK          | E |
|  |  |  |    |  |  |  |  |  | 484  | 849.1127 | 1317.672 | 2 | 1317.668 | 0.0031 | 0 | 43.2  | 0.006    | R | SAGSIFK                    | F |
|  |  |  |    |  |  |  |  |  | 762  | 659.8432 | 1317.672 | 2 | 1317.668 | 0.0041 | 0 | 74.87 | 4.50E-06 | K | QDFVLOGDLR                 | A |
|  |  |  |    |  |  |  |  |  | 941  | 811.397  | 1620.78  | 2 | 1620.774 | 0.0051 | 0 | 86.34 | 1.90E-07 | K | QLVDFEOTSGGVGER            | L |
|  |  |  |    |  |  |  |  |  | 103  | 432.7649 | 863.5152 | 2 | 863.5116 | 0.0035 | 0 | 39.37 | 0.0065   | K | GILLYGK                    | A |
|  |  |  |    |  |  |  |  |  | 182  | 467.7732 | 933.5319 | 2 | 933.5284 | 0.0035 | 0 | 45.12 | 0.0035   | K | ITAFVVER                   | A |
|  |  |  |    |  |  |  |  |  | 263  | 508.2943 | 1014.574 | 2 | 1014.571 | 0.0032 | 0 | 42.1  | 0.011    | K | ELTGLNALK                  | N |
|  |  |  |    |  |  |  |  |  | 345  | 535.3105 | 1088.607 | 2 | 1088.604 | 0.0026 | 0 | 45.47 | 0.0018   | K | VAVNILNNGR                 | F |
|  |  |  |    |  |  |  |  |  | 346  | 535.3107 | 1088.607 | 2 | 1088.604 | 0.0028 | 0 | 65.73 | 1.60E-05 | K | VAVNILNNGR                 | F |
|  |  |  |    |  |  |  |  |  | 410  | 539.2922 | 1116.515 | 1 | 1116.566 | 0.0035 | 0 | 48.3  | 0.0025   | K | VEDEGLDK                   | F |
|  |  |  |    |  |  |  |  |  | 418  | 561.2972 | 1120.58  | 2 | 1120.576 | 0.0035 | 0 | 64.98 | 4.80E-05 | K | IFEGEAIK                   | I |
|  |  |  |    |  |  |  |  |  | 450  | 574.3104 | 1146.606 | 2 | 1146.603 | 0.003  | 0 | 75.39 | 4.30E-06 | R | DFEGANDILR                 | L |
|  |  |  |    |  |  |  |  |  | 478  | 586.3395 | 1170.665 | 2 | 1170.661 | 0.0037 | 1 | 47.13 | 0.0017   | K | TPIKDAATGAVK               | E |
|  |  |  |    |  |  |  |  |  | 511  | 598.2873 | 1194.56  | 2 | 1194.556 | 0.0043 | 0 | 42.26 | 0.0059   | R | FFEEVNDPAK                 | E |
|  |  |  |    |  |  |  |  |  | 532  | 607.8009 | 1213.587 | 2 | 1213.584 | 0.0044 | 0 | 76.07 | 0.0016   | K | FGM@AATLAGTM@K             | S |
|  |  |  |    |  |  |  |  |  | 553  | 615.7982 | 1229.582 | 2 | 1229.578 | 0.0035 | 0 | 67.83 | 1.40E-05 | R | FGM@AATLAGTM@K             | S |
|  |  |  |    |  |  |  |  |  | 595  | 641.3221 | 1280.63  | 2 | 1280.626 | 0.004  | 0 | 55.72 | 0.00033  | K | LFVALQGC@MDK               | G |
|  |  |  |    |  |  |  |  |  | 609  | 646.3195 | 1296.624 | 2 | 1296.621 | 0.0037 | 0 | 50.8  | 0.00093  | R | LFVALQGC@MDK               | G |
|  |  |  |    |  |  |  |  |  | 629  | 658.672  | 1315.75  | 3 | 1315.725 | 0.0046 | 0 | 53.76 | 0.00033  | K | GWNLGLDR                   | G |
|  |  |  |    |  |  |  |  |  | 664  | 452.9155 | 1355.725 | 3 | 1355.72  | 0.0049 | 1 | 32.22 | 0.05     | R | SFGVTHGLPEFK               | M |
|  |  |  |    |  |  |  |  |  | 691  | 708.8378 | 1415.661 | 2 | 1415.657 | 0.0041 | 0 | 36.84 | 0.017    | K | ASNTSEVFDGVK               | V |
|  |  |  |    |  |  |  |  |  | 692  | 708.8383 | 1415.662 | 2 | 1415.657 | 0.0052 | 0 | 65.89 | 2.10E-05 | K | ASNTSEVFDGVK               | V |
|  |  |  |    |  |  |  |  |  | 738  | 752.387  | 1502.759 | 2 | 1502.755 | 0.0042 | 0 | 66.05 | 2.80E-05 | K | NPFONVGLLMEAEAK            | N |
|  |  |  |    |  |  |  |  |  | 743  | 930.8646 | 1518.755 | 2 | 1518.75  | 0.0044 | 0 | 76.07 | 0.0016   | K | NPFONVGLLMEAEAK            | N |
|  |  |  |    |  |  |  |  |  | 754  | 773.8935 | 1545.772 | 2 | 1545.768 | 0.0049 | 0 | 76.84 | 2.30E-06 | K | VPSENVLEGVDDQFK            | V |
|  |  |  |    |  |  |  |  |  | 790  | 814.8495 | 1627.685 | 2 | 1627.679 | 0.0053 | 0 | 74.52 | 9.60E-07 | K | M@LC@DSCV@EATR             | I |
|  |  |  |    |  |  |  |  |  | 885  | 596.6402 | 1786.899 | 3 | 1786.895 | 0.0039 | 1 | 35.08 | 0.028    | K | NOALEKVEDDLOGLK            | I |
|  |  |  |    |  |  |  |  |  | 892  | 811.4955 | 1820.976 | 1 | 1820.971 | 0.0058 | 0 | 41.35 | 0.0031   | R | LADQ@YAM@VYVTR             | E |
|  |  |  |    |  |  |  |  |  | 885  | 917.8883 | 1833.782 | 2 | 1833.777 | 0.0051 | 0 | 46.8  | 0.00058  | K | VADEC@IQM@GM@GFM@K         | E |
|  |  |  |    |  |  |  |  |  | 892  | 622.6372 | 1864.89  | 3 | 1864.884 | 0.0055 | 1 | 34.26 | 0.032    | R | FFEEVNDPAKNDALEK           | V |
|  |  |  |    |  |  |  |  |  | 895  | 940.5178 | 1879.021 | 2 | 1879.016 | 0.0048 | 0 | 89.73 | 3.30E-08 | R | TGIGSGLSLGVHPLESR          | S |
|  |  |  |    |  |  |  |  |  | 896  | 627.3481 | 1879.022 | 3 | 1879.016 | 0.0081 | 0 | 80.82 | 2.80E-05 | R | TGIGSGLSLGVHPLESR          | S |
|  |  |  |    |  |  |  |  |  | 897  | 627.3483 | 1879.023 | 3 | 1879.016 | 0.0068 | 0 | 31.49 | 0.023    | K | TGIGSGLSLGVHPLESR          | S |
|  |  |  |    |  |  |  |  |  | 908  | 659.3512 | 1975.032 | 3 | 1975.026 | 0.0056 | 0 | 91.57 | 4.10E-08 | R | SGELAVQALDQFATVVEAK        | L |
|  |  |  |    |  |  |  |  |  | 909  | 659.3512 | 1975.032 | 3 | 1975.026 | 0.006  | 0 | 95.61 | 1.60E-08 | R | SGELAVQALDQFATVVEAK        | L |
|  |  |  |    |  |  |  |  |  | 1061 | 859.7837 | 2576.329 | 3 | 2576.324 | 0.0058 | 0 | 43.18 | 0.0016   | K | ELGAGFLQVPELGGGLSNTQYAR    | L |
|  |  |  |    |  |  |  |  |  | 247  | 470.7839 | 999.575  | 2 | 999.57   | 0.0033 | 0 | 48.45 | 0.0019   | R | VLVSGSNK                   | S |
|  |  |  |    |  |  |  |  |  | 477  | 586.3214 | 1170.628 | 2 | 1170.623 | 0.0038 | 0 | 58.89 | 0.00012  | K | VLDALGNADGK                | R |
|  |  |  |    |  |  |  |  |  | 602  | 644.3529 | 1286.691 | 2 | 1286.687 | 0.0042 | 0 | 57.12 | 0.00022  | K | HALIYDLSK                  | Q |
|  |  |  |    |  |  |  |  |  | 630  | 658.8767 | 1315.739 | 2 | 1315.735 | 0.0042 | 0 | 59.1  | 8.50E-05 | K | TSIAIDTINOK                | R |
|  |  |  |    |  |  |  |  |  | 638  | 664.3596 | 1326.705 | 2 | 1326.701 | 0.004  | 0 | 57.66 | 0.00017  | K | LYC@YVAIGK                 | V |
|  |  |  |    |  |  |  |  |  | 695  | 712.3425 | 1422.67  | 1 | 1422.666 | 0.0044 | 0 | 63.23 | 3.90E-05 | K | TGTA@S@SLEER               | I |
|  |  |  |    |  |  |  |  |  | 708  | 480.2892 | 1437.846 | 3 | 1437.842 | 0.0043 | 0 | 50.56 | 0.00018  | K | GIRPAINVLSVSR              | I |
|  |  |  |    |  |  |  |  |  | 709  | 719.9305 | 1437.846 | 2 | 1437.842 | 0.0048 | 0 | 42.21 | 0.0012   | K | GIRPAINVLSVSR              | I |
|  |  |  |    |  |  |  |  |  | 710  | 720.3401 | 1438.666 | 2 | 1438.661 | 0.0048 | 0 | 67.1  | 1.70E-05 | K | TGTAEM@S@SLEER             | V |
|  |  |  |    |  |  |  |  |  | 764  | 788.3887 | 1574.783 | 1 | 1574.779 | 0.004  | 0 | 40.82 | 0.0084   | R | ILGAG@V@DLEEGR             | I |
|  |  |  |    |  |  |  |  |  | 788  | 812.9518 | 1623.889 | 2 | 1623.883 | 0.0058 | 0 | 50.83 | 0.00037  | R | TGAVD@V@V@EELLGR           | V |
|  |  |  |    |  |  |  |  |  | 805  | 834.4033 | 1666.792 | 2 | 1666.787 | 0.0049 | 0 | 68.97 | 1.10E-05 | R | NVOAEM@V@FSSGLK            | G |
|  |  |  |    |  |  |  |  |  | 808  | 842.4019 | 1682.789 | 2 | 1682.782 | 0.007  | 0 | 79.78 | 8.10E-07 | R | NVOAEM@V@FSSGLK            | G |
|  |  |  | </ |  |  |  |  |  |      |          |          |   |          |        |   |       |          |   |                            |   |



|        |                                             |                                       |      |    |       |       |      |          |          |          |          |          |        |       |          |          |                     |                        |   |
|--------|---------------------------------------------|---------------------------------------|------|----|-------|-------|------|----------|----------|----------|----------|----------|--------|-------|----------|----------|---------------------|------------------------|---|
| Q08D2G | Dihydropolypyrrolinone-residue succinyltran | 119                                   | 4    | 4  | 48942 | 9.11  | 85   | 426.7889 | 851.5633 | 2        | 851.5593 | 0.004    | 0      | 30.88 | 0.0048   | R        | GLVVPVIR            | N                      |   |
|        |                                             |                                       |      |    |       |       | 526  | 595.3343 | 1188.654 | 2        | 1188.65  | 0.0039   | 0      | 33.84 | 0.043    | K        | VEGGTFLTLR          | K                      |   |
|        |                                             |                                       |      |    |       |       | 794  | 727.8356 | 1453.657 | 2        | 1453.651 | 0.0059   | 0      | 71.25 | 5.30E-06 | R        | NVETMNVADIER        | T                      |   |
|        |                                             |                                       |      |    |       |       | 1129 | 729.7179 | 2186.132 | 3        | 2186.122 | 0.01     | 0      | 42.29 | 0.0032   | K        | ASAFALQEGPVVNAIDDKT | E                      |   |
|        |                                             |                                       |      |    |       |       |      |          |          |          |          |          |        |       |          |          |                     |                        |   |
| 19     | Q03265                                      | ATP synthase subunit alpha, mitochond | 2436 | 72 | 33    | 59716 | 9.22 | 90       | 423.5297 | 844.5049 | 2        | 844.5018 | 0.003  | 0     | 41.02    | 0.013    | R                   | STVAQLVK               | R |
|        |                                             |                                       |      |    |       |       |      | 106      | 430.7563 | 859.498  | 2        | 859.4949 | 0.0031 | 0     | 47.01    | 0.0034   | R                   | QMSLLLR                | R |
|        |                                             |                                       |      |    |       |       |      | 129      | 438.7535 | 875.4924 | 2        | 875.4899 | 0.0026 | 0     | 43.73    | 0.0073   | R                   | QMSLLLR                | R |
|        |                                             |                                       |      |    |       |       |      | 154      | 446.7485 | 891.4825 | 2        | 891.4814 | 0.011  | 0     | 39.77    | 0.017    | K                   | LELAQYR                | E |
|        |                                             |                                       |      |    |       |       |      | 155      | 446.7494 | 891.4843 | 2        | 891.4814 | 0.0029 | 0     | 42.45    | 0.01     | K                   | LELAQYR                | E |
|        |                                             |                                       |      |    |       |       |      | 167      | 452.2537 | 902.4568 | 2        | 902.4531 | 0.0037 | 0     | 40.12    | 0.02     | R                   | EPMQTGK                | A |
|        |                                             |                                       |      |    |       |       |      | 255      | 500.7939 | 999.5733 | 2        | 999.5713 | 0.002  | 0     | 75.46    | 3.70E-06 | R                   | VLSIGDGIAR             | V |
|        |                                             |                                       |      |    |       |       |      | 256      | 500.7941 | 999.5736 | 2        | 999.5713 | 0.0023 | 0     | 55.1     | 0.00041  | R                   | VLSIGDGIAR             | V |
|        |                                             |                                       |      |    |       |       |      | 257      | 500.7942 | 999.5739 | 2        | 999.5713 | 0.0026 | 0     | 39.68    | 0.014    | R                   | VLSIGDGIAR             | V |
|        |                                             |                                       |      |    |       |       |      | 258      | 500.7946 | 999.5746 | 2        | 999.5713 | 0.0033 | 0     | 58.17    | 0.0002   | R                   | VLSIGDGIAR             | V |
|        |                                             |                                       |      |    |       |       |      | 262      | 501.3099 | 1000.605 | 2        | 1000.603 | 0.0024 | 1     | 31.36    | 0.049    | R                   | RSTVAQLVK              | R |
|        |                                             |                                       |      |    |       |       |      | 295      | 5130.189 | 1025.589 | 2        | 1025.587 | 0.002  | 0     | 33.67    | 0.025    | K                   | AVDSVLPPIGR            | G |
|        |                                             |                                       |      |    |       |       |      | 297      | 513.8022 | 1025.59  | 2        | 1025.587 | 0.003  | 0     | 46.22    | 0.0014   | K                   | AVDSVLPPIGR            | G |
|        |                                             |                                       |      |    |       |       |      | 457      | 575.3123 | 1148.61  | 2        | 1148.608 | 0.0024 | 1     | 35.25    | 0.044    | R                   | GYLDKLEPK              | I |
|        |                                             |                                       |      |    |       |       |      | 486      | 586.3209 | 1170.627 | 2        | 1170.625 | 0.0028 | 0     | 80.43    | 1.10E-06 | R                   | VVDALGNADGK            | G |
|        |                                             |                                       |      |    |       |       |      | 488      | 586.3212 | 1170.628 | 2        | 1170.625 | 0.0035 | 0     | 76.46    | 2.80E-06 | R                   | VVDALGNADGK            | G |
|        |                                             |                                       |      |    |       |       |      | 489      | 586.3213 | 1170.628 | 2        | 1170.625 | 0.0037 | 0     | 68.79    | 1.60E-05 | R                   | VVDALGNADGK            | G |
|        |                                             |                                       |      |    |       |       |      | 638      | 644.3525 | 1286.691 | 2        | 1286.687 | 0.0035 | 0     | 36.51    | 0.029    | K                   | HALIYDLSK              | K |
|        |                                             |                                       |      |    |       |       |      | 639      | 644.3526 | 1286.691 | 2        | 1286.687 | 0.0036 | 0     | 62.62    | 6.80E-05 | K                   | HALIYDLSK              | K |
|        |                                             |                                       |      |    |       |       |      | 640      | 644.3527 | 1286.691 | 2        | 1286.687 | 0.0037 | 0     | 44.51    | 0.0044   | K                   | HALIYDLSK              | K |
|        |                                             |                                       |      |    |       |       |      | 641      | 644.3528 | 1286.691 | 2        | 1286.687 | 0.004  | 0     | 63.9     | 5.10E-05 | K                   | HALIYDLSK              | K |
|        |                                             |                                       |      |    |       |       |      | 671      | 658.9768 | 1315.735 | 2        | 1315.735 | 0.0044 | 0     | 82.26    | 3.70E-07 | K                   | TSIAIDTIINQK           | Q |
|        |                                             |                                       |      |    |       |       |      | 677      | 664.3596 | 1326.705 | 2        | 1326.701 | 0.0041 | 0     | 51.66    | 0.00067  | K                   | LYCIVYAIGQK            | R |
|        |                                             |                                       |      |    |       |       |      | 678      | 664.3597 | 1326.705 | 2        | 1326.701 | 0.0044 | 0     | 80.48    | 8.30E-07 | K                   | LYCIVYAIGQK            | R |
|        |                                             |                                       |      |    |       |       |      | 695      | 668.8449 | 1335.675 | 2        | 1335.671 | 0.0042 | 0     | 34.01    | 0.045    | K                   | EIVTNFLAGFEP           | - |
|        |                                             |                                       |      |    |       |       |      | 745      | 712.343  | 1422.671 | 2        | 1422.666 | 0.0053 | 0     | 87.22    | 1.70E-07 | K                   | TGTAEMSSLEER           | I |
|        |                                             |                                       |      |    |       |       |      | 746      | 712.3431 | 1422.672 | 2        | 1422.666 | 0.0056 | 0     | 96.04    | 2.30E-08 | K                   | TGTAEMSSLEER           | I |
|        |                                             |                                       |      |    |       |       |      | 762      | 480.2892 | 1437.846 | 3        | 1437.842 | 0.0042 | 0     | 48.29    | 0.0003   | K                   | GIRPAINVGLSVSR         | V |
|        |                                             |                                       |      |    |       |       |      | 763      | 480.2892 | 1437.846 | 3        | 1437.842 | 0.0043 | 0     | 30.91    | 0.016    | K                   | GIRPAINVGLSVSR         | V |
|        |                                             |                                       |      |    |       |       |      | 764      | 719.9304 | 1437.846 | 2        | 1437.842 | 0.0047 | 0     | 30.62    | 0.017    | K                   | GIRPAINVGLSVSR         | V |
|        |                                             |                                       |      |    |       |       |      | 765      | 719.9305 | 1437.846 | 2        | 1437.842 | 0.0048 | 0     | 35.1     | 0.0062   | K                   | GIRPAINVGLSVSR         | V |
|        |                                             |                                       |      |    |       |       |      | 766      | 719.9306 | 1437.847 | 2        | 1437.842 | 0.0051 | 0     | 58       | 3.20E-05 | K                   | GIRPAINVGLSVSR         | V |
|        |                                             |                                       |      |    |       |       |      | 767      | 720.3397 | 1438.665 | 2        | 1438.661 | 0.0039 | 0     | 96.44    | 2.00E-08 | K                   | TGTAEMSSLEER           | I |
|        |                                             |                                       |      |    |       |       |      | 768      | 720.3403 | 1438.666 | 2        | 1438.661 | 0.005  | 0     | 49.24    | 0.001    | K                   | TGTAEMSSLEER           | I |
|        |                                             |                                       |      |    |       |       |      | 775      | 728.4072 | 1454.8   | 2        | 1454.796 | 0.0044 | 1     | 71.17    | 4.70E-06 | K                   | KLYCIYVAIGQK           | R |
|        |                                             |                                       |      |    |       |       |      | 798      | 691.621  | 1471.841 | 3        | 1471.836 | 0.0053 | 0     | 58.3     | 9.00E-05 | K                   | TSIAIDTIINQK           | R |
|        |                                             |                                       |      |    |       |       |      | 789      | 736.9286 | 1471.843 | 2        | 1471.836 | 0.0068 | 0     | 47.32    | 0.00071  | K                   | TSIAIDTIINQK           | R |
|        |                                             |                                       |      |    |       |       |      | 793      | 495.2758 | 1482.806 | 3        | 1482.802 | 0.0039 | 1     | 38.53    | 0.0086   | K                   | LYCIVYAIGQK            | F |
|        |                                             |                                       |      |    |       |       |      | 827      | 518.5859 | 1552.736 | 3        | 1552.731 | 0.0048 | 0     | 38.3     | 0.014    | R                   | EAYPGDVFYLSR           | L |
|        |                                             |                                       |      |    |       |       |      | 829      | 777.3757 | 1552.737 | 2        | 1552.731 | 0.0059 | 0     | 65.85    | 2.60E-05 | R                   | EAYPGDVFYLSR           | L |
|        |                                             |                                       |      |    |       |       |      | 834      | 788.3984 | 1574.783 | 2        | 1574.779 | 0.0044 | 0     | 98.07    | 1.60E-08 | R                   | ILGADTSVDELETR         | V |
|        |                                             |                                       |      |    |       |       |      | 835      | 788.3988 | 1574.783 | 2        | 1574.779 | 0.0043 | 0     | 66.13    | 2.30E-05 | R                   | ILGADTSVDELETR         | V |
|        |                                             |                                       |      |    |       |       |      | 836      | 788.3992 | 1574.784 | 2        | 1574.779 | 0.0051 | 0     | 131.49   | 6.30E-12 | R                   | ILGADTSVDELETR         | V |
|        |                                             |                                       |      |    |       |       |      | 837      | 788.3997 | 1574.785 | 2        | 1574.779 | 0.006  | 0     | 56.87    | 0.00019  | R                   | ILGADTSVDELETR         | V |
|        |                                             |                                       |      |    |       |       |      | 838      | 788.4001 | 1574.786 | 2        | 1574.779 | 0.0068 | 0     | 55.52    | 0.00028  | R                   | ILGADTSVDELETR         | V |
|        |                                             |                                       |      |    |       |       |      | 839      | 789.4354 | 1576.856 | 2        | 1576.85  | 0.0062 | 1     | 39.43    | 0.0069   | K                   | LKEIVTNFLAGFEP         | - |
|        |                                             |                                       |      |    |       |       |      | 840      | 789.4355 | 1576.857 | 2        | 1576.85  | 0.0065 | 1     | 49.25    | 0.00072  | K                   | LKEIVTNFLAGFEP         | - |
|        |                                             |                                       |      |    |       |       |      | 866      | 542.3032 | 1623.888 | 3        | 1623.883 | 0.0046 | 0     | 56.01    | 0.0001   | R                   | TGAIIVPVGELLGR         | V |
|        |                                             |                                       |      |    |       |       |      | 868      | 812.9518 | 1623.889 | 2        | 1623.883 | 0.0058 | 0     | 75.32    | 1.30E-06 | R                   | TGAIIVPVGELLGR         | V |
|        |                                             |                                       |      |    |       |       |      | 869      | 812.9519 | 1623.889 | 2        | 1623.883 | 0.0068 | 0     | 59.78    | 5.70E-05 | R                   | TGAIIVPVGELLGR         | V |
|        |                                             |                                       |      |    |       |       |      | 870      | 812.9525 | 1623.89  | 2        | 1623.883 | 0.0072 | 0     | 33.87    | 0.019    | R                   | TGAIIVPVGELLGR         | V |
|        |                                             |                                       |      |    |       |       |      | 893      | 556.6044 | 1666.791 | 3        | 1666.787 | 0.0041 | 0     | 52.2     | 0.00055  | R                   | NVOAEEVVFSSGLK         | G |
|        |                                             |                                       |      |    |       |       |      | 894      | 834.4034 | 1666.792 | 2        | 1666.787 | 0.0051 | 0     | 107.63   | 1.50E-09 | R                   | NVOAEEVVFSSGLK         | G |
|        |                                             |                                       |      |    |       |       |      | 901      | 561.9363 | 1682.787 | 3        | 1682.782 | 0.0049 | 0     | 51.21    | 0.00028  | R                   | NVOAEEVVFSSGLK         | G |
|        |                                             |                                       |      |    |       |       |      | 902      | 842.4012 | 1682.788 | 2        | 1682.782 | 0.0057 | 0     | 44.42    | 0.0026   | R                   | NVOAEEVVFSSGLK         | G |
|        |                                             |                                       |      |    |       |       |      | 903      | 842.4013 | 1682.788 | 2        | 1682.782 | 0.0059 | 0     | 98.66    | 1.00E-08 | R                   | NVOAEEVVFSSGLK         | G |
|        |                                             |                                       |      |    |       |       |      | 935      | 570.9858 | 1709.936 | 3        | 1709.931 | 0.0043 | 1     | 39.18    | 0.0042   | R                   | VVDALGNADGKPIGSK       | T |
|        |                                             |                                       |      |    |       |       |      | 936      | 850.5732 | 1709.936 | 2        | 1709.931 | 0.0046 | 1     | 58.72    | 4.90E-05 | R                   | VVDALGNADGKPIGSK       | T |
|        |                                             |                                       |      |    |       |       |      | 937      | 570.9859 | 1709.936 | 3        | 1709.931 | 0.0047 | 1     | 29.34    | 0.039    | R                   | VVDALGNADGKPIGSK       | T |
|        |                                             |                                       |      |    |       |       |      | 998      | 594.3372 | 1779.99  | 3        | 1779.984 | 0.0053 | 1     | 28.94    | 0.039    | K                   | RTGAIIVPVGELLGR        | V |
|        |                                             |                                       |      |    |       |       |      | 1122     | 1052.526 | 2103.037 | 2        | 2103.031 | 0.0065 | 0     | 72.53    | 3.40E-06 | K                   | GMSLNLEPNVGVVFNQDK     | L |
|        |                                             |                                       |      |    |       |       |      | 1123     | 702.0198 | 2103.038 | 2        | 2103.031 | 0.0068 | 0     | 47.37    | 0.0011   | K                   | GMSLNLEPNVGVVFNQDK     | L |
|        |                                             |                                       |      |    |       |       |      | 1124     | 1060.523 | 2119.026 | 2        | 2119.026 | 0.0062 | 0     | 75.05    | 1.90E-06 | K                   | GM@SLNLEPNVGVVFNQDK    | L |
|        |                                             |                                       |      |    |       |       |      | 1125     | 707.3514 | 2119.033 | 2        | 2119.026 | 0.0069 | 0     | 53.1     | 0.0003   | K                   | GM@SLNLEPNVGVVFNQDK    | L |
|        |                                             |                                       |      |    |       |       |      | 1126     | 1060.524 | 2119.034 | 2        | 2119.026 | 0.008  | 0     | 43.69    | 0.0026   | K                   | GM@SLNLEPNVGVVFNQDK    | L |
|        |                                             |                                       |      |    |       |       |      | 1249     | 1163.084 | 2324.152 | 2        | 2324.147 | 0.0054 | 0     | 54.85    | 0.00018  | K                   | QGOYSPM@AIEEOVAVIYAGVR | G |
|        |                                             |                                       |      |    |       |       |      | 1250     | 775.7252 | 2324.154 | 3        | 2324.147 | 0.0066 | 0     | 52.01    | 0.00033  | K                   | QGOYSPM@AIEEOVAVIYAGVR | G |
|        |                                             |                                       |      |    |       |       |      | 1251     | 775.7256 | 2324.155 | 3        | 2324.147 | 0.0079 | 0     | 80.94    | 4.10E-07 | K                   | QGOYSPM@AIEEOVAVIYAGVR | G |
|        |                                             |                                       |      |    |       |       |      | 1259     | 780.0629 | 2337.167 | 3        | 2337.16  | 0.0067 | 0     | 71.32    | 4.00E-06 | R                   | EVAFAFQFSDSLDAAATQQLSR | G |
|        |                                             |                                       |      |    |       |       |      | 1260     | 1169.591 | 2337.167 | 2        | 2337.16  | 0.0068 | 0     | 87.78    | 9.10E-08 | R                   | EVAFAFQFSDSLDAAATQQLSR | G |
|        |                                             |                                       |      |    |       |       |      | 1273     | 603.3232 | 2409.264 | 4        | 2409.255 | 0.0083 | 0     | 36.76    | 0.0068   | K                   | FENAFVSHVISHOGLSLGNIR  | S |
|        |                                             |                                       |      |    |       |       |      | 1274     | 804.0853 | 2409.264 | 3        | 2409.255 | 0.0089 | 0     | 55.09    | 9.40E-05 | K                   | FENAFVSHVISHOGLSLGNIR  | S |
|        |                                             |                                       |      |    |       |       |      | 45       | 397.512  | 792.4161 | 2        | 792.413  | 0.0031 | 0     | 39.09    | 0.0031   | K                   | VFDVLSK                | A |
|        |                                             |                                       |      |    |       |       |      | 47       | 418.7311 | 835.4477 | 2        | 835.444  | 0.0038 | 0     | 46.24    | 0.0045   | R                   | LVEIAQVPK              | A |
|        |                                             |                                       |      |    |       |       |      | 251      | 498.809  | 995.6035 | 2        | 995.6015 | 0.002  | 0     | 60.7     | 2.90E-05 | R                   | LVEIAQVPK              | A |
|        |                                             |                                       |      |    |       |       |      | 252      | 498.8094 | 995.6042 | 2        | 995.6015 | 0.0026 | 0     | 74.83    | 1.10E-06 | R                   | LVEIAQVPK              | A |
|        |                                             |                                       |      |    |       |       |      | 301      | 514.7628 | 1027.511 | 2        | 1027.508 | 0.0019 | 0     | 36.25    | 0.03     | K                   | IYTFNQR                | Y |
|        |                                             |                                       |      |    |       |       |      | 302      | 514.7627 | 1027.511 | 2        | 1027.509 | 0.0022 | 0     | 36.22    | 0.029    | K                   | IYTFNQR                | Y |
|        |                                             |                                       |      |    |       |       |      | 304      | 514.7628 | 1027.511 | 2        | 1027.509 | 0.0024 | 0     | 42.63    | 0.0066   | K                   | IYTFNQR                | Y |
|        |                                             |                                       |      |    |       |       |      | 355      | 527.2649 | 1052.515 | 2        | 1052.514 | 0.0014 | 0     | 45.13    | 0.004    | K                   | GGTLTOYEGK             | L |
|        |                                             |                                       |      |    |       |       |      | 357      | 527.2653 | 1052.516 | 2        | 1052.514 | 0.0021 | 0     | 37.87    | 0.022    | K                   | GGTLTOYEGK             | L |
|        |                                             |                                       |      |    |       |       |      | 620      | 597.7858 | 1193.556 | 2        | 1193.553 | 0.0031 | 0     | 59.7     | 0.001    | K                   | LNGGLTSM@GCK           | D |
|        |                                             |                                       |      |    |       |       |      | 539      | 605.7834 | 1209.552 | 2        | 1209.548 | 0.0041 | 0     | 34.47    | 0.033    | K                   | LNGGLTSM@GCK           | D |
|        |                                             |                                       |      |    |       |       |      | 565      | 613.3815 | 1224.748 | 2        | 1224.744 | 0.0043 | 0     | 43.15    | 0.00076  | R                   | INKESLPIAK             | G |
|        |                                             |                                       |      |    |       |       |      | 599      | 628.788  | 1255.562 | 2        | 1255.558 | 0.0038 | 0     | 34.39    | 0.025    | R                   | C'EFVMEVYTNK           | T |
|        |                                             |                                       |      |    |       |       |      | 601      | 628.7892 | 1255.562 | 2        | 1255.558 | 0.0042 | 0     | 48.11    | 0.0011   | R                   | C'EFVMEVYTNK           | T |
|        |                                             |                                       |      |    |       |       |      | 601      | 628.7883 | 1255.562 | 2        | 1255.558 | 0.0044 | 0     | 35.69    | 0.019    | R                   | C'EFVMEVYTNK           |   |



|        |                                        |     |    |    |       |      |          |           |          |        |   |        |          |   |                                |   |
|--------|----------------------------------------|-----|----|----|-------|------|----------|-----------|----------|--------|---|--------|----------|---|--------------------------------|---|
|        |                                        |     |    |    |       | 694  | 627.8034 | 1253.5922 | 1253.589 | 0.0035 | 1 | 57.12  | 0.00021  | K | TSFSGSKDRED                    | I |
|        |                                        |     |    |    |       | 895  | 696.2687 | 1390.523  | 1390.518 | 0.0052 | 0 | 47.72  | 0.00011  | K | HESGQC'TPC'R                   | I |
|        |                                        |     |    |    |       | 1165 | 826.3876 | 1650.761  | 1650.756 | 0.0047 | 0 | 86.59  | 1.60E-07 | K | YLVVNADEGEPTGCK                | D |
|        |                                        |     |    |    |       | 1166 | 826.3879 | 1650.761  | 1650.756 | 0.0053 | 0 | 91.35  | 5.30E-08 | K | YLVVNADEGEPTGCK                | D |
|        |                                        |     |    |    |       | 1167 | 826.3879 | 1650.761  | 1650.756 | 0.0053 | 0 | 72.99  | 3.70E-06 | K | YLVVNADEGEPTGCK                | D |
|        |                                        |     |    |    |       | 1217 | 570.9549 | 1709.843  | 1709.837 | 0.0056 | 0 | 85.15  | 2.70E-07 | R | GEFYNEASNLQVAVR                | E |
|        |                                        |     |    |    |       | 1218 | 855.9287 | 1709.843  | 1709.837 | 0.0056 | 0 | 87.17  | 1.70E-07 | R | GEFYNEASNLQVAVR                | E |
|        |                                        |     |    |    |       | 1219 | 855.9291 | 1709.844  | 1709.837 | 0.0065 | 0 | 91.89  | 5.40E-08 | R | GEFYNEASNLQVAVR                | E |
|        |                                        |     |    |    |       | 1262 | 892.3913 | 1762.768  | 1762.762 | 0.0059 | 0 | 78.67  | 4.80E-07 | K | NAC'GSDYDFDFVYVR               | G |
|        |                                        |     |    |    |       | 1263 | 892.3914 | 1762.768  | 1762.762 | 0.0062 | 0 | 82.37  | 2.10E-07 | K | NAC'GSDYDFDFVYVR               | G |
|        |                                        |     |    |    |       | 1264 | 588.597  | 1762.769  | 1762.762 | 0.007  | 0 | 58.31  | 5.00E-05 | K | NAC'GSDYDFDFVYVR               | G |
|        |                                        |     |    |    |       | 1289 | 893.9547 | 1785.895  | 1785.89  | 0.0052 | 0 | 49.55  | 0.00096  | K | GDARPAEIDSLWEISK               | O |
|        |                                        |     |    |    |       | 1345 | 961.9512 | 1921.888  | 1921.884 | 0.0038 | 1 | 41.37  | 0.0041   | K | YLVVNADEGEPTGCK                | O |
|        |                                        |     |    |    |       | 1346 | 641.6269 | 1921.890  | 1921.884 | 0.0049 | 0 | 38.47  | 0.0081   | K | YLVVNADEGEPTGCK                | O |
|        |                                        |     |    |    |       | 1398 | 690.0039 | 2066.99   | 2066.983 | 0.0069 | 0 | 56.01  | 0.00017  | R | GAGAYIC'GEETALIESIEGK          | E |
|        |                                        |     |    |    |       | 1399 | 1034.502 | 2066.99   | 2066.983 | 0.0071 | 0 | 105.78 | 1.80E-09 | R | GAGAYIC'GEETALIESIEGK          | O |
|        |                                        |     |    |    |       | 1400 | 1034.503 | 2066.991  | 2066.983 | 0.0078 | 0 | 95.75  | 1.70E-08 | R | GAGAYIC'GEETALIESIEGK          | O |
|        |                                        |     |    |    |       | 1686 | 872.4038 | 2613.402  | 2613.392 | 0.0091 | 0 | 28.98  | 0.021    | K | HAGGVGTGWNLLAVIPGSGSTPLPK      | S |
|        |                                        |     |    |    |       | 1687 | 872.4111 | 2613.402  | 2613.392 | 0.01   | 0 | 30.57  | 0.014    | K | HAGGVGTGWNLLAVIPGSGSTPLPK      | S |
|        |                                        |     |    |    |       | 1698 | 879.7672 | 2636.28   | 2636.273 | 0.0071 | 1 | 55.3   | 0.00012  | K | LFNISHVNHPC'TVEEEMSVPLK        | E |
|        |                                        |     |    |    |       | 1708 | 885.0992 | 2652.276  | 2652.268 | 0.0083 | 0 | 42.46  | 0.0023   | K | LFNISHVNHPC'TVEEEMSVPLK        | E |
|        |                                        |     |    |    |       | 1709 | 885.0997 | 2652.277  | 2652.268 | 0.0093 | 0 | 38.24  | 0.0061   | K | LFNISHVNHPC'TVEEEMSVPLK        | E |
|        |                                        |     |    |    |       | 1767 | 811.4006 | 3241.573  | 3241.567 | 0.0066 | 0 | 54.92  | 8.90E-05 | K | SVCTETVLM@DFDALVOAQTGLGTAVIWMR | S |
|        |                                        |     |    |    |       | 1768 | 1081.532 | 3241.574  | 3241.567 | 0.0072 | 0 | 76.96  | 5.90E-07 | K | SVCTETVLM@DFDALVOAQTGLGTAVIWMR | S |
| Q1XH17 | Tripartite motif-containing protein 72 | 364 | 17 | 15 | 52783 | 146  | 441.7304 | 881.4463  | 881.4429 | 0.0034 | 0 | 36.1   | 0.033    | K | FC'LVTSR                       | L |
|        |                                        |     |    |    |       | 293  | 505.289  | 1008.562  | 1008.56  | 0.003  | 0 | 44.44  | 0.003    | K | ILEAHVEAK                      | V |
|        |                                        |     |    |    |       | 296  | 507.274  | 1012.58   | 1012.578 | 0.0025 | 1 | 41.92  | 0.005    | R | VRGAGVVALR                     | L |
|        |                                        |     |    |    |       | 331  | 520.3    | 1038.586  | 1038.582 | 0.0034 | 0 | 40.97  | 0.0064   | R | LLPAEAQAR                      | V |
|        |                                        |     |    |    |       | 409  | 542.3312 | 1082.648  | 1082.645 | 0.0031 | 1 | 30.71  | 0.033    | R | LKTLQPOK                       | M |
|        |                                        |     |    |    |       | 557  | 583.7612 | 1165.508  | 1165.504 | 0.0037 | 0 | 32.31  | 0.04     | K | MOLQEAQMR                      | K |
|        |                                        |     |    |    |       | 585  | 591.7587 | 1181.503  | 1181.499 | 0.0037 | 0 | 45.22  | 0.0015   | K | MOLQEAQMR                      | K |
|        |                                        |     |    |    |       | 705  | 631.3136 | 1262.615  | 1262.608 | 0.0049 | 0 | 73.13  | 6.10E-06 | K | WALGSIWAADMSR                  | R |
|        |                                        |     |    |    |       | 870  | 684.8476 | 1367.681  | 1367.676 | 0.0052 | 0 | 45.11  | 0.0032   | R | MIFLAALLESDDR                  | R |
|        |                                        |     |    |    |       | 1030 | 506.2516 | 1515.733  | 1515.729 | 0.0045 | 0 | 33.38  | 0.039    | R | TLVC'GVC'ASLGSRR               | G |
|        |                                        |     |    |    |       | 1031 | 758.874  | 1515.734  | 1515.729 | 0.0049 | 0 | 78.35  | 1.40E-06 | R | TLVC'GVC'ASLGSRR               | G |
|        |                                        |     |    |    |       | 1058 | 776.4075 | 1550.801  | 1550.794 | 0.0065 | 0 | 65.26  | 2.40E-05 | R | ELSSNSLYLEQLR                  | Q |
|        |                                        |     |    |    |       | 1331 | 626.3315 | 1875.973  | 1875.965 | 0.0074 | 0 | 35.07  | 0.021    | K | VLKQKQTEFLMK                   | F |
|        |                                        |     |    |    |       | 1332 | 631.6627 | 1891.966  | 1891.96  | 0.006  | 0 | 36.78  | 0.015    | K | VLEEVADKPTQFELM8K              | F |
|        |                                        |     |    |    |       | 1358 | 976.0306 | 1950.047  | 1950.042 | 0.0045 | 0 | 39.42  | 0.0041   | K | TVAVLEHQLVVEEIVTR              | Q |
|        |                                        |     |    |    |       | 1357 | 651.0239 | 1950.05   | 1950.042 | 0.0077 | 0 | 48.92  | 0.00045  | K | TVAVLEHQLVVEEIVTR              | Q |
|        |                                        |     |    |    |       | 1736 | 933.4749 | 2737.403  | 2736.992 | 0.0073 | 0 | 48.95  | 0.00083  | R | ALMSEVLTDFPSSAHPFLVSSGSR       | Q |
| Q7TQ48 | Sarcalumenin                           | 336 | 12 | 10 | 99123 | 205  | 468.7862 | 935.5578  | 935.5552 | 0.0026 | 0 | 45.14  | 0.0013   | R | IHALVDR                        | R |
|        |                                        |     |    |    |       | 706  | 632.3148 | 1262.615  | 1262.611 | 0.0039 | 0 | 43.26  | 0.0057   | K | ADNLATQMLMR                    | V |
|        |                                        |     |    |    |       | 729  | 640.3123 | 1278.61   | 1278.606 | 0.0041 | 0 | 37.12  | 0.02     | K | ADNLATQMLMR                    | V |
|        |                                        |     |    |    |       | 758  | 648.3095 | 1294.605  | 1294.601 | 0.0035 | 0 | 38.4   | 0.014    | K | ADNLATQMLMR                    | V |
|        |                                        |     |    |    |       | 824  | 667.345  | 1332.676  | 1332.671 | 0.0048 | 0 | 72.07  | 8.40E-06 | R | TIEGSIWAADMSR                  | V |
|        |                                        |     |    |    |       | 977  | 730.8937 | 1459.773  | 1459.767 | 0.0058 | 0 | 61.12  | 8.00E-05 | R | VTFVDTPIGIIER                  | K |
|        |                                        |     |    |    |       | 1142 | 813.4164 | 1624.818  | 1624.813 | 0.0053 | 0 | 39.1   | 0.01     | K | STMINYLLGLEDR                  | Y |
|        |                                        |     |    |    |       | 1146 | 814.9165 | 1627.819  | 1627.813 | 0.0051 | 1 | 58.19  | 0.00012  | K | DHVEDPDKYIFK                   | T |
|        |                                        |     |    |    |       | 1208 | 566.3342 | 1695.981  | 1695.977 | 0.0036 | 0 | 28.53  | 0.024    | R | AITQELSLSSIGLQK                | L |
|        |                                        |     |    |    |       | 1209 | 848.999  | 1695.984  | 1695.977 | 0.0064 | 0 | 29.73  | 0.015    | R | AITQELSLSSIGLQK                | N |
|        |                                        |     |    |    |       | 1339 | 638.6671 | 1912.979  | 1912.974 | 0.0052 | 0 | 34.53  | 0.024    | K | EEISLEDLNQVIENR                | L |
|        |                                        |     |    |    |       | 1340 | 957.4973 | 1912.98   | 1912.974 | 0.0058 | 0 | 91.37  | 4.90E-08 | K | EEISLEDLNQVIENR                | L |
|        |                                        |     |    |    |       | 448  | 546.3025 | 1106.589  | 1106.587 | 0.0031 | 0 | 39.67  | 0.013    | R | WSYGAQVILR                     | V |
|        |                                        |     |    |    |       | 579  | 589.0022 | 1176.582  | 1176.582 | 0.0043 | 0 | 47.53  | 0.0026   | R | VTFVDTPIGIIER                  | F |
|        |                                        |     |    |    |       | 754  | 646.8265 | 1291.639  | 1291.634 | 0.0042 | 0 | 55.28  | 0.00038  | R | IC'DGVGVGAGIR                  | F |
|        |                                        |     |    |    |       | 791  | 659.8265 | 1317.635  | 1317.635 | 0.0037 | 0 | 33.69  | 0.045    | K | SSLSHAM@VIDSR                  | N |
|        |                                        |     |    |    |       | 1284 | 890.4661 | 1778.918  | 1778.912 | 0.0053 | 1 | 53.73  | 0.0003   | R | TKDDIIC'EIEGVFK                | A |
|        |                                        |     |    |    |       | 1313 | 911.4377 | 1820.861  | 1820.855 | 0.0059 | 0 | 53.53  | 0.00033  | R | LELNYC'IPM@GVGGDR              | I |
|        |                                        |     |    |    |       | 1319 | 919.4354 | 1836.856  | 1836.85  | 0.0063 | 0 | 59.23  | 8.00E-05 | R | LELNYC'IPM@GVGGDR              | I |
|        |                                        |     |    |    |       | 1421 | 702.0115 | 2103.013  | 2103.006 | 0.0066 | 0 | 70.57  | 5.80E-06 | K | ETSYGLSFFKPPGFNER              | N |
|        |                                        |     |    |    |       | 21   | 385.744  | 769.4735  | 769.4698 | 0.0031 | 0 | 32.05  | 0.05     | K | VIQVPSK                        | K |
|        |                                        |     |    |    |       | 390  | 534.8439 | 1067.673  | 1067.67  | 0.0038 | 0 | 48.4   | 0.00024  | K | LILPGLSSR                      | K |
|        |                                        |     |    |    |       | 415  | 544.3047 | 1086.595  | 1086.592 | 0.0029 | 0 | 65.91  | 4.70E-05 | K | VIKSEIAK                       | C |
|        |                                        |     |    |    |       | 639  | 405.5497 | 1213.627  | 1213.62  | 0.0069 | 0 | 38.45  | 0.015    | K | SPOYSQVHVR                     | L |
|        |                                        |     |    |    |       | 666  | 617.3295 | 1232.644  | 1232.64  | 0.0043 | 0 | 66.87  | 2.60E-05 | R | IYVVVDGSEPR                    | A |
|        |                                        |     |    |    |       | 819  | 665.8981 | 1329.782  | 1329.777 | 0.0047 | 0 | 57.48  | 3.40E-05 | R | LAGOIFGLSSVR                   | V |
|        |                                        |     |    |    |       | 1338 | 363.4611 | 1594.908  | 1594.9   | 0.0073 | 0 | 76.14  | 1.80E-06 | R | NTQD'YDFLAVTDVDPK              | T |
|        |                                        |     |    |    |       | 221  | 482.2881 | 962.5216  | 962.5185 | 0.0031 | 0 | 47.11  | 0.0033   | K | YNLGLDR                        | T |
|        |                                        |     |    |    |       | 297  | 507.2714 | 1012.528  | 1012.526 | 0.002  | 0 | 37     | 0.024    | K | ALASLM@TYK                     | C |
|        |                                        |     |    |    |       | 405  | 540.292  | 1078.569  | 1078.566 | 0.0036 | 0 | 62.13  | 9.10E-05 | R | TAAYVNAIEK                     | V |
|        |                                        |     |    |    |       | 645  | 610.3127 | 1218.611  | 1218.607 | 0.0041 | 0 | 39.03  | 0.02     | K | C'AVVDVFFGGAK                  | V |
|        |                                        |     |    |    |       | 101  | 782.4024 | 1582.78   | 1582.784 | 0.004  | 0 | 77.42  | 1.60E-06 | K | IIAEGVNPFTFEADK                | I |
|        |                                        |     |    |    |       | 1254 | 583.6367 | 1747.888  | 1747.883 | 0.0053 | 0 | 40.93  | 0.0074   | K | TFVVGQGVNGLHSMR                | Y |
|        |                                        |     |    |    |       | 1267 | 588.9681 | 1763.883  | 1763.878 | 0.0048 | 0 | 52.91  | 0.00051  | K | TFVVGQGVNGLHSMR                | R |
|        |                                        |     |    |    |       | 1341 | 958.4669 | 1914.919  | 1914.915 | 0.0047 | 0 | 35.45  | 0.021    | K | GFIFGIGDVPAPDMSTGER            | E |
|        |                                        |     |    |    |       | 547  | 681.148  | 1915.819  | 1915.813 | 0.0035 | 0 | 45.79  | 0.0042   | R | AIEMVGGELSK                    | Y |
|        |                                        |     |    |    |       | 1022 | 752.8702 | 1503.726  | 1503.721 | 0.0054 | 0 | 52.86  | 0.00049  | R | AAAEVNOEYGLDPK                 | K |
|        |                                        |     |    |    |       | 1265 |          |           |          |        |   |        |          |   |                                |   |





|      |          |          |   |          |         |   |        |          |   |                        |   |
|------|----------|----------|---|----------|---------|---|--------|----------|---|------------------------|---|
| 663  | 644.3524 | 1286.69  | 2 | 1286.687 | 0.0033  | 0 | 70.3   | 1.20E-05 | K | HALIYDLSK              | O |
| 665  | 644.3525 | 1286.691 | 2 | 1286.687 | 0.0035  | 0 | 35.76  | 0.034    | K | HALIYDLSK              | O |
| 666  | 644.3525 | 1286.691 | 2 | 1286.687 | 0.0035  | 0 | 65.05  | 3.90E-05 | K | HALIYDLSK              | O |
| 667  | 644.3526 | 1286.691 | 2 | 1286.687 | 0.0036  | 0 | 34.42  | 0.045    | K | HALIYDLSK              | O |
| 670  | 644.3527 | 1286.691 | 2 | 1286.687 | 0.0039  | 0 | 45.59  | 0.034    | K | HALIYDLSK              | O |
| 672  | 644.3528 | 1286.691 | 2 | 1286.687 | 0.0041  | 0 | 49.71  | 0.0013   | K | HALIYDLSK              | O |
| 673  | 644.3528 | 1286.691 | 2 | 1286.687 | 0.0041  | 0 | 38.31  | 0.018    | K | HALIYDLSK              | O |
| 675  | 644.353  | 1286.691 | 2 | 1286.687 | 0.0044  | 0 | 49.62  | 0.0012   | K | HALIYDLSK              | O |
| 676  | 644.353  | 1286.691 | 2 | 1286.687 | 0.0044  | 0 | 61.71  | 7.60E-05 | K | HALIYDLSK              | O |
| 677  | 429.9044 | 1286.691 | 3 | 1286.687 | 0.0044  | 0 | 37.99  | 0.018    | K | HALIYDLSK              | O |
| 678  | 644.353  | 1286.692 | 2 | 1286.687 | 0.0045  | 0 | 40.65  | 0.0097   | K | HALIYDLSK              | O |
| 718  | 658.8765 | 1315.738 | 2 | 1315.735 | 0.0037  | 0 | 35.56  | 0.02     | K | TSIAIDTINQK            | R |
| 720  | 658.8766 | 1315.739 | 2 | 1315.735 | 0.004   | 0 | 74.23  | 2.70E-06 | K | TSIAIDTINQK            | R |
| 721  | 658.8768 | 1315.739 | 2 | 1315.735 | 0.0043  | 0 | 84.68  | 2.10E-07 | K | TSIAIDTINQK            | R |
| 722  | 658.8768 | 1315.739 | 2 | 1315.735 | 0.0043  | 0 | 68.35  | 9.20E-06 | K | TSIAIDTINQK            | R |
| 723  | 658.8771 | 1315.74  | 2 | 1315.735 | 0.0049  | 0 | 58.88  | 8.10E-05 | K | TSIAIDTINQK            | R |
| 724  | 658.8771 | 1315.74  | 2 | 1315.735 | 0.0049  | 0 | 94.07  | 2.50E-08 | K | TSIAIDTINQK            | R |
| 744  | 664.3596 | 1326.705 | 2 | 1326.701 | 0.0022  | 0 | 47.09  | 0.0019   | K | LYC'IYVAIQK            | R |
| 745  | 664.3593 | 1326.704 | 2 | 1326.701 | 0.0035  | 0 | 34.33  | 0.034    | K | LYC'IYVAIQK            | R |
| 746  | 664.3595 | 1326.704 | 2 | 1326.701 | 0.0039  | 0 | 47.88  | 0.0016   | K | LYC'IYVAIQK            | R |
| 747  | 664.3595 | 1326.704 | 2 | 1326.701 | 0.0039  | 0 | 65.88  | 2.50E-05 | K | LYC'IYVAIQK            | R |
| 748  | 664.3595 | 1326.704 | 2 | 1326.701 | 0.0039  | 0 | 68.96  | 1.20E-05 | K | LYC'IYVAIQK            | R |
| 749  | 664.3596 | 1326.705 | 2 | 1326.701 | 0.004   | 0 | 50.83  | 0.00081  | K | LYC'IYVAIQK            | R |
| 750  | 664.3596 | 1326.705 | 2 | 1326.701 | 0.0041  | 0 | 39.81  | 0.01     | K | LYC'IYVAIQK            | R |
| 751  | 664.3597 | 1326.705 | 2 | 1326.701 | 0.0042  | 0 | 48.65  | 0.0013   | K | LYC'IYVAIQK            | R |
| 752  | 664.3597 | 1326.705 | 2 | 1326.701 | 0.0042  | 0 | 44.49  | 0.0033   | K | LYC'IYVAIQK            | R |
| 753  | 664.3597 | 1326.705 | 2 | 1326.701 | 0.0042  | 0 | 50.86  | 0.00076  | K | LYC'IYVAIQK            | R |
| 755  | 443.2424 | 1326.706 | 3 | 1326.701 | 0.0049  | 0 | 45.37  | 0.0027   | K | LYC'IYVAIQK            | R |
| 768  | 668.842  | 1335.669 | 2 | 1335.671 | -0.0017 | 0 | 41.09  | 0.011    | K | EIVTNFLAGFEP           | - |
| 769  | 668.8447 | 1335.675 | 2 | 1335.671 | 0.0038  | 0 | 53.71  | 0.00049  | K | EIVTNFLAGFEP           | - |
| 770  | 668.8447 | 1335.675 | 2 | 1335.671 | 0.0038  | 0 | 96.07  | 2.90E-08 | K | EIVTNFLAGFEP           | - |
| 771  | 668.845  | 1335.675 | 2 | 1335.671 | 0.0043  | 0 | 42.44  | 0.0064   | K | EIVTNFLAGFEP           | - |
| 799  | 679.879  | 1357.743 | 2 | 1357.739 | 0.0046  | 1 | 48.93  | 0.0011   | R | ISVREPMQTGK            | A |
| 817  | 687.8764 | 1373.738 | 2 | 1373.734 | 0.0046  | 1 | 41.85  | 0.0059   | R | ISVREPMQTGK            | A |
| 850  | 712.342  | 1422.669 | 2 | 1422.666 | 0.0034  | 0 | 91.41  | 6.30E-08 | K | TGTAEMSSILEER          | I |
| 851  | 712.3422 | 1422.67  | 2 | 1422.666 | 0.0039  | 0 | 85.62  | 2.40E-07 | K | TGTAEMSSILEER          | I |
| 852  | 712.3427 | 1422.671 | 2 | 1422.666 | 0.0047  | 0 | 86.94  | 1.70E-07 | K | TGTAEMSSILEER          | I |
| 853  | 712.3427 | 1422.671 | 2 | 1422.666 | 0.0048  | 0 | 81.68  | 5.60E-07 | K | TGTAEMSSILEER          | I |
| 854  | 712.3428 | 1422.671 | 2 | 1422.666 | 0.005   | 0 | 74.24  | 3.00E-06 | K | TGTAEMSSILEER          | I |
| 855  | 712.3428 | 1422.671 | 2 | 1422.666 | 0.0051  | 0 | 69.12  | 9.70E-06 | K | TGTAEMSSILEER          | I |
| 856  | 712.343  | 1422.671 | 2 | 1422.666 | 0.0053  | 0 | 89.85  | 9.50E-06 | K | TGTAEMSSILEER          | I |
| 872  | 450.2888 | 1437.844 | 3 | 1437.842 | 0.0029  | 0 | 41.26  | 0.0013   | K | GIRPAINVGLSVSR         | V |
| 873  | 719.9297 | 1437.845 | 2 | 1437.842 | 0.0034  | 0 | 65.83  | 4.50E-06 | K | GIRPAINVGLSVSR         | V |
| 875  | 480.2891 | 1437.846 | 3 | 1437.842 | 0.0039  | 0 | 35.05  | 0.0053   | K | GIRPAINVGLSVSR         | V |
| 876  | 719.9301 | 1437.846 | 2 | 1437.842 | 0.004   | 0 | 41.82  | 0.0013   | K | GIRPAINVGLSVSR         | V |
| 878  | 719.9303 | 1437.846 | 2 | 1437.842 | 0.004   | 0 | 54.61  | 7.00E-06 | K | GIRPAINVGLSVSR         | V |
| 880  | 719.9305 | 1437.846 | 2 | 1437.842 | 0.0048  | 0 | 62.76  | 1.10E-05 | K | GIRPAINVGLSVSR         | V |
| 881  | 480.2895 | 1437.847 | 3 | 1437.842 | 0.0052  | 0 | 33.46  | 0.0091   | K | GIRPAINVGLSVSR         | V |
| 882  | 480.2896 | 1437.847 | 3 | 1437.842 | 0.0054  | 0 | 53.44  | 9.10E-05 | K | GIRPAINVGLSVSR         | V |
| 884  | 719.9308 | 1437.847 | 2 | 1437.842 | 0.0056  | 0 | 59.28  | 2.60E-05 | K | GIRPAINVGLSVSR         | V |
| 885  | 720.3398 | 1438.665 | 2 | 1438.661 | 0.0041  | 0 | 57.95  | 0.00014  | K | TGTAEM@SSILEER         | I |
| 886  | 720.3398 | 1438.665 | 2 | 1438.661 | 0.0041  | 0 | 74.93  | 2.90E-06 | K | TGTAEM@SSILEER         | I |
| 887  | 720.3401 | 1438.666 | 2 | 1438.661 | 0.0048  | 0 | 82.65  | 4.60E-07 | K | TGTAEM@SSILEER         | I |
| 888  | 720.3405 | 1438.666 | 2 | 1438.661 | 0.0054  | 0 | 73.59  | 4.10E-06 | K | TGTAEM@SSILEER         | I |
| 889  | 720.3405 | 1438.667 | 2 | 1438.661 | 0.0055  | 0 | 63.32  | 0.0025   | K | TGTAEM@SSILEER         | I |
| 906  | 728.408  | 1454.802 | 2 | 1454.796 | 0.006   | 1 | 86.16  | 1.60E-07 | K | KLVC'IYVAIQK           | R |
| 935  | 736.9275 | 1471.84  | 2 | 1471.836 | 0.0046  | 1 | 77.27  | 6.40E-07 | K | TSIAIDTINQK            | R |
| 945  | 495.2757 | 1482.805 | 3 | 1482.802 | 0.0036  | 1 | 44.52  | 0.0019   | K | LYC'IYVAIQK            | F |
| 948  | 742.4102 | 1482.806 | 2 | 1482.802 | 0.0041  | 1 | 51.1   | 0.00047  | K | LYC'IYVAIQK            | F |
| 949  | 495.2767 | 1482.808 | 3 | 1482.802 | 0.0066  | 1 | 41.74  | 0.0043   | K | LYC'IYVAIQK            | S |
| 1019 | 777.3748 | 1552.735 | 2 | 1552.731 | 0.0039  | 0 | 45.47  | 0.0026   | R | EAYPGDVFYLHRS          | L |
| 1024 | 777.3755 | 1552.736 | 2 | 1552.731 | 0.0054  | 0 | 69.49  | 1.10E-05 | R | EAYPGDVFYLHRS          | L |
| 1025 | 777.376  | 1552.737 | 2 | 1552.731 | 0.0065  | 0 | 65.66  | 2.40E-05 | R | EAYPGDVFYLHRS          | L |
| 1042 | 788.3987 | 1574.783 | 2 | 1574.779 | 0.004   | 0 | 69.83  | 9.50E-06 | R | ILGADTSVLEETGR         | V |
| 1043 | 788.3989 | 1574.783 | 2 | 1574.779 | 0.0044  | 0 | 112.44 | 5.20E-10 | R | ILGADTSVLEETGR         | V |
| 1044 | 788.3991 | 1574.784 | 2 | 1574.779 | 0.0049  | 0 | 94.76  | 3.00E-08 | R | ILGADTSVLEETGR         | V |
| 1045 | 788.3993 | 1574.784 | 2 | 1574.779 | 0.0053  | 0 | 80.52  | 8.00E-07 | R | ILGADTSVLEETGR         | V |
| 1046 | 788.3994 | 1574.784 | 2 | 1574.779 | 0.0055  | 0 | 118.8  | 1.20E-10 | R | ILGADTSVLEETGR         | V |
| 1047 | 788.3997 | 1574.785 | 2 | 1574.779 | 0.006   | 0 | 130.6  | 7.80E-12 | R | ILGADTSVLEETGR         | V |
| 1050 | 789.4346 | 1576.855 | 2 | 1576.85  | 0.0046  | 1 | 42.15  | 0.0034   | K | LKEIVTNFLAGFEP         | - |
| 1053 | 789.4353 | 1576.856 | 2 | 1576.85  | 0.006   | 1 | 51.04  | 0.00049  | K | LKEIVTNFLAGFEP         | - |
| 1098 | 536.6246 | 1606.852 | 3 | 1606.85  | 0.002   | 1 | 40.29  | 0.0088   | K | QVAGTM@KLEAGYR         | E |
| 1099 | 804.4051 | 1606.856 | 2 | 1606.85  | 0.0025  | 1 | 42.37  | 0.0037   | K | QVAGTM@KLEAGYR         | E |
| 1114 | 812.4321 | 1622.85  | 2 | 1622.845 | 0.0047  | 1 | 39.34  | 0.008    | K | QVAGTM@KLEAGYR         | E |
| 1116 | 812.9514 | 1623.888 | 2 | 1623.883 | 0.0051  | 0 | 53.99  | 0.00017  | R | TGAIQVDPVGEELLGR       | V |
| 1117 | 812.9515 | 1623.889 | 2 | 1623.883 | 0.0053  | 0 | 76.44  | 1.00E-06 | R | TGAIQVDPVGEELLGR       | V |
| 1120 | 542.3039 | 1623.889 | 3 | 1623.883 | 0.0067  | 0 | 31.48  | 0.032    | R | TGAIQVDPVGEELLGR       | V |
| 1166 | 834.4034 | 1666.792 | 2 | 1666.787 | 0.0046  | 0 | 61.94  | 5.50E-05 | K | NVOAEM@VFSSGLK         | G |
| 1167 | 834.4034 | 1666.792 | 2 | 1666.787 | 0.005   | 0 | 36.33  | 0.02     | R | NVOAEM@VFSSGLK         | G |
| 1168 | 834.4034 | 1666.792 | 2 | 1666.787 | 0.0051  | 0 | 99.09  | 1.10E-08 | R | NVOAEM@VFSSGLK         | G |
| 1169 | 834.404  | 1666.793 | 2 | 1666.787 | 0.0062  | 0 | 95.09  | 2.90E-08 | R | NVOAEM@VFSSGLK         | G |
| 1176 | 842.4003 | 1682.786 | 2 | 1682.782 | 0.0038  | 0 | 50.03  | 0.00076  | K | NVOAEM@VFSSGLK         | G |
| 1177 | 842.4006 | 1682.787 | 2 | 1682.782 | 0.0045  | 0 | 91.48  | 5.10E-08 | R | NVOAEM@VFSSGLK         | G |
| 1178 | 842.4007 | 1682.787 | 2 | 1682.782 | 0.0047  | 0 | 50.73  | 0.00061  | R | NVOAEM@VFSSGLK         | G |
| 1179 | 842.4008 | 1682.787 | 2 | 1682.782 | 0.0048  | 0 | 99.89  | 7.40E-09 | R | NVOAEM@VFSSGLK         | G |
| 1180 | 561.9363 | 1682.787 | 3 | 1682.782 | 0.0049  | 0 | 51.91  | 0.00046  | R | NVOAEM@VFSSGLK         | G |
| 1181 | 842.4012 | 1682.788 | 2 | 1682.782 | 0.0057  | 0 | 110.8  | 5.70E-05 | R | NVOAEM@VFSSGLK         | G |
| 1182 | 842.4012 | 1682.788 | 2 | 1682.782 | 0.0058  | 0 | 94.08  | 2.80E-08 | R | NVOAEM@VFSSGLK         | G |
| 1183 | 842.4016 | 1682.789 | 2 | 1682.782 | 0.0065  | 0 | 79.72  | 8.00E-07 | R | NVOAEM@VFSSGLK         | G |
| 1206 | 570.9888 | 1709.936 | 3 | 1709.931 | 0.0045  | 1 | 51.02  | 0.00027  | R | VVDALGNAIDGKPGKPSK     | T |
| 1207 | 855.9755 | 1709.937 | 2 | 1709.931 | 0.0053  | 0 | 73.71  | 1.60E-06 | R | VVDALGNAIDGKPGKPSK     | T |
| 1232 | 577.6614 | 1729.962 | 3 | 1729.957 | 0.0049  | 1 | 43.55  | 0.0012   | R | RTGAIVDPVGEELLGR       | V |
| 1263 | 594.3372 | 1779.99  | 3 | 1779.984 | 0.0055  | 1 | 36.93  | 0.0062   | K | RTGAIVDPVGEELLGR       | V |
| 1375 | 1052.526 | 2103.037 | 2 | 2103.031 | 0.0065  | 0 | 61.36  | 4.40E-05 | K | GM@SLNLEPDNVGVVFGNDK   | L |
| 1376 | 1052.527 | 2103.04  | 2 | 2103.031 | 0.009   | 0 | 85.91  | 1.50E-07 | K | GM@SLNLEPDNVGVVFGNDK   | L |
| 1377 | 702.026  | 2103.04  | 3 | 2103.031 | 0.0092  | 0 | 72.05  | 3.70E-06 | K | GM@SLNLEPDNVGVVFGNDK   | L |
| 1380 | 1060.523 | 2119.03  | 2 | 2119.026 | 0.0048  | 0 | 34.74  | 0.019    | K | GM@SLNLEPDNVGVVFGNDK   | L |
| 1381 | 1060.523 | 2119.031 | 2 | 2119.026 | 0.0058  | 0 | 98.94  | 7.50E-09 | K | GM@SLNLEPDNVGVVFGNDK   | L |
| 1382 | 1060.523 | 2119.032 | 2 | 2119.026 | 0.0062  | 0 | 89.99  | 9.60E-08 | K | GM@SLNLEPDNVGVVFGNDK   | L |
| 1384 | 1060.524 | 2119.034 | 2 | 2119.026 | 0.0082  | 0 | 83.95  | 2.40E-07 | K | GM@SLNLEPDNVGVVFGNDK   | L |
| 1386 | 707.3522 | 2119.035 | 3 | 2119.026 | 0.0091  | 0 | 50.72  | 0.00051  | K | GM@SLNLEPDNVGVVFGNDK   | L |
| 1419 | 553.0699 | 2208.25  | 4 | 2208.245 | 0.0053  | 1 | 28.75  | 0.015    | K | GIRPAINVGLSVSRVGGAAQT  | A |
| 1491 | 1155.086 | 2308.158 | 2 | 2308.152 | 0.0059  | 0 | 89.7   | 5.80E-08 | K | QGOYSPM@AIEEQVAVIYAVGR | R |
| 1492 | 770.394  | 2308.16  |   |          |         |   |        |          |   |                        |   |

|      |          |          |   |          |         |   |        |          |   |                |   |
|------|----------|----------|---|----------|---------|---|--------|----------|---|----------------|---|
| 151  | 438.7533 | 875.4921 | 2 | 875.4999 | 0.0023  | 0 | 44.18  | 0.0066   | R | QM@SLLLR       | R |
| 152  | 438.7534 | 875.4922 | 2 | 875.4999 | 0.0023  | 0 | 40.12  | 0.017    | R | QM@SLLLR       | R |
| 153  | 438.7535 | 875.4925 | 2 | 875.4999 | 0.0027  | 0 | 38.29  | 0.025    | R | QM@SLLLR       | R |
| 179  | 446.7491 | 891.4817 | 2 | 891.4814 | 0.0003  | 0 | 39.85  | 0.017    | R | LELAQYR        | R |
| 180  | 446.749  | 891.4834 | 2 | 891.4814 | 0.0002  | 0 | 40.06  | 0.02     | R | LELAQYR        | R |
| 183  | 446.7491 | 891.4837 | 2 | 891.4814 | 0.0023  | 0 | 39.67  | 0.02     | R | LELAQYR        | R |
| 199  | 452.2348 | 902.455  | 2 | 902.4531 | 0.0019  | 0 | 37.98  | 0.032    | R | EPMOTGIK       | A |
| 200  | 452.2348 | 902.4551 | 2 | 902.4531 | 0.0019  | 0 | 45.5   | 0.006    | R | EPMOTGIK       | A |
| 207  | 500.7928 | 999.571  | 2 | 999.5713 | -0.0003 | 0 | 35.06  | 0.039    | R | VLSDGIAR       | V |
| 201  | 500.7939 | 999.5733 | 2 | 999.5713 | 0.0002  | 0 | 62.07  | 8.10E-05 | R | VLSDGIAR       | V |
| 293  | 500.8061 | 999.5977 | 2 | 999.5964 | 0.0013  | 1 | 39.27  | 0.012    | K | LIKEDVVK       | R |
| 297  | 501.3094 | 1000.604 | 2 | 1000.603 | 0.0012  | 1 | 37.24  | 0.012    | K | RSTVAQLVK      | R |
| 299  | 501.3097 | 1000.605 | 2 | 1000.603 | 0.0019  | 1 | 33.58  | 0.029    | K | RSTVAQLVK      | R |
| 314  | 510.7613 | 1019.508 | 2 | 1019.507 | 0.0011  | 1 | 35.99  | 0.042    | K | RLTDADAMK      | R |
| 316  | 510.7614 | 1019.508 | 2 | 1019.507 | 0.0014  | 1 | 37.21  | 0.033    | K | RLTDADAMK      | Y |
| 318  | 510.7617 | 1019.509 | 2 | 1019.507 | 0.0019  | 1 | 37.45  | 0.031    | K | RLTDADAMK      | Y |
| 327  | 513.8015 | 1025.588 | 2 | 1025.587 | 0.0014  | 0 | 55.79  | 0.00015  | K | AVDSLVPIGR     | G |
| 328  | 513.8016 | 1025.589 | 2 | 1025.587 | 0.0016  | 0 | 41.62  | 0.004    | K | AVDSLVPIGR     | G |
| 329  | 513.8016 | 1025.589 | 2 | 1025.587 | 0.0016  | 0 | 60.27  | 5.50E-05 | K | AVDSLVPIGR     | G |
| 330  | 513.8017 | 1025.589 | 2 | 1025.587 | 0.0019  | 0 | 32.57  | 0.032    | K | AVDSLVPIGR     | G |
| 331  | 513.8017 | 1025.589 | 2 | 1025.587 | 0.0019  | 0 | 55.99  | 0.00015  | K | AVDSLVPIGR     | G |
| 346  | 518.7593 | 1035.504 | 2 | 1035.502 | 0.0021  | 1 | 42.3   | 0.0099   | K | RLTDADAMK      | G |
| 457  | 560.8647 | 1119.715 | 2 | 1119.713 | 0.0022  | 1 | 48.55  | 8.50E-05 | R | GYLKDLEPSK     | Y |
| 516  | 575.3116 | 1148.609 | 2 | 1148.608 | 0.001   | 1 | 50.84  | 0.00097  | R | GYLKDLEPSK     | I |
| 517  | 575.3119 | 1148.609 | 2 | 1148.608 | 0.0016  | 1 | 38.08  | 0.023    | R | GYLKDLEPSK     | I |
| 522  | 583.8778 | 1148.612 | 3 | 1148.608 | 0.0038  | 1 | 43.26  | 0.0069   | R | GYLKDLEPSK     | I |
| 564  | 586.3196 | 1170.625 | 2 | 1170.625 | 0.0003  | 0 | 92.31  | 5.80E-08 | K | VVDALGNAIDGK   | G |
| 565  | 586.3204 | 1170.626 | 2 | 1170.625 | 0.0017  | 0 | 66.5   | 2.50E-05 | R | VVDALGNAIDGK   | G |
| 566  | 586.3204 | 1170.626 | 2 | 1170.625 | 0.0017  | 0 | 68.43  | 1.80E-05 | R | VVDALGNAIDGK   | G |
| 568  | 586.3206 | 1170.627 | 2 | 1170.625 | 0.0022  | 0 | 57.56  | 0.0002   | R | VVDALGNAIDGK   | G |
| 569  | 586.3207 | 1170.627 | 2 | 1170.625 | 0.0024  | 0 | 46.25  | 0.0027   | R | VVDALGNAIDGK   | G |
| 570  | 586.3209 | 1170.627 | 2 | 1170.625 | 0.0027  | 0 | 97.94  | 1.90E-08 | R | VVDALGNAIDGK   | G |
| 571  | 586.321  | 1170.627 | 2 | 1170.625 | 0.003   | 0 | 76.24  | 3.00E-06 | R | VVDALGNAIDGK   | G |
| 725  | 644.3517 | 1286.689 | 2 | 1286.687 | 0.0018  | 0 | 66.44  | 3.10E-05 | K | HALIYDLSK      | O |
| 726  | 644.3518 | 1286.689 | 2 | 1286.687 | 0.002   | 0 | 65.25  | 4.00E-05 | K | HALIYDLSK      | O |
| 729  | 644.3519 | 1286.689 | 2 | 1286.687 | 0.0023  | 0 | 70.36  | 1.20E-05 | K | HALIYDLSK      | O |
| 731  | 644.3522 | 1286.689 | 2 | 1286.687 | 0.0028  | 0 | 50.93  | 0.0011   | K | HALIYDLSK      | O |
| 732  | 644.3522 | 1286.689 | 2 | 1286.687 | 0.0029  | 0 | 53.98  | 0.00053  | K | HALIYDLSK      | O |
| 733  | 644.3522 | 1286.689 | 2 | 1286.687 | 0.0029  | 0 | 35.35  | 0.039    | K | HALIYDLSK      | O |
| 734  | 644.3523 | 1286.689 | 2 | 1286.687 | 0.003   | 0 | 63.01  | 6.70E-05 | K | HALIYDLSK      | O |
| 735  | 644.3524 | 1286.689 | 2 | 1286.687 | 0.0031  | 0 | 45.17  | 0.0041   | K | HALIYDLSK      | O |
| 736  | 644.3525 | 1286.689 | 2 | 1286.687 | 0.0034  | 0 | 50.15  | 0.0013   | K | HALIYDLSK      | O |
| 737  | 644.3525 | 1286.689 | 2 | 1286.687 | 0.0034  | 0 | 61.5   | 9.50E-05 | K | HALIYDLSK      | O |
| 738  | 644.3526 | 1286.689 | 2 | 1286.687 | 0.0036  | 0 | 48.94  | 0.0016   | K | HALIYDLSK      | O |
| 743  | 649.3044 | 1286.691 | 3 | 1286.687 | 0.0043  | 0 | 41.12  | 0.0087   | K | HALIYDLSK      | O |
| 787  | 658.8759 | 1315.737 | 2 | 1315.735 | 0.0024  | 0 | 79.19  | 9.50E-07 | R | TSIAIDTINOK    | R |
| 788  | 658.8759 | 1315.737 | 2 | 1315.735 | 0.0024  | 0 | 87.12  | 1.50E-07 | R | TSIAIDTINOK    | R |
| 789  | 658.8763 | 1315.738 | 2 | 1315.735 | 0.0033  | 0 | 71.51  | 5.80E-06 | R | TSIAIDTINOK    | R |
| 790  | 658.8764 | 1315.738 | 2 | 1315.735 | 0.0035  | 0 | 76.34  | 1.60E-06 | R | TSIAIDTINOK    | R |
| 791  | 658.8764 | 1315.738 | 2 | 1315.735 | 0.0035  | 0 | 91.55  | 4.30E-08 | R | TSIAIDTINOK    | R |
| 793  | 658.8767 | 1315.739 | 2 | 1315.735 | 0.0042  | 0 | 99.03  | 8.60E-09 | R | TSIAIDTINOK    | R |
| 812  | 664.3586 | 1326.703 | 2 | 1326.701 | 0.0022  | 0 | 39.12  | 0.012    | K | LYC'IYVAIGQK   | R |
| 814  | 664.3588 | 1326.703 | 2 | 1326.701 | 0.0025  | 0 | 51.05  | 0.00078  | K | LYC'IYVAIGQK   | R |
| 815  | 664.3588 | 1326.703 | 2 | 1326.701 | 0.0025  | 0 | 53.68  | 0.00043  | K | LYC'IYVAIGQK   | R |
| 816  | 664.3588 | 1326.703 | 2 | 1326.701 | 0.0026  | 0 | 66.48  | 2.10E-05 | K | LYC'IYVAIGQK   | R |
| 817  | 664.3589 | 1326.703 | 2 | 1326.701 | 0.0026  | 0 | 58.21  | 0.00014  | K | LYC'IYVAIGQK   | R |
| 819  | 664.359  | 1326.704 | 2 | 1326.701 | 0.0029  | 0 | 50.5   | 0.00083  | K | LYC'IYVAIGQK   | R |
| 820  | 664.359  | 1326.704 | 2 | 1326.701 | 0.0029  | 0 | 56.78  | 0.0002   | K | LYC'IYVAIGQK   | R |
| 821  | 664.3591 | 1326.704 | 2 | 1326.701 | 0.0031  | 0 | 46.41  | 0.0021   | K | LYC'IYVAIGQK   | R |
| 822  | 664.3594 | 1326.704 | 2 | 1326.701 | 0.0037  | 0 | 45.16  | 0.003    | K | LYC'IYVAIGQK   | R |
| 823  | 664.3595 | 1326.704 | 2 | 1326.701 | 0.0039  | 0 | 74.98  | 3.10E-06 | K | LYC'IYVAIGQK   | R |
| 824  | 664.36   | 1326.706 | 2 | 1326.701 | 0.005   | 0 | 38.17  | 0.014    | K | LYC'IYVAIGQK   | R |
| 834  | 668.8444 | 1335.674 | 2 | 1335.671 | 0.0032  | 0 | 81.4   | 9.00E-07 | K | EIVTNFLAGFEP   | - |
| 835  | 668.8445 | 1335.674 | 2 | 1335.671 | 0.0033  | 0 | 79.97  | 1.20E-06 | R | EIVTNFLAGFEP   | - |
| 836  | 668.8445 | 1335.675 | 2 | 1335.671 | 0.0035  | 0 | 50.2   | 0.0012   | K | EIVTNFLAGFEP   | - |
| 874  | 679.8776 | 1357.741 | 2 | 1357.739 | 0.0018  | 1 | 44.53  | 0.0029   | R | ISVREPMTGIK    | A |
| 890  | 687.8749 | 1373.736 | 2 | 1373.734 | 0.0015  | 1 | 42.92  | 0.0049   | R | ISVREPMTGIK    | A |
| 931  | 712.3417 | 1422.669 | 2 | 1422.666 | 0.0028  | 0 | 100.77 | 6.90E-09 | K | TGTAEMSSILEER  | I |
| 932  | 712.3419 | 1422.669 | 2 | 1422.666 | 0.0031  | 0 | 86.8   | 1.80E-07 | K | TGTAEMSSILEER  | I |
| 933  | 712.342  | 1422.669 | 2 | 1422.666 | 0.0034  | 0 | 76.78  | 1.80E-06 | K | TGTAEMSSILEER  | I |
| 934  | 712.342  | 1422.67  | 2 | 1422.666 | 0.0035  | 0 | 98.88  | 1.10E-08 | K | TGTAEMSSILEER  | I |
| 936  | 712.3426 | 1422.671 | 2 | 1422.666 | 0.0046  | 0 | 46.23  | 0.002    | K | TGTAEMSSILEER  | I |
| 950  | 719.9293 | 1437.842 | 2 | 1437.842 | 0.0006  | 0 | 68.06  | 2.90E-08 | R | GIRPAINVGLSVSR | V |
| 953  | 480.2885 | 1437.844 | 3 | 1437.842 | 0.0022  | 0 | 28.33  | 0.028    | K | GIRPAINVGLSVSR | V |
| 954  | 719.9293 | 1437.844 | 2 | 1437.842 | 0.0025  | 0 | 40.98  | 0.0015   | K | GIRPAINVGLSVSR | V |
| 955  | 480.2887 | 1437.844 | 3 | 1437.842 | 0.0027  | 0 | 32.32  | 0.011    | K | GIRPAINVGLSVSR | V |
| 956  | 719.9294 | 1437.844 | 2 | 1437.842 | 0.0028  | 0 | 55.89  | 4.80E-05 | K | GIRPAINVGLSVSR | V |
| 957  | 719.9294 | 1437.844 | 2 | 1437.842 | 0.0028  | 0 | 52.31  | 0.0009   | K | GIRPAINVGLSVSR | V |
| 958  | 480.289  | 1437.845 | 3 | 1437.842 | 0.0035  | 0 | 56.61  | 3.70E-05 | K | GIRPAINVGLSVSR | V |
| 959  | 480.289  | 1437.845 | 3 | 1437.842 | 0.0036  | 0 | 46.58  | 0.00037  | K | GIRPAINVGLSVSR | V |
| 961  | 720.3384 | 1438.663 | 2 | 1438.661 | 0.0014  | 0 | 70.18  | 8.00E-06 | K | TGTAEM@SSILEER | I |
| 962  | 720.3387 | 1438.663 | 2 | 1438.661 | 0.002   | 0 | 86.98  | 1.30E-07 | K | TGTAEM@SSILEER | I |
| 963  | 720.339  | 1438.664 | 2 | 1438.661 | 0.0026  | 0 | 74.73  | 2.90E-06 | K | TGTAEM@SSILEER | I |
| 971  | 485.94   | 1454.798 | 3 | 1454.796 | 0.0026  | 1 | 42.26  | 0.0037   | K | KLVC'IYVAIGQK  | R |
| 973  | 728.4064 | 1454.798 | 2 | 1454.796 | 0.0028  | 1 | 97.57  | 9.70E-09 | K | KLVC'IYVAIGQK  | R |
| 1003 | 736.9268 | 1471.839 | 2 | 1471.836 | 0.0033  | 1 | 38.28  | 0.0052   | K | TSIAIDTINOK    | R |
| 1005 | 491.6205 | 1471.84  | 3 | 1471.836 | 0.004   | 0 | 46.36  | 0.0009   | K | TSIAIDTINOK    | R |
| 1014 | 495.2753 | 1482.804 | 3 | 1482.802 | 0.0023  | 1 | 38.77  | 0.0085   | K | LYC'IYVAIGQKR  | S |
| 1015 | 742.4093 | 1482.804 | 2 | 1482.802 | 0.0024  | 1 | 54.56  | 0.00023  | K | LYC'IYVAIGQKR  | S |
| 1016 | 495.2754 | 1482.804 | 3 | 1482.802 | 0.0026  | 1 | 42.62  | 0.0035   | K | LYC'IYVAIGQKR  | S |
| 1083 | 518.5947 | 1552.732 | 2 | 1552.731 | 0.0011  | 0 | 35.94  | 0.025    | R | EAYPGDVFYLHSR  | L |
| 1084 | 777.3738 | 1552.733 | 2 | 1552.731 | 0.002   | 0 | 77.84  | 1.60E-06 | R | EAYPGDVFYLHSR  | L |
| 1085 | 777.3738 | 1552.733 | 2 | 1552.731 | 0.002   | 0 | 74.78  | 3.30E-06 | R | EAYPGDVFYLHSR  | L |
| 1089 | 777.3743 | 1552.734 | 2 | 1552.731 | 0.003   | 0 | 79.88  | 9.40E-07 | R | EAYPGDVFYLHSR  | L |
| 1113 | 786.3979 | 1574.781 | 2 | 1574.779 | 0.0024  | 0 | 95.17  | 2.90E-08 | R | ILGADTSVLEETGR | V |
| 1114 | 788.3984 | 1574.782 | 2 | 1574.779 | 0.0034  | 0 | 110.94 | 1.40E-09 | R | ILGADTSVLEETGR | V |
| 1115 | 788.3984 | 1574.782 | 2 | 1574.779 | 0.0034  | 0 | 108.69 | 1.40E-09 | R | ILGADTSVLEETGR | V |
| 1117 | 788.3986 | 1574.783 | 2 | 1574.779 | 0.0038  | 0 | 131.85 | 6.40E-12 | R | ILGADTSVLEETGR | V |
| 1118 | 788.3987 | 1574.783 | 2 | 1574.779 | 0.004   | 0 | 75.79  | 2.60E-06 | R | ILGADTSVLEETGR | V |
| 1119 | 788.3989 | 1574.785 | 2 | 1574.779 | 0.0065  | 0 | 113.12 | 4.50E-10 | R | ILGADTSVLEETGR | V |
| 1123 | 789.4333 | 1576.852 | 2 | 1576.85  | 0.0019  | 1 | 57.33  | 9.90E-05 | K | LKEIVTNFLAGFEP | - |
| 1125 | 789.4338 | 1576.853 | 2 | 1576.85  | 0.0029  | 1 | 32.91  | 0.03     | K | LKEIVTNFLAGFEP | - |
| 1127 | 789.4346 | 1576.855 | 2 | 1576.85  | 0.0046  | 1 | 58.18  | 8.30E-05 | K | LKEIVTNFLAGFEP | - |
| 1192 | 541.956  | 1622.846 | 3 | 1622.845 | 0.0012  | 1 | 31.24  | 0.049    | K | QVAGT@KLELAQYR | E |
| 1193 | 812.4308 | 1622.847 | 2 | 1622.845 | 0.002   | 0 | 50.1   |          |   |                |   |

|  |  |  |  |  |  |  |  |      |          |          |   |          |        |   |        |            |                         |   |
|--|--|--|--|--|--|--|--|------|----------|----------|---|----------|--------|---|--------|------------|-------------------------|---|
|  |  |  |  |  |  |  |  | 1730 | 603.3229 | 2409.262 | 4 | 2409.255 | 0.0071 | 0 | 41.78  | 0.002 K    | FENAF1SHVISHQSHLGNIR    | S |
|  |  |  |  |  |  |  |  | 1731 | 603.323  | 2409.263 | 4 | 2409.255 | 0.0076 | 0 | 48.25  | 0.00048 K  | FENAF1SHVISHQSHLGNIR    | S |
|  |  |  |  |  |  |  |  | 1732 | 603.3231 | 2409.263 | 4 | 2409.255 | 0.0081 | 0 | 36.16  | 0.008 K    | FENAF1SHVISHQSHLGNIR    | S |
|  |  |  |  |  |  |  |  | 1733 | 804.0951 | 2409.264 | 3 | 2409.255 | 0.0081 | 0 | 71.92  | 2.10E-06 K | FENAF1SHVISHQSHLGNIR    | S |
|  |  |  |  |  |  |  |  | 1734 | 804.0953 | 2409.264 | 3 | 2409.255 | 0.0087 | 0 | 33.62  | 0.013 K    | FENAF1SHVISHQSHLGNIR    | S |
|  |  |  |  |  |  |  |  | 1735 | 804.0957 | 2409.265 | 3 | 2409.255 | 0.01   | 0 | 87.51  | 5.20E-08 K | FENAF1SHVISHQSHLGNIR    | S |
|  |  |  |  |  |  |  |  | 1833 | 918.1702 | 2751.489 | 3 | 2751.482 | 0.0068 | 1 | 97.88  | 1.80E-09 K | ITKFENAF1SHVISHQSHLGNIR | S |
|  |  |  |  |  |  |  |  | 1834 | 688.8798 | 2751.49  | 4 | 2751.482 | 0.0079 | 1 | 54.1   | 4.20E-05 K | ITKFENAF1SHVISHQSHLGNIR | S |
|  |  |  |  |  |  |  |  | 1836 | 688.38   | 2751.491 | 4 | 2751.482 | 0.0089 | 0 | 52.73  | 6.10E-05 K | ITKFENAF1SHVISHQSHLGNIR | S |
|  |  |  |  |  |  |  |  | 684  | 622.8512 | 1243.688 | 2 | 1243.685 | 0.0032 | 0 | 69.46  | 1.20E-05 R | LIDDMVAQVLK             | S |
|  |  |  |  |  |  |  |  | 696  | 630.8484 | 1259.682 | 2 | 1259.68  | 0.0027 | 0 | 52.3   | 0.00066 R  | LIDDMVAQVLK             | S |
|  |  |  |  |  |  |  |  | 864  | 678.3506 | 1354.687 | 2 | 1354.684 | 0.0027 | 0 | 37.16  | 0.02 K     | TIEAEEAAGTVTR           | H |
|  |  |  |  |  |  |  |  | 916  | 705.3436 | 1408.673 | 2 | 1408.669 | 0.0037 | 0 | 94.95  | 3.20E-08 K | VCVTVTVESGAMTK          | D |
|  |  |  |  |  |  |  |  | 940  | 713.3408 | 1424.667 | 2 | 1424.664 | 0.0031 | 0 | 70.25  | 9.20E-06 K | DQTNDOVITDSALATOK       | D |
|  |  |  |  |  |  |  |  | 1382 | 924.4545 | 1846.894 | 2 | 1846.891 | 0.0035 | 0 | 86.28  | 1.80E-07 R | VCVTVTVESGAMTK          | D |
|  |  |  |  |  |  |  |  | 1398 | 640.9971 | 1919.969 | 3 | 1919.963 | 0.0065 | 0 | 50.49  | 0.00072 K  | LNEHFLNTDFLDTIK         | S |
|  |  |  |  |  |  |  |  | 1294 | 855.9277 | 1709.841 | 2 | 1709.837 | 0.0035 | 0 | 68.75  | 1.20E-05 R | GEFYNEASVLAIRV          | E |
|  |  |  |  |  |  |  |  | 1459 | 1034.502 | 2066.988 | 2 | 2066.983 | 0.0054 | 0 | 65.04  | 2.00E-05 R | GAGAYIC'GEETALESIEGK    | A |
|  |  |  |  |  |  |  |  | 57   | 408.2361 | 814.4576 | 2 | 814.4548 | 0.0028 | 0 | 36.38  | 0.049 R    | EILIGDR                 | Q |
|  |  |  |  |  |  |  |  | 97   | 423.2598 | 844.505  | 2 | 844.5018 | 0.0032 | 0 | 59.14  | 0.0002 R   | STVAQLVK                | R |
|  |  |  |  |  |  |  |  | 116  | 430.7565 | 859.4985 | 2 | 859.4949 | 0.0036 | 0 | 39.25  | 0.02 R     | QMSLLLR                 | R |
|  |  |  |  |  |  |  |  | 134  | 436.7537 | 875.422  | 2 | 875.4199 | 0.003  | 0 | 43.88  | 0.0069 R   | QIM8SLLLR               | R |
|  |  |  |  |  |  |  |  | 160  | 446.7495 | 891.4844 | 2 | 891.4814 | 0.003  | 0 | 40.62  | 0.015 K    | LELAQYR                 | E |
|  |  |  |  |  |  |  |  | 161  | 446.7496 | 891.4846 | 2 | 891.4814 | 0.0032 | 0 | 39.53  | 0.02 K     | LELAQYR                 | E |
|  |  |  |  |  |  |  |  | 175  | 452.2354 | 902.4562 | 2 | 902.4531 | 0.0031 | 0 | 46.19  | 0.0049 R   | EFMGTQIK                | A |
|  |  |  |  |  |  |  |  | 260  | 590.7947 | 999.5748 | 2 | 999.5713 | 0.0035 | 0 | 62.2   | 7.80E-07 R | VLISGDIQIR              | R |
|  |  |  |  |  |  |  |  | 261  | 500.7947 | 999.5748 | 2 | 999.5713 | 0.0036 | 0 | 50.63  | 0.0011 R   | VLISGDIQIR              | R |
|  |  |  |  |  |  |  |  | 263  | 501.31   | 1000.605 | 2 | 1000.603 | 0.0025 | 1 | 37.18  | 0.013 K    | RSTVAQLVK               | R |
|  |  |  |  |  |  |  |  | 279  | 510.7622 | 1019.51  | 2 | 1019.507 | 0.0028 | 1 | 36.98  | 0.036 K    | RLTDADAMK               | Y |
|  |  |  |  |  |  |  |  | 287  | 513.8018 | 1025.589 | 2 | 1025.587 | 0.0021 | 0 | 53.35  | 0.00027 K  | AVDSVPIPIGR             | R |
|  |  |  |  |  |  |  |  | 288  | 513.8019 | 1025.589 | 2 | 1025.587 | 0.0023 | 0 | 50.28  | 0.00056 R  | AVDSVPIPIGR             | R |
|  |  |  |  |  |  |  |  | 289  | 513.8019 | 1025.589 | 2 | 1025.587 | 0.0024 | 0 | 34.21  | 0.022 K    | AVDSLPIPIGR             | G |
|  |  |  |  |  |  |  |  | 290  | 513.8021 | 1025.59  | 2 | 1025.587 | 0.0026 | 0 | 49.46  | 0.00067 K  | AVDSLPIPIGR             | G |
|  |  |  |  |  |  |  |  | 420  | 560.8653 | 1119.716 | 2 | 1119.713 | 0.0032 | 1 | 40.48  | 0.00055 R  | VLGKAPGIPRR             | I |
|  |  |  |  |  |  |  |  | 507  | 586.2007 | 1170.627 | 2 | 1170.625 | 0.0024 | 0 | 37.88  | 0.019 R    | VVDALGNAIDGK            | G |
|  |  |  |  |  |  |  |  | 608  | 598.321  | 1170.627 | 2 | 1170.625 | 0.003  | 0 | 74.47  | 4.50E-06 R | VVDALGNAIDGK            | G |
|  |  |  |  |  |  |  |  | 509  | 586.3211 | 1170.628 | 2 | 1170.625 | 0.0032 | 0 | 64.47  | 4.50E-05 R | VVDALGNAIDGK            | G |
|  |  |  |  |  |  |  |  | 510  | 586.3212 | 1170.628 | 2 | 1170.625 | 0.0033 | 0 | 57.08  | 0.00024 R  | VVDALGNAIDGK            | G |
|  |  |  |  |  |  |  |  | 511  | 586.3212 | 1170.628 | 2 | 1170.625 | 0.0033 | 0 | 98.11  | 1.90E-08 R | VVDALGNAIDGK            | G |
|  |  |  |  |  |  |  |  | 512  | 586.3212 | 1170.628 | 2 | 1170.625 | 0.0035 | 0 | 70.72  | 1.10E-05 R | VVDALGNAIDGK            | G |
|  |  |  |  |  |  |  |  | 639  | 644.3524 | 1286.69  | 2 | 1286.687 | 0.0031 | 0 | 56.99  | 0.00027 K  | HALIYDOLSK              | Q |
|  |  |  |  |  |  |  |  | 640  | 644.3524 | 1286.69  | 2 | 1286.687 | 0.0033 | 0 | 58.4   | 0.00019 R  | HALIYDOLSK              | Q |
|  |  |  |  |  |  |  |  | 641  | 644.3525 | 1286.691 | 2 | 1286.687 | 0.0035 | 0 | 44.17  | 0.0048 K   | HALIYDOLSK              | Q |
|  |  |  |  |  |  |  |  | 642  | 644.3527 | 1286.691 | 2 | 1286.687 | 0.0039 | 0 | 61.34  | 9.10E-05 K | HALIYDOLSK              | Q |
|  |  |  |  |  |  |  |  | 643  | 644.3528 | 1286.691 | 2 | 1286.687 | 0.004  | 0 | 65.11  | 3.80E-05 K | HALIYDOLSK              | Q |
|  |  |  |  |  |  |  |  | 644  | 429.9044 | 1286.691 | 3 | 1286.687 | 0.0042 | 0 | 37.36  | 0.021 K    | HALIYDOLSK              | Q |
|  |  |  |  |  |  |  |  | 679  | 658.8763 | 1315.738 | 2 | 1315.735 | 0.0033 | 0 | 81.53  | 5.80E-07 K | TSIAIDTINQK             | R |
|  |  |  |  |  |  |  |  | 680  | 658.8763 | 1315.738 | 2 | 1315.735 | 0.0034 | 0 | 77.89  | 1.30E-06 K | TSIAIDTINQK             | R |
|  |  |  |  |  |  |  |  | 682  | 658.8777 | 1315.741 | 3 | 1315.735 | 0.0061 | 0 | 72.67  | 3.50E-06 K | TSIAIDTINQK             | R |
|  |  |  |  |  |  |  |  | 698  | 664.3597 | 1326.705 | 2 | 1326.701 | 0.0042 | 0 | 63.8   | 3.90E-05 K | LYC'YVAIGQK             | R |
|  |  |  |  |  |  |  |  | 699  | 664.3599 | 1326.705 | 2 | 1326.701 | 0.0047 | 0 | 43.65  | 0.004 K    | LYC'YVAIGQK             | R |
|  |  |  |  |  |  |  |  | 700  | 664.3599 | 1326.705 | 2 | 1326.701 | 0.0047 | 0 | 48.27  | 0.0014 K   | LYC'YVAIGQK             | R |
|  |  |  |  |  |  |  |  | 701  | 664.36   | 1326.705 | 2 | 1326.701 | 0.0048 | 0 | 56.67  | 0.0002 K   | LYC'YVAIGQK             | R |
|  |  |  |  |  |  |  |  | 702  | 664.36   | 1326.706 | 2 | 1326.701 | 0.0049 | 0 | 44.94  | 0.005 K    | LYC'YVAIGQK             | R |
|  |  |  |  |  |  |  |  | 712  | 668.8449 | 1335.675 | 2 | 1335.671 | 0.0042 | 0 | 70.92  | 9.10E-06 K | EIVTNFLAGFEP            | - |
|  |  |  |  |  |  |  |  | 713  | 668.8449 | 1335.675 | 2 | 1335.671 | 0.0042 | 0 | 70.97  | 9.00E-06 K | EIVTNFLAGFEP            | - |
|  |  |  |  |  |  |  |  | 741  | 679.8758 | 1357.743 | 2 | 1357.739 | 0.0044 | 1 | 42.47  | 0.0047 R   | ISVREPMQTGK             | A |
|  |  |  |  |  |  |  |  | 752  | 697.8758 | 1373.737 | 2 | 1373.734 | 0.0034 | 0 | 37.5   | 0.018 R    | ISVREPMQTGK             | A |
|  |  |  |  |  |  |  |  | 785  | 712.3421 | 1422.67  | 2 | 1422.666 | 0.0036 | 0 | 64.49  | 3.10E-05 K | TGTAEMSSILEER           | I |
|  |  |  |  |  |  |  |  | 786  | 712.3422 | 1422.67  | 2 | 1422.666 | 0.0037 | 0 | 86.5   | 1.90E-07 K | TGTAEMSSILEER           | I |
|  |  |  |  |  |  |  |  | 787  | 712.3426 | 1422.671 | 2 | 1422.666 | 0.0046 | 0 | 107.21 | 1.60E-09 K | TGTAEMSSILEER           | I |
|  |  |  |  |  |  |  |  | 788  | 712.3426 | 1422.671 | 2 | 1422.666 | 0.0046 | 0 | 92.26  | 4.90E-08 K | TGTAEMSSILEER           | I |
|  |  |  |  |  |  |  |  | 789  | 712.3433 | 1422.672 | 2 | 1422.666 | 0.0059 | 0 | 68.3   | 1.00E-07 K | TGTAEMSSILEER           | I |
|  |  |  |  |  |  |  |  | 803  | 480.289  | 1437.845 | 3 | 1437.842 | 0.0036 | 0 | 50.24  | 0.00016 K  | GIRPAINVGLSVSR          | V |
|  |  |  |  |  |  |  |  | 804  | 480.289  | 1437.845 | 3 | 1437.842 | 0.0037 | 0 | 32.18  | 0.01 K     | GIRPAINVGLSVSR          | V |
|  |  |  |  |  |  |  |  | 805  | 719.93   | 1437.845 | 2 | 1437.842 | 0.0039 | 0 | 65.51  | 4.80E-06 K | GIRPAINVGLSVSR          | V |
|  |  |  |  |  |  |  |  | 807  | 719.9304 | 1437.845 | 2 | 1437.842 | 0.0047 | 0 | 44.77  | 0.00067 K  | GIRPAINVGLSVSR          | V |
|  |  |  |  |  |  |  |  | 808  | 480.2895 | 1437.847 | 3 | 1437.842 | 0.0051 | 0 | 54.64  | 6.90E-05 K | GIRPAINVGLSVSR          | V |
|  |  |  |  |  |  |  |  | 809  | 719.9309 | 1437.847 | 2 | 1437.842 | 0.0057 | 0 | 62.29  | 1.30E-05 K | GIRPAINVGLSVSR          | V |
|  |  |  |  |  |  |  |  | 810  | 720.3399 | 1438.665 | 2 | 1438.661 | 0.0043 | 0 | 73.42  | 3.90E-06 K | TGTAEM@SSILEER          | I |
|  |  |  |  |  |  |  |  | 811  | 720.34   | 1438.665 | 2 | 1438.661 | 0.0044 | 0 | 61.47  | 6.10E-05 K | TGTAEM@SSILEER          | I |
|  |  |  |  |  |  |  |  | 813  | 720.3404 | 1438.666 | 2 | 1438.661 | 0.0045 | 0 | 65.2   | 2.80E-05 K | TGTAEM@SSILEER          | I |
|  |  |  |  |  |  |  |  | 820  | 728.4067 | 1454.799 | 2 | 1454.796 | 0.0033 | 1 | 83.55  | 2.40E-07 K | KLYC'YVAIGQK            | R |
|  |  |  |  |  |  |  |  | 843  | 736.9268 | 1471.839 | 2 | 1471.836 |        |   |        |            |                         |   |





|        |                             |                                         |     |    |       |       |                          |                         |          |       |        |            |                           |          |   |
|--------|-----------------------------|-----------------------------------------|-----|----|-------|-------|--------------------------|-------------------------|----------|-------|--------|------------|---------------------------|----------|---|
| Q8C5H8 | NAD kinase 2, mitochondrial | 110                                     | 5   | 5  | 50827 | 8.31  | 1042 545.2867 1632.838 3 | 1632.836                | 0.0025   | 0     | 49.32  | 0.001 K    | YSLKPNDOIADK              | H        |   |
|        |                             |                                         |     |    |       |       | 524 549.3201 1096.626 2  | 1096.624                | 0.0017   | 0     | 31.48  | 0.035 R    | QGNLTPLNK                 | D        |   |
|        |                             |                                         |     |    |       |       | 721 598.7883 1195.562 2  | 1195.561                | 0.0012   | 0     | 34.59  | 0.033 R    | YAESEEDLK                 | Q        |   |
|        |                             |                                         |     |    |       |       | 790 627.3408 1252.679 2  | 1252.678                | 0.0015   | 0     | 41.38  | 0.0057 R   | SEASGQPLLPVR              | Q        |   |
|        |                             |                                         |     |    |       |       | 821 641.3102 1280.606 2  | 1280.603                | 0.0029   | 0     | 49.61  | 0.0012 K   | SSGLALGCTGSK              | A        |   |
|        |                             |                                         |     |    |       |       | 1209 1006.481 2010.948 2 | 2010.942                | 0.0053   | 0     | 37.5   | 0.011 K    | VTNEYNSLSPPEEK            | I        |   |
| 30     | P05201                      | Aspartate aminotransferase, cytoplasmic | 963 | 32 | 17    | 46202 | 6.68                     | 116 424.7359 847.4572 2 | 847.4552 | 0.002 | 0      | 62.57      | 0.00016 R                 | IGADFLGR | W |
|        |                             |                                         |     |    |       |       | 117 424.736 847.4579 2   | 847.4552                | 0.002    | 0     | 57.39  | 0.0006 R   | IGADFLGR                  | W        |   |
|        |                             |                                         |     |    |       |       | 101 443.7725 885.5304 2  | 885.5284                | 0.002    | 0     | 71.85  | 1.20E-05 R | VGNLTVWVK                 | E        |   |
|        |                             |                                         |     |    |       |       | 192 443.7726 885.5307 2  | 885.5284                | 0.0023   | 0     | 70.51  | 1.30E-05 R | VGNLTVWVK                 | E        |   |
|        |                             |                                         |     |    |       |       | 221 458.7561 915.4977 2  | 915.496                 | 0.0017   | 0     | 51.37  | 0.0015 K   | QIAVMQR                   | R        |   |
|        |                             |                                         |     |    |       |       | 252 474.7674 947.5202 2  | 947.5199                | 0.0014   | 0     | 36.5   | 0.036 K    | VNLGVGAYR                 | R        |   |
|        |                             |                                         |     |    |       |       | 253 474.7674 947.5202 2  | 947.5199                | 0.0014   | 0     | 50.81  | 0.0013 K   | VNLGVGAYR                 | R        |   |
|        |                             |                                         |     |    |       |       | 385 519.2597 1036.505 2  | 1036.505                | 0.0003   | 0     | 53.13  | 0.00076 R  | INMCGLTTK                 | N        |   |
|        |                             |                                         |     |    |       |       | 416 527.2577 1052.501 2  | 1052.501                | 0.0014   | 0     | 37.13  | 0.025 R    | INMCGLTTK                 | N        |   |
|        |                             |                                         |     |    |       |       | 418 527.258 1052.501 2   | 1052.5                  | 0.002    | 0     | 40.68  | 0.012 R    | INMCGLTTK                 | N        |   |
|        |                             |                                         |     |    |       |       | 459 538.6149 1075.615 2  | 1075.614                | 0.0014   | 0     | 43.51  | 0.0035 R   | KVNLGVGAYR                | N        |   |
|        |                             |                                         |     |    |       |       | 517 561.2958 1120.577 2  | 1120.576                | 0.0006   | 0     | 41.56  | 0.0095 K   | QVEVLNKEK                 | T        |   |
|        |                             |                                         |     |    |       |       | 518 561.2959 1120.577 2  | 1120.576                | 0.0008   | 0     | 35.09  | 0.042 K    | QVEVLNKEK                 | H        |   |
|        |                             |                                         |     |    |       |       | 576 577.8307 1153.647 2  | 1153.646                | 0.0013   | 0     | 70.68  | 5.00E-06 R | LVLGDNSPAIR               | E        |   |
|        |                             |                                         |     |    |       |       | 577 577.8308 1153.647 2  | 1153.646                | 0.0016   | 0     | 55.02  | 0.00019 R  | LVLGDNSPAIR               | E        |   |
|        |                             |                                         |     |    |       |       | 717 636.3571 1270.701 2  | 1270.699                | 0.0015   | 0     | 43.13  | 0.0004 R   | VGQVQSLGTGALR             | I        |   |
|        |                             |                                         |     |    |       |       | 718 636.3579 1270.701 2  | 1270.699                | 0.0019   | 0     | 63.4   | 4.20E-05 R | VGQVQSLGTGALR             | I        |   |
|        |                             |                                         |     |    |       |       | 719 636.358 1270.701 2   | 1270.699                | 0.002    | 0     | 42.61  | 0.005 R    | VGQVQSLGTGALR             | I        |   |
|        |                             |                                         |     |    |       |       | 742 649.3388 1296.659 2  | 1296.658                | 0.0016   | 0     | 68.47  | 1.80E-05 R | ITWVSNPAGGAR              | R        |   |
|        |                             |                                         |     |    |       |       | 816 702.3944 1402.774 2  | 1402.771                | 0.0035   | 0     | 82.23  | 4.20E-07 K | IVAATLSDPELFK             | E        |   |
|        |                             |                                         |     |    |       |       | 817 702.3945 1402.774 2  | 1402.771                | 0.0036   | 0     | 85.63  | 1.90E-05 R | IVAATLSDPELFK             | E        |   |
|        |                             |                                         |     |    |       |       | 818 702.3945 1402.775 2  | 1402.771                | 0.0037   | 0     | 61.35  | 5.10E-05 R | IVAATLSDPELFK             | E        |   |
|        |                             |                                         |     |    |       |       | 889 763.4057 1524.797 2  | 1524.794                | 0.0032   | 0     | 72.53  | 5.10E-06 R | TDESQVWPLPVR              | K        |   |
|        |                             |                                         |     |    |       |       | 937 830.9316 1659.849 2  | 1659.847                | 0.0019   | 0     | 95.78  | 2.20E-08 K | NDYVATSHHEAVTK            | I        |   |
|        |                             |                                         |     |    |       |       | 938 830.9317 1659.849 2  | 1659.847                | 0.0026   | 0     | 39.25  | 0.012 K    | NDYVATSHHEAVTK            | I        |   |
|        |                             |                                         |     |    |       |       | 939 830.9327 1659.851 2  | 1659.847                | 0.0041   | 0     | 44.38  | 0.0029 K   | NDYVATSHHEAVTK            | I        |   |
|        |                             |                                         |     |    |       |       | 1054 996.5712 1991.128 2 | 1991.124                | 0.0035   | 0     | 55.56  | 3.30E-05 M | APPSVFAQVPOAPPVLFVK       | L        |   |
|        |                             |                                         |     |    |       |       | 1055 996.5716 1991.128 2 | 1991.124                | 0.0036   | 0     | 50.96  | 9.10E-05 M | APPSVFAQVPOAPPVLFVK       | L        |   |
|        |                             |                                         |     |    |       |       | 1056 996.5717 1991.13 2  | 1991.124                | 0.0054   | 0     | 40.18  | 0.0012 M   | APPSVFAQVPOAPPVLFVK       | L        |   |
|        |                             |                                         |     |    |       |       | 1057 996.5724 1991.13 2  | 1991.124                | 0.0059   | 0     | 44.35  | 0.00046 M  | APPSVFAQVPOAPPVLFVK       | L        |   |
|        |                             |                                         |     |    |       |       | 1195 800.4182 2398.233 3 | 2398.228                | 0.0046   | 0     | 30.7   | 0.031 K    | IANDSNLHLYPLGLAEFR        | S        |   |
|        |                             |                                         |     |    |       |       | 1215 879.7651 2636.274 3 | 2636.266                | 0.0076   | 0     | 42.46  | 0.0023 K   | NTPYVSSPTSHNNHVAASGFK     | D        |   |
|        |                             |                                         |     |    |       |       | 138 429.7011 857.3877 2  | 857.3854                | 0.0023   | 0     | 36.25  | 0.013 K    | FAAAAYCR                  | S        |   |
|        |                             |                                         |     |    |       |       | 248 472.846 947.5202 2   | 947.5199                | 0.0017   | 0     | 58.37  | 0.0002 R   | ISALSGR                   | D        |   |
|        |                             |                                         |     |    |       |       | 324 500.2327 998.4508 2  | 998.4491                | 0.0017   | 0     | 52.37  | 0.00047 R  | YGMGTSVER                 | A        |   |
|        |                             |                                         |     |    |       |       | 345 508.2297 1014.445 2  | 1014.444                | 0.0009   | 0     | 44.76  | 0.0016 R   | YGMGTSVER                 | A        |   |
|        |                             |                                         |     |    |       |       | 585 588.3082 1158.602 2  | 1158.599                | 0.0025   | 1     | 39.19  | 0.019 R    | TREEIQEVR                 | A        |   |
|        |                             |                                         |     |    |       |       | 634 597.2872 1192.56 2   | 1192.558                | 0.0017   | 0     | 92.21  | 7.50E-08 R | VDGM@DILCCYR              | F        |   |
|        |                             |                                         |     |    |       |       | 785 788.8819 1335.689 2  | 1335.686                | 0.0037   | 0     | 64.96  | 3.50E-05 R | TRPIEIQYR                 | E        |   |
|        |                             |                                         |     |    |       |       | 827 706.3937 1410.773 2  | 1410.772                | 0.001    | 0     | 69.7   | 6.60E-06 R | LEEGPPTVTLTR              | E        |   |
|        |                             |                                         |     |    |       |       | 828 706.3943 1410.774 2  | 1410.772                | 0.0022   | 0     | 61     | 5.20E-05 R | LEEGPPTVTLTR              | E        |   |
|        |                             |                                         |     |    |       |       | 843 717.3899 1432.725 2  | 1432.723                | 0.0022   | 0     | 62.45  | 6.40E-05 R | MVNSNLSVEELK              | E        |   |
|        |                             |                                         |     |    |       |       | 947 718.346 1434.678 2   | 1434.675                | 0.0027   | 0     | 60.13  | 8.50E-05 R | LPFC@ENR                  | E        |   |
|        |                             |                                         |     |    |       |       | 1153 764.0594 2289.157 3 | 2289.152                | 0.0043   | 1     | 48.49  | 0.00067 R  | M@VNSNLSVEELKEDVDR        | K        |   |
|        |                             |                                         |     |    |       |       | 1187 783.0809 2346.221 3 | 2346.215                | 0.0055   | 0     | 64.61  | 1.50E-05 K | NFYGGNVG@VQPLGAGIALC@K    | S        |   |
|        |                             |                                         |     |    |       |       | 306 496.325 990.6354 2   | 990.6338                | 0.0015   | 0     | 50.91  | 4.70E-05 R | LVIAGHLR                  | I        |   |
|        |                             |                                         |     |    |       |       | 540 542.2843 1134.554 2  | 1134.553                | 0.0015   | 0     | 56.05  | 0.00037 K  | IAMQTLDM@GR               | I        |   |
|        |                             |                                         |     |    |       |       | 590 584.2974 1186.545 2  | 1186.542                | 0.002    | 0     | 43.17  | 0.0051 K   | IAMQTLDM@GR               | I        |   |
|        |                             |                                         |     |    |       |       | 699 630.8356 1259.657 2  | 1259.654                | 0.0024   | 0     | 53.65  | 0.00062 K  | LADMALALESAR              | L        |   |
|        |                             |                                         |     |    |       |       | 722 638.8331 1275.652 2  | 1275.649                | 0.0023   | 0     | 80.75  | 1.20E-06 K | LADM@ALALESAR             | L        |   |
|        |                             |                                         |     |    |       |       | 892 768.8901 1537.766 2  | 1537.762                | 0.0033   | 0     | 111.84 | 7.30E-10 R | ITEIEGTSIOR               | R        |   |
|        |                             |                                         |     |    |       |       | 1014 938.0101 1814.006 3 | 1814.001                | 0.0045   | 0     | 28.22  | 0.048 K    | GISAFVPM@PTPGLTLGK        | K        |   |
|        |                             |                                         |     |    |       |       | 1179 775.4054 2323.194 3 | 2323.192                | 0.0028   | 0     | 46.45  | 0.00098 R  | AC@ASTGVM@SVNSLYLGLPK     | F        |   |
|        |                             |                                         |     |    |       |       | 580 578.3411 1154.668 2  | 1154.666                | 0.0017   | 0     | 35.36  | 0.019 K    | QGLLGNIAEK                | H        |   |
|        |                             |                                         |     |    |       |       | 587 582.2892 1162.564 2  | 1162.562                | 0.0021   | 0     | 57.99  | 0.00025 R  | SGSDWLNLSK                | V        |   |
|        |                             |                                         |     |    |       |       | 690 625.8126 1249.611 2  | 1249.609                | 0.0016   | 0     | 36.98  | 0.028 R    | IFSSHDIFR                 | E        |   |
|        |                             |                                         |     |    |       |       | 712 634.8464 1267.678 2  | 1267.677                | 0.001    | 0     | 62.04  | 4.70E-05 R | LPAN@SEENK                | V        |   |
|        |                             |                                         |     |    |       |       | 893 770.8687 1539.723 2  | 1539.721                | 0.0023   | 0     | 96.51  | 2.00E-08 K | AQDTAEFLFEDVR             | L        |   |
|        |                             |                                         |     |    |       |       | 1066 1009.988 2017.961 2 | 2017.956                | 0.0048   | 0     | 80.81  | 4.80E-07 K | C@GIAIAM@TEPGAAGSDLVGR    | T        |   |
|        |                             |                                         |     |    |       |       | 165 439.2491 876.4837 2  | 876.4818                | 0.0019   | 0     | 59.96  | 0.00021 R  | VGASFLGR                  | F        |   |
|        |                             |                                         |     |    |       |       | 287 490.768 990.6354 2   | 990.6338                | 0.0013   | 0     | 68.46  | 2.00E-05 R | VGAF@C                    | F        |   |
|        |                             |                                         |     |    |       |       | 715 635.8727 1269.731 2  | 1269.729                | 0.0016   | 0     | 71.56  | 1.40E-06 R | IAATLSDPELFK              | K        |   |
|        |                             |                                         |     |    |       |       | 867 725.4084 1448.802 2  | 1448.799                | 0.0036   | 0     | 60.22  | 5.60E-05 R | FVTVQTSIGTALR             | V        |   |
|        |                             |                                         |     |    |       |       | 931 823.8735 1645.732 2  | 1645.729                | 0.003    | 0     | 36.61  | 0.0099 K   | TC@GDFSGALEIDSK           | I        |   |
|        |                             |                                         |     |    |       |       | 294 492.6179 983.5092 2  | 983.5076                | 0.0016   | 0     | 37.47  | 0.02 R     | QYVYNAK                   | A        |   |
|        |                             |                                         |     |    |       |       | 592 583.3057 1184.597 2  | 1184.594                | 0.0026   | 0     | 39.25  | 0.016 @GQK | IPAN@SEENK                | G        |   |
|        |                             |                                         |     |    |       |       | 687 621.8389 1241.663 2  | 1241.662                | 0.0018   | 0     | 52.54  | 0.00057 K  | VPAANVLSQESK              | A        |   |
|        |                             |                                         |     |    |       |       | 739 647.8364 1293.658 2  | 1293.657                | 0.0017   | 0     | 53.87  | 0.0005 K   | LYEIGAGTSEVR              | R        |   |
|        |                             |                                         |     |    |       |       | 904 778.8908 1537.766 2  | 1537.762                | 0.0031   | 0     | 57.25  | 4.50E-05 R | GSNTC@ELFEDC@K            | V        |   |
|        |                             |                                         |     |    |       |       | 1203 852.4185 2554.234 3 | 2554.23                 | 0.0042   | 0     | 41.54  | 0.0037 K   | LIGS@GALAM@SEPNAGSD@VSM@K | R        |   |
|        |                             |                                         |     |    |       |       | 533 566.7936 1131.573 2  | 1131.571                | 0.0012   | 0     | 59.66  | 0.00017 R  | ALANSLAC@QK               | Y        |   |
|        |                             |                                         |     |    |       |       | 782 666.8545 1331.694 2  | 1331.693                | 0.002    | 0     | 58.66  | 0.00017 K  | GILADESTGSIK              | R        |   |
|        |                             |                                         |     |    |       |       | 874 745.8593 1489.704 2  | 1489.701                | 0.0032   | 0     | 54.13  | 0.00034 R  | LOGSIENTEENR              | R        |   |
|        |                             |                                         |     |    |       |       | 941 834.9185 1667.823 2  | 1667.819                | 0.0036   | 0     | 49.32  | 0.00095 K  | FSNEIEM@ATVTLR            | R        |   |
|        |                             |                                         |     |    |       |       | 967 858.518 1549.652 2   | 1549.649                | 0.002    | 0     | 36.73  | 0.0084 K   | TRP@VAGV@VTLDSASR         | R        |   |
|        |                             |                                         |     |    |       |       | 911 791.9164 1581.818 2  | 1581.815                | 0.0031   | 0     | 95.42  | 2.10E-08 K | IYQVETGAIQIR              | L        |   |
|        |                             |                                         |     |    |       |       | 607 586.3387 1170.663 2  | 1170.661                | 0.002    | 0     | 65.84  | 2.30E-05 K | LGTAAIGAEK                | A        |   |
|        |                             |                                         |     |    |       |       |                          |                         |          |       |        |            |                           |          |   |



|        |                      |                                   |     |          |        |       |        |            |                          |          |          |          |        |       |            |                      |                 |   |
|--------|----------------------|-----------------------------------|-----|----------|--------|-------|--------|------------|--------------------------|----------|----------|----------|--------|-------|------------|----------------------|-----------------|---|
| P15105 | Glutamine synthetase | 179                               | 6   | 6        | 42092  | 6.64  | 1379   | 754.0118   | 2259.014                 | 3        | 2259.008 | 0.0055   | 0      | 33.05 | 0.023 K    | DTYGDDPVSNNQIYFLDR   | F               |   |
|        |                      |                                   |     |          |        |       | 311    | 489.2355   | 976.4565                 | 2        | 976.4535 | 0.0029   | 0      | 37.43 | 0.028 K    | C*IEAIDK             | L               |   |
|        |                      |                                   |     |          |        |       | 465    | 529.269    | 1056.524                 | 2        | 1056.52  | 0.0036   | 0      | 40.58 | 0.0098 M   | #ATSASHLNK           | G               |   |
|        |                      |                                   |     |          |        |       | 1196   | 907.3202   | 1813.826                 | 2        | 1813.819 | 0.0066   | 0      | 65.76 | 1.50E-05 R | TC*LLNETGDFPFQYK     | L               |   |
|        |                      |                                   |     |          |        |       | 1222   | 680.2217   | 1371.943                 | 3        | 1371.937 | 0.0056   | 0      | 52.43 | 0.00047 R  | RPSA@DHYVTEAIVR      | N               |   |
|        |                      |                                   |     |          |        |       | 1227   | 964.9406   | 1927.867                 | 2        | 1927.862 | 0.0045   | 1      | 46.74 | 0.00083 R  | TC*LLNETGDFPFQYK     | -               |   |
|        |                      |                                   |     |          |        |       | 1316   | 717.3494   | 1434.026                 | 3        | 1434.019 | 0.0074   | 0      | 61.52 | 4.50E-05 R | LTGFHETSINDPFSAGVAVR | G               |   |
|        |                      |                                   |     |          |        |       | 559    | 554.7996   | 1107.585                 | 2        | 1107.581 | 0.0035   | 0      | 36.13 | 0.033 K    | IEFGVDVITTK          | E               |   |
|        |                      |                                   |     |          |        |       | 602    | 633.358    | 1266.713                 | 2        | 1266.713 | 0.0043   | 0      | 32.44 | 0.025 R    | ASLILNFK             | E               |   |
|        |                      |                                   |     |          |        |       | 865    | 646.3138   | 1290.649                 | 2        | 1290.646 | 0.0036   | 0      | 41.98 | 0.0087 K   | EYVELLDTGPR          | O               |   |
|        |                      |                                   |     |          |        |       | 942    | 697.3235   | 1392.632                 | 2        | 1392.628 | 0.0046   | 0      | 31.37 | 0.05 K     | AC*GNFGIPC*ELR       | V               |   |
|        |                      |                                   |     |          |        |       | 1121   | 860.9718   | 1719.929                 | 2        | 1719.923 | 0.0061   | 0      | 74.16 | 1.90E-06 K | ITSC*IFOLLQEGAK      | T               |   |
|        |                      |                                   |     |          |        |       | 1139   | 583.2854   | 1166.574                 | 3        | 1166.528 | 0.0063   | 0      | 32.39 | 0.047 R    | VVULMB@GTSLSGHC*EK   | V               |   |
|        |                      |                                   |     |          |        |       | 301    | 486.7732   | 973.547                  | 2        | 973.5287 | 0.005    | 0      | 50.4  | 0.0018 R   | EVGVEK               | L               |   |
|        |                      |                                   |     |          |        |       | 434    | 520.2419   | 1038.469                 | 2        | 1038.466 | 0.0032   | 0      | 39.76 | 0.0093 R   | VC*ALMS*AK           | H               |   |
| 767    | 613.3138             | 1224.613                          | 2   | 1224.61  | 0.0032 | 0     | 34.59  | 0.044 M    | #ASHLELNNGTK             | M        |          |          |        |       |            |                      |                 |   |
| 1050   | 794.4299             | 1586.845                          | 2   | 1586.842 | 0.0037 | 0     | 69.92  | 8.50E-06 K | TIGVSNFNPLOIER           | I        |          |          |        |       |            |                      |                 |   |
| 33     | P62196               | 26S protease regulatory subunit 8 | 763 | 24       | 22     | 45597 | 7.11   | 437        | 579.8311                 | 1157.648 | 3        | 1157.645 | 0.0032 | 0     | 42.97      | 0.006 K              | GVLVYPPGTQK     | T |
|        |                      |                                   |     |          |        |       |        | 563        | 645.803                  | 1289.592 | 2        | 1289.585 | 0.0067 | 0     | 80.36      | 6.20E-07 R           | LEGGSGDSEVQR    | T |
|        |                      |                                   |     |          |        |       |        | 585        | 657.3712                 | 1312.728 | 2        | 1312.724 | 0.0041 | 0     | 84.12      | 2.90E-07 K           | IEELQLVNDK      | S |
|        |                      |                                   |     |          |        |       |        | 597        | 664.3124                 | 1326.61  | 2        | 1326.606 | 0.0043 | 0     | 55.21      | 0.0026 K             | GVC*TEAGMYALR   | E |
|        |                      |                                   |     |          |        |       |        | 626        | 686.8532                 | 1371.712 | 3        | 1371.707 | 0.005  | 0     | 40.53      | 0.0094 K             | IALMPGASGAEVK   | S |
|        |                      |                                   |     |          |        |       |        | 638        | 694.8606                 | 1387.707 | 2        | 1387.702 | 0.0049 | 0     | 49.99      | 0.001 K              | IALM@PGASGAEVK  | G |
|        |                      |                                   |     |          |        |       |        | 662        | 476.5883                 | 1426.683 | 3        | 1426.678 | 0.0056 | 0     | 43.14      | 0.0043 R             | AVAHTDC*TFIR    | V |
|        |                      |                                   |     |          |        |       |        | 667        | 716.8406                 | 1429.667 | 2        | 1429.662 | 0.0046 | 0     | 53.63      | 0.00033 K            | NIDINDVTPNC*R   | R |
|        |                      |                                   |     |          |        |       |        | 677        | 719.8252                 | 1437.836 | 2        | 1437.833 | 0.0056 | 0     | 37.42      | 0.0042 R             | IDLDSALRPRR     | R |
|        |                      |                                   |     |          |        |       |        | 721        | 762.8687                 | 1523.723 | 2        | 1523.718 | 0.0051 | 0     | 85.79      | 2.40E-07 K           | VPSDSTEMIGGLDK  | O |
|        |                      |                                   |     |          |        |       |        | 725        | 770.8664                 | 1539.718 | 2        | 1539.713 | 0.0056 | 0     | 67.35      | 1.50E-05 K           | VPSDSTEM@IGGLDK | O |
|        |                      |                                   |     |          |        |       |        | 730        | 517.2853                 | 1548.834 | 3        | 1548.83  | 0.004  | 0     | 31.91      | 0.041 K              | HPLEFALGIAQPK   | G |
|        |                      |                                   |     |          |        |       |        | 746        | 794.3685                 | 1586.719 | 2        | 1586.713 | 0.0051 | 0     | 73.36      | 2.60E-06 M           | #ALDPEQMELEELGK | A |
|        |                      |                                   |     |          |        |       |        | 749        | 802.3641                 | 1602.714 | 2        | 1602.708 | 0.005  | 0     | 47.15      | 0.00087 M            | #ALDPEQMELEELGK | A |
|        |                      |                                   |     |          |        |       |        | 750        | 535.2664                 | 1602.777 | 3        | 1602.771 | 0.0062 | 0     | 39.42      | 0.012 R              | VHVTOEDFEMAVAK  | V |
| 753    | 540.5975             | 1618.771                          | 3   | 1618.766 | 0.0047 | 0     | 47.86  | 0.0014 R   | VHVTOEDFEM@AVAK          | V        |          |          |        |       |            |                      |                 |   |
| 754    | 810.3937             | 1618.773                          | 2   | 1618.766 | 0.0067 | 0     | 56.99  | 0.00018 R  | VHVTOEDFEM@AVAK          | V        |          |          |        |       |            |                      |                 |   |
| 851    | 911.9691             | 1821.524                          | 2   | 1821.518 | 0.0055 | 0     | 37.92  | 0.012 R    | THALLELDQDFEATK          | N        |          |          |        |       |            |                      |                 |   |
| 856    | 1819.8687            | 3637.919                          | 2   | 3637.913 | 0.0056 | 0     | 58.49  | 0.0001 R   | TM@LELLNLDQDFEATK        | N        |          |          |        |       |            |                      |                 |   |
| 858    | 919.9681             | 1837.922                          | 2   | 1837.913 | 0.0085 | 0     | 95.09  | 2.10E-08 R | TM@LELLNLDQDFEATK        | N        |          |          |        |       |            |                      |                 |   |
| 914    | 1038.538             | 2075.062                          | 2   | 2075.054 | 0.0084 | 0     | 91.34  | 4.10E-08 R | EELQLLQGGSSV@VEVVR       | A        |          |          |        |       |            |                      |                 |   |
| 918    | 702.008              | 2103.002                          | 3   | 2103.994 | 0.0079 | 0     | 35.29  | 0.019 R    | EHPAFISPMDEIDISSGR       | L        |          |          |        |       |            |                      |                 |   |
| 921    | 707.3398             | 2118.988                          | 3   | 2118.989 | 0.0063 | 0     | 48.73  | 0.00051 R  | EHPAFISPMDEIDISSGR       | L        |          |          |        |       |            |                      |                 |   |
| 975    | 745.0378             | 2232.092                          | 3   | 2232.085 | 0.007  | 1     | 38.39  | 0.0084 K   | FVVDVKNIDINDVTPNC*R      | V        |          |          |        |       |            |                      |                 |   |
| 346    | 544.2946             | 1086.575                          | 2   | 1086.571 | 0.0036 | 0     | 48.93  | 0.0022 R   | ATDFVVPQPK               | V        |          |          |        |       |            |                      |                 |   |
| 429    | 577.7705             | 1153.527                          | 2   | 1153.523 | 0.0038 | 0     | 45.01  | 0.0089 K   | SEGGFWAC*K               | N        |          |          |        |       |            |                      |                 |   |
| 466    | 595.7877             | 1189.581                          | 2   | 1189.576 | 0.0047 | 1     | 50.19  | 0.00085 K  | C*ATITPDEKR              | R        |          |          |        |       |            |                      |                 |   |
| 523    | 685.8114             | 1249.608                          | 2   | 1249.605 | 0.0046 | 0     | 51     | 0.00033 K  | LIDDN@VQAM@K             | S        |          |          |        |       |            |                      |                 |   |
| 542    | 633.8092             | 1265.604                          | 2   | 1265.6   | 0.0043 | 0     | 64.8   | 3.50E-05 R | LIDDM@VQAM@K             | S        |          |          |        |       |            |                      |                 |   |
| 611    | 671.3429             | 1340.671                          | 2   | 1340.668 | 0.0028 | 0     | 67.46  | 2.00E-05 K | TVEAAEAHTVTR             | H        |          |          |        |       |            |                      |                 |   |
| 612    | 447.8987             | 1340.674                          | 3   | 1340.668 | 0.006  | 0     | 35.58  | 0.033 K    | TVEAAEAHTVTR             | H        |          |          |        |       |            |                      |                 |   |
| 648    | 699.851              | 1397.807                          | 3   | 1397.803 | 0.0047 | 0     | 72.7   | 5.30E-06 K | LDN@E@SFAK               | L        |          |          |        |       |            |                      |                 |   |
| 722    | 763.3322             | 1524.65                           | 2   | 1524.644 | 0.0056 | 0     | 73.25  | 1.70E-06 R | SDYLNTFEFMDK             | L        |          |          |        |       |            |                      |                 |   |
| 807    | 868.9036             | 1735.793                          | 2   | 1735.787 | 0.0058 | 0     | 74.74  | 2.40E-06 K | IQGSSVEM@QGDEMTR         | I        |          |          |        |       |            |                      |                 |   |
| 813    | 876.9026             | 1751.791                          | 2   | 1751.782 | 0.0089 | 0     | 86.15  | 1.40E-07 K | IQGSSVEM@QGDEMTR         | I        |          |          |        |       |            |                      |                 |   |
| 820    | 884.8986             | 1787.783                          | 2   | 1787.777 | 0.0059 | 0     | 65.28  | 1.50E-05 K | IQGSSVEM@QGDEM@TR        | I        |          |          |        |       |            |                      |                 |   |
| 861    | 919.8687             | 1837.919                          | 2   | 1837.912 | 0.0053 | 0     | 53.94  | 0.00033 K  | GQEG@FMSFAVAK            | D        |          |          |        |       |            |                      |                 |   |
| 876    | 971.9642             | 1941.914                          | 2   | 1941.906 | 0.0074 | 0     | 95.62  | 1.70E-08 K | ALEDVC*ITIEAGFM@TK       | D        |          |          |        |       |            |                      |                 |   |
| 877    | 648.3123             | 1941.915                          | 3   | 1941.906 | 0.0088 | 0     | 42.66  | 0.0032 K   | ALEDVC*ITIEAGFM@TK       | D        |          |          |        |       |            |                      |                 |   |
| 1077   | 876.0377             | 2625.091                          | 3   | 2625.082 | 0.0089 | 0     | 52.82  | 3.40E-05 K | VVTM@VHDFEFGGVA@GM@YNQDK | D        |          |          |        |       |            |                      |                 |   |
| 171    | 171.7107             | 341.458                           | 2   | 341.456  | 0.0032 | 0     | 48.42  | 0.0027 K   | ATDF                     | R        |          |          |        |       |            |                      |                 |   |
| 291    | 522.2791             | 1042.544                          | 2   | 1042.541 | 0.0028 | 0     | 51.42  | 0.001 K    | LDGNQDLR                 | R        |          |          |        |       |            |                      |                 |   |
| 358    | 547.7867             | 1093.559                          | 2   | 1093.556 | 0.0032 | 0     | 48.85  | 0.0017 K   | YFDLGNLPR                | D        |          |          |        |       |            |                      |                 |   |
| 362    | 549.757              | 1097.5                            | 2   | 1097.496 | 0.0031 | 0     | 53.3   | 0.00044 K  | SSGGFWAC*K               | N        |          |          |        |       |            |                      |                 |   |
| 518    | 625.8516             | 1243.889                          | 2   | 1243.885 | 0.0041 | 0     | 72.58  | 5.90E-06 R | LIDDM@VAQVQK             | S        |          |          |        |       |            |                      |                 |   |
| 531    | 630.8489             | 1259.683                          | 2   | 1259.68  | 0.0038 | 0     | 61.72  | 7.70E-05 R | LIDDM@VAQVQK             | S        |          |          |        |       |            |                      |                 |   |
| 532    | 630.849              | 1259.683                          | 2   | 1259.68  | 0.0039 | 0     | 60.07  | 0.00011 R  | LIDDM@VAQVQK             | S        |          |          |        |       |            |                      |                 |   |
| 547    | 637.8973             | 1273.78                           | 2   | 1273.776 | 0.0043 | 0     | 42.15  | 0.00043 K  | LILPHVDVQLK              | L        |          |          |        |       |            |                      |                 |   |
| 617    | 678.352              | 1354.689                          | 2   | 1354.684 | 0.0053 | 0     | 59.93  | 0.0001 K   | TIEAAEAHTVTR             | H        |          |          |        |       |            |                      |                 |   |
| 618    | 452.5705             | 1354.689                          | 3   | 1354.684 | 0.0057 | 0     | 39.71  | 0.012 K    | TIEAAEAHTVTR             | H        |          |          |        |       |            |                      |                 |   |
| 635    | 692.3583             | 1382.702                          | 2   | 1382.698 | 0.0045 | 0     | 50.41  | 0.00085 K  | DLAGC*HGLSNVK            | L        |          |          |        |       |            |                      |                 |   |
| 653    | 705.3443             | 1408.674                          | 2   | 1408.669 | 0.005  | 0     | 100.5  | 8.10E-09 K | VC*VQTVESGAMTK           | D        |          |          |        |       |            |                      |                 |   |
| 660    | 713.3422             | 1424.67                           | 2   | 1424.664 | 0.0058 | 0     | 92.92  | 4.90E-08 K | VC*VQTVESGAMTK           | D        |          |          |        |       |            |                      |                 |   |
| 859    | 616.6396             | 1846.897                          | 3   | 1846.891 | 0.0063 | 0     | 53.35  | 0.00034 R  | DDTNDV@TDSALATQK         | Y        |          |          |        |       |            |                      |                 |   |
| 890    | 624.4559             | 1846.897                          | 3   | 1846.891 | 0.0063 | 0     | 102.47 | 4.20E-09 R | DDTNDV@TDSALATQK         | Y        |          |          |        |       |            |                      |                 |   |
| 869    | 640.9968             | 1919.969                          | 3   | 1919.963 | 0.0058 | 0     | 45.96  | 0.002 K    | MLNHLNTDFDLTK            | Y        |          |          |        |       |            |                      |                 |   |
| 99     | 429.7017             | 857.3889                          | 2   | 857.3854 | 0.0035 | 0     | 32.74  | 0.024 K    | FAAAYC*R                 | S        |          |          |        |       |            |                      |                 |   |
| 187    | 472.2838             | 942.5531                          | 2   | 942.5498 | 0.0033 | 0     | 54.55  | 0.00049 R  | ALIAELTGR                | R        |          |          |        |       |            |                      |                 |   |
| 243    | 520.2337             | 1038.469                          | 2   | 1038.466 | 0.0037 | 0     | 50.18  | 0.00075 R  | YGM@SFAK                 | S        |          |          |        |       |            |                      |                 |   |
| 438    | 590.3088             | 1158.603                          | 2   | 1158.599 | 0.0037 | 1     | 42.84  | 0.008 R    | TREEIQEVR                | A        |          |          |        |       |            |                      |                 |   |
| 470    | 597.2881             | 1192.562                          | 2   | 1192.558 | 0.0036 | 0     | 96.86  | 2.70E-08 R | VDM@DILC*VR              | E        |          |          |        |       |            |                      |                 |   |
| 591    | 660.8557             | 1319.691                          | 2   | 1319.691 | 0.0061 | 0     | 66.33  | 2.40E-05 K | GPILMELQTYR              | Y        |          |          |        |       |            |                      |                 |   |
| 606    | 668.8524             | 1336.69                           | 2   | 1336.686 | 0.0045 | 0     | 57.98  | 0.00016 K  | GPILM@ELQTYR             | Y        |          |          |        |       |            |                      |                 |   |
| 654    | 706.3954             | 1410.772                          | 2   | 1410.772 | 0.0045 | 0     | 60.86  | 4.70E-05 R | LEEPPVTVLQTYR            | E        |          |          |        |       |            |                      |                 |   |
| 655    | 706.3959             | 1410.772                          | 2   | 1410.772 | 0.0053 | 0     | 65.94  | 1.60E-05 R | LEEPPVTVLQTYR            | E        |          |          |        |       |            |                      |                 |   |
| 669    | 717.3712             | 1432.728                          | 2   | 1432.723 | 0.0046 | 0     | 35.65  | 0.028 R    | MVNSNLASVEELK            | E        |          |          |        |       |            |                      |                 |   |
| 671    | 718.3469             | 1434.679                          | 2   | 1434.675 | 0.0045 | 0     | 41.29  | 0.0064 K   | LPC*IFIC*ENNR            | D        |          |          |        |       |            |                      |                 |   |
| 1016   | 764.0609             | 2288.161                          | 3   | 2289.152 | 0.0087 | 1     | 65.61  | 1.20E-05 K | M@VNSNLASVEELK@DEIVR     | Y        |          |          |        |       |            |                      |                 |   |
| 1058   | 783.0818             | 2346.224                          | 3   | 2346.215 | 0.0081 | 0     | 40.49  | 0.00037 K  | NFYGG@VQAGV@PLGAGIALC*AK | Y        |          |          |        |       |            |                      |                 |   |
| 49     | 406.2209             | 810.4272                          | 2   | 810.4236 | 0.0037 | 0     | 50.12  | 0.0012 R   | VPV@PDR                  | F        |          |          |        |       |            |                      |                 |   |
| 327    | 533.8381             | 1065.658                          | 2   | 1065.655 | 0.0029 | 0     | 30.9   | 0.01 K     | IGIVL@PNVQK              | S        |          |          |        |       |            |                      |                 |   |
| 335    | 537.7759             | 1073.537                          | 2   | 1073.535 | 0.0019 | 0     | 64.69  | 5.90E-05 K | LOELSAEER                | Q        |          |          |        |       |            |                      |                 |   |
| 551    | 425.2522             | 1275.735                          | 2   | 1275.73  | 0.0049 | 0     | 34.05  | 0.015 K    | GDM@KPPHIGR              | F        |          |          |        |       |            |                      |                 |   |
| 696    | 733.744              | 1464.734                          | 2   | 1464.728 | 0.0061 | 0     | 68.23  | 1.50E-05 K | YLEANM@TQSALPK           | F        |          |          |        |       |            |                      |                 |   |
| 704    | 741.3714             | 1480.728                          | 2   | 1480.723 | 0.0051 | 0     | 38.85  | 0.012 K    | YLEANM@TQSALPK           | F        |          |          |        |       |            |                      |                 |   |
| 735    | 784.9766             | 1567.939                          | 2   | 1567.934 | 0.0048 | 0     | 87.54  | 2.00E-08 K | IPAFILNV@DIAGLQK         | I        |          |          |        |       |            |                      |                 |   |
| 737    | 786.8041             | 1571.794                          | 2   | 1571.787 | 0.0084 | 0     | 81.71  | 5.40E-07 R | NVIVED@GDFFK             | F        |          |          |        |       |            |                      |                 |   |
| 781    | 544.2477             | 1629.721                          | 2   | 1629.716 | 0.0056 | 0     | 34.92  | 0.01       |                          |          |          |          |        |       |            |                      |                 |   |



|  |        |              |     |    |    |       |      |  |  |      |          |          |   |          |        |   |        |          |   |                              |   |
|--|--------|--------------|-----|----|----|-------|------|--|--|------|----------|----------|---|----------|--------|---|--------|----------|---|------------------------------|---|
|  |        |              |     |    |    |       |      |  |  | 855  | 713.931  | 1425.848 | 2 | 1425.842 | 0.0057 | 0 | 33.48  | 0.0096   | R | MPPIVQAFGLK                  | R |
|  |        |              |     |    |    |       |      |  |  | 871  | 721.928  | 1441.842 | 2 | 1441.837 | 0.0048 | 0 | 32.37  | 0.017    | R | M@PIVQAFGLK                  | R |
|  |        |              |     |    |    |       |      |  |  | 872  | 721.9281 | 1441.842 | 2 | 1441.837 | 0.005  | 0 | 65.17  | 9.00E-06 | R | M@PIVQAFGLK                  | R |
|  |        |              |     |    |    |       |      |  |  | 874  | 721.9283 | 1441.842 | 2 | 1441.837 | 0.0053 | 0 | 39.17  | 0.0038   | R | M@PIVQAFGLK                  | R |
|  |        |              |     |    |    |       |      |  |  | 875  | 721.9283 | 1441.842 | 2 | 1441.837 | 0.0054 | 0 | 72.33  | 1.90E-06 | R | M@PIVQAFGLK                  | R |
|  |        |              |     |    |    |       |      |  |  | 943  | 749.3918 | 1496.769 | 2 | 1496.762 | 0.0068 | 1 | 47.64  | 0.0017   | K | VPTDKYGAQVTR                 | S |
|  |        |              |     |    |    |       |      |  |  | 945  | 500.2936 | 1497.859 | 3 | 1497.856 | 0.0036 | 0 | 33.33  | 0.016    | K | VAALTLGPFVTPAK               | F |
|  |        |              |     |    |    |       |      |  |  | 946  | 749.9379 | 1497.861 | 2 | 1497.856 | 0.0057 | 0 | 83.49  | 1.70E-07 | K | VAALTLGPFVTPAK               | F |
|  |        |              |     |    |    |       |      |  |  | 950  | 752.8699 | 1503.725 | 2 | 1503.721 | 0.0013 | 0 | 37.08  | 0.017    | R | AAAEVNOEYGLDPK               | I |
|  |        |              |     |    |    |       |      |  |  | 952  | 752.8698 | 1503.725 | 2 | 1503.721 | 0.0044 | 0 | 41.54  | 0.0059   | R | AAAEVNOEYGLDPK               | I |
|  |        |              |     |    |    |       |      |  |  | 954  | 752.8699 | 1503.725 | 2 | 1503.721 | 0.0047 | 0 | 86.18  | 2.20E-07 | R | AAAEVNOEYGLDPK               | I |
|  |        |              |     |    |    |       |      |  |  | 955  | 752.8707 | 1503.727 | 2 | 1503.721 | 0.0063 | 0 | 47.42  | 0.0018   | R | AAAEVNOEYGLDPK               | I |
|  |        |              |     |    |    |       |      |  |  | 956  | 752.8707 | 1503.727 | 2 | 1503.721 | 0.0063 | 0 | 91.11  | 7.60E-08 | R | AAAEVNOEYGLDPK               | I |
|  |        |              |     |    |    |       |      |  |  | 957  | 753.3731 | 1504.732 | 2 | 1503.721 | 0.0054 | 1 | 72.1   | 1.01E-12 | R | AAAEVNOEYGLDPK               | I |
|  |        |              |     |    |    |       |      |  |  | 1017 | 528.3228 | 1581.947 | 3 | 1581.943 | 0.0037 | 1 | 24.01  | 0.039    | R | MPPIVQAFGLKR                 | A |
|  |        |              |     |    |    |       |      |  |  | 1018 | 528.3229 | 1581.947 | 3 | 1581.943 | 0.0039 | 1 | 27.8   | 0.016    | R | MPPIVQAFGLKR                 | A |
|  |        |              |     |    |    |       |      |  |  | 1019 | 791.981  | 1581.948 | 2 | 1581.943 | 0.0046 | 0 | 33.91  | 0.004    | R | MPPIVQAFGLKR                 | A |
|  |        |              |     |    |    |       |      |  |  | 1027 | 799.9785 | 1597.942 | 2 | 1597.938 | 0.0046 | 0 | 28.9   | 0.024    | R | M@PIVQAFGLKR                 | A |
|  |        |              |     |    |    |       |      |  |  | 1028 | 533.6548 | 1597.943 | 2 | 1597.938 | 0.0047 | 1 | 54.37  | 4.30E-05 | R | M@PIVQAFGLKR                 | A |
|  |        |              |     |    |    |       |      |  |  | 1126 | 862.9434 | 1723.872 | 2 | 1723.867 | 0.0053 | 1 | 79.23  | 1.00E-06 | R | VEFDTFGELKVPTDK              | Y |
|  |        |              |     |    |    |       |      |  |  | 1128 | 575.6324 | 1723.876 | 3 | 1723.867 | 0.0061 | 1 | 42.32  | 0.0047   | R | VEFDTFGELKVPTDK              | Y |
|  |        |              |     |    |    |       |      |  |  | 1150 | 882.4706 | 1762.927 | 2 | 1762.921 | 0.0054 | 0 | 93.78  | 2.60E-08 | R | IYELAAGTAVGTGLNTR            | I |
|  |        |              |     |    |    |       |      |  |  | 1152 | 588.6497 | 1762.927 | 2 | 1762.921 | 0.0058 | 0 | 70.97  | 5.20E-06 | R | IYELAAGTAVGTGLNTR            | I |
|  |        |              |     |    |    |       |      |  |  | 1153 | 882.4709 | 1762.927 | 2 | 1762.921 | 0.0059 | 0 | 113.98 | 2.60E-10 | R | IYELAAGTAVGTGLNTR            | I |
|  |        |              |     |    |    |       |      |  |  | 1154 | 588.6497 | 1762.927 | 2 | 1762.921 | 0.006  | 0 | 56.18  | 0.00016  | R | IYELAAGTAVGTGLNTR            | I |
|  |        |              |     |    |    |       |      |  |  | 1155 | 882.4711 | 1762.928 | 2 | 1762.921 | 0.0062 | 0 | 112.36 | 3.80E-10 | R | IYELAAGTAVGTGLNTR            | I |
|  |        |              |     |    |    |       |      |  |  | 1156 | 588.6498 | 1762.928 | 2 | 1762.921 | 0.0063 | 0 | 55.69  | 0.00018  | R | IYELAAGTAVGTGLNTR            | I |
|  |        |              |     |    |    |       |      |  |  | 1157 | 882.4711 | 1762.928 | 2 | 1762.921 | 0.0063 | 0 | 108.73 | 8.70E-10 | R | IYELAAGTAVGTGLNTR            | I |
|  |        |              |     |    |    |       |      |  |  | 1158 | 588.6499 | 1762.928 | 2 | 1762.921 | 0.0065 | 0 | 84.58  | 2.30E-07 | R | IYELAAGTAVGTGLNTR            | I |
|  |        |              |     |    |    |       |      |  |  | 1159 | 882.4716 | 1762.929 | 2 | 1762.921 | 0.0073 | 0 | 140.39 | 5.80E-13 | R | IYELAAGTAVGTGLNTR            | I |
|  |        |              |     |    |    |       |      |  |  | 1180 | 882.4719 | 1762.929 | 2 | 1762.921 | 0.0079 | 0 | 31.29  | 0.046    | R | IYELAAGTAVGTGLNTR            | I |
|  |        |              |     |    |    |       |      |  |  | 1181 | 882.4719 | 1762.929 | 2 | 1762.921 | 0.0079 | 0 | 36.37  | 0.014    | R | IYELAAGTAVGTGLNTR            | I |
|  |        |              |     |    |    |       |      |  |  | 1314 | 1063.049 | 2124.083 | 2 | 2124.077 | 0.0059 | 0 | 46.51  | 0.0012   | R | SGLGELLPENEGSSIMPPK          | V |
|  |        |              |     |    |    |       |      |  |  | 1316 | 1063.049 | 2124.084 | 2 | 2124.077 | 0.0068 | 0 | 58.74  | 7.60E-05 | R | SGLGELLPENEGSSIMPPK          | V |
|  |        |              |     |    |    |       |      |  |  | 1317 | 1063.049 | 2124.084 | 2 | 2124.077 | 0.0071 | 0 | 51.6   | 0.0004   | R | SGLGELLPENEGSSIMPPK          | V |
|  |        |              |     |    |    |       |      |  |  | 1322 | 1071.047 | 2140.079 | 2 | 2140.072 | 0.0073 | 0 | 56.6   | 0.00015  | R | SGLGELLPENEGSSIMPPK          | V |
|  |        |              |     |    |    |       |      |  |  | 1324 | 1071.048 | 2140.08  | 2 | 2140.072 | 0.0083 | 0 | 44.51  | 0.0023   | R | SGLGELLPENEGSSIMPPK          | V |
|  |        |              |     |    |    |       |      |  |  | 1326 | 1071.048 | 2140.081 | 2 | 2140.072 | 0.0087 | 0 | 39.56  | 0.0071   | R | SGLGELLPENEGSSIMPPK          | V |
|  |        |              |     |    |    |       |      |  |  | 1327 | 714.3677 | 2140.081 | 3 | 2140.072 | 0.009  | 0 | 49.93  | 0.0051   | R | SGLGELLPENEGSSIMPPK          | V |
|  |        |              |     |    |    |       |      |  |  | 1387 | 753.7245 | 2258.152 | 3 | 2258.144 | 0.0078 | 0 | 74.92  | 1.70E-06 | K | LMNESLMLVLTALNPHIGYDK        | A |
|  |        |              |     |    |    |       |      |  |  | 1394 | 759.056  | 2274.146 | 3 | 2274.139 | 0.0075 | 0 | 83.94  | 2.70E-07 | K | LMNESLMLVLTALNPHIGYDK        | A |
|  |        |              |     |    |    |       |      |  |  | 1395 | 759.056  | 2274.146 | 3 | 2274.139 | 0.0075 | 0 | 71.01  | 4.40E-06 | K | LMNESLMLVLTALNPHIGYDK        | A |
|  |        |              |     |    |    |       |      |  |  | 1396 | 759.0561 | 2274.146 | 3 | 2274.139 | 0.0077 | 0 | 45.58  | 0.0015   | K | LMNESLMLVLTALNPHIGYDK        | A |
|  |        |              |     |    |    |       |      |  |  | 1397 | 759.0563 | 2274.147 | 3 | 2274.139 | 0.0084 | 0 | 81.21  | 4.30E-07 | K | LMNESLMLVLTALNPHIGYDK        | A |
|  |        |              |     |    |    |       |      |  |  | 1398 | 1138.081 | 2274.147 | 2 | 2274.139 | 0.0085 | 0 | 60.47  | 5.20E-05 | K | LMNESLMLVLTALNPHIGYDK        | A |
|  |        |              |     |    |    |       |      |  |  | 1399 | 759.0564 | 2274.147 | 3 | 2274.139 | 0.0086 | 0 | 53.49  | 0.00028  | K | LMNESLMLVLTALNPHIGYDK        | A |
|  |        |              |     |    |    |       |      |  |  | 1411 | 764.387  | 2290.139 | 3 | 2290.134 | 0.0054 | 0 | 66.3   | 1.50E-05 | K | LM@NESLMLVLTALNPHIGYDK       | A |
|  |        |              |     |    |    |       |      |  |  | 1412 | 764.3873 | 2290.14  | 3 | 2290.134 | 0.0063 | 0 | 33.78  | 0.027    | K | LM@NESLMLVLTALNPHIGYDK       | A |
|  |        |              |     |    |    |       |      |  |  | 1413 | 764.3875 | 2290.141 | 3 | 2290.134 | 0.0068 | 0 | 63.59  | 2.70E-05 | K | LM@NESLMLVLTALNPHIGYDK       | A |
|  |        |              |     |    |    |       |      |  |  | 1414 | 764.3875 | 2290.141 | 3 | 2290.134 | 0.0068 | 0 | 65.54  | 1.70E-05 | K | LM@NESLMLVLTALNPHIGYDK       | A |
|  |        |              |     |    |    |       |      |  |  | 1415 | 764.3875 | 2290.141 | 3 | 2290.134 | 0.007  | 0 | 59.67  | 6.70E-05 | K | LM@NESLMLVLTALNPHIGYDK       | A |
|  |        |              |     |    |    |       |      |  |  | 1416 | 573.5427 | 2290.142 | 4 | 2290.134 | 0.0078 | 0 | 32.99  | 0.031    | K | LM@NESLMLVLTALNPHIGYDK       | A |
|  |        |              |     |    |    |       |      |  |  | 1417 | 764.3881 | 2290.143 | 3 | 2290.134 | 0.0088 | 0 | 92.9   | 3.00E-08 | K | LM@NESLMLVLTALNPHIGYDK       | A |
|  |        |              |     |    |    |       |      |  |  | 1418 | 1146.079 | 2290.143 | 2 | 2290.134 | 0.009  | 0 | 48.67  | 0.0008   | K | LM@NESLMLVLTALNPHIGYDK       | A |
|  |        |              |     |    |    |       |      |  |  | 1461 | 781.0483 | 2340.123 | 3 | 2340.117 | 0.0057 | 0 | 53.94  | 0.00013  | K | SOSSNDTFFPTAM@HIAAAVEVHK     | V |
|  |        |              |     |    |    |       |      |  |  | 1474 | 786.3802 | 2356.119 | 3 | 2356.112 | 0.007  | 0 | 37.13  | 0.012    | K | SOSSNDTFFPTAM@HIAAAVEVHK     | V |
|  |        |              |     |    |    |       |      |  |  | 1475 | 786.3802 | 2356.119 | 3 | 2356.112 | 0.0072 | 0 | 34.93  | 0.019    | K | SOSSNDTFFPTAM@HIAAAVEVHK     | V |
|  |        |              |     |    |    |       |      |  |  | 1476 | 786.3803 | 2356.119 | 3 | 2356.112 | 0.0073 | 0 | 67.04  | 1.20E-05 | K | SOSSNDTFFPTAM@HIAAAVEVHK     | V |
|  |        |              |     |    |    |       |      |  |  | 1528 | 823.9875 | 2486.241 | 2 | 2486.232 | 0.0087 | 0 | 41.46  | 0.0031   | K | ETAI@DLYTAEQFVGVKPK          | V |
|  |        |              |     |    |    |       |      |  |  | 1540 | 913.1079 | 2736.302 | 3 | 2736.292 | 0.0088 | 0 | 43.57  | 0.0016   | K | FEALAAHDALVLSGAM@NTAAC@SLM@K | D |
|  |        |              |     |    |    |       |      |  |  | 1544 | 918.4393 | 2752.296 | 3 | 2752.287 | 0.0092 | 0 | 45.74  | 0.0011   | K | FEALAAHDALVLSGAM@NTAAC@SLM@K | D |
|  |        |              |     |    |    |       |      |  |  | 1545 | 918.4396 | 2752.297 | 3 | 2752.287 | 0.0099 | 0 | 60.42  | 4.20E-05 | K | FEALAAHDALVLSGAM@NTAAC@SLM@K | D |
|  |        |              |     |    |    |       |      |  |  | 1565 | 1061.527 | 3181.559 | 3 | 3181.55  | 0.0088 | 0 | 52.56  | 0.00018  | R | THTDQVPLTLOQFSGYVQDQVYAM@VTR | I |
|  |        |              |     |    |    |       |      |  |  | 1622 | 822.4057 | 3285.584 | 3 | 3285.584 | 0.01   | 0 | 53.94  | 0.00013  | K | LNDF@LVWGTGSGTQTM@VNVNEVSR   | I |
|  | P21550 | Beta-enolase | 539 | 13 | 10 | 46995 | 6.73 |  |  | 482  | 567.7948 | 1133.575 | 2 | 1133.572 | 0.0034 | 0 | 72.98  | 8.60E-06 | K | TAQAAQYDK                    | V |
|  |        |              |     |    |    |       |      |  |  | 542  | 389.55   | 1165.628 | 3 | 1165.624 | 0.0037 | 0 | 40.56  | 0.0075   | R | IGAEVYHHLK                   | G |
|  |        |              |     |    |    |       |      |  |  | 809  | 460.9105 | 1379.71  | 3 | 1379.705 | 0.0051 | 0 | 33.61  | 0.043    | R | GNPTEVLDHTAK                 | G |
|  |        |              |     |    |    |       |      |  |  | 999  | 478.8951 | 1555.776 | 2 | 1555.771 | 0.0051 | 0 | 77.83  | 1.50E-06 | K | VNIG@VAAEFYR                 | N |
|  |        |              |     |    |    |       |      |  |  | 1004 | 786.8929 | 1571.771 | 2 | 1571.765 | 0.0058 | 0 | 57.38  | 0.00017  | K | VNIG@VAAEFYR                 | N |
|  |        |              |     |    |    |       |      |  |  | 1048 | 817.4174 | 1632.82  | 2 | 1632.814 | 0.006  | 0 | 105.23 | 3.10E-09 | K | VNOIGSVTESIQAK               | L |
|  |        |              |     |    |    |       |      |  |  | 1206 | 602.3212 | 1803.942 | 3 | 1803.937 | 0.0052 | 0 | 44.49  | 0.0022   | R | AAVPSGASTGVEALELR            | D |
|  |        |              |     |    |    |       |      |  |  | 1207 | 902.9785 | 1803.942 | 3 | 1803.937 | 0.0058 | 0 | 97.93  | 1.10E-08 | R | AAVPSGASTGVEALELR            | D |
|  |        |              |     |    |    |       |      |  |  | 1243 | 942.9863 | 1883.958 | 2 | 1883.953 | 0.0055 | 0 | 43.28  | 0.001    | K | LAM@QEFM@ILPVGASSFK          | E |
|  |        |              |     |    |    |       |      |  |  | 1244 | 942.9868 | 1883.959 | 2 | 1883.953 | 0.0064 | 0 | 62.21  | 4.00E-05 | K | LAM@QEFM@ILPVGASSFK          | E |
|  |        |              |     |    |    |       |      |  |  | 1249 | 634.3253 | 1899.954 | 3 | 1899.947 | 0.0067 | 0 | 33.81  | 0.031    | K | LAM@QEFM@ILPVGASSFK          | E |
|  |        |              |     |    |    |       |      |  |  | 1250 | 950.9845 | 1899.954 | 2 | 1899.947 | 0.007  | 0 | 68.58  | 1        |   |                              |   |

|  |  |  |  |  |  |      |          |          |   |          |        |   |        |          |   |                            |   |
|--|--|--|--|--|--|------|----------|----------|---|----------|--------|---|--------|----------|---|----------------------------|---|
|  |  |  |  |  |  | 657  | 601.336  | 1200.657 | 2 | 1200.654 | 0.0038 | 0 | 49.59  | 0.0013   | K | IQLNNMLDK                  | V |
|  |  |  |  |  |  | 672  | 609.336  | 1216.653 | 2 | 1216.649 | 0.004  | 0 | 41.74  | 0.0088   | K | IQLNNM@LDK                 | V |
|  |  |  |  |  |  | 869  | 684.3604 | 1366.706 | 2 | 1366.703 | 0.0036 | 0 | 46.32  | 0.0023   | R | AHSSM@GVNLPQK              | A |
|  |  |  |  |  |  | 870  | 684.3608 | 1366.707 | 2 | 1366.703 | 0.0043 | 0 | 60.17  | 9.50E-05 | R | AHSSM@GVNLPQK              | A |
|  |  |  |  |  |  | 871  | 456.5766 | 1366.708 | 2 | 1366.703 | 0.0052 | 0 | 39.95  | 0.01     | R | AHSSM@GVNLPQK              | A |
|  |  |  |  |  |  | 884  | 692.3581 | 1382.702 | 2 | 1382.698 | 0.004  | 0 | 60.58  | 8.40E-05 | R | AHSSM@GVNLPQK              | A |
|  |  |  |  |  |  | 885  | 692.3582 | 1382.702 | 2 | 1382.698 | 0.0042 | 0 | 46.51  | 0.0021   | R | AHSSM@GVNLPQK              | A |
|  |  |  |  |  |  | 889  | 461.9081 | 1382.702 | 2 | 1382.698 | 0.0048 | 0 | 53.6   | 0.00041  | R | AHSSM@GVNLPQK              | A |
|  |  |  |  |  |  | 1060 | 817.9024 | 1633.791 | 2 | 1633.785 | 0.0054 | 0 | 61.43  | 7.80E-05 | K | LDGVYVNDVAFGTAHR           | A |
|  |  |  |  |  |  | 1061 | 545.6041 | 1633.791 | 2 | 1633.785 | 0.0055 | 0 | 66.6   | 2.40E-05 | K | LDGVYVNDVAFGTAHR           | A |
|  |  |  |  |  |  | 1062 | 817.9026 | 1633.791 | 2 | 1633.785 | 0.0059 | 0 | 92.41  | 6.10E-08 | K | LDGVYVNDVAFGTAHR           | A |
|  |  |  |  |  |  | 1063 | 545.6043 | 1633.791 | 2 | 1633.785 | 0.0062 | 0 | 42.97  | 0.005    | K | LDGVYVNDVAFGTAHR           | A |
|  |  |  |  |  |  | 1158 | 580.9716 | 1739.913 | 3 | 1739.905 | 0.0056 | 0 | 41.33  | 0.0047   | K | VSHVSTGGGSELELEK           | V |
|  |  |  |  |  |  | 1161 | 872.447  | 1742.88  | 3 | 1742.874 | 0.0057 | 0 | 44.5   | 0.0023   | K | VNEMIGGGM@AFTFLK           | V |
|  |  |  |  |  |  | 1162 | 872.4473 | 1742.88  | 3 | 1742.874 | 0.0064 | 0 | 55.63  | 0.00027  | K | VNEMIGGGM@AFTFLK           | V |
|  |  |  |  |  |  | 1168 | 585.6021 | 1753.785 | 3 | 1753.78  | 0.0047 | 0 | 49.47  | 0.00061  | R | GC'TIIGGGDTATC'CAK         | W |
|  |  |  |  |  |  | 1169 | 877.8998 | 1753.785 | 3 | 1753.78  | 0.0054 | 0 | 98.02  | 8.30E-09 | R | GC'TIIGGGDTATC'CAK         | W |
|  |  |  |  |  |  | 1170 | 877.9002 | 1753.786 | 3 | 1753.78  | 0.0061 | 0 | 70.43  | 5.10E-06 | R | GC'TIIGGGDTATC'CAK         | W |
|  |  |  |  |  |  | 1171 | 877.9007 | 1753.787 | 3 | 1753.78  | 0.0071 | 0 | 68.55  | 7.50E-06 | R | GC'TIIGGGDTATC'CAK         | W |
|  |  |  |  |  |  | 1175 | 880.4442 | 1758.874 | 3 | 1758.869 | 0.0054 | 0 | 65.78  | 2.40E-05 | K | VNEM@IIGGGM@AFTFLK         | V |
|  |  |  |  |  |  | 1176 | 587.2987 | 1758.874 | 3 | 1758.869 | 0.0058 | 0 | 40.85  | 0.0077   | K | VNEM@IIGGGM@AFTFLK         | V |
|  |  |  |  |  |  | 1185 | 590.3386 | 1767.994 | 3 | 1767.988 | 0.0056 | 0 | 33.39  | 0.0096   | K | ALESPPRFLALGGAK            | V |
|  |  |  |  |  |  | 1186 | 595.0043 | 1767.994 | 3 | 1767.988 | 0.0057 | 0 | 33.1   | 0.01     | K | ALESPPRFLALGGAK            | V |
|  |  |  |  |  |  | 1187 | 590.3386 | 1767.994 | 3 | 1767.988 | 0.0058 | 0 | 35.56  | 0.0058   | K | ALESPPRFLALGGAK            | V |
|  |  |  |  |  |  | 1188 | 590.3388 | 1767.995 | 3 | 1767.988 | 0.0063 | 0 | 30.18  | 0.018    | K | ALESPPRFLALGGAK            | V |
|  |  |  |  |  |  | 1190 | 885.0049 | 1767.995 | 3 | 1767.988 | 0.0069 | 0 | 68.35  | 2.70E-06 | K | ALESPPRFLALGGAK            | V |
|  |  |  |  |  |  | 1204 | 651.6528 | 1981.939 | 3 | 1981.93  | 0.0064 | 0 | 32.08  | 0.042    | K | VLLNMGITSLYDEEGAK          | I |
|  |  |  |  |  |  | 1305 | 991.9767 | 1981.939 | 3 | 1981.93  | 0.0087 | 0 | 53.82  | 0.00027  | K | VLLNMGITSLYDEEGAK          | I |
|  |  |  |  |  |  | 1314 | 666.9846 | 1997.932 | 3 | 1997.925 | 0.0067 | 0 | 51.55  | 0.00041  | K | VLLNMG@EIGTSLYDEEGAK       | I |
|  |  |  |  |  |  | 1315 | 999.9734 | 1997.932 | 3 | 1997.925 | 0.0072 | 0 | 73.2   | 2.90E-06 | K | VLLNMG@EIGTSLYDEEGAK       | I |
|  |  |  |  |  |  | 1327 | 1012.027 | 2022.038 | 3 | 2022.031 | 0.0074 | 1 | 86.53  | 1.40E-07 | K | ITPLVDFVADKFDENAK          | T |
|  |  |  |  |  |  | 1334 | 673.0225 | 2034.046 | 3 | 2034.039 | 0.0067 | 0 | 44.44  | 0.0023   | K | SVLLMSHLGRPDGVP@PK         | Y |
|  |  |  |  |  |  | 1346 | 684.354  | 2050.04  | 3 | 2050.034 | 0.0062 | 0 | 45.9   | 0.0098   | K | SVLLMSHLGRPDGVP@PK         | Y |
|  |  |  |  |  |  | 1348 | 684.3541 | 2050.04  | 3 | 2050.034 | 0.0064 | 0 | 38.35  | 0.0092   | K | SVLLMSHLGRPDGVP@PK         | Y |
|  |  |  |  |  |  | 1517 | 833.052  | 2496.134 | 3 | 2496.126 | 0.0081 | 0 | 60.54  | 2.80E-05 | K | TGQATVASGIPAGW@GLDC'GTESK  | R |
|  |  |  |  |  |  | 45   | 402.7542 | 803.489  | 2 | 803.4905 | 0.0034 | 0 | 38.4   | 0.01     | R | GVFVAAK                    | R |
|  |  |  |  |  |  | 322  | 497.2608 | 992.5056 | 2 | 992.5039 | 0.0037 | 0 | 48.95  | 0.0022   | R | YALOSQR                    | W |
|  |  |  |  |  |  | 520  | 562.3126 | 1122.611 | 2 | 1122.607 | 0.0032 | 0 | 51.44  | 0.00066  | R | TPFGAYGGLLK                | D |
|  |  |  |  |  |  | 635  | 594.8478 | 1187.881 | 2 | 1187.878 | 0.0036 | 0 | 34.13  | 0.022    | R | ITAHVHLER                  | R |
|  |  |  |  |  |  | 636  | 396.9014 | 1187.881 | 2 | 1187.878 | 0.0048 | 0 | 40.17  | 0.0056   | R | ITAHVHLER                  | R |
|  |  |  |  |  |  | 639  | 396.9016 | 1187.883 | 2 | 1187.878 | 0.0055 | 0 | 36.2   | 0.014    | R | ITAHVHLER                  | R |
|  |  |  |  |  |  | 838  | 673.8463 | 1345.678 | 2 | 1345.673 | 0.0046 | 0 | 71.94  | 7.70E-06 | K | LPMGMTAENLAAK              | Y |
|  |  |  |  |  |  | 860  | 681.8433 | 1361.672 | 2 | 1361.668 | 0.0037 | 0 | 44.43  | 0.0043   | K | LPMGM@TAENLAAK             | Y |
|  |  |  |  |  |  | 861  | 681.8436 | 1361.673 | 2 | 1361.668 | 0.0043 | 0 | 43.96  | 0.0048   | K | LPMGM@TAENLAAK             | Y |
|  |  |  |  |  |  | 878  | 689.8408 | 1377.667 | 2 | 1377.663 | 0.0039 | 0 | 60.98  | 0.0017   | K | LPMGM@TAENLAAK             | Y |
|  |  |  |  |  |  | 948  | 714.3986 | 1426.783 | 2 | 1426.778 | 0.0047 | 0 | 92.43  | 3.60E-08 | R | VGVPETGALTNR               | L |
|  |  |  |  |  |  | 968  | 722.3442 | 1442.674 | 2 | 1442.668 | 0.0062 | 0 | 53.54  | 0.00038  | K | DFSATDLTEFAAR              | A |
|  |  |  |  |  |  | 1220 | 904.4774 | 1806.94  | 2 | 1806.934 | 0.0065 | 0 | 84.33  | 2.40E-07 | K | TNVSGGAILGPHLGGSGSR        | I |
|  |  |  |  |  |  | 1221 | 904.4774 | 1806.94  | 2 | 1806.934 | 0.0067 | 0 | 71.46  | 4.80E-06 | K | TNVSGGAILGPHLGGSGSR        | I |
|  |  |  |  |  |  | 1302 | 661.6458 | 1981.916 | 3 | 1981.909 | 0.0065 | 0 | 50.51  | 0.00051  | K | AANEAGYFNEEM@PIEVK         | T |
|  |  |  |  |  |  | 1303 | 991.9653 | 1981.916 | 3 | 1981.909 | 0.007  | 0 | 81.01  | 4.40E-07 | K | AANEAGYFNEEM@PIEVK         | T |
|  |  |  |  |  |  | 1312 | 999.9622 | 1997.91  | 3 | 1997.904 | 0.0058 | 0 | 69.51  | 5.60E-06 | K | AANEAGYFNEEM@PIEVK         | T |
|  |  |  |  |  |  | 1313 | 666.9775 | 1997.91  | 3 | 1997.904 | 0.0068 | 0 | 51.37  | 0.00037  | K | AANEAGYFNEEM@PIEVK         | T |
|  |  |  |  |  |  | 369  | 658.98   | 2115.949 | 2 | 2115.939 | 0.0071 | 0 | 87.99  | 8.90E-08 | K | LC'GSGFQVSGC'QEC'SK        | D |
|  |  |  |  |  |  | 1370 | 706.3229 | 2115.947 | 2 | 2115.939 | 0.008  | 0 | 45.56  | 0.0012   | R | LC'GSGFQVSGC'QEC'SK        | D |
|  |  |  |  |  |  | 1445 | 1148.566 | 2295.117 | 2 | 2295.109 | 0.0077 | 0 | 84.04  | 2.10E-07 | K | DM@DLIDVNEAFAP@LSVQK       | A |
|  |  |  |  |  |  | 1455 | 766.0465 | 2295.118 | 2 | 2295.109 | 0.0084 | 0 | 40.45  | 0.0058   | K | DM@DLIDVNEAFAP@LSVQK       | A |
|  |  |  |  |  |  | 1494 | 782.3481 | 2344.022 | 2 | 2344.013 | 0.009  | 0 | 32.52  | 0.016    | K | DAN@C'GOTESMS@QVYK         | A |
|  |  |  |  |  |  | 1520 | 844.7549 | 2531.243 | 2 | 2531.235 | 0.0079 | 0 | 82.86  | 2.30E-07 | K | DGTVTAGNAGVSDGAGAVIASEDAVK | K |
|  |  |  |  |  |  | 1521 | 844.755  | 2531.243 | 2 | 2531.235 | 0.0081 | 0 | 42.87  | 0.0024   | K | DGTVTAGNAGVSDGAGAVIASEDAVK | K |
|  |  |  |  |  |  | 1522 | 1266.629 | 2531.244 | 2 | 2531.235 | 0.0089 | 0 | 124.87 | 1.50E-11 | K | DGTVTAGNAGVSDGAGAVIASEDAVK | K |
|  |  |  |  |  |  | 1537 | 887.4529 | 2659.337 | 2 | 2659.33  | 0.0069 | 1 | 59.99  | 4.10E-05 | K | DGTVTAGNAGVSDGAGAVIASEDAVK | H |
|  |  |  |  |  |  | 1544 | 916.811  | 2747.411 | 2 | 2747.403 | 0.0084 | 0 | 50.12  | 0.0015   | K | VYV@SGC'DP@TM@GIGVPA@NGALK | K |
|  |  |  |  |  |  | 11   | 379.2339 | 756.4532 | 2 | 756.4494 | 0.0039 | 0 | 43.39  | 0.0066   | K | IENLR                      | L |
|  |  |  |  |  |  | 417  | 529.2778 | 1056.541 | 2 | 1056.539 | 0.0025 | 0 | 46.01  | 0.0032   | R | GLSLPPAC'SR                | A |
|  |  |  |  |  |  | 418  | 529.2781 | 1056.542 | 2 | 1056.539 | 0.003  | 0 | 35.1   | 0.037    | R | GLSLPPAC'SR                | A |
|  |  |  |  |  |  | 420  | 529.2783 | 1056.542 | 2 | 1056.539 | 0.0035 | 0 | 38.63  | 0.016    | R | GLSLPPAC'SR                | A |
|  |  |  |  |  |  | 483  | 551.769  | 1101.523 | 2 | 1101.52  | 0.0031 | 0 | 49.48  | 0.0011   | K | ITHGOFDER                  | Y |
|  |  |  |  |  |  | 492  | 554.3209 | 1106.627 | 2 | 1106.624 | 0.0036 | 0 | 33.87  | 0.029    | K | VPPPLFOFGR                 | K |
|  |  |  |  |  |  | 493  | 554.3209 | 1106.627 | 2 | 1106.624 | 0.0036 | 0 | 52.32  | 0.00041  | K | VPPPLFOFGR                 | K |
|  |  |  |  |  |  | 762  | 636.2723 | 1270.53  | 2 | 1269.524 | 1.0064 | 0 | 45.5   | 0.00094  | R | GVFWM@BWR                  | N |
|  |  |  |  |  |  | 848  | 453.2326 | 1366.676 | 2 | 1366.671 | 0.0062 | 0 | 49.22  | 0.0012   | K | VN@BPTD@LDSK               | I |
|  |  |  |  |  |  | 866  | 682.8114 | 1363.608 | 2 | 1363.604 | 0.0045 | 0 | 45.31  | 0.0016   | K | LSEMTEQDOOR                | I |
|  |  |  |  |  |  | 880  | 690.8908 | 1379.605 | 2 | 1379.599 | 0.0064 | 0 | 43.4   | 0.0024   | K | LSEM@TEQDOOR               | L |
|  |  |  |  |  |  | 895  | 695.8563 | 1389.698 | 2 | 1389.693 | 0.0051 | 0 | 50.28  | 0.0013   | K | LFPPSDV@DLR                | K |

|  |  |  |  |  |  |     |          |          |   |          |        |   |        |          |   |                     |   |
|--|--|--|--|--|--|-----|----------|----------|---|----------|--------|---|--------|----------|---|---------------------|---|
|  |  |  |  |  |  | 615 | 692.3582 | 1382.702 | 2 | 1382.698 | 0.0042 | 0 | 59.75  | 9.90E-05 | K | DLAGC*HGLSNVK       | L |
|  |  |  |  |  |  | 624 | 705.3439 | 1408.673 | 2 | 1408.669 | 0.0043 | 0 | 63.95  | 3.90E-05 | K | VC*VOTVESGAMTK      | D |
|  |  |  |  |  |  | 639 | 713.3417 | 1424.669 | 2 | 1424.664 | 0.0048 | 0 | 104.36 | 3.30E-09 | K | VC*VOTVESGAM@TK     | I |
|  |  |  |  |  |  | 650 | 578.9406 | 1753.8   | 3 | 1753.796 | 0.0036 | 0 | 37.57  | 0.013    | K | VEKRV*VEMGGDENTR    | D |
|  |  |  |  |  |  | 629 | 589.6047 | 1765.792 | 3 | 1765.786 | 0.0059 | 0 | 31.83  | 0.037    | K | VEKRV*VEMGGDENTR    | I |
|  |  |  |  |  |  | 874 | 616.6393 | 1846.896 | 3 | 1846.891 | 0.0052 | 0 | 41.77  | 0.0044   | R | DOTNDQVTDLSALATQ    | Y |
|  |  |  |  |  |  | 875 | 924.4565 | 1846.898 | 2 | 1846.891 | 0.0076 | 0 | 91.93  | 4.80E-08 | R | DOTNDQVTDLSALATQ    | Y |
|  |  |  |  |  |  | 884 | 640.997  | 1919.969 | 3 | 1919.963 | 0.0063 | 0 | 41.86  | 0.0053   | K | LINEFLNITDFDLTK     | S |
|  |  |  |  |  |  | 985 | 890.9227 | 1919.971 | 3 | 1919.965 | 0.006  | 0 | 32.19  | 0.041    | K | LINEFLNITDFDLTK     | I |
|  |  |  |  |  |  | 196 | 453.2429 | 964.4712 | 2 | 964.4688 | 0.0024 | 0 | 41.24  | 0.014    | R | DFNVPVMBK           | N |
|  |  |  |  |  |  | 320 | 542.3077 | 1082.601 | 2 | 1082.597 | 0.0036 | 0 | 44.11  | 0.0035   | K | VLPQVVDALSNV        | - |
|  |  |  |  |  |  | 479 | 609.3338 | 1216.653 | 2 | 1216.649 | 0.0045 | 0 | 37.62  | 0.021    | K | IQLNNM@LDK          | V |
|  |  |  |  |  |  | 573 | 658.881  | 1317.722 | 2 | 1317.718 | 0.0036 | 0 | 43.85  | 0.0039   | K | ITLQVDFVADK         | F |
|  |  |  |  |  |  | 614 | 461.9078 | 1382.702 | 3 | 1382.698 | 0.0039 | 0 | 39.37  | 0.011    | R | AHSSM@VGVNLPQK      | A |
|  |  |  |  |  |  | 617 | 692.3586 | 1382.703 | 2 | 1382.698 | 0.005  | 0 | 53.48  | 0.0042   | R | AHSSM@VGVNLPQK      | A |
|  |  |  |  |  |  | 751 | 545.6041 | 1633.791 | 3 | 1633.785 | 0.0057 | 0 | 57.97  | 0.00017  | K | LDGVVYNDVAFGTARH    | A |
|  |  |  |  |  |  | 752 | 817.9034 | 1633.792 | 3 | 1633.785 | 0.0073 | 0 | 66.18  | 2.40E-05 | K | LDGVVYNDVAFGTARH    | A |
|  |  |  |  |  |  | 899 | 870.963  | 1739.912 | 3 | 1739.905 | 0.0061 | 0 | 42.04  | 0.004    | K | VSHVSTGGASLELEK     | V |
|  |  |  |  |  |  | 810 | 580.978  | 1739.912 | 3 | 1739.905 | 0.0069 | 0 | 36.66  | 0.014    | K | VSHVSTGGASLELEK     | V |
|  |  |  |  |  |  | 813 | 877.9003 | 1753.786 | 2 | 1753.78  | 0.0063 | 0 | 99.06  | 7.00E-09 | R | GC*TIIGGGDTATC*CAK  | W |
|  |  |  |  |  |  | 816 | 880.4446 | 1758.875 | 2 | 1758.869 | 0.0061 | 0 | 53.79  | 0.00039  | K | VNEM@IIGGM@AFFLTK   | I |
|  |  |  |  |  |  | 896 | 991.9769 | 1981.939 | 2 | 1981.93  | 0.0089 | 0 | 50.72  | 0.00055  | K | VLNMM@EIGTSLYDEEGAK | I |
|  |  |  |  |  |  | 898 | 665.9545 | 1987.932 | 3 | 1987.925 | 0.0065 | 0 | 37.18  | 0.011    | K | VLNMM@EIGTSLYDEEGAK | I |
|  |  |  |  |  |  | 899 | 999.9739 | 1997.933 | 2 | 1997.925 | 0.0082 | 0 | 90.35  | 5.50E-08 | K | VLNMM@EIGTSLYDEEGAK | I |
|  |  |  |  |  |  | 905 | 1012.027 | 2022.039 | 2 | 2022.031 | 0.0079 | 1 | 77.56  | 1.00E-06 | K | ITLQVDFVADKFDENAK   | T |
|  |  |  |  |  |  | 381 | 567.7949 | 1133.572 | 2 | 1133.572 | 0.0035 | 0 | 69.28  | 1.90E-05 | K | TAIQAAQVYDK         | T |
|  |  |  |  |  |  | 479 | 609.3338 | 1216.653 | 2 | 1216.649 | 0.0045 | 0 | 37.62  | 0.021    | K | IQLNNM@LDK          | V |
|  |  |  |  |  |  | 573 | 658.881  | 1317.722 | 2 | 1317.718 | 0.0036 | 0 | 43.85  | 0.0039   | K | ITLQVDFVADK         | F |
|  |  |  |  |  |  | 614 | 461.9078 | 1382.702 | 3 | 1382.698 | 0.0039 | 0 | 39.37  | 0.011    | R | AHSSM@VGVNLPQK      | A |
|  |  |  |  |  |  | 617 | 692.3586 | 1382.703 | 2 | 1382.698 | 0.005  | 0 | 53.48  | 0.0042   | R | AHSSM@VGVNLPQK      | A |
|  |  |  |  |  |  | 751 | 545.6041 | 1633.791 | 3 | 1633.785 | 0.0057 | 0 | 57.97  | 0.00017  | K | LDGVVYNDVAFGTARH    | A |
|  |  |  |  |  |  | 752 | 817.9034 | 1633.792 | 3 | 1633.785 | 0.0073 | 0 | 66.18  | 2.40E-05 | K | LDGVVYNDVAFGTARH    | A |
|  |  |  |  |  |  | 899 | 870.963  | 1739.912 | 3 | 1739.905 | 0.0061 | 0 | 42.04  | 0.004    | K | VSHVSTGGASLELEK     | V |
|  |  |  |  |  |  | 810 | 580.978  | 1739.912 | 3 | 1739.905 | 0.0069 | 0 | 36.66  | 0.014    | K | VSHVSTGGASLELEK     | V |
|  |  |  |  |  |  | 813 | 877.9003 | 1753.786 | 2 | 1753.78  | 0.0063 | 0 | 99.06  | 7.00E-09 | R | GC*TIIGGGDTATC*CAK  | W |
|  |  |  |  |  |  | 816 | 880.4446 | 1758.875 | 2 | 1758.869 | 0.0061 | 0 | 53.79  | 0.00039  | K | VNEM@IIGGM@AFFLTK   | I |
|  |  |  |  |  |  | 896 | 991.9769 | 1981.939 | 2 | 1981.93  | 0.0089 | 0 | 50.72  | 0.00055  | K | VLNMM@EIGTSLYDEEGAK | I |
|  |  |  |  |  |  | 898 | 665.9545 | 1987.932 | 3 | 1987.925 | 0.0065 | 0 | 37.18  | 0.011    | K | VLNMM@EIGTSLYDEEGAK | I |
|  |  |  |  |  |  | 899 | 999.9739 | 1997.933 | 2 | 1997.925 | 0.0082 | 0 | 90.35  | 5.50E-08 | K | VLNMM@EIGTSLYDEEGAK | I |
|  |  |  |  |  |  | 905 | 1012.027 | 2022.039 | 2 | 2022.031 | 0.0079 | 1 | 77.56  | 1.00E-06 | K | ITLQVDFVADKFDENAK   | T |
|  |  |  |  |  |  | 381 | 567.7949 | 1133.572 | 2 | 1133.572 | 0.0035 | 0 | 69.28  | 1.90E-05 | K | TAIQAAQVYDK         | T |
|  |  |  |  |  |  | 479 | 609.3338 | 1216.653 | 2 | 1216.649 | 0.0045 | 0 | 37.62  | 0.021    | K | IQLNNM@LDK          | V |
|  |  |  |  |  |  | 573 | 658.881  | 1317.722 | 2 | 1317.718 | 0.0036 | 0 | 43.85  | 0.0039   | K | ITLQVDFVADK         | F |
|  |  |  |  |  |  | 614 | 461.9078 | 1382.702 | 3 | 1382.698 | 0.0039 | 0 | 39.37  | 0.011    | R | AHSSM@VGVNLPQK      | A |
|  |  |  |  |  |  | 617 | 692.3586 | 1382.703 | 2 | 1382.698 | 0.005  | 0 | 53.48  | 0.0042   | R | AHSSM@VGVNLPQK      | A |
|  |  |  |  |  |  | 751 | 545.6041 | 1633.791 | 3 | 1633.785 | 0.0057 | 0 | 57.97  | 0.00017  | K | LDGVVYNDVAFGTARH    | A |
|  |  |  |  |  |  | 752 | 817.9034 | 1633.792 | 3 | 1633.785 | 0.0073 | 0 | 66.18  | 2.40E-05 | K | LDGVVYNDVAFGTARH    | A |
|  |  |  |  |  |  | 899 | 870.963  | 1739.912 | 3 | 1739.905 | 0.0061 | 0 | 42.04  | 0.004    | K | VSHVSTGGASLELEK     | V |
|  |  |  |  |  |  | 810 | 580.978  | 1739.912 | 3 | 1739.905 | 0.0069 | 0 | 36.66  | 0.014    | K | VSHVSTGGASLELEK     | V |
|  |  |  |  |  |  | 813 | 877.9003 | 1753.786 | 2 | 1753.78  | 0.0063 | 0 | 99.06  | 7.00E-09 | R | GC*TIIGGGDTATC*CAK  | W |
|  |  |  |  |  |  | 816 | 880.4446 | 1758.875 | 2 | 1758.869 | 0.0061 | 0 | 53.79  | 0.00039  | K | VNEM@IIGGM@AFFLTK   | I |
|  |  |  |  |  |  | 896 | 991.9769 | 1981.939 | 2 | 1981.93  | 0.0089 | 0 | 50.72  | 0.00055  | K | VLNMM@EIGTSLYDEEGAK | I |
|  |  |  |  |  |  | 898 | 665.9545 | 1987.932 | 3 | 1987.925 | 0.0065 | 0 | 37.18  | 0.011    | K | VLNMM@EIGTSLYDEEGAK | I |
|  |  |  |  |  |  | 899 | 999.9739 | 1997.933 | 2 | 1997.925 | 0.0082 | 0 | 90.35  | 5.50E-08 | K | VLNMM@EIGTSLYDEEGAK | I |
|  |  |  |  |  |  | 905 | 1012.027 | 2022.039 | 2 | 2022.031 | 0.0079 | 1 | 77.56  | 1.00E-06 | K | ITLQVDFVADKFDENAK   | T |
|  |  |  |  |  |  | 381 | 567.7949 | 1133.572 | 2 | 1133.572 | 0.0035 | 0 | 69.28  | 1.90E-05 | K | TAIQAAQVYDK         | T |
|  |  |  |  |  |  | 479 | 609.3338 | 1216.653 | 2 | 1216.649 | 0.0045 | 0 | 37.62  | 0.021    | K | IQLNNM@LDK          | V |
|  |  |  |  |  |  | 573 | 658.881  | 1317.722 | 2 | 1317.718 | 0.0036 | 0 | 43.85  | 0.0039   | K | ITLQVDFVADK         | F |
|  |  |  |  |  |  | 614 | 461.9078 | 1382.702 | 3 | 1382.698 | 0.0039 | 0 | 39.37  | 0.011    | R | AHSSM@VGVNLPQK      | A |
|  |  |  |  |  |  | 617 | 692.3586 | 1382.703 | 2 | 1382.698 | 0.005  | 0 | 53.48  | 0.0042   | R | AHSSM@VGVNLPQK      | A |
|  |  |  |  |  |  | 751 | 545.6041 | 1633.791 | 3 | 1633.785 | 0.0057 | 0 | 57.97  | 0.00017  | K | LDGVVYNDVAFGTARH    | A |
|  |  |  |  |  |  | 752 | 817.9034 | 1633.792 | 3 | 1633.785 | 0.0073 | 0 | 66.18  | 2.40E-05 | K | LDGVVYNDVAFGTARH    | A |
|  |  |  |  |  |  | 899 | 870.963  | 1739.912 | 3 | 1739.905 | 0.0061 | 0 | 42.04  | 0.004    | K | VSHVSTGGASLELEK     | V |
|  |  |  |  |  |  | 810 | 580.978  | 1739.912 | 3 | 1739.905 | 0.0069 | 0 | 36.66  | 0.014    | K | VSHVSTGGASLELEK     | V |
|  |  |  |  |  |  | 813 | 877.9003 | 1753.786 | 2 | 1753.78  | 0.0063 | 0 | 99.06  | 7.00E-09 | R | GC*TIIGGGDTATC*CAK  | W |
|  |  |  |  |  |  | 816 | 880.4446 | 1758.875 | 2 | 1758.869 | 0.0061 | 0 | 53.79  | 0.00039  | K | VNEM@IIGGM@AFFLTK   | I |
|  |  |  |  |  |  | 896 | 991.9769 | 1981.939 | 2 | 1981.93  | 0.0089 | 0 | 50.72  | 0.00055  | K | VLNMM@EIGTSLYDEEGAK | I |
|  |  |  |  |  |  | 898 | 665.9545 | 1987.932 | 3 | 1987.925 | 0.0065 | 0 | 37.18  | 0.011    | K | VLNMM@EIGTSLYDEEGAK | I |
|  |  |  |  |  |  | 899 | 999.9739 | 1997.933 | 2 | 1997.925 | 0.0082 | 0 | 90.35  | 5.50E-08 | K | VLNMM@EIGTSLYDEEGAK | I |
|  |  |  |  |  |  | 905 | 1012.027 | 2022.039 | 2 | 2022.031 | 0.0079 | 1 | 77.56  | 1.00E-06 | K | ITLQVDFVADKFDENAK   | T |
|  |  |  |  |  |  | 381 | 567.7949 | 1133.572 | 2 | 1133.572 | 0.0035 | 0 | 69.28  | 1.90E-05 | K | TAIQAAQVYDK         | T |
|  |  |  |  |  |  | 479 | 609.3338 | 1216.653 | 2 | 1216.649 | 0.0045 | 0 | 37.62  | 0.021    | K | IQLNNM@LDK          | V |
|  |  |  |  |  |  | 573 | 658.881  | 1317.722 | 2 | 1317.718 | 0.0036 | 0 | 43.85  | 0.0039   | K | ITLQVDFVADK         | F |
|  |  |  |  |  |  | 614 | 461.9078 | 1382.702 | 3 | 1382.698 | 0.0039 | 0 | 39.37  | 0.011    | R | AHSSM@VGVNLPQK      | A |
|  |  |  |  |  |  | 617 | 692.3586 | 1382.703 | 2 | 1382.698 | 0.005  | 0 | 53.48  | 0.0042   | R | AHSSM@VGVNLPQK      | A |
|  |  |  |  |  |  |     |          |          |   |          |        |   |        |          |   |                     |   |

|        |                                        |                           |     |    |       |       |      |  |  |      |          |          |   |          |         |   |        |          |   |                                         |     |
|--------|----------------------------------------|---------------------------|-----|----|-------|-------|------|--|--|------|----------|----------|---|----------|---------|---|--------|----------|---|-----------------------------------------|-----|
|        |                                        |                           |     |    |       |       |      |  |  | 426  | 522.7877 | 1043.561 | 2 | 1043.561 | -0.0002 | 0 | 81.4   | 1.20E-06 | R | QLLTTADDR                               | V   |
|        |                                        |                           |     |    |       |       |      |  |  | 472  | 534.7927 | 1067.571 | 2 | 1067.572 | -0.0014 | 1 | 75.12  | 3.60E-06 | K | KELSDIAHR                               | I   |
|        |                                        |                           |     |    |       |       |      |  |  | 515  | 554.2919 | 1106.569 | 2 | 1106.572 | -0.0027 | 1 | 40.38  | 0.014    | K | AAQEYKRR                                | A   |
|        |                                        |                           |     |    |       |       |      |  |  | 518  | 554.2924 | 1106.57  | 2 | 1106.572 | -0.0017 | 1 | 71.54  | 1.20E-05 | K | AAQEYKRR                                | A   |
|        |                                        |                           |     |    |       |       |      |  |  | 555  | 566.7914 | 1131.568 | 2 | 1131.571 | -0.0003 | 0 | 63.51  | 7.00E-05 | R | ALANSLACQKG                             | Y   |
|        |                                        |                           |     |    |       |       |      |  |  | 556  | 566.7917 | 1131.569 | 2 | 1131.571 | -0.0017 | 0 | 49.73  | 0.0019   | R | ALANSLACQKG                             | Y   |
|        |                                        |                           |     |    |       |       |      |  |  | 779  | 666.8531 | 1331.692 | 2 | 1331.693 | -0.0016 | 0 | 47.95  | 0.002    | K | GILAADESTGSIK                           | R   |
|        |                                        |                           |     |    |       |       |      |  |  | 780  | 666.8532 | 1331.692 | 2 | 1331.693 | -0.0014 | 0 | 56.03  | 0.00031  | K | GILAADESTGSIK                           | R   |
|        |                                        |                           |     |    |       |       |      |  |  | 791  | 666.8535 | 1331.692 | 2 | 1331.693 | -0.0009 | 0 | 79.67  | 1.40E-06 | R | GILAADESTGSIK                           | R   |
|        |                                        |                           |     |    |       |       |      |  |  | 782  | 666.8541 | 1331.694 | 2 | 1331.693 | 0.0005  | 0 | 49.85  | 0.0013   | K | GILAADESTGSIK                           | R   |
|        |                                        |                           |     |    |       |       |      |  |  | 791  | 671.8588 | 1341.703 | 2 | 1341.704 | -0.0011 | 0 | 40.17  | 0.0095   | K | ADDDGPPFOVIK                            | S   |
|        |                                        |                           |     |    |       |       |      |  |  | 793  | 448.2418 | 1341.704 | 3 | 1341.704 | -0.0006 | 0 | 36.37  | 0.023    | K | ADDDGPPFOVIK                            | S   |
|        |                                        |                           |     |    |       |       |      |  |  | 795  | 448.242  | 1341.704 | 3 | 1341.704 | 0.0002  | 0 | 35.36  | 0.029    | K | ADDDGPPFOVIK                            | S   |
|        |                                        |                           |     |    |       |       |      |  |  | 819  | 693.9098 | 1376.708 | 2 | 1376.709 | -0.0014 | 0 | 41.35  | 0.0006   | M | PHYPALTPPEOK                            | S   |
|        |                                        |                           |     |    |       |       |      |  |  | 820  | 689.361  | 1376.708 | 2 | 1376.709 | -0.0013 | 0 | 50.19  | 0.0013   | M | PHYPALTPPEOK                            | K   |
|        |                                        |                           |     |    |       |       |      |  |  | 821  | 459.9099 | 1376.708 | 3 | 1376.709 | -0.001  | 0 | 45.78  | 0.0033   | M | PHYPALTPPEOK                            | K   |
|        |                                        |                           |     |    |       |       |      |  |  | 888  | 745.8664 | 1489.698 | 2 | 1489.701 | -0.0025 | 0 | 69.85  | 7.90E-06 | R | LOSGIGTENTEENR                          | R   |
|        |                                        |                           |     |    |       |       |      |  |  | 889  | 745.8666 | 1489.699 | 2 | 1489.701 | -0.0023 | 0 | 80.72  | 6.50E-07 | R | LOSGIGTENTEENR                          | R   |
|        |                                        |                           |     |    |       |       |      |  |  | 957  | 549.6867 | 1645.798 | 3 | 1645.802 | -0.0037 | 1 | 40.06  | 0.0093   | R | LOSGIGTENTEENR                          | F   |
|        |                                        |                           |     |    |       |       |      |  |  | 962  | 823.9077 | 1645.801 | 2 | 1645.802 | -0.0012 | 1 | 38.1   | 0.014    | K | LOSGIGTENTEENR                          | R   |
|        |                                        |                           |     |    |       |       |      |  |  | 964  | 551.6149 | 1651.823 | 3 | 1651.824 | -0.0012 | 0 | 68.04  | 1.50E-05 | K | FSNEEIAMATVTLR                          | R   |
|        |                                        |                           |     |    |       |       |      |  |  | 965  | 826.9187 | 1651.823 | 3 | 1651.824 | -0.0011 | 0 | 65.04  | 3.00E-05 | K | FSNEEIAMATVTLR                          | R   |
|        |                                        |                           |     |    |       |       |      |  |  | 966  | 551.6151 | 1651.823 | 3 | 1651.824 | -0.0006 | 0 | 35.66  | 0.026    | K | FSNEEIAMATVTLR                          | R   |
|        |                                        |                           |     |    |       |       |      |  |  | 967  | 826.9194 | 1651.824 | 3 | 1651.824 | 0.0004  | 0 | 68.67  | 1.10E-05 | K | FSNEEIAMATVTLR                          | R   |
|        |                                        |                           |     |    |       |       |      |  |  | 973  | 556.9466 | 1667.818 | 3 | 1667.819 | -0.0009 | 0 | 61.82  | 5.30E-05 | K | FSNEEIAM@ATVTLR                         | R   |
|        |                                        |                           |     |    |       |       |      |  |  | 974  | 834.9164 | 1667.818 | 3 | 1667.819 | -0.0005 | 0 | 106.99 | 1.70E-09 | K | FSNEEIAM@ATVTLR                         | R   |
|        |                                        |                           |     |    |       |       |      |  |  | 975  | 556.9468 | 1667.818 | 3 | 1667.819 | -0.0003 | 0 | 70.16  | 7.80E-06 | K | FSNEEIAM@ATVTLR                         | R   |
|        |                                        |                           |     |    |       |       |      |  |  | 976  | 834.9169 | 1667.818 | 3 | 1667.819 | 0.0003  | 0 | 104.74 | 2.60E-09 | K | FSNEEIAM@ATVTLR                         | R   |
|        |                                        |                           |     |    |       |       |      |  |  | 1037 | 603.6546 | 1807.942 | 3 | 1807.944 | -0.0024 | 0 | 34.72  | 0.023    | K | C*PLLPK@WALFYSGR                        | A   |
|        |                                        |                           |     |    |       |       |      |  |  | 1038 | 603.6548 | 1807.943 | 3 | 1807.944 | -0.0018 | 0 | 41.12  | 0.0054   | K | C*PLLPK@WALFYSGR                        | A   |
|        |                                        |                           |     |    |       |       |      |  |  | 1040 | 603.6552 | 1807.943 | 3 | 1807.944 | -0.0005 | 0 | 44.95  | 0.0019   | K | C*PLLPK@WALFYSGR                        | A   |
|        |                                        |                           |     |    |       |       |      |  |  | 1149 | 1044.55  | 2087.085 | 2 | 2087.087 | -0.0021 | 0 | 71.26  | 4.60E-06 | K | VNPK*GCVLHFLTYOK                        | A   |
|        |                                        |                           |     |    |       |       |      |  |  | 1160 | 1054.051 | 2106.088 | 2 | 2106.089 | -0.0009 | 0 | 70.86  | 4.70E-06 | K | IGEHTPS@SALAIM@ANANLVR                  | A   |
|        |                                        |                           |     |    |       |       |      |  |  | 1164 | 1062.049 | 2122.084 | 2 | 2122.084 | -0.0002 | 0 | 57.6   | 0.00011  | K | IGEHTPS@SALAIM@ANANLVR                  | A   |
|        |                                        |                           |     |    |       |       |      |  |  | 1165 | 708.3687 | 2122.084 | 3 | 2122.084 | 0.0001  | 0 | 72.1   | 3.90E-06 | K | IGEHTPS@SALAIM@ANANLVR                  | A   |
|        |                                        |                           |     |    |       |       |      |  |  | 1166 | 708.3687 | 2122.084 | 3 | 2122.084 | 0.0001  | 0 | 60.26  | 6.00E-05 | K | IGEHTPS@SALAIM@ANANLVR                  | A   |
|        |                                        |                           |     |    |       |       |      |  |  | 1167 | 708.369  | 2122.085 | 3 | 2122.084 | 0.0001  | 0 | 35.32  | 0.018    | K | IGEHTPS@SALAIM@ANANLVR                  | A   |
|        |                                        |                           |     |    |       |       |      |  |  | 1211 | 1129.521 | 2257.027 | 2 | 2257.029 | -0.002  | 0 | 146.37 | 9.20E-14 | K | YTPSGSGSAAE@S@L@F@H@M@Y                 | -   |
|        |                                        |                           |     |    |       |       |      |  |  | 1212 | 1136.574 | 2271.133 | 2 | 2271.134 | -0.0011 | 0 | 99.57  | 7.10E-09 | K | GVVPL@NGT@T@Q@L@D@L@S@R                 | C   |
|        |                                        |                           |     |    |       |       |      |  |  | 1218 | 1136.574 | 2271.134 | 2 | 2271.134 | -0.0002 | 0 | 99.57  | 7.00E-09 | K | GVVPL@NGT@T@Q@L@D@L@S@R                 | C   |
|        |                                        |                           |     |    |       |       |      |  |  | 1220 | 758.0522 | 2271.135 | 2 | 2271.134 | -0.0006 | 0 | 41.73  | 0.0001   | K | GVVPL@NGT@T@Q@L@D@L@S@R                 | C   |
|        |                                        |                           |     |    |       |       |      |  |  | 1307 | 1007.506 | 3019.496 | 3 | 3019.496 | -0.0003 | 0 | 64.82  | 1.10E-05 | R | YASIC*Q@N@G@V@P@E@L@P@D@D@H@L@K         | R   |
|        |                                        |                           |     |    |       |       |      |  |  | 1310 | 1015.19  | 3042.549 | 3 | 3042.551 | -0.0022 | 0 | 59.41  | 3.20E-05 | R | TVPPAV@G@V@L@S@G@S@E@E@S@L@N@I@N@K      | C   |
|        |                                        |                           |     |    |       |       |      |  |  | 1312 | 1015.19  | 3042.55  | 3 | 3042.551 | -0.0015 | 0 | 67.61  | 4.80E-06 | R | TVPPAV@G@V@L@S@G@S@E@E@S@L@N@I@N@K      | C   |
|        |                                        |                           |     |    |       |       |      |  |  | 1328 | 784.1442 | 3132.548 | 4 | 3132.549 | -0.0009 | 0 | 58.5   | 4.60E-05 | K | ALSDHH@V@L@E@L@L@K@P@M@V@T@P@H@C@T@Q@K  | C   |
|        |                                        |                           |     |    |       |       |      |  |  | 1333 | 1059.54  | 3175.597 | 3 | 3175.597 | -0.0002 | 0 | 81.21  | 2.10E-07 | R | YASIC*Q@N@G@V@P@E@L@P@D@D@H@L@K         | R   |
| P70404 | Isocitrate dehydrogenase (NAD) subunit | 720                       | 8   | 8  | 42758 | 9.17  |      |  |  | 75   | 402.7232 | 803.4318 | 2 | 803.4323 | -0.0005 | 0 | 40.05  | 0.038    | R | NAIM@AIR                                | R   |
|        |                                        |                           |     |    |       |       |      |  |  | 301  | 478.7921 | 955.5697 | 2 | 955.5702 | -0.0005 | 0 | 40.22  | 0.0049   | K | DIDLIVR                                 | E   |
|        |                                        |                           |     |    |       |       |      |  |  | 785  | 669.8187 | 1337.623 | 2 | 1337.622 | 0.0007  | 0 | 66.2   | 2.50E-05 | K | LDG@L@L@C@Q@R                           | E   |
|        |                                        |                           |     |    |       |       |      |  |  | 802  | 767.9902 | 1532.762 | 2 | 1532.766 | -0.0001 | 0 | 42.98  | 0.0054   | K | TS@L@N@H@H@C@                           | E   |
|        |                                        |                           |     |    |       |       |      |  |  | 1171 | 726.3746 | 2176.102 | 2 | 2176.102 | -0.0002 | 0 | 36.47  | 0.013    | R | HTV@M@I@P@D@G@P@E@L@M@L@H@V@K           | K   |
|        |                                        |                           |     |    |       |       |      |  |  | 1287 | 831.7264 | 2492.158 | 3 | 2492.155 | 0.0021  | 0 | 36.74  | 0.0083   | R | ENTE@G@Y@S@L@E@H@S@V@G@V@E@S@L@K        | I   |
|        |                                        |                           |     |    |       |       |      |  |  | 1296 | 664.3004 | 2653.172 | 4 | 2653.172 | 0.0009  | 0 | 36.63  | 0.0053   | R | HAC*V@P@D@E@V@H@S@N@A@E@E@D@R           | N   |
|        |                                        |                           |     |    |       |       |      |  |  | 1339 | 1105.858 | 3314.552 | 3 | 3314.551 | 0.0012  | 0 | 82.19  | 1.70E-08 | K | AVL@S@M@D@N@E@M@H@P@D@G@G@T@S@Q@I@D@I@R | H   |
| 39     | P5776                                  | Elongation factor 1-delta | 663 | 17 | 13    | 31274 | 4.91 |  |  | 270  | 478.3181 | 954.6216 | 2 | 954.6226 | -0.001  | 1 | 25.81  | 0.041    | K | AKK@P@L@V@K                             | S   |
|        |                                        |                           |     |    |       |       |      |  |  | 448  | 536.7739 | 1071.533 | 2 | 1071.535 | -0.0017 | 0 | 58.06  | 0.00019  | M | #ATN@L@A@E@K                            | I   |
|        |                                        |                           |     |    |       |       |      |  |  | 449  | 536.774  | 1071.534 | 2 | 1071.535 | -0.0013 | 0 | 50.79  | 0.0009   | M | #ATN@L@A@E@K                            | I   |
|        |                                        |                           |     |    |       |       |      |  |  | 459  | 643.798  | 1085.591 | 2 | 1085.593 | -0.0015 | 0 | 83.56  | 8.80E-07 | R | Q@E@N@V@L@V@R                           | L   |
|        |                                        |                           |     |    |       |       |      |  |  | 681  | 643.358  | 1284.701 | 2 | 1284.704 | -0.0024 | 0 | 49.98  | 0.00093  | R | GV@Q@D@L@Q@A@I@K                        | L   |
|        |                                        |                           |     |    |       |       |      |  |  | 682  | 643.3588 | 1284.703 | 2 | 1284.704 | -0.0008 | 0 | 79.3   | 1.10E-06 | R | GV@Q@D@L@Q@A@I@K                        | L   |
|        |                                        |                           |     |    |       |       |      |  |  | 726  | 673.8336 | 1345.653 | 2 | 1345.655 | -0.0022 | 0 | 73.16  | 5.20E-06 | K | LQ@I@C@V@V@E@D@K                        | V   |
|        |                                        |                           |     |    |       |       |      |  |  | 753  | 708.3774 | 1414.74  | 2 | 1414.742 | -0.0012 | 0 | 92.28  | 6.20E-08 | R | IT@S@L@E@V@N@Q@L@R                      | G   |
|        |                                        |                           |     |    |       |       |      |  |  | 754  | 472.5874 | 1414.741 | 3 | 1414.742 | -0.0011 | 0 | 59.25  | 0.00012  | K | IT@S@L@E@V@N@Q@L@R                      | V   |
|        |                                        |                           |     |    |       |       |      |  |  | 758  | 712.3582 | 1422.702 | 2 | 1422.704 | -0.0019 | 0 | 51.02  | 0.00092  | R | AT@P@Q@T@H@V@S@P@M@R                    | O   |
|        |                                        |                           |     |    |       |       |      |  |  | 767  | 480.573  | 1438.697 | 3 | 1438.699 | -0.0014 | 0 | 39.81  | 0.012    | R | AT@P@Q@T@H@V@S@P@M@R                    | O</ |





|    |        |                                     |      |    |    |       |      |      |          |          |   |          |         |   |        |          |   |                                    |   |
|----|--------|-------------------------------------|------|----|----|-------|------|------|----------|----------|---|----------|---------|---|--------|----------|---|------------------------------------|---|
|    |        |                                     |      |    |    |       |      | 1393 | 669.3651 | 2005.074 | 3 | 2005.077 | -0.0039 | 0 | 49.29  | 0.00039  | K | ITVVGVGAVGM@AC'ASILMK              | D |
|    |        |                                     |      |    |    |       |      | 1394 | 669.3652 | 2005.074 | 3 | 2005.077 | -0.0035 | 0 | 33.33  | 0.015    | K | ITVVGVGAVGM@AC'ASILMK              | D |
|    |        |                                     |      |    |    |       |      | 1395 | 1003.544 | 2005.074 | 2 | 2005.077 | -0.0032 | 0 | 114.24 | 1.20E-06 | K | ITVVGVGAVGM@AC'ASILMK              | D |
|    |        |                                     |      |    |    |       |      | 1396 | 669.3654 | 2005.074 | 3 | 2005.077 | -0.003  | 0 | 70.18  | 3.30E-06 | K | ITVVGVGAVGM@AC'ASILMK              | D |
|    |        |                                     |      |    |    |       |      | 1397 | 669.3655 | 2005.075 | 3 | 2005.077 | -0.0028 | 0 | 74.49  | 1.20E-06 | K | ITVVGVGAVGM@AC'ASILMK              | D |
|    |        |                                     |      |    |    |       |      | 1398 | 669.3655 | 2005.075 | 3 | 2005.077 | -0.0028 | 0 | 68.25  | 5.10E-06 | K | ITVVGVGAVGM@AC'ASILMK              | D |
|    |        |                                     |      |    |    |       |      | 1399 | 1003.545 | 2005.075 | 2 | 2005.077 | -0.0027 | 0 | 72.16  | 2.10E-06 | K | ITVVGVGAVGM@AC'ASILMK              | D |
|    |        |                                     |      |    |    |       |      | 1400 | 669.3657 | 2005.075 | 3 | 2005.077 | -0.0023 | 0 | 34.45  | 0.012    | K | ITVVGVGAVGM@AC'ASILMK              | D |
|    |        |                                     |      |    |    |       |      | 1401 | 669.3657 | 2005.075 | 3 | 2005.077 | -0.0021 | 0 | 75.22  | 1.00E-06 | K | ITVVGVGAVGM@AC'ASILMK              | D |
|    |        |                                     |      |    |    |       |      | 1402 | 1003.545 | 2005.075 | 2 | 2005.077 | -0.002  | 0 | 102.22 | 2.10E-09 | K | ITVVGVGAVGM@AC'ASILMK              | D |
|    |        |                                     |      |    |    |       |      | 1403 | 669.366  | 2005.076 | 3 | 2005.077 | -0.0013 | 0 | 88.54  | 5.30E-08 | K | ITVVGVGAVGM@AC'ASILMK              | D |
|    |        |                                     |      |    |    |       |      | 1404 | 1003.545 | 2005.076 | 2 | 2005.077 | -0.0012 | 0 | 84.6   | 1.30E-07 | K | ITVVGVGAVGM@AC'ASILMK              | D |
|    |        |                                     |      |    |    |       |      | 1424 | 1011.543 | 2021.072 | 2 | 2021.072 | -0.0007 | 0 | 47.51  | 0.00072  | K | ITVVGVGAVGM@AC'ASILMK              | D |
|    |        |                                     |      |    |    |       |      | 1427 | 1011.546 | 2021.072 | 2 | 2021.072 | -0.0009 | 0 | 82.47  | 2.20E-07 | K | ITVVGVGAVGM@AC'ASILMK              | D |
|    |        |                                     |      |    |    |       |      | 1429 | 1011.546 | 2021.072 | 2 | 2021.072 | 0.0051  | 0 | 38.3   | 0.0047   | K | ITVVGVGAVGM@AC'ASILMK              | D |
|    |        |                                     |      |    |    |       |      | 1431 | 1011.547 | 2021.08  | 2 | 2021.072 | 0.008   | 0 | 82.45  | 2.10E-07 | K | ITVVGVGAVGM@AC'ASILMK              | D |
|    |        |                                     |      |    |    |       |      | 1432 | 674.7012 | 2021.082 | 3 | 2021.072 | 0.0095  | 0 | 77.27  | 7.10E-07 | K | ITVVGVGAVGM@AC'ASILMK              | D |
|    |        |                                     |      |    |    |       |      | 1502 | 1056.537 | 2111.059 | 2 | 2111.061 | -0.0017 | 0 | 96.31  | 1.80E-08 | K | GITSVWGLSVADLAESIMK                | D |
|    |        |                                     |      |    |    |       |      | 1620 | 785.0861 | 2352.236 | 3 | 2352.24  | -0.0035 | 1 | 47.79  | 0.00061  | K | LKGYTSWAGLSVADLAESIMK              | N |
|    |        |                                     |      |    |    |       |      | 1627 | 790.4178 | 2368.232 | 3 | 2368.235 | -0.0031 | 1 | 49.72  | 0.00041  | K | LKGYTSWAGLSVADLAESIMK              | N |
|    |        |                                     |      |    |    |       |      | 1658 | 858.4958 | 2572.466 | 3 | 2572.467 | -0.0013 | 1 | 37.76  | 0.001    | K | LLVSNPVDILTYVAVKISGFFK             | N |
|    |        |                                     |      |    |    |       |      | 1677 | 1453.749 | 2905.484 | 2 | 2905.49  | -0.0026 | 0 | 41.93  | 0.0018   | K | GLYGINEDVFLSVPCLLGGNSIDVVK         | V |
|    |        |                                     |      |    |    |       |      | 1678 | 969.5029 | 2905.487 | 3 | 2905.49  | -0.0026 | 0 | 51.93  | 0.0002   | K | GLYGINEDVFLSVPCLLGGNSIDVVK         | V |
|    |        |                                     |      |    |    |       |      | 1679 | 969.5034 | 2905.488 | 3 | 2905.49  | -0.0011 | 0 | 55.08  | 8.10E-05 | K | GLYGINEDVFLSVPCLLGGNSIDVVK         | V |
|    |        |                                     |      |    |    |       |      | 1733 | 903.4633 | 3609.824 | 4 | 3609.815 | 0.009   | 0 | 25.06  | 0.043    | R | LGVHALSC'HWVLEGHGDSVFPVWVGNVAVGSLK | S |
| 46 | P08249 | Malate dehydrogenase, mitochondrial | 895  | 23 | 16 | 35589 | 8.93 | 333  | 496.7732 | 991.5319 | 2 | 991.5338 | -0.0019 | 0 | 41.35  | 0.0089   | R | ANTFVAELK                          | G |
|    |        |                                     |      |    |    |       |      | 461  | 537.295  | 1072.576 | 2 | 1072.576 | -0.0009 | 0 | 61.99  | 0.00012  | R | IEAGTEVVK                          | A |
|    |        |                                     |      |    |    |       |      | 518  | 557.8119 | 1113.609 | 2 | 1113.61  | -0.0011 | 0 | 63.38  | 6.20E-05 | K | MIAEAIPELK                         | A |
|    |        |                                     |      |    |    |       |      | 539  | 565.8091 | 1129.604 | 2 | 1129.605 | -0.0015 | 0 | 35.9   | 0.038    | K | M@IAEAIPELK                        | A |
|    |        |                                     |      |    |    |       |      | 540  | 565.8093 | 1129.604 | 2 | 1129.605 | -0.0013 | 0 | 49.38  | 0.0017   | K | M@IAEAIPELK                        | A |
|    |        |                                     |      |    |    |       |      | 559  | 574.3217 | 1146.652 | 2 | 1146.651 | -0.0021 | 0 | 67.92  | 3.90E-05 | R | VNVPVIGGHAGK                       | T |
|    |        |                                     |      |    |    |       |      | 560  | 383.2244 | 1146.652 | 3 | 1146.651 | 0.0005  | 0 | 46.04  | 0.0018   | R | VNVPVIGGHAGK                       | T |
|    |        |                                     |      |    |    |       |      | 692  | 617.3633 | 1232.712 | 2 | 1232.713 | -0.0009 | 0 | 52.08  | 0.00028  | K | IFGVTTLDIVR                        | A |
|    |        |                                     |      |    |    |       |      | 767  | 664.3389 | 1326.663 | 2 | 1326.664 | -0.001  | 0 | 68.78  | 1.40E-05 | R | FVFSVLDMANGK                       | E |
|    |        |                                     |      |    |    |       |      | 773  | 698.8632 | 1337.712 | 2 | 1337.713 | -0.0008 | 0 | 75.14  | 3.20E-06 | K | GC'DVVVIVPAGVPR                    | K |
|    |        |                                     |      |    |    |       |      | 777  | 672.3387 | 1342.659 | 2 | 1342.659 | -0.0009 | 0 | 77.72  | 6.00E-06 | K | FVFSVLDMANGK                       | E |
|    |        |                                     |      |    |    |       |      | 789  | 684.826  | 1367.637 | 2 | 1367.639 | -0.0017 | 0 | 56.85  | 0.0002   | K | EGVVE'CFVQSK                       | E |
|    |        |                                     |      |    |    |       |      | 795  | 685.8884 | 1369.762 | 2 | 1369.764 | -0.0017 | 0 | 38.9   | 0.0086   | K | TIPLISOC'TPK                       | V |
|    |        |                                     |      |    |    |       |      | 844  | 727.858  | 1453.697 | 2 | 1453.698 | -0.001  | 0 | 112.69 | 5.70E-10 | K | AGAGSATSMLAYAGAR                   | F |
|    |        |                                     |      |    |    |       |      | 851  | 735.8534 | 1469.692 | 2 | 1469.693 | -0.001  | 0 | 91.11  | 7.50E-08 | K | AGAGSATSMLAYAGAR                   | F |
|    |        |                                     |      |    |    |       |      | 886  | 780.9034 | 1559.792 | 2 | 1559.794 | -0.0021 | 0 | 84.87  | 3.20E-07 | K | VDFPDQDLATLGR                      | I |
|    |        |                                     |      |    |    |       |      | 887  | 780.9036 | 1559.793 | 2 | 1559.794 | -0.0018 | 0 | 92     | 6.50E-08 | K | VDFPDQDLATLGR                      | I |
|    |        |                                     |      |    |    |       |      | 1009 | 897.0485 | 1792.082 | 2 | 1792.082 | 0.0002  | 0 | 89.16  | 4.90E-09 | R | VAVLGASGGIGQPLSLLK                 | N |
|    |        |                                     |      |    |    |       |      | 1010 | 598.3684 | 1792.083 | 2 | 1792.082 | 0.0012  | 0 | 30.61  | 0.0034   | K | VAVLGASGGIGQPLSLLK                 | N |
|    |        |                                     |      |    |    |       |      | 1011 | 598.3685 | 1792.084 | 2 | 1792.082 | 0.0014  | 0 | 49.97  | 3.90E-05 | R | VAVLGASGGIGQPLSLLK                 | N |
|    |        |                                     |      |    |    |       |      | 1012 | 897.0509 | 1792.082 | 2 | 1792.082 | 0.005   | 0 | 51.61  | 2.60E-05 | R | VAVLGASGGIGQPLSLLK                 | N |
|    |        |                                     |      |    |    |       |      | 1257 | 599.0665 | 2392.237 | 4 | 2392.239 | -0.0017 | 0 | 38.13  | 0.0058   | R | LTYLDIAHTPGVAADLSHETR              | A |
|    |        |                                     |      |    |    |       |      | 1258 | 798.4202 | 2392.239 | 3 | 2392.239 | 0.0002  | 0 | 72.14  | 2.30E-06 | R | LTYLDIAHTPGVAADLSHETR              | A |
|    |        |                                     |      |    |    |       |      | 1259 | 798.4202 | 2392.239 | 3 | 2392.239 | 0.0002  | 0 | 46.15  | 0.0005   | K | LTVITAR                            | E |
|    |        |                                     |      |    |    |       |      | 143  | 628.3257 | 1054.637 | 2 | 1054.639 | -0.0018 | 0 | 49.24  | 0.00037  | K | DOLVNLVK                           | E |
|    |        |                                     |      |    |    |       |      | 707  | 624.8024 | 1247.59  | 2 | 1247.593 | -0.0025 | 0 | 46.86  | 0.0021   | R | VIGSGC'NLDASR                      | F |
|    |        |                                     |      |    |    |       |      | 1099 | 664.0335 | 1989.079 | 3 | 1989.083 | -0.0038 | 0 | 47.55  | 0.00055  | K | ITVVGVGAVGMAC'ASILMK               | D |
|    |        |                                     |      |    |    |       |      | 1106 | 669.3635 | 2005.069 | 3 | 2005.077 | -0.0089 | 0 | 61.03  | 3.20E-05 | K | ITVVGVGAVGMAC'ASILMK               | D |
|    |        |                                     |      |    |    |       |      | 1107 | 669.3635 | 2005.069 | 3 | 2005.077 | -0.0085 | 0 | 45.32  | 0.0005   | K | ITVVGVGAVGMAC'ASILMK               | D |
|    |        |                                     |      |    |    |       |      | 442  | 537.2952 | 1072.576 | 2 | 1072.576 | -0.0005 | 0 | 44.43  | 0.0075   | R | DALNIETAVK                         | D |
|    |        |                                     |      |    |    |       |      | 677  | 611.8004 | 1221.586 | 2 | 1221.588 | -0.0016 | 0 | 49.32  | 0.0015   | K | TPAYDASELK                         | A |
|    |        |                                     |      |    |    |       |      | 706  | 622.8145 | 1243.615 | 2 | 1243.616 | -0.0012 | 0 | 61.08  | 9.30E-05 | R | TNQELEINR                          | V |
|    |        |                                     |      |    |    |       |      | 944  | 825.9886 | 1649.963 | 2 | 1649.972 | -0.0009 | 0 | 29.91  | 0.0099   | K | SALSGHLETIVLGLLK                   | E |
| 47 | P16858 | Glyceraldehyde-3-phosphate dehydrog | 2458 | 59 | 21 | 35787 | 8.44 | 721  | 614.3138 | 1226.613 | 2 | 1226.604 | 0.0092  | 0 | 75.07  | 3.60E-06 | R | VVDLMAYM@ASK                       | E |
|    |        |                                     |      |    |    |       |      | 747  | 622.3058 | 1242.597 | 2 | 1242.599 | -0.0017 | 0 | 77.51  | 1.50E-06 | R | VVDLMAYM@ASK                       | E |
|    |        |                                     |      |    |    |       |      | 748  | 622.3062 | 1242.598 | 2 | 1242.599 | -0.0011 | 0 | 56.25  | 0.00021  | R | VVDLMAYM@ASK                       | E |
|    |        |                                     |      |    |    |       |      | 749  | 622.3062 | 1242.598 | 2 | 1242.599 | -0.0011 | 0 | 65.92  | 2.30E-05 | R | VVDLMAYM@ASK                       | E |
|    |        |                                     |      |    |    |       |      | 750  | 622.3064 | 1242.598 | 2 | 1242.599 | -0.0006 | 0 | 66.45  | 2.00E-05 | R | VVDLMAYM@ASK                       | E |
|    |        |                                     |      |    |    |       |      | 751  | 622.3065 | 1242.598 | 2 | 1242.599 | -0.0005 | 0 | 40.8   | 0.0073   | R | VVDLMAYM@ASK                       | E |
|    |        |                                     |      |    |    |       |      | 768  | 630.3033 | 1258.592 | 2 | 1258.594 | -0.0016 | 0 | 56.17  | 0.00019  | R | VVDLMAYM@ASK                       | E |
|    |        |                                     |      |    |    |       |      | 770  | 630.3035 | 1258.592 | 2 | 1258.594 | -0.0014 | 0 | 54.4   | 0.00029  | R | VVDLMAYM@ASK                       | E |
|    |        |                                     |      |    |    |       |      | 875  | 685.3747 | 1368.735 | 2 | 1368.736 | -0.0013 | 0 | 51.12  | 0.00065  | R | GAQNIPASTGAAK                      | A |
|    |        |                                     |      |    |    |       |      | 876  | 685.3761 | 1368.738 | 2 | 1368.736 | 0.0015  | 0 | 65.68  | 2.10E-05 | R | GAQNIPASTGAAK                      | A |
|    |        |                                     |      |    |    |       |      | 881  | 686.8273 | 1371.64  | 2 | 1371.641 | -0.0014 | 1 | 78.64  | 1.20E-06 | R | VVDLMAYM@ASK                       | E |
|    |        |                                     |      |    |    |       |      | 895  | 694.8245 | 1387.635 | 2 | 1387.636 | -0.0018 | 1 | 87.55  | 1.20E-07 | R | VVDLMAYM@ASK                       | E |
|    |        |                                     |      |    |    |       |      | 896  | 694.8245 | 1387.635 | 2 | 1387.636 | -0.0018 | 1 | 69.02  | 8.30E-05 | R | VVDLMAYM@ASK                       | E |
|    |        |                                     |      |    |    |       |      | 990  | 778.9077 | 1555.801 | 2 | 1555.803 | -0.0002 | 0 | 78.43  | 1.20E-06 | R | VPTPNVSVLDT'C'R                    | L |
|    |        |                                     |      |    |    |       |      | 991  | 778.908  | 1555.801 | 2 | 1555.803 | -0.0015 | 0 | 80.78  | 7.00E-07 | R | VPTPNVSVLDT'C'R                    | L |
|    |        |                                     |      |    |    |       |      | 992  | 778.908  | 1555.802 | 2 | 1555.803 | -0.0014 | 0 | 56.65  | 0.00018  | R | VPTPNVSVLDT'C'R                    | L |
|    |        |                                     |      |    |    |       |      | 994  | 778.9081 | 1555.802 | 2 | 1555.803 | -0.0011 | 0 | 96.61  | 1.80E-08 | R | VPTPNVSVLDT'C'R                    | L |
|    |        |                                     |      |    |    |       |      | 1044 | 543.3217 | 1626.943 | 3 | 1626.946 | -0.0024 | 0 | 43.74  | 0.00075  | K | LVINGKPTIFQER                      | D |
|    |        |                                     |      |    |    |       |      | 1045 | 543.3223 | 1626.945 | 3 | 1626.946 | -0.0007 | 0 | 55.23  | 5.30E-05 | K | LVINGKPTIFQER                      | D |
|    |        |                                     |      |    |    |       |      | 1046 | 814.4799 | 1626.945 | 3 | 1626.946 | -0.0004 | 0 | 51.42  | 0.00013  | K | LVINGKPTIFQER                      | D |
|    |        |                                     |      |    |    |       |      | 1047 | 543.3224 | 1626.946 | 3 | 1626.946 | -0.0002 | 0 | 58.27  | 2.90E-05 | K | LVINGKPTIFQER                      | D |
|    |        |                                     |      |    |    |       |      | 1131 | 893.937  | 1778.789 | 2 | 1778.79  | -0.001  | 0 | 55.42  | 0.00014  | R | LISWYDNEYGSNR                      | V |
|    |        |                                     |      |    |    |       |      |      |          |          |   |          |         |   |        |          |   |                                    |   |

|  |  |  |  |  |  |      |          |          |   |          |         |   |        |          |   |                              |   |
|--|--|--|--|--|--|------|----------|----------|---|----------|---------|---|--------|----------|---|------------------------------|---|
|  |  |  |  |  |  | 869  | 686.8276 | 1371.641 | 2 | 1371.641 | -0.0007 | 1 | 81.98  | 5.40E-07 | R | VVDLM@YMASKE                 |   |
|  |  |  |  |  |  | 880  | 694.8245 | 1387.635 | 2 | 1387.636 | -0.0018 | 1 | 95.84  | 1.70E-08 | R | VVDLM@YMASKE                 |   |
|  |  |  |  |  |  | 881  | 694.8247 | 1387.635 | 2 | 1387.636 | -0.0015 | 1 | 65.08  | 2.10E-05 | R | VVDLM@YMASKE                 |   |
|  |  |  |  |  |  | 981  | 519.6075 | 1555.801 | 3 | 1555.803 | -0.0021 | 0 | 44.27  | 0.003    | R | VPTPNVSVDLTC'R               | L |
|  |  |  |  |  |  | 982  | 778.9078 | 1555.802 | 3 | 1555.803 | -0.0019 | 0 | 95.85  | 2.20E-08 | R | VPTPNVSVDLTC'R               | L |
|  |  |  |  |  |  | 984  | 778.9081 | 1555.802 | 3 | 1555.803 | -0.0011 | 0 | 95.34  | 2.40E-08 | R | VPTPNVSVDLTC'R               | L |
|  |  |  |  |  |  | 985  | 778.9082 | 1555.802 | 3 | 1555.803 | -0.001  | 0 | 91.87  | 5.40E-08 | R | VPTPNVSVDLTC'R               | L |
|  |  |  |  |  |  | 987  | 778.9084 | 1555.802 | 3 | 1555.803 | -0.0006 | 0 | 75.13  | 2.60E-06 | R | VPTPNVSVDLTC'R               | L |
|  |  |  |  |  |  | 989  | 778.9088 | 1555.801 | 3 | 1555.803 | 0.0001  | 0 | 55.71  | 0.0022   | R | VPTPNVSVDLTC'R               | L |
|  |  |  |  |  |  | 1042 | 543.322  | 1626.944 | 3 | 1626.946 | -0.0017 | 0 | 40.82  | 0.0015   | R | LVINGKPTIFQER                | D |
|  |  |  |  |  |  | 1043 | 543.3222 | 1626.945 | 3 | 1626.946 | -0.0009 | 0 | 58.26  | 2.60E-05 | R | LVINGKPTIFQER                | D |
|  |  |  |  |  |  | 1044 | 814.4797 | 1626.945 | 2 | 1626.946 | -0.0009 | 0 | 44.81  | 0.00058  | R | LVINGKPTIFQER                | D |
|  |  |  |  |  |  | 1045 | 814.4798 | 1626.945 | 2 | 1626.946 | -0.0007 | 0 | 40.96  | 0.0014   | R | LVINGKPTIFQER                | D |
|  |  |  |  |  |  | 1143 | 890.4015 | 1778.789 | 2 | 1778.779 | -0.0014 | 0 | 64.77  | 7.0E-05  | R | LISWYDNEYGSNR                | V |
|  |  |  |  |  |  | 1144 | 890.4017 | 1778.789 | 2 | 1778.779 | -0.0011 | 0 | 62.91  | 2.50E-05 | R | LISWYDNEYGSNR                | V |
|  |  |  |  |  |  | 1145 | 593.937  | 1778.789 | 3 | 1778.779 | -0.0008 | 0 | 53.21  | 0.00023  | R | LISWYDNEYGSNR                | V |
|  |  |  |  |  |  | 1146 | 890.4022 | 1778.779 | 2 | 1778.779 | -0.0001 | 0 | 63.19  | 2.20E-05 | R | LISWYDNEYGSNR                | V |
|  |  |  |  |  |  | 1186 | 910.4547 | 1818.895 | 2 | 1818.897 | -0.002  | 0 | 67.33  | 1.50E-05 | R | IVSNASC'TTNC'LAPLAK          | V |
|  |  |  |  |  |  | 1187 | 607.306  | 1818.896 | 3 | 1818.897 | -0.0005 | 0 | 52.97  | 0.00052  | R | IVSNASC'TTNC'LAPLAK          | V |
|  |  |  |  |  |  | 1188 | 910.4557 | 1818.897 | 2 | 1818.897 | 0       | 0 | 77.7   | 1.50E-06 | R | IVSNASC'TTNC'LAPLAK          | V |
|  |  |  |  |  |  | 1349 | 1115.054 | 2228.094 | 2 | 2228.097 | -0.0029 | 0 | 60.39  | 5.20E-05 | R | VIISAPADAPM@FVM@GVNHEK       | Y |
|  |  |  |  |  |  | 1360 | 1123.052 | 2244.09  | 2 | 2244.092 | -0.0022 | 0 | 54.01  | 0.00022  | R | VIISAPADAPM@FVM@GVNHEK       | Y |
|  |  |  |  |  |  | 1362 | 749.0275 | 2244.091 | 3 | 2244.092 | -0.0011 | 0 | 34.43  | 0.021    | R | VIISAPADAPM@FVM@GVNHEK       | Y |
|  |  |  |  |  |  | 1394 | 1146.023 | 2290.046 | 2 | 2290.046 | -0.0004 | 0 | 111.65 | 3.10E-10 | R | WGEAGAEVVESTGVFTTMEK         | A |
|  |  |  |  |  |  | 1395 | 764.3562 | 2290.047 | 3 | 2290.046 | 0.0004  | 0 | 46.79  | 0.00094  | R | WGEAGAEVVESTGVFTTMEK         | A |
|  |  |  |  |  |  | 1414 | 1154.027 | 2306.039 | 2 | 2306.041 | -0.0019 | 0 | 125.15 | 1.10E-11 | R | WGEAGAEVVESTGVFTTMEK         | A |
|  |  |  |  |  |  | 1415 | 769.8673 | 2306.04  | 3 | 2306.041 | -0.0014 | 0 | 92.62  | 2.0E-08  | R | RVIISAPADAPM@FVM@GVNHEK      | A |
|  |  |  |  |  |  | 1455 | 801.0707 | 2400.19  | 3 | 2400.193 | -0.0026 | 1 | 54.37  | 0.00017  | R | RVIISAPADAPM@FVM@GVNHEK      | A |
|  |  |  |  |  |  | 1480 | 871.1208 | 2610.341 | 3 | 2610.348 | -0.0071 | 0 | 38.38  | 0.0049   | R | VHDFNFVIGELM@TTVHAITATOK     | T |
|  |  |  |  |  |  | 1481 | 1306.178 | 2610.342 | 2 | 2610.348 | -0.0057 | 0 | 61.78  | 2.30E-05 | R | VHDFNFVIGELM@TTVHAITATOK     | T |
|  |  |  |  |  |  | 1482 | 653.5933 | 2610.344 | 3 | 2610.348 | -0.0037 | 0 | 36.48  | 0.0067   | R | VHDFNFVIGELM@TTVHAITATOK     | T |
|  |  |  |  |  |  | 1483 | 653.5934 | 2610.344 | 3 | 2610.348 | -0.0037 | 0 | 33.34  | 0.014    | R | VHDFNFVIGELM@TTVHAITATOK     | T |
|  |  |  |  |  |  | 1484 | 871.1226 | 2610.346 | 3 | 2610.348 | -0.0016 | 0 | 65.25  | 1.00E-05 | R | VHDFNFVIGELM@TTVHAITATOK     | T |
|  |  |  |  |  |  | 1486 | 871.1229 | 2610.347 | 3 | 2610.348 | -0.0007 | 0 | 42.71  | 0.0018   | R | VHDFNFVIGELM@TTVHAITATOK     | T |
|  |  |  |  |  |  | 1487 | 871.1232 | 2610.348 | 3 | 2610.348 | 0.0001  | 0 | 65.28  | 9.90E-06 | R | VHDFNFVIGELM@TTVHAITATOK     | T |
|  |  |  |  |  |  | 1488 | 653.5942 | 2610.348 | 3 | 2610.348 | 0.0002  | 0 | 33.77  | 0.014    | R | VHDFNFVIGELM@TTVHAITATOK     | T |
|  |  |  |  |  |  | 1489 | 871.1236 | 2610.349 | 3 | 2610.348 | 0.0014  | 0 | 62.15  | 2.00E-05 | R | VHDFNFVIGELM@TTVHAITATOK     | T |
|  |  |  |  |  |  | 1491 | 871.124  | 2610.35  | 3 | 2610.348 | 0.0025  | 0 | 56.86  | 7.10E-05 | R | VHDFNFVIGELM@TTVHAITATOK     | T |
|  |  |  |  |  |  | 1492 | 653.5952 | 2610.352 | 3 | 2610.348 | 0.0042  | 0 | 37.78  | 0.0051   | R | VHDFNFVIGELM@TTVHAITATOK     | T |
|  |  |  |  |  |  | 1552 | 1113.527 | 3337.56  | 3 | 3337.568 | -0.0073 | 0 | 74.83  | 6.70E-07 | R | VEIANDPFIDILNYM@VYMFQYDSTHGK | F |
|  |  |  |  |  |  | 1572 | 1011.234 | 4048.906 | 4 | 4048.906 | 0.0056  | 0 | 28.94  | 0.023    | R | VEIANDPFIDILNYM@VYMFQYDSTHGK | F |
|  |  |  |  |  |  | 316  | 496.7735 | 991.5324 | 2 | 991.5338 | -0.0014 | 0 | 44.88  | 0.0042   | R | ANTFVAELK                    | G |
|  |  |  |  |  |  | 317  | 496.7736 | 991.5326 | 2 | 991.5338 | -0.0013 | 0 | 60.87  | 0.0001   | R | ANTFVAELK                    | G |
|  |  |  |  |  |  | 319  | 496.7738 | 991.5331 | 2 | 991.5338 | -0.0008 | 0 | 57.16  | 0.00024  | R | ANTFVAELK                    | G |
|  |  |  |  |  |  | 460  | 537.2942 | 1072.574 | 2 | 1072.576 | -0.0025 | 0 | 43.79  | 0.0081   | R | IEAGTEVVK                    | A |
|  |  |  |  |  |  | 461  | 537.2945 | 1072.574 | 2 | 1072.576 | -0.002  | 0 | 64.69  | 6.55E-05 | R | IEAGTEVVK                    | A |
|  |  |  |  |  |  | 463  | 537.2946 | 1072.575 | 2 | 1072.576 | -0.0017 | 0 | 59.95  | 0.0002   | R | IEAGTEVVK                    | A |
|  |  |  |  |  |  | 518  | 557.8118 | 1113.609 | 2 | 1113.61  | -0.0012 | 0 | 62.88  | 6.90E-05 | R | MIAEAIPELK                   | A |
|  |  |  |  |  |  | 519  | 557.8119 | 1113.609 | 2 | 1113.61  | -0.0011 | 0 | 59.21  | 0.00016  | R | MIAEAIPELK                   | A |
|  |  |  |  |  |  | 547  | 565.8094 | 1129.604 | 2 | 1129.605 | -0.0009 | 0 | 49.34  | 0.0017   | R | MIAEAIPELK                   | A |
|  |  |  |  |  |  | 548  | 565.8095 | 1129.605 | 2 | 1129.605 | -0.0008 | 0 | 66.11  | 3.60E-05 | R | MIAEAIPELK                   | A |
|  |  |  |  |  |  | 571  | 574.3319 | 1146.649 | 2 | 1146.651 | -0.0017 | 0 | 64.78  | 2.80E-05 | R | VNVFVIGGHAGK                 | T |
|  |  |  |  |  |  | 575  | 383.2244 | 1146.651 | 3 | 1146.651 | 0.0003  | 0 | 37.43  | 0.013    | R | VNVFVIGGHAGK                 | T |
|  |  |  |  |  |  | 724  | 617.3632 | 1232.712 | 2 | 1232.713 | -0.0011 | 0 | 65.42  | 1.30E-05 | R | IFGVTTLDIVR                  | A |
|  |  |  |  |  |  | 726  | 617.3634 | 1232.712 | 2 | 1232.713 | -0.0006 | 0 | 47.66  | 0.00077  | R | IFGVTTLDIVR                  | A |
|  |  |  |  |  |  | 822  | 664.3394 | 1326.664 | 2 | 1326.664 | -0.0001 | 0 | 70.62  | 9.00E-06 | R | FVFLVDMAMNGK                 | E |
|  |  |  |  |  |  | 832  | 669.8637 | 1337.713 | 2 | 1337.713 | 0.0003  | 0 | 71.58  | 6.70E-06 | R | GC'DVVPVAGPVPR               | K |
|  |  |  |  |  |  | 838  | 672.3362 | 1342.658 | 2 | 1342.659 | -0.0012 | 0 | 76.16  | 2.60E-06 | R | FVFLVDMAMNGK                 | E |
|  |  |  |  |  |  | 857  | 684.8259 | 1367.637 | 3 | 1367.639 | -0.0019 | 0 | 69.78  | 3.70E-06 | R | EGVVECS'FVQSK                | E |
|  |  |  |  |  |  | 858  | 684.8261 | 1367.638 | 3 | 1367.639 | -0.0015 | 0 | 82.48  | 5.40E-07 | R | EGVVECS'FVQSK                | E |
|  |  |  |  |  |  | 866  | 685.889  | 1369.763 | 2 | 1369.764 | -0.0005 | 0 | 69.28  | 7.80E-06 | R | TIPLISOC'TPK                 | V |
|  |  |  |  |  |  | 925  | 727.8558 | 1453.697 | 2 | 1453.698 | -0.0013 | 0 | 93.38  | 5.20E-08 | R | AGAGSATLSMAYAGAR             | F |
|  |  |  |  |  |  | 926  | 727.856  | 1453.698 | 2 | 1453.698 | -0.0008 | 0 | 94.82  | 3.90E-08 | R | AGAGSATLSMAYAGAR             | F |
|  |  |  |  |  |  | 935  | 745.8526 | 1469.691 | 2 | 1469.693 | -0.0026 | 0 | 54.94  | 0.0002   | R | AGAGSATLSMAYAGAR             | F |
|  |  |  |  |  |  | 937  | 735.853  | 1469.691 | 2 | 1469.693 | -0.0019 | 0 | 79.04  | 1.20E-06 | R | AGAGSATLSMAYAGAR             | F |
|  |  |  |  |  |  | 938  | 735.8531 | 1469.692 | 2 | 1469.693 | -0.0015 | 0 | 53.24  | 0.00047  | R | AGAGSATLSMAYAGAR             | F |
|  |  |  |  |  |  | 939  | 735.8532 | 1469.692 | 2 | 1469.693 | -0.0014 | 0 | 44.13  | 0.0038   | R | AGAGSATLSMAYAGAR             | F |
|  |  |  |  |  |  | 948  | 745.3704 | 1489.728 | 2 | 1489.728 | -0.002  | 0 | 40.49  | 0.009    | R | GVLPQDQLT'LK                 | G |
|  |  |  |  |  |  | 949  | 745.3713 | 1489.728 | 2 | 1489.728 | -0.0001 | 0 | 41.04  | 0.0078   | R | GVLPQDQLT'LK                 | G |
|  |  |  |  |  |  | 992  | 780.903  | 1559.791 | 2 | 1559.794 | -0.003  | 0 | 40.06  | 0.0094   | R | VDFPDQQLATLGR                | I |
|  |  |  |  |  |  | 994  | 780.9037 | 1559.793 | 2 | 1559.794 | -0.0016 | 0 | 71.15  | 7.90E-06 | R | VDFPDQQLATLGR                | I |
|  |  |  |  |  |  | 995  | 780.9038 | 1559.793 | 2 | 1559.794 | -0.0013 | 0 | 88.6   | 1.40E-07 | R | VDFPDQQLATLGR                | I |
|  |  |  |  |  |  | 996  | 780.9041 | 1559.794 | 2 | 1559.794 | -0.0008 | 0 | 83.15  | 4.90E-07 | R | VDFPDQQLATLGR                | I |
|  |  |  |  |  |  | 1126 | 879.934  | 1757.854 | 2 | 1757.855 | -0.0011 | 0 | 56.15  | 0.0021   | R | ETEC'TYFSTPLLLGK             | K |
|  |  |  |  |  |  | 1128 | 879.9344 | 1757.854 | 2 | 1757.855 | -0.0004 | 0 | 68.44  | 1        |   |                              |   |



|    |        |                        |      |    |    |       |      |  |                                                                                           |
|----|--------|------------------------|------|----|----|-------|------|--|-------------------------------------------------------------------------------------------|
|    |        |                        |      |    |    |       |      |  | 798 664.3388 1326.663 2 1326.664 -0.0012 0 43.55 0.0048 R FVFSLVDAMNGK E                  |
|    |        |                        |      |    |    |       |      |  | 799 664.3392 1326.664 2 1326.664 -0.0003 0 85.19 3.10E-07 R FVFSLVDAMNGK E                |
|    |        |                        |      |    |    |       |      |  | 809 669.8633 1337.712 2 1337.713 -0.0005 0 86.25 2.30E-07 K GC'DVVPVAGVPR E               |
|    |        |                        |      |    |    |       |      |  | 811 672.3363 1342.658 2 1342.659 -0.0011 0 61.53 7.40E-05 K FVFSLVDAMNGK E                |
|    |        |                        |      |    |    |       |      |  | 834 684.8257 1367.637 2 1367.639 0.0022 0 73.02 4.50E-06 K EGVV'EC'SFVQSK E               |
|    |        |                        |      |    |    |       |      |  | 835 684.8262 1367.638 2 1367.639 -0.0013 0 37.82 0.016 K EGVV'EC'SFVQSK E                 |
|    |        |                        |      |    |    |       |      |  | 845 685.8889 1369.763 2 1369.764 -0.0006 0 64.05 2.60E-05 K TIIPUSOCTPK E                 |
|    |        |                        |      |    |    |       |      |  | 920 727.856 1453.697 2 1453.698 -0.001 0 44.09 0.0041 K AGASATLSMAYAGAR F                 |
|    |        |                        |      |    |    |       |      |  | 930 735.8526 1469.691 2 1469.693 -0.0026 0 72.72 4.30E-06 K AGASATLSMAYAGAR F             |
|    |        |                        |      |    |    |       |      |  | 932 735.8533 1469.692 2 1469.693 -0.0013 0 76.85 2.10E-06 K AGASATLSMAYAGAR F             |
|    |        |                        |      |    |    |       |      |  | 933 735.8536 1469.693 2 1469.693 -0.0005 0 64.12 3.70E-05 K AGASATLSMAYAGAR F             |
|    |        |                        |      |    |    |       |      |  | 934 735.8536 1469.693 2 1469.693 -0.0005 0 59.25 0.00011 K AGASATLSMAYAGAR F              |
|    |        |                        |      |    |    |       |      |  | 942 745.3708 1488.727 2 1488.728 -0.0012 0 35.85 0.026 K GYLQPEQLPDC'LK F                 |
|    |        |                        |      |    |    |       |      |  | 985 780.902 1559.792 2 1559.794 -0.0049 0 87.12 2.10E-07 K VDFPQDLATLGR I                 |
|    |        |                        |      |    |    |       |      |  | 986 780.9032 1559.792 2 1559.794 -0.0025 0 72.97 5.00E-06 K VDFPQDLATLGR I                |
|    |        |                        |      |    |    |       |      |  | 992 780.9038 1559.793 2 1559.794 -0.0013 0 84.87 3.40E-07 K VDFPQDLATLGR I                |
|    |        |                        |      |    |    |       |      |  | 993 780.9038 1559.793 2 1559.794 -0.0013 0 86.56 2.30E-07 K VDFPQDLATLGR I                |
|    |        |                        |      |    |    |       |      |  | 1127 879.9338 1757.853 2 1757.855 -0.0016 0 64.62 2.90E-05 K ETEC'TYFSTPLLLK K            |
|    |        |                        |      |    |    |       |      |  | 1129 879.9363 1757.856 2 1757.855 0.0034 0 42.4 0.0051 K ETEC'TYFSTPLLLK K                |
|    |        |                        |      |    |    |       |      |  | 1158 598.3674 1792.08 3 1792.082 -0.0019 0 58.35 3.60E-06 K VAVLGASGGIQLPQLLLK N          |
|    |        |                        |      |    |    |       |      |  | 1159 598.3676 1792.081 3 1792.082 -0.0014 0 35.66 0.00083 K VAVLGASGGIQLPQLLLK N          |
|    |        |                        |      |    |    |       |      |  | 1160 897.0483 1792.082 2 1792.082 -0.0001 0 115.39 1.20E-11 K VAVLGASGGIQLPQLLLK N        |
|    |        |                        |      |    |    |       |      |  | 1161 897.0488 1792.083 2 1792.082 0.0008 0 32.26 0.0023 K VAVLGASGGIQLPQLLLK N            |
|    |        |                        |      |    |    |       |      |  | 1162 897.0491 1792.084 2 1792.082 0.0014 0 100.13 3.80E-10 K VAVLGASGGIQLPQLLLK N         |
|    |        |                        |      |    |    |       |      |  | 1505 599.0662 2392.236 4 2392.239 -0.0029 0 40.04 0.0035 R LTYLDIAHTPGVAADLSHETR A        |
|    |        |                        |      |    |    |       |      |  | 1506 798.4193 2392.236 3 2392.239 -0.0027 0 87.77 5.80E-08 R LTYLDIAHTPGVAADLSHETR A      |
|    |        |                        |      |    |    |       |      |  | 1507 798.4193 2392.236 3 2392.239 -0.0027 0 95.27 1.00E-08 R LTYLDIAHTPGVAADLSHETR A      |
|    |        |                        |      |    |    |       |      |  | 1508 798.4194 2392.237 3 2392.239 -0.0022 0 38.6 0.005 R LTYLDIAHTPGVAADLSHETR A          |
|    |        |                        |      |    |    |       |      |  | 1510 1197.126 2392.238 2 2392.239 -0.001 0 100.52 3.40E-09 R LTYLDIAHTPGVAADLSHETR A      |
|    |        |                        |      |    |    |       |      |  | 363 515.8099 1029.605 2 1029.607 -0.0017 0 61.81 5.50E-05 K LTLSDALDGK N                  |
|    |        |                        |      |    |    |       |      |  | 673 607.313 1212.611 2 1212.614 -0.0025 0 52.12 0.00063 R VTQSNFAVYQK T                   |
|    |        |                        |      |    |    |       |      |  | 875 700.8109 1399.607 2 1399.608 0.0007 0 35.43 0.014 YQVAFATGYSKAK T                     |
|    |        |                        |      |    |    |       |      |  | 876 700.837 1399.605 2 1399.662 -0.0026 0 34.86 0.029 K LTFDSSFSPTGK T                    |
|    |        |                        |      |    |    |       |      |  |                                                                                           |
| 50 | P62259 | 14-3-3 protein epsilon | 1736 | 54 | 28 | 29155 | 4.63 |  | 223 454.2659 906.5172 2 906.5174 -0.0002 0 32.81 0.039 R NLLSVAYK N                       |
|    |        |                        |      |    |    |       |      |  | 236 459.2687 916.5225 2 916.5229 0 38.25 0.028 R ISSIEQK E                                |
|    |        |                        |      |    |    |       |      |  | 238 459.2689 916.523 2 916.5229 0.0003 0 48.66 0.0023 R ISSIEQK E                         |
|    |        |                        |      |    |    |       |      |  | 336 497.2497 992.4848 2 992.4848 -0.0001 0 41.88 0.013 R QM@VETELK L                      |
|    |        |                        |      |    |    |       |      |  | 559 566.2385 1130.462 2 1130.462 0 47.32 0.0005 R YDEM@VESMK K                            |
|    |        |                        |      |    |    |       |      |  | 583 574.2355 1146.457 2 1146.457 -0.0008 0 47.95 0.00027 R YDEM@VESMK K                   |
|    |        |                        |      |    |    |       |      |  | 584 574.2359 1146.457 2 1146.457 0 36.54 0 0 YDEM@VESMK K                                 |
|    |        |                        |      |    |    |       |      |  | 615 582.2325 1162.451 2 1162.452 -0.0017 0 49.6 8.80E-05 R YDEM@VESM@K K                  |
|    |        |                        |      |    |    |       |      |  | 664 595.334 1188.653 2 1188.654 -0.0002 0 64.37 4.10E-05 K DSTLIMQLLR D                   |
|    |        |                        |      |    |    |       |      |  | 674 597.8035 1193.592 2 1193.593 -0.0004 0 57.39 0.00027 K EAAENSLVAYK R                  |
|    |        |                        |      |    |    |       |      |  | 705 603.311 1204.648 2 1204.649 -0.001 0 54.28 0.00052 K DSTLIMQLLR D                     |
|    |        |                        |      |    |    |       |      |  | 706 603.314 1204.648 2 1204.649 -0.0003 0 54.42 0.00049 K DSTLIMQLLR D                    |
|    |        |                        |      |    |    |       |      |  | 745 619.3303 1236.646 2 1236.646 -0.0003 0 37.34 0.022 K HLIPIAANTGESK V                  |
|    |        |                        |      |    |    |       |      |  | 746 619.3304 1236.646 2 1236.646 0.0001 0 55.18 0.00037 K HLIPIAANTGESK V                 |
|    |        |                        |      |    |    |       |      |  | 749 413.2231 1236.648 3 1236.646 0.0014 0 37.33 0.021 K HLIPIAANTGESK V                   |
|    |        |                        |      |    |    |       |      |  | 755 626.7896 1255.583 2 1255.583 -0.0007 0 59.87 8.70E-05 R YLAEFATGNDR Y                 |
|    |        |                        |      |    |    |       |      |  | 766 628.7889 1255.583 2 1255.583 -0.0001 0 49.21 0.00099 R YLAEFATGNDR Y                  |
|    |        |                        |      |    |    |       |      |  | 768 420.5265 1258.558 3 1258.557 0.0004 1 32.56 0.028 R YDEM@VESMKK V                     |
|    |        |                        |      |    |    |       |      |  | 802 645.2783 1288.542 2 1288.542 0.0001 0 53.96 0.00013 K EALQDVEDNG -                    |
|    |        |                        |      |    |    |       |      |  | 841 661.851 1321.687 2 1321.688 -0.0004 1 58.52 0.00016 R KEAENSLSVAYK A                  |
|    |        |                        |      |    |    |       |      |  | 860 762.8457 1393.677 2 1393.678 0.0001 0 40.44 0.0004 Y YLAEFATGNDR Y                    |
|    |        |                        |      |    |    |       |      |  | 902 709.3801 1416.746 2 1416.746 -0.0004 1 44.89 0.0039 R ISSIEQK E                       |
|    |        |                        |      |    |    |       |      |  | 916 724.3582 1446.702 2 1446.702 -0.0007 0 91.22 6.90E-08 R VAGMDVLTVEER N                |
|    |        |                        |      |    |    |       |      |  | 917 724.3584 1446.702 2 1446.702 0.0002 0 78.88 1.20E-06 K VAGMDVLTVEER N                 |
|    |        |                        |      |    |    |       |      |  | 925 732.3554 1462.699 2 1462.697 -0.0011 0 94.42 3.30E-08 K VAGMDVLTVEER N                |
|    |        |                        |      |    |    |       |      |  | 926 732.3565 1462.699 2 1462.697 0.0011 0 55.69 0.00025 K VAGMDVLTVEER N                  |
|    |        |                        |      |    |    |       |      |  | 937 738.8754 1475.736 2 1475.736 -0.0001 0 68.18 1.70E-05 K LIC'C'DILDVLDK H              |
|    |        |                        |      |    |    |       |      |  | 938 738.876 1475.737 2 1475.736 0.001 0 78.66 1.40E-06 K LIC'C'DILDVLDK H                 |
|    |        |                        |      |    |    |       |      |  | 958 762.8537 1523.693 2 1523.693 0.0003 1 31.87 0.048 - #MDREDLVYQAK L                    |
|    |        |                        |      |    |    |       |      |  | 960 762.8541 1523.694 2 1523.693 0.0011 0 40.41 0.0066 K #MDREDLVYQAK L                   |
|    |        |                        |      |    |    |       |      |  | 966 770.8506 1539.687 2 1539.688 -0.0008 1 31.26 0.04 - #M@DREDLVYQAK L                   |
|    |        |                        |      |    |    |       |      |  | 980 525.9392 1574.796 3 1574.797 -0.0016 1 35.12 0.032 K KVAGMDVLTVEER N                  |
|    |        |                        |      |    |    |       |      |  | 988 796.4014 1590.786 2 1590.792 -0.0004 1 48.34 0.00015 K KVAGMDVLTVEER N                |
|    |        |                        |      |    |    |       |      |  | 1086 607.3165 1818.928 3 1818.93 -0.0022 0 41.63 0.0048 K AASDIAMTELPPTPIR L              |
|    |        |                        |      |    |    |       |      |  | 1089 607.3166 1818.928 3 1818.93 -0.0019 0 31.95 0.05 K AASDIAMTELPPTPIR L                |
|    |        |                        |      |    |    |       |      |  | 1090 607.3167 1818.928 3 1818.93 -0.0017 0 32.78 0.042 K AASDIAMTELPPTPIR L               |
|    |        |                        |      |    |    |       |      |  | 1091 607.3169 1818.929 3 1818.93 -0.0009 0 79.15 9.30E-07 K AASDIAMTELPPTPIR L            |
|    |        |                        |      |    |    |       |      |  | 1093 607.3171 1818.93 3 1818.93 -0.0002 0 50.66 0.00063 K AASDIAMTELPPTPIR L              |
|    |        |                        |      |    |    |       |      |  | 1094 610.4722 1818.93 3 1818.93 0 50.85 0.00061 K AASDIAMTELPPTPIR L                      |
|    |        |                        |      |    |    |       |      |  | 1095 607.3182 1818.933 3 1818.93 0.0029 0 45.59 0.002 K AASDIAMTELPPTPIR L                |
|    |        |                        |      |    |    |       |      |  | 1104 612.6479 1834.922 3 1834.925 -0.0027 0 81.34 5.30E-07 K AASDIAM@TELPPTPIR L          |
|    |        |                        |      |    |    |       |      |  | 1105 612.6481 1834.922 3 1834.925 -0.0023 0 63.48 3.30E-05 K AASDIAM@TELPPTPIR L          |
|    |        |                        |      |    |    |       |      |  | 1106 618.4687 1834.923 3 1834.925 -0.0019 0 61.57 5.40E-05 K AASDIAM@TELPPTPIR L          |
|    |        |                        |      |    |    |       |      |  | 1108 612.6485 1834.924 3 1834.925 -0.001 0 69.57 8.60E-06 K AASDIAM@TELPPTPIR L           |
|    |        |                        |      |    |    |       |      |  | 1109 612.6486 1834.924 3 1834.925 -0.0009 0 57.69 0.00013 K AASDIAM@TELPPTPIR L           |
|    |        |                        |      |    |    |       |      |  | 1110 612.6486 1834.924 3 1834.925 -0.0009 0 56.83 0.00016 K AASDIAM@TELPPTPIR L           |
|    |        |                        |      |    |    |       |      |  | 1111 612.6486 1834.924 3 1834.925 -0.0007 0 46.39 0.00018 K AASDIAM@TELPPTPIR L           |
|    |        |                        |      |    |    |       |      |  | 1112 612.649 1834.925 3 1834.925 0.0004 0 55.12 0.00022 K AASDIAM@TELPPTPIR L             |
|    |        |                        |      |    |    |       |      |  | 1187 696.6602 2086.959 3 2086.958 0.0004 0 56.74 0.00011 K AAFDDIAELDTLSEESYK D           |
|    |        |                        |      |    |    |       |      |  | 1188 1044.487 2086.96 2 2086.958 0.0013 0 97.89 8.00E-09 K AAFDDIAELDTLSEESYK D           |
|    |        |                        |      |    |    |       |      |  | 1326 777.7382 2330.193 3 2330.195 -0.0002 0 50.26 0.0004 R LGLANFSVYVEILNSPDR A           |
|    |        |                        |      |    |    |       |      |  | 1327 1166.105 2330.194 2 2330.195 -0.0002 0 117.31 7.40E-11 R LGLANFSVYVEILNSPDR A        |
|    |        |                        |      |    |    |       |      |  | 1450 692.205 3273.592 2 3273.596 0.0046 0 86.51 0.0004 K AAFDDIAELDTLSEESYKSTLIM@QLLR D   |
|    |        |                        |      |    |    |       |      |  | 1451 819.4059 3273.594 4 3273.596 -0.0018 1 42.32 0.0018 K AAFDDIAELDTLSEESYKSTLIM@QLLR D |
|    |        |                        |      |    |    |       |      |  | 324 494.2455 986.4764 2 986.4781 -0.0017 0 38.26 0.016 K AEGDAAALNR R                     |
|    |        |                        |      |    |    |       |      |  | 363 507.3158 1012.617 2 1012.617 0.0002 0 41.56 0.00033 K LVILEGELK R                     |
|    |        |                        |      |    |    |       |      |  | 411 522.2698 1042.665 2 1042.666 -0.0006 0 65.93 3.30E-05 K #AGLNSLEAVR K                 |
|    |        |                        |      |    |    |       |      |  | 446 546.7465 1091.479 2 1091.481 -0.0002 0 47.46 0.001 K C'G'DLEELK R                     |
|    |        |                        |      |    |    |       |      |  | 566 567.7988 1133.583 2 1133.582 0.0006 0 56.81 0.00036 K MEILEMQLK E                     |
|    |        |                        |      |    |    |       |      |  | 573 571.3627 1140.711 2 1140.712 -0.0009 1 59.55 1.30E-05 K KVILEGELK R                   |
|    |        |                        |      |    |    |       |      |  | 577 581.8072 1142.58 3 1142.579 0.0006 1 33.61 0.043 K AEGDAAALNR R                       |
|    |        |                        |      |    |    |       |      |  | 589 575.953 1149.572 2 1149.577 -0.0013 0 43.79 0.0086 K MEILEMQLK E                      |
|    |        |                        |      |    |    |       |      |  | 590 575.958 1149.577 2 1149.577 -0.0002 0 36.92 0.031 K M@EILEMQLK E                      |
|    |        |                        |      |    |    |       |      |  | 626 583.7925 1165.571 2 1165.572 -0.0017 0 42.11 0.0086 K M@EILEM@QLK E                   |
|    |        |                        |      |    |    |       |      |  | 634 585.3656 1168.717 2 1168.718 -0.0013 1 28.69 0.028 K LVILEGELK R                      |
|    |        |                        |      |    |    |       |      |  | 688 600.34 1198.666 2 1198.667 -0.0014 1 55.9 0.00029 M #AGLNSLEAVR K                     |
|    |        |                        |      |    |    |       |      |  | 689 600.3408 1198.667 2 1198.667 0 75.79 2.60E-06 M #AGLNSLEAVR K                         |
|    |        |                        |      |    |    |       |      |  |                                                                                           |

|  |  |  |  |  |  |  |  |  |      |          |          |   |          |         |   |        |          |   |                                     |   |
|--|--|--|--|--|--|--|--|--|------|----------|----------|---|----------|---------|---|--------|----------|---|-------------------------------------|---|
|  |  |  |  |  |  |  |  |  | 664  | 590.7986 | 1179.583 | 2 | 1179.585 | -0.0019 | 0 | 52.69  | 0.00076  | R | DGFDLMEK                            | L |
|  |  |  |  |  |  |  |  |  | 808  | 638.8337 | 1275.653 | 2 | 1275.656 | -0.0029 | 0 | 64.29  | 5.40E-05 | R | LSEIDVSTGVK                         | L |
|  |  |  |  |  |  |  |  |  | 1034 | 512.9101 | 1535.709 | 3 | 1535.71  | -0.0018 | 1 | 31.67  | 0.044    | R | FEEKAEDEER                          | K |
|  |  |  |  |  |  |  |  |  | 1035 | 768.8515 | 1535.709 | 2 | 1535.71  | -0.0019 | 1 | 31.96  | 0.041    | R | FEEKAEDEER                          | K |
|  |  |  |  |  |  |  |  |  | 1040 | 779.851  | 1557.847 | 2 | 1557.851 | -0.003  | 0 | 58.23  | 3.50E-05 | R | SMHVEDPDSK                          | K |
|  |  |  |  |  |  |  |  |  | 1045 | 784.8857 | 1567.757 | 2 | 1567.759 | -0.0021 | 0 | 71.14  | 7.50E-06 | R | ADLNQIGEPSPSR                       | R |
|  |  |  |  |  |  |  |  |  | 466  | 533.7791 | 1065.544 | 2 | 1065.546 | -0.0018 | 0 | 47.86  | 0.0028   | R | SAFVGLTR                            | V |
|  |  |  |  |  |  |  |  |  | 1021 | 752.8685 | 1503.722 | 2 | 1503.725 | -0.0022 | 0 | 46.17  | 0.0021   | K | AVLFTYDQYQEK                        | N |
|  |  |  |  |  |  |  |  |  | 259  | 459.2599 | 916.5052 | 2 | 916.5052 | 0       | 0 | 74.97  | 6.70E-06 | K | LGENMLK                             | R |
|  |  |  |  |  |  |  |  |  | 270  | 464.7765 | 927.5385 | 2 | 927.5389 | -0.0004 | 0 | 50.83  | 0.00073  | K | DLQALAIK                            | L |
|  |  |  |  |  |  |  |  |  | 281  | 467.257  | 932.4994 | 2 | 932.5001 | -0.0007 | 0 | 63.73  | 8.70E-05 | K | LGENM@ILK                           | R |
|  |  |  |  |  |  |  |  |  | 282  | 467.2571 | 932.4997 | 2 | 932.5001 | -0.0004 | 0 | 51.85  | 0.0013   | K | LGENM@ILK                           | R |
|  |  |  |  |  |  |  |  |  | 456  | 532.2576 | 1092.921 | 2 | 1092.92  | -0.001  | 0 | 46.87  | 0.002    | K | AULETCK                             | L |
|  |  |  |  |  |  |  |  |  | 476  | 538.2465 | 1074.479 | 2 | 1074.48  | -0.0019 | 0 | 47.65  | 0.0012   | K | TGYSFVNC*K                          | K |
|  |  |  |  |  |  |  |  |  | 813  | 721.9157 | 1441.817 | 2 | 1441.814 | -0.0029 | 1 | 87.36  | 1.10E-07 | R | EGSLKDLQALAIK                       | K |
|  |  |  |  |  |  |  |  |  | 830  | 756.7933 | 1511.572 | 2 | 1511.572 | -0.0001 | 0 | 45.81  | 0.00012  | R | FEC*GEOEIVAEAE                      | - |
|  |  |  |  |  |  |  |  |  | 893  | 581.9334 | 1761.852 | 1 | 1761.853 | -0.0011 | 0 | 86.35  | 1.90E-07 | R | GLNLSSELAAGPDR                      | - |
|  |  |  |  |  |  |  |  |  | 894  | 588.2916 | 1761.853 | 1 | 1761.853 | -0.0003 | 0 | 34.72  | 0.027    | K | GLNLSSELAAGPDR                      | E |
|  |  |  |  |  |  |  |  |  | 1107 | 1181.091 | 2360.168 | 2 | 2360.168 | -0.0006 | 0 | 105.44 | 1.40E-09 | K | YGALVIC*ETPEQIANLEEVR               | R |
|  |  |  |  |  |  |  |  |  | 1108 | 787.7299 | 2360.168 | 3 | 2360.168 | -0.0004 | 0 | 36.74  | 0.011    | K | YGALVIC*ETPEQIANLEEVR               | R |
|  |  |  |  |  |  |  |  |  | 1129 | 853.4244 | 2557.252 | 3 | 2557.253 | -0.0015 | 0 | 52.46  | 0.00028  | K | FOOLVQVQALGTMAHC*ONLDR              | L |
|  |  |  |  |  |  |  |  |  | 1131 | 844.3165 | 2573.245 | 2 | 2573.248 | -0.0026 | 0 | 28.87  | 2.30E-05 | K | FOOLVQVQALGTMAHC*ONLDR              | L |
|  |  |  |  |  |  |  |  |  | 1132 | 858.7563 | 2573.247 | 3 | 2573.248 | -0.0009 | 0 | 46.97  | 0.00079  | K | FOOLVQVQALGTMAHC*ONLDR              | L |
|  |  |  |  |  |  |  |  |  | 1150 | 917.7805 | 2750.32  | 3 | 2750.318 | -0.0014 | 0 | 82.3   | 2.60E-07 | R | LQGHVGM@PLVSGSLDDEPGETETR           | M |
|  |  |  |  |  |  |  |  |  | 1152 | 923.1112 | 2766.312 | 3 | 2766.313 | -0.0013 | 0 | 83.08  | 2.00E-07 | R | LQGHVGM@PLVSGSLDDEPGETETR           | M |
|  |  |  |  |  |  |  |  |  | 1154 | 945.1671 | 2832.475 | 2 | 2832.481 | -0.0017 | 0 | 55.9   | 6.00E-05 | K | VRGSLVYVHGTQPSLQNLVLQIK             | V |
|  |  |  |  |  |  |  |  |  | 1168 | 968.1653 | 2961.474 | 2 | 2961.475 | -0.0012 | 0 | 87.26  | 3.30E-08 | K | EGLQLDQENTAVLVCN*ETDVSFR            | N |
|  |  |  |  |  |  |  |  |  | 1227 | 1125.266 | 3372.776 | 3 | 3372.779 | -0.0031 | 0 | 52.73  | 5.70E-05 | R | MLQPYLLDPSLTLQVVPQGVTVDFVR          | F |
|  |  |  |  |  |  |  |  |  | 407  | 520.7564 | 1039.498 | 2 | 1039.501 | -0.0026 | 0 | 48.48  | 0.0015   | K | AYDATC*LVK                          | A |
|  |  |  |  |  |  |  |  |  | 643  | 587.8963 | 1171.692 | 2 | 1171.693 | -0.0006 | 0 | 44.49  | 0.0052   | K | VFEALVK                             | C |
|  |  |  |  |  |  |  |  |  | 764  | 635.8    | 1269.585 | 2 | 1269.588 | -0.0023 | 0 | 45.81  | 0.0024   | K | AFSGYLPDESK                         | W |
|  |  |  |  |  |  |  |  |  | 868  | 699.8478 | 1397.681 | 2 | 1397.683 | -0.0016 | 1 | 87.72  | 1.70E-07 | K | KAFSGYLPDESK                        | W |
|  |  |  |  |  |  |  |  |  | 872  | 703.8689 | 1405.723 | 2 | 1405.724 | -0.0009 | 0 | 35.26  | 0.034    | R | FAVYLPQAEASK                        | C |
|  |  |  |  |  |  |  |  |  | 873  | 703.8689 | 1405.723 | 2 | 1405.724 | -0.0008 | 0 | 44.95  | 0.0037   | R | FAVYLPQAEASK                        | C |
|  |  |  |  |  |  |  |  |  | 874  | 703.8693 | 1405.724 | 2 | 1405.724 | -0.0001 | 0 | 45.53  | 0.003    | R | FAVYLPQAEASK                        | C |
|  |  |  |  |  |  |  |  |  | 950  | 804.4168 | 1606.819 | 2 | 1606.82  | -0.0012 | 0 | 80.39  | 8.30E-07 | R | AYSQOIDLIDQK                        | D |
|  |  |  |  |  |  |  |  |  | 1075 | 662.9935 | 1985.959 | 3 | 1985.964 | -0.0005 | 0 | 35.57  | 0.017    | R | MSIFGSHMGHGALIC*ALK                 | N |
|  |  |  |  |  |  |  |  |  | 1079 | 996.9869 | 1991.959 | 2 | 1991.96  | -0.0004 | 0 | 52.12  | 0.00037  | R | SVSFAFPC*NPVLC*SWK                  | K |
|  |  |  |  |  |  |  |  |  | 1088 | 663.3259 | 2001.956 | 2 | 2001.959 | -0.0027 | 0 | 37.91  | 0.01     | R | MSIFGSHMGHGALIC*ALK                 | K |
|  |  |  |  |  |  |  |  |  | 1203 | 761.7151 | 2282.124 | 3 | 2282.129 | -0.0055 | 0 | 43.44  | 0.0028   | K | SGYQAAASEHGLVIAPTDPSR               | G |
|  |  |  |  |  |  |  |  |  | 1204 | 1142.071 | 2282.127 | 2 | 2282.129 | -0.0026 | 0 | 70.7   | 4.90E-06 | K | SGYQAAASEHGLVIAPTDPSR               | G |
|  |  |  |  |  |  |  |  |  | 1205 | 761.7164 | 2282.127 | 3 | 2282.129 | -0.0018 | 0 | 41.81  | 0.0039   | K | SGYQAAASEHGLVIAPTDPSR               | G |
|  |  |  |  |  |  |  |  |  | 1276 | 796.7167 | 2387.128 | 3 | 2387.129 | -0.0008 | 0 | 56.12  | 0.0002   | K | C*PALVWLSGLTC*TEQNFSK               | S |
|  |  |  |  |  |  |  |  |  | 1277 | 1194.571 | 2387.128 | 2 | 2387.129 | -0.0007 | 0 | 37.82  | 0.014    | R | C*PALVWLSGLTC*TEQNFSK               | S |
|  |  |  |  |  |  |  |  |  | 1310 | 853.7474 | 2558.221 | 3 | 2558.223 | -0.0025 | 0 | 38.52  | 0.007    | R | LOEGDYHSYFIATFIADHR                 | H |
|  |  |  |  |  |  |  |  |  | 1323 | 888.7092 | 2663.106 | 3 | 2663.109 | -0.0032 | 0 | 36.85  | 0.0019   | K | GEDDSVDFGTGAGFYVNAEDPKW             | A |
|  |  |  |  |  |  |  |  |  | 1333 | 914.1138 | 2739.32  | 3 | 2739.321 | -0.0019 | 0 | 33.35  | 0.021    | R | M@YSVTEELPQLNANFPVDPDR              | M |
|  |  |  |  |  |  |  |  |  | 1441 | 1022.245 | 3094.851 | 4 | 3094.858 | -0.0069 | 0 | 29.69  | 0.021    | K | AYSQOIDLIDQKDEKDFLSNGLLQPLDNFIACTEK | K |
|  |  |  |  |  |  |  |  |  | 1442 | 1362.659 | 4084.955 | 4 | 4084.958 | -0.0026 | 1 | 44.61  | 0.00059  | K | AYSQOIDLIDQKDEKDFLSNGLLQPLDNFIACTEK | K |
|  |  |  |  |  |  |  |  |  | 262  | 464.7399 | 927.4652 | 2 | 927.4661 | -0.0009 | 0 | 36.15  | 0.031    | K | VEGPEIR                             | W |
|  |  |  |  |  |  |  |  |  | 509  | 547.7769 | 1093.539 | 2 | 1093.54  | -0.0012 | 0 | 58.9   | 0.00019  | K | DTODILYAR                           | Q |
|  |  |  |  |  |  |  |  |  | 843  | 684.8295 | 1367.845 | 2 | 1367.846 | -0.0011 | 0 | 79.6   | 1.00E-06 | K | TLEDFDLGTTEK                        | D |
|  |  |  |  |  |  |  |  |  | 855  | 693.905  | 1385.787 | 2 | 1385.788 | -0.0011 | 0 | 56.72  | 0.001    | K | QANQVLTATSK                         | E |
|  |  |  |  |  |  |  |  |  | 877  | 709.8866 | 1417.759 | 2 | 1417.761 | -0.0019 | 0 | 53.94  | 0.00043  | K | IQWAEELIAFK                         | E |
|  |  |  |  |  |  |  |  |  | 990  | 870.9675 | 1739.921 | 2 | 1739.925 | -0.0041 | 0 | 93.86  | 2.40E-08 | K | AFGLQALDYLIDFR                      | D |
|  |  |  |  |  |  |  |  |  | 991  | 580.981  | 1739.921 | 2 | 1739.925 | -0.0038 | 0 | 31.77  | 0.026    | K | AFGLQALDYLIDFR                      | D |
|  |  |  |  |  |  |  |  |  | 992  | 703.8682 | 1739.922 | 2 | 1739.925 | -0.0028 | 0 | 44.03  | 0.0022   | K | AFGLQALDYLIDFR                      | D |
|  |  |  |  |  |  |  |  |  | 1007 | 897.3868 | 1792.759 | 2 | 1792.761 | -0.0018 | 0 | 72.44  | 1.90E-06 | K | VDC*AVLDC*EDGVAENK                  | K |
|  |  |  |  |  |  |  |  |  | 1134 | 717.0428 | 2148.107 | 3 | 2148.106 | -0.0003 | 0 | 35.44  | 0.013    | R | INSVSSGLAEVLEDTLQAR                 | V |
|  |  |  |  |  |  |  |  |  | 1281 | 801.7591 | 2402.256 | 3 | 2402.259 | -0.0004 | 0 | 41.16  | 0.00033  | K | IVQHPNQAIVQEOFTTPEK                 | I |
|  |  |  |  |  |  |  |  |  | 1282 | 802.4248 | 2404.253 | 3 | 2404.253 | -0.0008 | 0 | 53.85  | 0.00019  | K | LEOPM@NLPFVETAM@GLNFK               | A |
|  |  |  |  |  |  |  |  |  | 1286 | 807.7561 | 2402.247 | 2 | 2402.248 | -0.0019 | 0 | 62.87  | 0.00019  | K | LEOPM@NLPFVETAM@GLNFK               | A |
|  |  |  |  |  |  |  |  |  | 1291 | 813.0885 | 2436.244 | 3 | 2436.243 | -0.0004 | 0 | 42.25  | 0.0024   | K | LEOPM@NLPFVETAM@GLNFK               | A |
|  |  |  |  |  |  |  |  |  | 1308 | 847.1096 | 2538.307 | 3 | 2538.312 | -0.0048 | 1 | 52.61  | 0.00021  | K | AFGLQALDYLIDFRDEGDLR                | Q |
|  |  |  |  |  |  |  |  |  | 61   | 396.2366 | 790.4587 | 2 | 790.4589 | -0.0002 | 0 | 34.34  | 0.037    | K | SPHFSK                              | I |
|  |  |  |  |  |  |  |  |  | 452  | 522.802  | 1177.717 | 2 | 1177.718 | -0.0012 | 0 | 47.03  | 0.0028   | K | DTAIDRNLK                           | I |
|  |  |  |  |  |  |  |  |  | 654  | 589.865  | 1177.717 | 2 | 1177.718 | -0.0009 | 0 | 59.49  | 1.90E-05 | R | ALATQPLR                            | S |
|  |  |  |  |  |  |  |  |  | 1034 | 940.9612 | 1879.908 | 2 | 1879.91  | -0.0019 | 0 | 77.79  | 1.30E-06 | R | VNVEVQSSNTNMMVFK                    | T |
|  |  |  |  |  |  |  |  |  | 1035 | 948.9591 | 1895.904 | 2 | 1895.905 |         |   |        |          |   |                                     |   |



|  |  |  |  |  |  |  |  |      |          |          |   |          |         |   |        |          |   |                                |   |
|--|--|--|--|--|--|--|--|------|----------|----------|---|----------|---------|---|--------|----------|---|--------------------------------|---|
|  |  |  |  |  |  |  |  | 1128 | 683.0183 | 2046.033 | 3 | 2046.036 | -0.0034 | 0 | 43.47  | 0.0028   | R | YGSPYVPLNHLAYOK                | Q |
|  |  |  |  |  |  |  |  | 1131 | 683.0187 | 2046.034 | 3 | 2046.036 | -0.0019 | 0 | 35.81  | 0.016    | R | YGSPYVPLNHLAYOK                | Q |
|  |  |  |  |  |  |  |  | 1205 | 760.0179 | 2277.033 | 3 | 2277.037 | -0.0046 | 0 | 50.28  | 0.00035  | K | TLDVLEDVDC''C'DALSQR           | L |
|  |  |  |  |  |  |  |  | 1206 | 760.0185 | 2277.034 | 3 | 2277.037 | -0.0029 | 0 | 59.88  | 3.80E-05 | K | TLDVLEDVDC''C'DALSQR           | L |
|  |  |  |  |  |  |  |  | 1207 | 139.524  | 2277.034 | 2 | 2277.037 | -0.0025 | 0 | 117.76 | 5.90E-11 | K | TLDVLEDVDC''C'DALSQR           | L |
|  |  |  |  |  |  |  |  | 1270 | 602.3428 | 2405.342 | 4 | 2405.347 | -0.0052 | 0 | 33.61  | 0.0037   | K | VFFHVGNGVSELGPIGVFK            | A |
|  |  |  |  |  |  |  |  | 1272 | 802.7883 | 2405.343 | 3 | 2405.347 | -0.004  | 0 | 52.26  | 4.90E-05 | K | VFFHVGNGVSELGPIGVFK            | A |
|  |  |  |  |  |  |  |  | 1273 | 802.7885 | 2405.344 | 3 | 2405.347 | -0.0034 | 0 | 34.86  | 0.0025   | K | VFFHVGNGVSELGPIGVFK            | A |
|  |  |  |  |  |  |  |  | 1274 | 202.7898 | 2405.344 | 3 | 2405.347 | -0.0027 | 0 | 59.09  | 1.00E-05 | K | VFFHVGNGVSELGPIGVFK            | A |
|  |  |  |  |  |  |  |  | 1275 | 1203.68  | 2405.345 | 2 | 2405.347 | -0.0026 | 0 | 55.05  | 2.70E-05 | K | VFFHVGNGVSELGPIGVFK            | A |
|  |  |  |  |  |  |  |  | 1303 | 982.8381 | 2945.492 | 3 | 2945.499 | -0.0066 | 0 | 68.06  | 4.80E-06 | R | GEQILLSDNAASLVAQFLDM@C'NLQVVK  | V |
|  |  |  |  |  |  |  |  | 1301 | 1058.874 | 3173.6   | 3 | 3173.603 | -0.003  | 0 | 75.82  | 6.30E-07 | M | @SLVAEAFVQIAAEPWFENATLQYGLR    | G |
|  |  |  |  |  |  |  |  | 1328 | 1098.228 | 3261.662 | 3 | 3261.666 | -0.0041 | 0 | 42.19  | 0.0013   | K | OPTLEDLAFVGLYTLITLTTLDSELSK    | V |
|  |  |  |  |  |  |  |  | 730  | 614.3138 | 1226.614 | 2 | 1226.614 | -0.0016 | 0 | 49.49  | 0.0013   | V | EELGQAPDLK                     | V |
|  |  |  |  |  |  |  |  | 827  | 665.3804 | 1328.746 | 2 | 1328.749 | -0.0023 | 0 | 40.85  | 0.0053   | R | LLSPSGVM@LVSAR                 | S |
|  |  |  |  |  |  |  |  | 841  | 673.3776 | 1344.741 | 2 | 1344.744 | -0.0029 | 0 | 77     | 1.50E-06 | R | LLSPSGVM@LVSAR                 | S |
|  |  |  |  |  |  |  |  | 870  | 704.8213 | 1407.628 | 2 | 1407.63  | -0.0019 | 0 | 52.42  | 0.00035  | K | SGDALVDC''GTSACK               | L |
|  |  |  |  |  |  |  |  | 939  | 523.9568 | 1568.849 | 3 | 1568.852 | -0.0035 | 0 | 81.08  | 5.10E-07 | K | VVLAADLGTAGVQR                 | L |
|  |  |  |  |  |  |  |  | 940  | 785.4318 | 1568.849 | 2 | 1568.852 | -0.0031 | 0 | 103.78 | 2.80E-09 | K | VVLAADLGTAGVQR                 | L |
|  |  |  |  |  |  |  |  | 945  | 532.9565 | 1595.848 | 3 | 1595.852 | -0.004  | 1 | 31.62  | 0.045    | R | QLKEELGAQOPDLK                 | V |
|  |  |  |  |  |  |  |  | 946  | 798.9319 | 1595.849 | 2 | 1595.852 | -0.0028 | 1 | 57.76  | 9.70E-05 | R | QLKEELGAQOPDLK                 | V |
|  |  |  |  |  |  |  |  | 979  | 846.9512 | 1691.888 | 2 | 1691.892 | -0.0038 | 0 | 51.71  | 0.00048  | K | TVNISSL''ALOPYK                | V |
|  |  |  |  |  |  |  |  | 980  | 554.9701 | 1691.889 | 3 | 1691.892 | -0.0032 | 0 | 32.34  | 0.04     | K | TVNISSL''ALOPYK                | V |
|  |  |  |  |  |  |  |  | 996  | 868.9278 | 1735.841 | 2 | 1735.845 | -0.004  | 0 | 100.82 | 7.70E-09 | R | DM@LYQLAAEFPVSR                | V |
|  |  |  |  |  |  |  |  | 997  | 579.6213 | 1735.842 | 3 | 1735.845 | -0.0029 | 0 | 52.93  | 0.00045  | R | DM@LYQLAAEFPVSR                | V |
|  |  |  |  |  |  |  |  | 1063 | 933.9275 | 1865.84  | 2 | 1865.843 | -0.003  | 0 | 85     | 1.50E-07 | R | MEADGLG''AVC''VLTGSAR          | G |
|  |  |  |  |  |  |  |  | 1106 | 865.8654 | 2002.972 | 3 | 2002.978 | -0.0038 | 0 | 54.7   | 0.00025  | R | VLSYAPGLNDM@QQLAR              | E |
|  |  |  |  |  |  |  |  | 1109 | 1002.495 | 2002.975 | 2 | 2002.978 | -0.0029 | 0 | 36.54  | 0.015    | R | VLSYAPGLNDM@QQLAR              | E |
|  |  |  |  |  |  |  |  | 913  | 745.3892 | 1488.764 | 2 | 1488.765 | -0.0015 | 0 | 70.27  | 1.10E-05 | K | LFYQPTIYYPK                    | R |
|  |  |  |  |  |  |  |  | 914  | 745.3897 | 1488.765 | 2 | 1488.765 | -0.0004 | 0 | 62.47  | 6.00E-05 | K | LFYQPTIYYPK                    | R |
|  |  |  |  |  |  |  |  | 1039 | 607.6742 | 1820.001 | 3 | 1820.004 | -0.0036 | 0 | 35.91  | 0.0087   | K | GNPSGIPDILLISTAPK              | K |
|  |  |  |  |  |  |  |  | 1040 | 911.0078 | 1820.001 | 2 | 1820.004 | -0.0034 | 0 | 67.99  | 5.60E-06 | K | GNPSGIPDILLISTAPK              | K |
|  |  |  |  |  |  |  |  | 1041 | 911.0078 | 1820.001 | 2 | 1820.004 | -0.0034 | 0 | 68.27  | 5.00E-06 | K | GNPSGIPDILLISTAPK              | K |
|  |  |  |  |  |  |  |  | 1042 | 607.6746 | 1820.002 | 3 | 1820.004 | -0.0023 | 0 | 44.76  | 0.0011   | K | GNPSGIPDILLISTAPK              | K |
|  |  |  |  |  |  |  |  | 1068 | 629.6791 | 1886.015 | 3 | 1886.02  | -0.0042 | 0 | 46.64  | 0.00089  | K | RPNKPLFTGLTCC''OK              | M |
|  |  |  |  |  |  |  |  | 1069 | 472.5111 | 1886.016 | 4 | 1886.02  | -0.0042 | 0 | 38.43  | 0.0059   | K | RPNKPLFTGLTCC''OK              | M |
|  |  |  |  |  |  |  |  | 1070 | 629.6791 | 1886.016 | 3 | 1886.02  | -0.0041 | 0 | 54.26  | 0.00015  | K | RPNKPLFTGLTCC''OK              | M |
|  |  |  |  |  |  |  |  | 1112 | 1009.468 | 2016.921 | 2 | 2016.925 | -0.0045 | 0 | 64.59  | 1.80E-05 | R | YQLNPLSPYDTC''VVR              | L |
|  |  |  |  |  |  |  |  | 1114 | 1009.468 | 2016.921 | 2 | 2016.925 | -0.0041 | 0 | 48.57  | 0.00071  | K | YQLNPLSPYDTC''VVR              | L |
|  |  |  |  |  |  |  |  | 1233 | 1155.598 | 2309.123 | 2 | 2309.126 | -0.003  | 0 | 118.34 | 7.00E-11 | K | SPPTLVLC''GPNNGGDGLVC''AR      | H |
|  |  |  |  |  |  |  |  | 286  | 458.942  | 930.51   | 2 | 930.512  | -0.0017 | 0 | 53.61  | 0.0009   | K | EGVVEITGK                      | H |
|  |  |  |  |  |  |  |  | 287  | 466.2578 | 930.501  | 2 | 930.5022 | -0.0012 | 0 | 55.51  | 0.00059  | K | EGVVEITGK                      | H |
|  |  |  |  |  |  |  |  | 513  | 538.2894 | 1074.564 | 2 | 1074.567 | -0.0026 | 0 | 65.44  | 5.10E-05 | R | QLSSGVSEIR                     | Q |
|  |  |  |  |  |  |  |  | 615  | 575.3052 | 1148.596 | 2 | 1148.598 | -0.0019 | 0 | 57.86  | 0.00026  | R | LFDQAFVPR                      | L |
|  |  |  |  |  |  |  |  | 648  | 580.8284 | 1159.642 | 2 | 1159.645 | -0.0025 | 1 | 57.38  | 0.0002   | K | TREGVVEITGK                    | H |
|  |  |  |  |  |  |  |  | 1021 | 889.4713 | 1796.928 | 2 | 1796.931 | -0.0028 | 0 | 47.69  | 0.0011   | K | VSLDVFHFAPELTVK                | V |
|  |  |  |  |  |  |  |  | 1047 | 916.9897 | 1831.965 | 2 | 1831.968 | -0.0032 | 0 | 30.99  | 0.043    | K | AVTQSAEITPVTFEAR               | A |
|  |  |  |  |  |  |  |  | 1048 | 611.6622 | 1831.965 | 3 | 1831.968 | -0.0031 | 0 | 44.41  | 0.0019   | K | AVTQSAEITPVTFEAR               | A |
|  |  |  |  |  |  |  |  | 1049 | 916.9902 | 1831.966 | 2 | 1831.968 | -0.0022 | 0 | 60.1   | 4.90E-05 | K | AVTQSAEITPVTFEAR               | A |
|  |  |  |  |  |  |  |  | 107  | 1022.546 | 3064.619 | 3 | 3064.622 | -0.0061 | 0 | 55.26  | 5.10E-05 | K | YTLPPGVDPVTLVSSLSPEGLTVEAPLKP  | A |
|  |  |  |  |  |  |  |  | 1308 | 1022.547 | 3064.619 | 3 | 3064.622 | -0.0034 | 0 | 29.96  | 0.015    | K | YTLPPGVDPVTLVSSLSPEGLTVEAPLKP  | A |
|  |  |  |  |  |  |  |  | 1324 | 1065.243 | 3192.707 | 3 | 3192.717 | -0.0097 | 1 | 53.47  | 5.30E-05 | R | KYTLPPGVDPVTLVSSLSPEGLTVEAPLKP | A |
|  |  |  |  |  |  |  |  | 1325 | 1065.246 | 3192.712 | 3 | 3192.717 | -0.0049 | 1 | 47.57  | 0.00017  | R | KYTLPPGVDPVTLVSSLSPEGLTVEAPLKP | A |
|  |  |  |  |  |  |  |  | 602  | 592.8993 | 1136.564 | 2 | 1136.565 | -0.0007 | 0 | 42.5   | 0.0086   | K | IAVA@NCH''K                    | K |
|  |  |  |  |  |  |  |  | 761  | 624.3918 | 1246.589 | 2 | 1246.59  | -0.0017 | 0 | 56.36  | 0.0001   | R | SNWNGVADSTR                    | I |
|  |  |  |  |  |  |  |  | 825  | 663.8393 | 1325.662 | 2 | 1325.665 | -0.003  | 0 | 80.01  | 9.30E-07 | R | IVGSGVTGAT''K                  | I |
|  |  |  |  |  |  |  |  | 890  | 486.911  | 1457.715 | 2 | 1457.715 | -0.0039 | 0 | 34.14  | 0.036    | R | HVFGSEDELIGQK                  | V |
|  |  |  |  |  |  |  |  | 896  | 733.8649 | 1465.715 | 2 | 1465.716 | -0.0008 | 0 | 36.41  | 0.027    | K | TATPQAGEVHEK                   | L |
|  |  |  |  |  |  |  |  | 947  | 801.9469 | 1601.878 | 3 | 1601.882 | -0.0025 | 0 | 45.96  | 0.0013   | K | VVLAAYEPVWIASTGK               | V |
|  |  |  |  |  |  |  |  | 960  | 819.4122 | 1636.81  | 2 | 1636.813 | -0.0032 | 0 | 98.67  | 1.30E-08 | K | VTNGAFTGEISPGM@IK              | D |
|  |  |  |  |  |  |  |  | 968  | 698.8782 | 1395.742 | 2 | 1395.747 | -0.0051 | 0 | 62.69  | 3.90E-05 | R | ALGONPTQAEVLR                  | A |
|  |  |  |  |  |  |  |  | 1154 | 698.3753 | 2092.104 | 3 | 2092.107 | -0.0024 | 0 | 46.44  | 0.001    | K | AAPAPAAAPAAAPAAPEPERK          | F |
|  |  |  |  |  |  |  |  | 273  | 458.942  | 930.51   | 2 | 930.512  | -0.0017 | 0 | 39.37  | 0.027    | K | EGVVEITGK                      | C |
|  |  |  |  |  |  |  |  | 936  | 780.912  | 1559.81  | 2 | 1559.813 | -0.0034 | 0 | 68.03  | 1.60E-05 | K | YC''LVVUNPLDPR                 | F |
|  |  |  |  |  |  |  |  | 1090 | 650.2853 | 1947.834 | 3 | 1947.838 | -0.0041 | 0 | 48.58  | 0.00034  | R | AC''AGGANHLVDLTEGER            | E |
|  |  |  |  |  |  |  |  | 604  | 592.2632 | 1182.512 | 2 | 1182.513 | -0.0001 | 0 | 47.56  | 0.00099  | R | WTLGFC''DER                    | L |
|  |  |  |  |  |  |  |  | 605  | 592.2632 | 1182.512 | 2 | 1182.513 | -0.0009 | 0 | 35.55  | 0.016    | R | WTLGFC''DER                    | L |
|  |  |  |  |  |  |  |  | 666  | 626.3557 | 1250.697 | 2 | 1250.698 | -0.0015 | 0 | 58.54  | 9.10E-05 | K | EGTLPALVQPR                    | T |
|  |  |  |  |  |  |  |  | 667  | 626.3557 | 1250.697 | 2 | 1250.698 | -0.0015 | 0 | 44.49  | 0.0023   | K | EGTLPALVQPR                    | T |
|  |  |  |  |  |  |  |  | 668  | 626.3557 | 1250.697 | 2 | 1250.698 | -0.0015 | 0 | 49.28  | 0.00077  | K | EGTLPALVQPR                    | T |
|  |  |  |  |  |  |  |  | 690  | 626.3558 | 1250.697 | 2 | 1250.698 | -0.0012 | 0 | 39.55  | 0.0067   | K | EGTLPALVQPR                    | T |
|  |  |  |  |  |  |  |  | 766  | 741.8883 | 1481.762 | 2 | 1481.763 | -0.0006 | 0 | 93.37  | 4.40E-08 | R | DLPAAAAPAGPASFAR               | W |
|  |  |  |  |  |  |  |  | 767  | 741.889  | 1481.764 | 2 | 1481.763 | 0.0009  | 0 | 44.2   | 0.0033   | R | DLPAAAAPAGPASFAR               | W |
|  |  |  |  |  |  |  |  | 797  | 790.8795 | 1579.745 | 2 | 1579.745 | -0.0008 | 0 | 90.75  | 7.00E-08 | R | TGALC''WFLDEAAA                | L |
|  |  |  |  |  |  |  |  | 804  | 532.2917 | 1593.853 | 3 | 1593.855 | -0.0014 | 0 | 62.04  | 4.00E-05 | R | FALGSLGGSLVSM@LAR              | D |
|  |  |  |  |  |  |  |  | 805  | 532.2918 | 1593.854 | 3 | 1593.855 | -0.0013 | 0 | 60.86  | 5.30E-05 | R | FALGSLGGSLVSM@LAR              | D |
|  |  |  |  |  |  |  |  | 806  | 797.9343 | 1593.854 | 2 | 1593.855 | -0.0009 | 0 | 101.46 | 4.40E-09 | R | FALGSLGGSLVSM@LAR              | D |
|  |  |  |  |  |  |  |  | 807  | 797.9349 | 1593.855 | 2 | 1593.855 | -0.0003 | 0 | 91.74  | 3.80E-08 | R | FALGSLGGSLVSM@LAR              | D |
|  |  |  |  |  |  |  |  | 808  | 797.935  | 1593.855 | 2 | 1593.855 | 0.0006  | 0 | 55.84  | 0.00015  | R | FALGSLGGSLVSM@LAR              | D |
|  |  |  |  |  |  |  |  | 814  | 534.6378 | 1600.892 | 2 | 1600.894 | -0.0021 | 0 | 32.91  | 0.021    | K | IVAPISDPKPPQPR                 | V |
|  |  |  |  |  |  |  |  | 816  | 534.6379 | 1600.892 | 2 | 1600.894 | -0.0017 |   |        |          |   |                                |   |

|       |            |                                      |     |    |       |       |      |          |          |          |         |          |         |            |                              |              |                                    |   |
|-------|------------|--------------------------------------|-----|----|-------|-------|------|----------|----------|----------|---------|----------|---------|------------|------------------------------|--------------|------------------------------------|---|
| P6778 | Prohibitin | 179                                  | 7   | 6  | 29802 | 5.57  | 1318 | 1010.533 | 3028.577 | 3028.576 | 0.001   | 0        | 29.74   | 0.025 K    | ELASQPDVDFGLVGGASLKPFEVDINAK | Q            |                                    |   |
|       |            |                                      |     |    |       |       | 447  | 531.7561 | 1061.498 | 1061.499 | -0.0013 | 0        | 36.11   | 0.029 R    | QVSDLLTER                    | A            |                                    |   |
|       |            |                                      |     |    |       |       | 574  | 575.2981 | 1148.582 | 1148.583 | -0.0009 | 0        | 76.42   | 3.50E-06 R | FDAGELWTLR                   | E            |                                    |   |
|       |            |                                      |     |    |       |       | 651  | 593.333  | 1184.652 | 1184.651 | 0.0001  | 0        | 56.58   | 0.0023 K   | DLQNVNLTOR                   | E            |                                    |   |
|       |            |                                      |     |    |       |       | 871  | 800.8001 | 1459.646 | 1459.647 | -0.0001 | 0        | 41.91   | 0.0031 R   | IVTSYEDYR                    | V            |                                    |   |
|       |            |                                      |     |    |       |       | 1129 | 707.0527 | 2118.136 | 2118.136 | 0.0003  | 0        | 40.65   | 0.0026 R   | AATFGLDDVSLHITLFGK           | E            |                                    |   |
|       |            |                                      |     |    |       |       | 1268 | 593.5685 | 2370.245 | 2370.244 | 0.0006  | 0        | 44.27   | 0.0012 K   | FGLALAVAGGVNSALYVNDAGHR      | A            |                                    |   |
|       |            |                                      |     |    |       |       | 1269 | 791.0893 | 2370.246 | 2370.244 | 0.0016  | 0        | 36.51   | 0.0073 K   | FGLALAVAGGVNSALYVNDAGHR      | A            |                                    |   |
|       |            |                                      |     |    |       |       | 358  | 1.2125   | 1020.602 | 1020.564 | -0.0021 | 0        | 46.22   | 0.0031 R   | A VYRFDK                     | A            |                                    |   |
|       |            |                                      |     |    |       |       | 437  | 529.2994 | 1056.584 | 1056.586 | -0.0013 | 0        | 45.03   | 0.0046 K   | IFPFDIDK                     | N            |                                    |   |
|       |            |                                      |     |    |       |       | 838  | 698.3326 | 1394.651 | 1394.65  | 0.0006  | 0        | 44.78   | 0.0027 R   | DFTFVCTTELGR                 | A            |                                    |   |
| 62    | Q8K3J1     | NADH dehydrogenase [ubiquinone] iron | 663 | 20 | 9     | 24023 | 5.89 | 201      | 451.2017 | 900.3889 | -0.0001 | 0        | 31.04   | 0.035 R    | YDIDM@TK                     | C            |                                    |   |
|       |            |                                      |     |    |       |       |      | 202      | 201.2918 | 900.981  | -0.0007 | 0        | 31.76   | 0.037 K    | YDIDM@TK                     | C            |                                    |   |
|       |            |                                      |     |    |       |       |      | 559      | 587.8362 | 1173.658 | 2       | 1173.658 | -0.0002 | 0          | 53.74                        | 0.00042 R    | ILM@WTELIR                         | G |
|       |            |                                      |     |    |       |       |      | 588      | 595.8336 | 1189.653 | 2       | 1189.653 | -0.0002 | 0          | 67.93                        | 1.70E-05 R   | ILM@WTELIR                         | G |
|       |            |                                      |     |    |       |       |      | 589      | 595.8342 | 1189.654 | 2       | 1189.653 | 0.0009  | 0          | 61.61                        | 6.90E-05 R   | ILM@WTELIR                         | G |
|       |            |                                      |     |    |       |       |      | 677      | 639.377  | 1256.661 | 2       | 1256.659 | 0.0021  | 0          | 61.93                        | 6.80E-05 R   | GLGM@TSLYFTR                       | E |
|       |            |                                      |     |    |       |       |      | 697      | 637.3339 | 1272.653 | 2       | 1272.654 | -0.0003 | 0          | 67.76                        | 2.00E-05 R   | GLGM@TSLYFTR                       | E |
|       |            |                                      |     |    |       |       |      | 698      | 637.3341 | 1272.654 | 2       | 1272.654 | 0       | 80.16      | 1.10E-06 R                   | GLGM@TSLYFTR | E                                  |   |
|       |            |                                      |     |    |       |       |      | 699      | 637.3343 | 1272.654 | 2       | 1272.654 | 0.0004  | 0          | 61.29                        | 8.40E-05 R   | GLGM@TSLYFTR                       | E |
|       |            |                                      |     |    |       |       |      | 701      | 637.3345 | 1272.655 | 2       | 1272.654 | 0.0009  | 0          | 49.37                        | 0.0013 R     | GLGM@TSLYFTR                       | E |
|       |            |                                      |     |    |       |       |      | 702      | 637.3346 | 1272.655 | 2       | 1272.654 | 0.001   | 0          | 57.18                        | 0.00022 R    | GLGM@TSLYFTR                       | E |
|       |            |                                      |     |    |       |       |      | 704      | 637.335  | 1272.656 | 2       | 1272.654 | 0.0019  | 0          | 44.45                        | 0.0043 R     | GLGM@TSLYFTR                       | E |
|       |            |                                      |     |    |       |       |      | 741      | 654.8265 | 1307.639 | 2       | 1307.64  | -0.0012 | 0          | 39.79                        | 0.014 R      | EPATINYPFEK                        | G |
|       |            |                                      |     |    |       |       |      | 743      | 654.8273 | 1307.64  | 2       | 1307.64  | 0.0002  | 0          | 41.02                        | 0.0095 R     | EPATINYPFEK                        | G |
|       |            |                                      |     |    |       |       |      | 744      | 654.8276 | 1307.641 | 2       | 1307.64  | 0.001   | 0          | 37.4                         | 0.022 R      | EPATINYPFEK                        | G |
|       |            |                                      |     |    |       |       |      | 985      | 1021.506 | 2040.997 | 2       | 2040.997 | -0.0003 | 0          | 72.06                        | 4.00E-06 R   | LC'EAC'PAQAITIEAEP                 | A |
|       |            |                                      |     |    |       |       |      | 986      | 1021.506 | 2040.998 | 2       | 2040.997 | 0.0008  | 0          | 89.66                        | 6.70E-08 K   | LC'EAC'PAQAITIEAEP                 | A |
|       |            |                                      |     |    |       |       |      | 1213     | 855.1011 | 2562.282 | 3       | 2562.283 | -0.0012 | 1          | 40.84                        | 0.0033 R     | GLGM@TSLYFREPATINYPFEK             | G |
|       |            |                                      |     |    |       |       |      | 1222     | 670.8398 | 2679.33  | 4       | 2679.329 | 0.0008  | 1          | 39.77                        | 0.0042 K     | LLNNGDKWAEIAANIGADLYLR             | - |
|       |            |                                      |     |    |       |       |      | 1223     | 894.1177 | 2679.331 | 4       | 2679.329 | 0.0002  | 1          | 43.41                        | 3.70E-05 R   | LLNNGDKWAEIAANIGADLYLR             | - |
|       |            |                                      |     |    |       |       |      | 91       | 419.2129 | 836.4113 | 3       | 836.4102 | 0.0011  | 0          | 43.41                        | 0.0045 K     | LDFFPAM@K                          | F |
|       |            |                                      |     |    |       |       |      | 278      | 489.274  | 976.5334 | 2       | 976.5342 | -0.0007 | 1          | 42.03                        | 0.009 K      | RFEELGVK                           | F |
|       |            |                                      |     |    |       |       |      | 280      | 489.2742 | 976.5338 | 2       | 976.5342 | -0.0003 | 1          | 48.61                        | 0.002 K      | RFEELGVK                           | F |
|       |            |                                      |     |    |       |       |      | 289      | 482.8256 | 983.6367 | 2       | 983.6379 | -0.0012 | 1          | 41.19                        | 0.0011 R     | VLGLTLQK                           | L |
|       |            |                                      |     |    |       |       |      | 290      | 482.8259 | 983.6373 | 2       | 983.6379 | 0.0006  | 0          | 76.21                        | 3.90E-07 K   | VLGLTLQK                           | L |
|       |            |                                      |     |    |       |       |      | 291      | 482.826  | 983.6374 | 2       | 983.6379 | -0.0005 | 0          | 67.4                         | 2.50E-06 R   | VLGLTLQK                           | L |
|       |            |                                      |     |    |       |       |      | 292      | 482.8262 | 983.6379 | 2       | 983.6379 | 0       | 24.72      | 0.047 R                      | VLGLTLQK     | L                                  |   |
|       |            |                                      |     |    |       |       |      | 685      | 632.8397 | 1263.665 | 2       | 1263.665 | 0.0002  | 0          | 58.7                         | 0.00016 K    | DFLQO@TLR                          | I |
|       |            |                                      |     |    |       |       |      | 709      | 640.8369 | 1279.659 | 2       | 1279.656 | -0.0002 | 0          | 55.94                        | 0.00032 R    | DFLQO@TLR                          | I |
|       |            |                                      |     |    |       |       |      | 710      | 640.8369 | 1279.659 | 2       | 1279.656 | -0.0002 | 0          | 56.92                        | 0.00025 K    | DFLQO@TLR                          | I |
|       |            |                                      |     |    |       |       |      | 711      | 640.8373 | 1279.66  | 2       | 1279.66  | 0.0007  | 0          | 57.92                        | 0.00019 K    | DFLQO@TLR                          | I |
|       |            |                                      |     |    |       |       |      | 788      | 698.3449 | 1394.675 | 2       | 1394.676 | -0.0005 | 0          | 50.83                        | 0.00082 K    | FSLYFLAYEDK                        | N |
|       |            |                                      |     |    |       |       |      | 789      | 698.3459 | 1394.677 | 2       | 1394.676 | 0.0014  | 0          | 67.89                        | 1.80E-05 K   | FSLYFLAYEDK                        | N |
|       |            |                                      |     |    |       |       |      | 897      | 597.6348 | 1789.883 | 2       | 1789.882 | 0.0003  | 0          | 40.84                        | 0.0067 R     | GFHGHIWVPGYPSYACK                  | R |
|       |            |                                      |     |    |       |       |      | 964      | 981.9965 | 1961.978 | 2       | 1961.977 | 0.0009  | 1          | 32.68                        | 0.036 K      | FSLYFLAYEDKNDIPK                   | D |
|       |            |                                      |     |    |       |       |      | 1126     | 1152.088 | 2302.162 | 2       | 2302.163 | -0.0012 | 0          | 83.73                        | 2.00E-07 K   | GLAFIDPPDGYWIELNPNK                | I |
|       |            |                                      |     |    |       |       |      | 1128     | 1152.09  | 2302.165 | 2       | 2302.163 | 0.0013  | 0          | 97.11                        | 9.10E-09 K   | GLAFIDPPDGYWIELNPNK                | I |
|       |            |                                      |     |    |       |       |      | 1235     | 985.4061 | 2896.203 | 2       | 2896.202 | 0.0011  | 0          | 58.25                        | 1.10E-05 M   | #AEP@PSSGLD@T@F@S@C@S@D@P@S@T@K    | D |
|       |            |                                      |     |    |       |       |      | 1297     | 1386.958 | 4157.851 | 3       | 4157.85  | 0.0003  | 1          | 52.11                        | 6.20E-05 M   | #AEP@PSSGLD@T@F@S@C@S@D@P@S@T@K    | D |
|       |            |                                      |     |    |       |       |      | 322      | 501.7736 | 1001.533 | 2       | 1001.533 | -0.0002 | 0          | 54.92                        | 0.00066 K    | GQIM@DAVR                          | E |
|       |            |                                      |     |    |       |       |      | 338      | 509.7705 | 1017.527 | 2       | 1017.528 | -0.0012 | 0          | 43.32                        | 0.01 K       | GQIM@DAVR                          | E |
|       |            |                                      |     |    |       |       |      | 339      | 509.7707 | 1017.527 | 2       | 1017.528 | -0.0009 | 0          | 57.13                        | 0.00042 K    | GQIM@DAVR                          | E |
|       |            |                                      |     |    |       |       |      | 907      | 638.8298 | 1275.643 | 2       | 1275.646 | -0.0002 | 0          | 35.93                        | 0.043 K      | AVYGGPSSP@K                        | K |
|       |            |                                      |     |    |       |       |      | 905      | 902.9786 | 1803.943 | 2       | 1803.944 | -0.0013 | 0          | 66.57                        | 1.50E-05 R   | YLPD@TLLEEC@GLLR                   | K |
|       |            |                                      |     |    |       |       |      | 906      | 602.3221 | 1803.945 | 3       | 1803.944 | 0.0006  | 0          | 48.89                        | 0.00079 R    | YLPD@TLLEEC@GLLR                   | K |
|       |            |                                      |     |    |       |       |      | 907      | 902.9796 | 1803.945 | 2       | 1803.944 | 0.0006  | 0          | 84.72                        | 2.10E-07 R   | YLPD@TLLEEC@GLLR                   | K |
|       |            |                                      |     |    |       |       |      | 1024     | 731.3035 | 2180.889 | 2       | 2180.887 | 0.0012  | 0          | 48.74                        | 9.10E-05 R   | GSSSFE@C@H@S@S@Y@E@M@K             | K |
|       |            |                                      |     |    |       |       |      | 1125     | 768.3876 | 2302.141 | 3       | 2302.142 | -0.0005 | 0          | 42.39                        | 0.0031 R     | EYR@S@L@V@E@G@Y@S@Y@A@R            | M |
|       |            |                                      |     |    |       |       |      | 1157     | 1165.643 | 2329.271 | 2       | 2329.268 | 0.0026  | 0          | 100.24                       | 1.50E-09 R   | GTVLLADNVVPGTDFLAVYR               | G |
|       |            |                                      |     |    |       |       |      | 1241     | 985.8207 | 2954.44  | 3       | 2954.441 | -0.0001 | 0          | 53.78                        | 4.70E-06 R   | LLTMEINP@Y@A@T@Q@M@L@D@F@A@G@L@Q@K | V |
|       |            |                                      |     |    |       |       |      | 1242     | 985.8211 | 2954.442 | 3       | 2954.441 | 0.0012  | 0          | 70.1                         | 3.00E-06 R   | LLTMEINP@Y@A@T@Q@M@L@D@F@A@G@L@Q@K | V |
|       |            |                                      |     |    |       |       |      | 1243     | 891.152  | 2970.434 | 2       | 2970.435 | -0.0012 | 0          | 74.81                        | 1.10E-06 R   | LLTMEINP@Y@A@T@Q@M@L@D@F@A@G@L@Q@K | V |
|       |            |                                      |     |    |       |       |      | 506      | 565.8322 | 1129.65  | 2       | 1129.65  | 0.0003  | 0          | 73.18                        | 3.80E-06 K   | IFVYGGPSSGK                        | A |
|       |            |                                      |     |    |       |       |      | 825      | 499.2561 | 1494.747 | 3       | 1494.747 | -0.0001 | 0          | 53.7                         | 0.00041 K    | YGYTHLSTGDLR                       | A |
|       |            |                                      |     |    |       |       |      | 831      | 770.3757 | 1538.737 | 2       | 1538.737 | 0.0003  | 0          | 65.46                        | 2.80E-05 K   | VDSSNGFLIDYPR                      | E |
|       |            |                                      |     |    |       |       |      | 838      | 793.8263 | 1585.839 | 2       | 1585.839 | -0.0004 | 0          | 41.83                        | 0.0052 K     | GELVPLD@LDM@LR                     | D |
|       |            |                                      |     |    |       |       |      | 840      | 529.62   | 1585.838 | 3       | 1585.839 | -0.0004 | 0          | 38.79                        | 0.011 K      | GELVPLD@LDM@LR                     | D |
|       |            |                                      |     |    |       |       |      | 841      | 793.8278 | 1585.841 | 2       | 1585.839 | 0.0025  | 0          | 42.93                        | 0.0042 K     | GELVPLD@LDM@LR                     | D |
|       |            |                                      |     |    |       |       |      | 995      | 1026.993 | 2051.972 | 2       | 2051.973 | -0.0007 | 0          | 107.2                        | 1.30E-09 R   | LETY@N@T@P@V@S@F@Y@D@K             | R |
|       |            |                                      |     |    |       |       |      | 1026     | 1097.084 | 2192.114 | 2       | 2192.115 | -0.0006 | 0          | 86.05                        | 1.60E-07 R   | IGQP@TLL@Y@D@A@E@T@M@TOR           | L |
|       |            |                                      |     |    |       |       |      | 1027     | 731.7125 | 2192.114 | 2       | 2192.115 | 0.0008  | 0          | 57.48                        | 0.00011 K    | IGQP@TLL@Y@D@A@E@T@M@TOR           | L |
|       |            |                                      |     |    |       |       |      | 622      | 606.3407 | 1210.667 | 2       | 1210.667 | -0.0001 | 0          | 43.29                        | 0.0037 R     | QIT@N@L@P@V@GR                     | S |
| 63    |            |                                      |     |    |       |       |      |          |          |          |         |          |         |            |                              |              |                                    |   |

|  |    |  |  |  |  |  |  |  |               |          |   |          |         |   |       |          |                          |   |  |
|--|----|--|--|--|--|--|--|--|---------------|----------|---|----------|---------|---|-------|----------|--------------------------|---|--|
|  |    |  |  |  |  |  |  |  | 970 834.9887  | 1667.963 | 2 | 1667.961 | 0.0018  | 0 | 64.68 | 6.30E-06 | AVQOPDGLVAVLGIK          | I |  |
|  |    |  |  |  |  |  |  |  | 1258 628.5505 | 2510.173 | 4 | 2510.173 | 0.0003  | 0 | 30.76 | 0.035    | LIQFHFWGSSDGGSEHTVNK     | K |  |
|  |    |  |  |  |  |  |  |  | 1259 850.4016 | 2548.183 | 3 | 2548.183 | 0       | 0 | 74.61 | 1.30E-06 | SIVNNGHSFNVEFDSQDNVALK   | V |  |
|  |    |  |  |  |  |  |  |  | 1265 883.5102 | 2647.509 | 3 | 2647.506 | 0.0026  | 1 | 44.91 | 0.00018  | AVQOPDGLVAVLGIKIPASQGLK  | G |  |
|  |    |  |  |  |  |  |  |  | 1280 502      | 2835.429 | 3 | 2835.429 | -0.0003 | 0 | 50.74 | 0.00028  | QSPVDITATQHPDLPPLLSYDK   | A |  |
|  |    |  |  |  |  |  |  |  | 1281 964.1168 | 2889.329 | 3 | 2889.324 | 0.0047  | 0 | 67.02 | 5.90E-06 | TUNFNEEGDAEAM@DVNWRPAQPK | N |  |
|  |    |  |  |  |  |  |  |  | 396 512.253   | 1022.491 | 2 | 1022.492 | -0.0006 | 0 | 42.62 | 0.0072   | EFTAEVAK                 | Q |  |
|  |    |  |  |  |  |  |  |  | 593 575.2988  | 1148.583 | 2 | 1148.583 | 0.0005  | 0 | 63.83 | 6.20E-05 | FDAGELTQR                | I |  |
|  |    |  |  |  |  |  |  |  | 545 593.3328  | 1194.651 | 1 | 1194.651 | -0.0003 | 0 | 47.16 | 0.021    | DLONNTLR                 | E |  |
|  |    |  |  |  |  |  |  |  | 826 466.2854  | 1395.834 | 3 | 1395.835 | -0.0007 | 0 | 41.46 | 0.00095  | ILFRPVASQLPR             | I |  |
|  |    |  |  |  |  |  |  |  | 863 730.8304  | 1459.646 | 2 | 1459.647 | -0.0003 | 0 | 62.94 | 2.40E-05 | ITYSIEDYDER              | V |  |
|  |    |  |  |  |  |  |  |  | 1091 666.7003 | 1997.079 | 3 | 1997.079 | -0.0001 | 0 | 36.98 | 0.0063   | AAELIANSLATAGDGLIELR     | K |  |
|  |    |  |  |  |  |  |  |  | 1124 707.0529 | 2118.137 | 3 | 2118.136 | 0.0008  | 0 | 48.3  | 0.00044  | AATFGLLDVSLHTLTFGK       | E |  |
|  |    |  |  |  |  |  |  |  | 1246 593.6997 | 2370.25  | 2 | 2370.244 | 0.0005  | 0 | 62.34 | 1.93E-05 | FGLLAVAGVGNVSNLYNDAGHR   | G |  |
|  |    |  |  |  |  |  |  |  | 991 768.4089  | 1534.803 | 2 | 1534.803 | 0.0008  | 0 | 97.91 | 1.30E-08 | IASSAVM@GSLTIETFR        | A |  |
|  |    |  |  |  |  |  |  |  | 545 820.8821  | 1639.75  | 2 | 1639.751 | -0.0015 | 0 | 37.37 | 0.011    | EQM@SDVEGTFVQR           | L |  |
|  |    |  |  |  |  |  |  |  | 1010 592.0242 | 1773.051 | 3 | 1773.051 | -0.0005 | 0 | 55.83 | 1.10E-05 | ALALAQELPOAPVAVR         | L |  |
|  |    |  |  |  |  |  |  |  | 1011 857.5333 | 1773.052 | 1 | 1773.051 | 0.0009  | 0 | 57.58 | 6.60E-06 | ALALAQELPOAPVAVR         | L |  |
|  |    |  |  |  |  |  |  |  | 621 581.7792  | 1161.544 | 2 | 1161.545 | -0.001  | 0 | 43.3  | 0.0065   | NIDALSGMEGR              | K |  |
|  |    |  |  |  |  |  |  |  | 638 589.7764  | 1177.538 | 2 | 1177.54  | -0.0015 | 0 | 51.49 | 0.00079  | NIDALSGM@EGR             | K |  |
|  |    |  |  |  |  |  |  |  | 726 623.3374  | 1244.66  | 2 | 1244.661 | -0.001  | 0 | 74.5  | 4.60E-06 | NITEIADLTOK              | K |  |
|  |    |  |  |  |  |  |  |  | 881 755.3729  | 1508.732 | 2 | 1508.733 | -0.0014 | 0 | 46.94 | 0.0022   | ISADAMM@QALLGTR          | A |  |
|  |    |  |  |  |  |  |  |  | 892 755.3746  | 1508.732 | 2 | 1508.733 | 0.0003  | 0 | 38.19 | 0.015    | ISADAMM@QALLGTR          | A |  |
|  |    |  |  |  |  |  |  |  | 1067 953.9414 | 1905.868 | 2 | 1905.87  | -0.0022 | 0 | 48.87 | 0.00064  | #ADESSDAAGFOPAPAPVPR     | R |  |
|  |    |  |  |  |  |  |  |  | 132 420.787   | 839.5594 | 2 | 839.5593 | 0.0001  | 0 | 35.06 | 0.003    | IVVLLQR                  | A |  |
|  |    |  |  |  |  |  |  |  | 825 698.3981  | 1394.782 | 2 | 1394.781 | 0.0008  | 0 | 70.94 | 2.90E-06 | NAYAVLVDLIK              | N |  |
|  |    |  |  |  |  |  |  |  | 846 686.8724  | 1411.73  | 1 | 1411.731 | -0.0003 | 0 | 53.94 | 0.0042   | EPFAP@NLNSLK             | A |  |
|  |    |  |  |  |  |  |  |  | 884 760.3723  | 1518.73  | 2 | 1518.731 | -0.0015 | 0 | 51.97 | 0.00064  | IEDGNFNGVAVQEK           | V |  |
|  |    |  |  |  |  |  |  |  | 1061 624.6428 | 1870.907 | 3 | 1870.906 | 0.0004  | 0 | 33.65 | 0.033    | QLVHELDEAYEQEIR          | L |  |
|  |    |  |  |  |  |  |  |  | 570 565.7811  | 1129.548 | 2 | 1129.548 | -0.0001 | 0 | 41.47 | 0.0076   | VFOVEYAM@K               | A |  |
|  |    |  |  |  |  |  |  |  | 695 609.3275  | 1216.64  | 2 | 1216.641 | -0.0008 | 0 | 87.12 | 2.90E-07 | AVENSSTAIGR              | C |  |
|  |    |  |  |  |  |  |  |  | 391 510.7687  | 1198.61  | 2 | 1198.61  | 0.0002  | 0 | 62.04 | 0.0154   | LEDLTLGLLR               | R |  |
|  |    |  |  |  |  |  |  |  | 673 600.3527  | 1198.691 | 2 | 1198.692 | -0.0013 | 0 | 54.01 | 0.00025  | GIYLLYGR                 | G |  |
|  |    |  |  |  |  |  |  |  | 496 542.2951  | 1082.576 | 2 | 1082.576 | -0.0004 | 0 | 46.42 | 0.0023   | GIYLLYGR                 | G |  |
|  |    |  |  |  |  |  |  |  | 839 478.2328  | 1431.692 | 3 | 1431.693 | -0.0006 | 0 | 44.84 | 0.0031   | FIQ@DASSLHVQR            | K |  |
|  |    |  |  |  |  |  |  |  |               |          |   |          |         |   |       |          |                          |   |  |
|  |    |  |  |  |  |  |  |  | 271 476.2297  | 950.4449 | 2 | 950.4458 | -0.0008 | 0 | 37.21 | 0.026    | GGPLSDSYR                | L |  |
|  |    |  |  |  |  |  |  |  | 273 476.2298  | 950.445  | 2 | 950.4458 | -0.0007 | 0 | 53.9  | 0.00055  | GGPLSDSYR                | L |  |
|  |    |  |  |  |  |  |  |  | 335 498.7843  | 997.554  | 2 | 997.5556 | -0.0016 | 0 | 53.47 | 0.00036  | IGPASQGLK                | V |  |
|  |    |  |  |  |  |  |  |  | 336 498.7843  | 997.554  | 2 | 997.5556 | -0.0016 | 0 | 72.98 | 4.10E-06 | IGPASQGLK                | V |  |
|  |    |  |  |  |  |  |  |  | 337 498.7844  | 997.5542 | 2 | 997.5556 | -0.0015 | 0 | 53.78 | 0.00034  | IGPASQGLK                | V |  |
|  |    |  |  |  |  |  |  |  | 338 498.7844  | 997.5542 | 2 | 997.5556 | -0.0014 | 0 | 40.48 | 0.0072   | IGPASQGLK                | V |  |
|  |    |  |  |  |  |  |  |  | 339 498.7845  | 997.5544 | 2 | 997.5556 | -0.0012 | 0 | 35.14 | 0.023    | IGPASQGLK                | V |  |
|  |    |  |  |  |  |  |  |  | 352 502.7427  | 1003.471 | 2 | 1003.472 | -0.0014 | 0 | 43.9  | 0.0043   | DFPIANGDR                | Q |  |
|  |    |  |  |  |  |  |  |  | 361 505.3049  | 1008.595 | 2 | 1008.597 | -0.0015 | 0 | 45.17 | 0.0013   | VLEALHSIK                | I |  |
|  |    |  |  |  |  |  |  |  | 362 505.3053  | 1008.596 | 2 | 1008.597 | -0.0015 | 0 | 38.34 | 0.0062   | VLEALHSIK                | I |  |
|  |    |  |  |  |  |  |  |  | 429 522.2375  | 1042.46  | 2 | 1042.462 | -0.0016 | 0 | 32.05 | 0.04     | #SHHWGYSK                | H |  |
|  |    |  |  |  |  |  |  |  | 821 527.9436  | 1580.809 | 3 | 1580.81  | -0.001  | 0 | 39.95 | 0.0074   | YAAELHLHWNTK             | K |  |
|  |    |  |  |  |  |  |  |  | 822 527.9437  | 1580.809 | 3 | 1580.81  | -0.0006 | 0 | 33.44 | 0.033    | YAAELHLHWNTK             | Y |  |
|  |    |  |  |  |  |  |  |  | 827 527.9438  | 1580.81  | 1 | 1580.81  | -0.0002 | 0 | 33.66 | 0.031    | YAAELHLHWNTK             | Y |  |
|  |    |  |  |  |  |  |  |  | 828 791.4122  | 1580.81  | 2 | 1580.81  | -0.0002 | 0 | 63.87 | 2.90E-05 | YAAELHLHWNTK             | Y |  |
|  |    |  |  |  |  |  |  |  | 904 549.9313  | 1646.772 | 3 | 1646.772 | -0.0003 | 0 | 36.36 | 0.019    | EPITYSSEOMSHFR           | T |  |
|  |    |  |  |  |  |  |  |  | 905 824.3934  | 1646.772 | 2 | 1646.772 | 0.0001  | 0 | 65.98 | 2.20E-05 | EPITYSSEOMSHFR           | T |  |
|  |    |  |  |  |  |  |  |  | 924 832.3893  | 1662.764 | 2 | 1662.767 | -0.0032 | 0 | 67.7  | 1.30E-05 | EPITYSSEOMSHFR           | T |  |
|  |    |  |  |  |  |  |  |  | 925 832.3894  | 1662.765 | 2 | 1662.767 | -0.0018 | 0 | 41.39 | 0.0054   | EPITYSSEOMSHFR           | T |  |
|  |    |  |  |  |  |  |  |  | 934 834.9874  | 1667.96  | 2 | 1667.961 | -0.0009 | 0 | 50.05 | 0.00017  | AVQOPDGLVAVLGIK          | I |  |
|  |    |  |  |  |  |  |  |  | 935 556.9943  | 1667.961 | 3 | 1667.961 | -0.0001 | 0 | 64.49 | 6.40E-06 | AVQOPDGLVAVLGIK          | I |  |
|  |    |  |  |  |  |  |  |  | 936 834.9879  | 1667.961 | 2 | 1667.961 | 0.0001  | 0 | 68.7  | 2.40E-06 | AVQOPDGLVAVLGIK          | I |  |
|  |    |  |  |  |  |  |  |  | 937 834.9879  | 1667.961 | 2 | 1667.961 | 0.0002  | 0 | 31.68 | 0.011    | AVQOPDGLVAVLGIK          | I |  |
|  |    |  |  |  |  |  |  |  | 938 556.9946  | 1667.962 | 3 | 1667.961 | 0.001   | 0 | 76.99 | 3.30E-07 | AVQOPDGLVAVLGIK          | I |  |
|  |    |  |  |  |  |  |  |  | 939 834.9887  | 1667.963 | 2 | 1667.961 | 0.0018  | 0 | 85.35 | 5.40E-08 | AVQOPDGLVAVLGIK          | I |  |
|  |    |  |  |  |  |  |  |  | 940 834.9888  | 1667.963 | 2 | 1667.961 | 0.0021  | 0 | 29.43 | 0.021    | AVQOPDGLVAVLGIK          | I |  |
|  |    |  |  |  |  |  |  |  | 971 578.6426  | 1708.906 | 2 | 1708.905 | 0.0012  | 1 | 30.81 | 0.05     | KVAAEHLHWNTK             | Y |  |
|  |    |  |  |  |  |  |  |  | 972 578.6426  | 1708.906 | 2 | 1708.905 | 0.0013  | 1 | 41.93 | 0.0039   | KVAAEHLHWNTK             | Y |  |
|  |    |  |  |  |  |  |  |  | 1251 628.5501 | 2510.171 | 4 | 2510.173 | -0.0016 | 0 | 32.74 | 0.021    | LIQFHFWGSSDGGSEHTVNK     | K |  |
|  |    |  |  |  |  |  |  |  | 1252 628.5501 | 2510.171 | 4 | 2510.173 | -0.0014 | 0 | 31.17 | 0.03     | LIQFHFWGSSDGGSEHTVNK     | K |  |
|  |    |  |  |  |  |  |  |  | 1253 628.5505 | 2510.173 | 4 | 2510.173 | 0.0001  | 0 | 51.84 | 0.00026  | LIQFHFWGSSDGGSEHTVNK     | K |  |
|  |    |  |  |  |  |  |  |  | 1255 628.5506 | 2510.173 | 4 | 2510.173 | 0.0005  | 0 | 40.98 | 0.003    | LIQFHFWGSSDGGSEHTVNK     | K |  |
|  |    |  |  |  |  |  |  |  | 1256 837.732  | 2510.174 | 3 | 2510.173 | 0.0014  | 0 | 44.93 | 0.0014   | LIQFHFWGSSDGGSEHTVNK     | K |  |
|  |    |  |  |  |  |  |  |  | 1257 837.7325 | 2510.176 | 3 | 2510.173 | 0.0031  | 0 | 41.27 | 0.003    | LIQFHFWGSSDGGSEHTVNK     | K |  |
|  |    |  |  |  |  |  |  |  | 1269 850.4017 | 2548.183 | 3 | 2548.183 | 0.0004  | 0 | 65.11 | 1.20E-05 | SIVNNGHSFNVEFDSQDNVALK   | G |  |
|  |    |  |  |  |  |  |  |  | 1270 850.4018 | 2548.184 | 3 | 2548.183 | 0.0005  | 0 | 67.13 | 7.30E-06 | SIVNNGHSFNVEFDSQDNVALK   | G |  |
|  |    |  |  |  |  |  |  |  | 1291 862.833  | 2647.504 | 2 | 2647.506 | 0.0002  | 0 | 52.97 | 2.40E-05 | AVQOPDGLVAVLGIKIPASQGLK  | V |  |
|  |    |  |  |  |  |  |  |  | 1290 883.5095 | 2647.507 | 3 | 2647.506 | 0.0006  | 1 | 62.64 | 2.50E-06 | AVQOPDGLVAVLGIKIPASQGLK  | V |  |
|  | </ |  |  |  |  |  |  |  |               |          |   |          |         |   |       |          |                          |   |  |



|        |                           |                           |      |    |       |       |          |          |   |          |         |   |        |          |   |                              |   |
|--------|---------------------------|---------------------------|------|----|-------|-------|----------|----------|---|----------|---------|---|--------|----------|---|------------------------------|---|
|        |                           |                           |      |    |       | 747   | 654.8255 | 1307.636 | 2 | 1307.636 | 0.0007  | 0 | 57.74  | 0.00019  | K | ALTSDFEQR                    | K |
|        |                           |                           |      |    |       | 748   | 654.8256 | 1307.637 | 2 | 1307.636 | 0.0008  | 0 | 66.42  | 2.60E-05 | K | ALTSDFEQR                    | K |
|        |                           |                           |      |    |       | 813   | 718.873  | 1435.732 | 2 | 1435.731 | 0.0009  | 1 | 76.04  | 2.40E-06 | K | KALTSDFEQR                   | K |
|        |                           |                           |      |    |       | 917   | 855.4717 | 1768.929 | 2 | 1768.928 | 0.0009  | 0 | 81.81  | 4.00E-07 | K | LALLSLTTGGTAEVTK             | D |
|        |                           |                           |      |    |       | 925   | 880.9327 | 1779.851 | 2 | 1779.851 | 0       | 0 | 42.87  | 0.0039   | R | GFAPDFPGVDSGFLK              | D |
|        |                           |                           |      |    |       | 926   | 594.291  | 1779.851 | 3 | 1779.851 | 0.0002  | 0 | 34.32  | 0.026    | R | GFAPDFPGVDSGFLK              | G |
|        |                           |                           |      |    |       | 927   | 890.9329 | 1779.851 | 2 | 1779.851 | 0.0004  | 0 | 36.84  | 0.015    | R | GFAPDFPGVDSGFLK              | G |
|        |                           |                           |      |    |       | 928   | 890.9332 | 1779.852 | 2 | 1779.851 | 0.0011  | 0 | 53.18  | 0.00036  | R | GFAPDFPGVDSGFLK              | G |
|        |                           |                           |      |    |       | 929   | 595.9819 | 1784.924 | 2 | 1784.923 | 0.0006  | 0 | 57.59  | 0.00012  | K | LALLSLTTGGTAEVTK             | D |
|        |                           |                           |      |    |       | 930   | 893.4692 | 1784.924 | 2 | 1784.923 | 0.0008  | 0 | 97.38  | 1.20E-08 | K | LALLSLTTGGTAEVTK             | D |
|        |                           |                           |      |    |       | 931   | 893.47   | 1784.925 | 2 | 1784.923 | 0.0024  | 0 | 104.06 | 2.60E-09 | K | LALLSLTTGGTAEVTK             | D |
|        |                           |                           |      |    |       | 956   | 916.9019 | 1831.789 | 2 | 1831.788 | 0.0017  | 0 | 34.03  | 0.011    | K | EEPIHC*PPWYFQE               | - |
|        |                           |                           |      |    |       | 976   | 657.6676 | 1970.041 | 3 | 1970.039 | 0.0016  | 1 | 34.47  | 0.018    | K | GLRALLSLTTGGTAEVTK           | D |
|        |                           |                           |      |    |       | 978   | 988.5027 | 1974.991 | 2 | 1974.991 | 0.0001  | 0 | 102.23 | 3.80E-09 | R | VLLAYEPVWAIQTGK              | T |
|        |                           |                           |      |    |       | 979   | 659.3376 | 1974.991 | 3 | 1974.991 | 0.0013  | 0 | 67.95  | 1.00E-05 | K | VLLAYEPVWAIQTGK              | K |
|        |                           |                           |      |    |       | 980   | 988.5034 | 1974.992 | 2 | 1974.991 | 0.0023  | 0 | 58.12  | 0.0001   | K | VLLAYEPVWAIQTGK              | T |
|        |                           |                           |      |    |       | 1009  | 702.0358 | 2103.066 | 3 | 2103.065 | 0.0007  | 1 | 46.75  | 0.001    | K | VLLAYEPVWAIQTGK              | V |
|        |                           |                           |      |    |       | 1011  | 707.3192 | 2118.936 | 2 | 2118.935 | 0.0008  | 0 | 29.03  | 0.042    | K | QCCTVTSVDSLYSM@NFPER         | V |
|        |                           |                           |      |    |       | 1012  | 1060.476 | 2118.936 | 2 | 2118.935 | 0.0013  | 0 | 61.1   | 2.70E-05 | R | QCCTVTSVDSLYSM@NFPER         | A |
|        |                           |                           |      |    |       | 1149  | 875.7418 | 2624.204 | 3 | 2624.203 | 0.0006  | 0 | 47.05  | 0.00055  | R | NDITGAPSNPDVFSYGIETHAYK      | K |
| P17751 | Triosephosphate isomerase | 505                       | 15   | 10 | 26696 | 563   | 569.2892 | 1136.564 | 2 | 1136.565 | -0.001  | 0 | 50.02  | 0.00015  | K | IAVAQNC*YK                   | I |
|        |                           |                           |      |    |       | 689   | 624.3015 | 1246.589 | 2 | 1246.59  | -0.0017 | 0 | 57.03  | 0.00021  | K | SNVNDGVIAQSTR                | I |
|        |                           |                           |      |    |       | 765   | 663.897  | 1325.665 | 2 | 1325.665 | -0.0002 | 0 | 81.1   | 7.10E-07 | R | IYGVSGVTGATC*K               | E |
|        |                           |                           |      |    |       | 766   | 663.897  | 1325.665 | 2 | 1325.665 | -0.0002 | 0 | 49.48  | 0.0012   | R | IYGVSGVTGATC*K               | E |
|        |                           |                           |      |    |       | 819   | 486.912  | 1457.714 | 3 | 1457.715 | -0.0008 | 0 | 41.12  | 0.0072   | R | IYGVSGVTGATC*K               | V |
|        |                           |                           |      |    |       | 820   | 729.865  | 1457.714 | 3 | 1457.715 | 0.0004  | 0 | 58.75  | 0.00011  | R | HVFGSEDLIGQK                 | V |
|        |                           |                           |      |    |       | 824   | 489.5781 | 1465.713 | 3 | 1465.716 | -0.0036 | 0 | 36.82  | 0.023    | K | TATPQQAQEVHEK                | L |
|        |                           |                           |      |    |       | 825   | 733.864  | 1465.714 | 2 | 1465.716 | -0.0026 | 0 | 54.3   | 0.0004   | K | TATPQQAQEVHEK                | L |
|        |                           |                           |      |    |       | 859   | 534.968  | 1601.882 | 3 | 1601.882 | 0.0005  | 0 | 74.42  | 1.50E-06 | K | VVLLAYEPVWAIQTGK             | T |
|        |                           |                           |      |    |       | 860   | 801.9485 | 1601.883 | 2 | 1601.882 | 0.0008  | 0 | 70.31  | 4.10E-06 | K | VVLLAYEPVWAIQTGK             | T |
|        |                           |                           |      |    |       | 861   | 801.9485 | 1601.883 | 2 | 1601.882 | 0.0008  | 0 | 32.38  | 0.025    | K | VVLLAYEPVWAIQTGK             | T |
|        |                           |                           |      |    |       | 866   | 811.4155 | 1636.812 | 2 | 1636.818 | 0.0016  | 0 | 46.38  | 0.0022   | K | VNTGAFGTGEISPGMIK            | D |
|        |                           |                           |      |    |       | 872   | 819.4141 | 1636.814 | 2 | 1636.813 | 0.0005  | 0 | 80.93  | 7.60E-07 | K | VNTGAFGTGEISPGMIK            | D |
|        |                           |                           |      |    |       | 952   | 608.6615 | 1822.963 | 3 | 1822.961 | 0.0016  | 0 | 38.28  | 0.0075   | K | VSHALAEGLGVAC*IGEK           | L |
|        |                           |                           |      |    |       | 1166  | 1010.533 | 3028.577 | 3 | 3028.576 | -0.0017 | 0 | 41.77  | 0.00015  | K | ELASQPDVDFGLVGGASLKPFEVDINAK | Q |
|        |                           |                           |      |    |       | 796   | 704.8214 | 1407.628 | 2 | 1407.63  | -0.0017 | 0 | 45.05  | 0.00019  | K | SDGALVDC*GTSAGK              | L |
|        |                           |                           |      |    |       | 840   | 523.8759 | 1568.852 | 3 | 1568.852 | 0.0002  | 0 | 33.64  | 0.029    | K | VVLLAYEPVWAIQTGK             | R |
|        |                           |                           |      |    |       | 892   | 846.9536 | 1691.893 | 2 | 1691.892 | 0.0009  | 0 | 34.03  | 0.025    | K | TVNVISSC*ALQPK               | G |
|        |                           |                           |      |    |       | 910   | 868.9298 | 1735.845 | 2 | 1735.845 | 0       | 0 | 58.41  | 0.00013  | R | DM@LYQVLAEEFVSR              | V |
|        |                           |                           |      |    |       | 951   | 833.9538 | 1865.853 | 3 | 1865.843 | 0.0007  | 0 | 56.11  | 0.00013  | R | MNSGAFGTGEISPGMIK            | D |
|        |                           |                           |      |    |       | 993   | 668.6663 | 2002.977 | 3 | 2002.978 | -0.0011 | 0 | 33.07  | 0.037    | R | VLSYAPGLNDM@QQLAR            | E |
|        |                           |                           |      |    |       | 14    | 379.2323 | 756.45   | 2 | 756.4494 | 0.0007  | 0 | 38.53  | 0.014    | R | ILVQER                       | L |
|        |                           |                           |      |    |       | 836   | 757.4299 | 1512.845 | 2 | 1512.845 | 0.0007  | 0 | 80.9   | 4.00E-07 | R | AGVM@AALNLIQIR               | H |
|        |                           |                           |      |    |       | 884   | 555.6572 | 1663.95  | 3 | 1663.951 | -0.001  | 0 | 48.28  | 0.00028  | K | INEA@VYQALINDPK              | T |
|        |                           |                           |      |    |       | 885   | 832.9626 | 1663.95  | 3 | 1663.951 | -0.0004 | 0 | 75.2   | 5.80E-07 | R | INEA@VYQALINDPK              | T |
|        |                           |                           |      |    |       | 1015  | 718.3832 | 2152.128 | 3 | 2152.128 | 0.0001  | 0 | 35.79  | 0.01     | K | HILGFDGDAVLEAAQILR           | T |
|        |                           |                           |      |    |       | 1045  | 517.8032 | 1033.592 | 2 | 1033.592 | -0.0003 | 0 | 73.17  | 3.80E-06 | R | AGVSVYGIIR                   | L |
|        |                           |                           |      |    |       | 968   | 812.8456 | 1623.677 | 2 | 1623.677 | -0.0002 | 0 | 34.74  | 0.008    | M | #ANEANPC*PC*DIHGK            | L |
|        |                           |                           |      |    |       | 923   | 830.6383 | 178.777  | 3 | 1778.778 | -0.0006 | 0 | 30.87  | 0.037    | R | EDC@NDVPIHEAR                | L |
|        |                           |                           |      |    |       | 1159  | 940.1677 | 2817.481 | 3 | 2817.48  | 0.0011  | 0 | 43.15  | 0.00083  | K | NPTLFFAENDVTPLEQVSTLTQK      | L |
| 72     | P17751                    | Triosephosphate isomerase | 1287 | 34 | 12    | 26696 | 6.9      |          |   |          |         |   |        |          |   |                              |   |
|        |                           |                           |      |    |       | 270   | 477.7451 | 953.4757 | 2 | 953.476  | -0.0003 | 0 | 35.47  | 0.036    | K | FFVGGNWK                     | M |
|        |                           |                           |      |    |       | 568   | 569.2895 | 1136.564 | 2 | 1136.565 | -0.0024 | 0 | 58.51  | 0.0002   | K | IAVAQNC*YK                   | V |
|        |                           |                           |      |    |       | 733   | 624.3024 | 1246.589 | 2 | 1246.59  | 0.0001  | 0 | 70.23  | 9.40E-06 | K | SNVNDGVIAQSTR                | V |
|        |                           |                           |      |    |       | 800   | 663.8398 | 1325.663 | 2 | 1325.665 | -0.0016 | 0 | 48.28  | 0.0016   | R | IYGVSGVTGATC*K               | E |
|        |                           |                           |      |    |       | 802   | 663.8393 | 1325.664 | 2 | 1325.665 | -0.0009 | 0 | 71.64  | 7.00E-06 | R | IYGVSGVTGATC*K               | E |
|        |                           |                           |      |    |       | 803   | 663.8393 | 1325.664 | 2 | 1325.665 | -0.0009 | 0 | 93.7   | 4.30E-08 | R | IYGVSGVTGATC*K               | E |
|        |                           |                           |      |    |       | 894   | 653.9401 | 1325.666 | 3 | 1325.665 | 0.0007  | 0 | 74.31  | 3.50E-06 | R | IYGVSGVTGATC*K               | E |
|        |                           |                           |      |    |       | 889   | 486.9122 | 1457.715 | 3 | 1457.715 | -0.0004 | 0 | 67.2   | 1.70E-05 | R | HVFGSEDLIGQK                 | V |
|        |                           |                           |      |    |       | 890   | 729.8646 | 1457.715 | 3 | 1457.715 | -0.0004 | 0 | 52.09  | 0.00056  | R | HVFGSEDLIGQK                 | V |
|        |                           |                           |      |    |       | 892   | 729.8647 | 1457.715 | 3 | 1457.715 | -0.0002 | 0 | 68.4   | 1.30E-05 | R | HVFGSEDLIGQK                 | V |
|        |                           |                           |      |    |       | 893   | 486.9123 | 1457.715 | 3 | 1457.715 | 0.0001  | 0 | 39.81  | 0.0095   | R | HVFGSEDLIGQK                 | V |
|        |                           |                           |      |    |       | 898   | 489.5789 | 1465.713 | 3 | 1465.716 | -0.0014 | 0 | 36.11  | 0.029    | R | TATPQQAQEVHEK                | L |
|        |                           |                           |      |    |       | 901   | 733.8654 | 1465.716 | 2 | 1465.716 | 0.0002  | 0 | 68.48  | 1.60E-05 | K | TATPQQAQEVHEK                | L |
|        |                           |                           |      |    |       | 902   | 733.8655 | 1465.716 | 2 | 1465.716 | 0.0003  | 0 | 43.78  | 0.0046   | K | TATPQQAQEVHEK                | L |
|        |                           |                           |      |    |       | 948   | 513.9352 | 1538.784 | 3 | 1538.784 | -0.0003 | 0 | 44.2   | 0.0034   | K | DLGATVWVLLGHSER              | R |
|        |                           |                           |      |    |       | 949   | 513.9354 | 1538.784 | 3 | 1538.784 | -0.0003 | 0 | 33.7   | 0.04     | K | DLGATVWVLLGHSER              | R |
|        |                           |                           |      |    |       | 950   | 770.3995 | 1538.785 | 2 | 1538.784 | 0.0004  | 0 | 81.67  | 6.10E-08 | K | DLGATVWVLLGHSER              | R |
|        |                           |                           |      |    |       | 992   | 534.9677 | 1601.881 | 3 | 1601.882 | -0.0006 | 0 | 78.8   | 6.10E-07 | K | VVLLAYEPVWAIQTGK             | T |
|        |                           |                           |      |    |       | 993   | 534.9678 | 1601.882 | 3 | 1601.882 | -0.0002 | 0 | 54.46  | 0.00016  | K | VVLLAYEPVWAIQTGK             | T |
|        |                           |                           |      |    |       | 994   | 801.9486 | 1601.883 | 2 | 1601.882 | 0.0009  | 0 | 93.48  | 2.00E-08 | K | VVLLAYEPVWAIQTGK             | T |
|        |                           |                           |      |    |       | 995   | 801.9487 | 1601.883 | 2 | 1601.882 | 0.0011  | 0 | 30.41  | 0.04     | K | VVLLAYEPVWAIQTGK             | T |
|        |                           |                           |      |    |       | 996   | 801.949  | 1601.883 | 2 | 1601.882 | 0.0017  | 0 | 89.88  | 4.70E-08 | K | VVLLAYEPVWAIQTGK             | T |
|        |                           |                           |      |    |       | 1016  | 541.2797 | 1620.817 | 3 | 1620.818 | -0.0008 | 0 | 39.52  | 0.011    | K | VNTGAFGTGEISPGMIK            | D |
|        |                           |                           |      |    |       | 1017  | 814.4171 | 1620.82  | 2 | 1620.818 | 0.0015  | 0 | 104.47 | 3.50E-09 | K | VNTGAFGTGEISPGMIK            | D |
|        |                           |                           |      |    |       | 1033  | 819.4134 |          |   |          |         |   |        |          |   |                              |   |



|        |                           |     |   |   |       |      |                                                                           |                                                                              |                                                                                   |                                                                                    |                                                                     |                                                                         |                                                                          |                                                                              |                                                                             |                                                                            |                                                                              |                                                                              |                                                                               |                                                                               |                                                                               |                                                                             |                                                                             |                                                                                |                                                                               |                                                                              |                                                                                 |                                                                                  |                                                                                 |                                                                                |                                                                                   |                                                                                  |                                                                                   |                                                                                   |                                                                               |                                                                                 |                                                                                    |                                                                                    |                                                                                             |                                                                                               |                                                                                          |                                                                                       |                                                                                          |                                                                                         |                                                                                       |                                                                                       |                                                                                           |                                                                                          |                                                                                                         |                                                                                                         |                                                                             |                                                                             |                                                                             |                                                                                |                                                                               |                                                                            |                                                                              |                                                                             |                                                                                 |                                                                                    |                                                                                    |                                                                                 |                                                                                  |                                                   |                                                                      |                                                                           |                                                                             |                                                                            |                                                                            |                                                                           |                                                                            |                                                                           |                                                                             |                                                                            |                                                                              |                                                                            |                                                                              |                                                                               |                                                                                  |                                                                                 |                                                                   |                                                                       |                                                                         |                                                                       |                                                                              |
|--------|---------------------------|-----|---|---|-------|------|---------------------------------------------------------------------------|------------------------------------------------------------------------------|-----------------------------------------------------------------------------------|------------------------------------------------------------------------------------|---------------------------------------------------------------------|-------------------------------------------------------------------------|--------------------------------------------------------------------------|------------------------------------------------------------------------------|-----------------------------------------------------------------------------|----------------------------------------------------------------------------|------------------------------------------------------------------------------|------------------------------------------------------------------------------|-------------------------------------------------------------------------------|-------------------------------------------------------------------------------|-------------------------------------------------------------------------------|-----------------------------------------------------------------------------|-----------------------------------------------------------------------------|--------------------------------------------------------------------------------|-------------------------------------------------------------------------------|------------------------------------------------------------------------------|---------------------------------------------------------------------------------|----------------------------------------------------------------------------------|---------------------------------------------------------------------------------|--------------------------------------------------------------------------------|-----------------------------------------------------------------------------------|----------------------------------------------------------------------------------|-----------------------------------------------------------------------------------|-----------------------------------------------------------------------------------|-------------------------------------------------------------------------------|---------------------------------------------------------------------------------|------------------------------------------------------------------------------------|------------------------------------------------------------------------------------|---------------------------------------------------------------------------------------------|-----------------------------------------------------------------------------------------------|------------------------------------------------------------------------------------------|---------------------------------------------------------------------------------------|------------------------------------------------------------------------------------------|-----------------------------------------------------------------------------------------|---------------------------------------------------------------------------------------|---------------------------------------------------------------------------------------|-------------------------------------------------------------------------------------------|------------------------------------------------------------------------------------------|---------------------------------------------------------------------------------------------------------|---------------------------------------------------------------------------------------------------------|-----------------------------------------------------------------------------|-----------------------------------------------------------------------------|-----------------------------------------------------------------------------|--------------------------------------------------------------------------------|-------------------------------------------------------------------------------|----------------------------------------------------------------------------|------------------------------------------------------------------------------|-----------------------------------------------------------------------------|---------------------------------------------------------------------------------|------------------------------------------------------------------------------------|------------------------------------------------------------------------------------|---------------------------------------------------------------------------------|----------------------------------------------------------------------------------|---------------------------------------------------|----------------------------------------------------------------------|---------------------------------------------------------------------------|-----------------------------------------------------------------------------|----------------------------------------------------------------------------|----------------------------------------------------------------------------|---------------------------------------------------------------------------|----------------------------------------------------------------------------|---------------------------------------------------------------------------|-----------------------------------------------------------------------------|----------------------------------------------------------------------------|------------------------------------------------------------------------------|----------------------------------------------------------------------------|------------------------------------------------------------------------------|-------------------------------------------------------------------------------|----------------------------------------------------------------------------------|---------------------------------------------------------------------------------|-------------------------------------------------------------------|-----------------------------------------------------------------------|-------------------------------------------------------------------------|-----------------------------------------------------------------------|------------------------------------------------------------------------------|
| P14602 | Heat shock protein beta-1 | 131 | 5 | 4 | 23405 | 6.23 | 830 716.9295 1431.845 2 1431.845 -0.0005 1 42.66 0.0006 K LKLSILYPATTGR N | 884 771.9258 1541.837 2 1541.838 -0.0004 0 79.92 8.10E-07 R DLAILLGM@LDPEK E | 1062 714.6989 2141.075 3 2141.075 -0.0008 0 40.85 0.0059 M PGGLLLDGEAPNFENTTIGR I | 1063 1071.545 2141.076 2 2141.075 0.0002 0 81.83 4.50E-07 M PGGLLLDGEAPNFENTTIGR H | 266 466.2592 930.519 2 930.522 0.0003 0 38.06 0.058 K EGVVETGK O    | 477 538.2902 1074.566 2 1074.567 -0.001 0 78.06 3.20E-06 R QLSSGVSEIR Q | 574 575.3062 1148.598 2 1148.598 0 0 54.78 0.00048 R LFDQAFVGR L         | 999 599.9842 1796.931 3 1796.931 -0.0001 0 33.8 0.029 R VSLDVFHFAPELTVK T    | 1000 899.4731 1796.932 2 1796.931 0.0008 0 40.43 0.0058 R VSLDVFHFAPELTVK T |                                                                            |                                                                              |                                                                              |                                                                               |                                                                               |                                                                               |                                                                             |                                                                             |                                                                                |                                                                               |                                                                              |                                                                                 |                                                                                  |                                                                                 |                                                                                |                                                                                   |                                                                                  |                                                                                   |                                                                                   |                                                                               |                                                                                 |                                                                                    |                                                                                    |                                                                                             |                                                                                               |                                                                                          |                                                                                       |                                                                                          |                                                                                         |                                                                                       |                                                                                       |                                                                                           |                                                                                          |                                                                                                         |                                                                                                         |                                                                             |                                                                             |                                                                             |                                                                                |                                                                               |                                                                            |                                                                              |                                                                             |                                                                                 |                                                                                    |                                                                                    |                                                                                 |                                                                                  |                                                   |                                                                      |                                                                           |                                                                             |                                                                            |                                                                            |                                                                           |                                                                            |                                                                           |                                                                             |                                                                            |                                                                              |                                                                            |                                                                              |                                                                               |                                                                                  |                                                                                 |                                                                   |                                                                       |                                                                         |                                                                       |                                                                              |
|        |                           |     |   |   |       |      | 104 416.2582 830.519 2 830.514 0.0004 0 34.6 0.05 R VPSLLR S              | 270 466.2578 930.511 2 930.522 -0.0011 0 36.95 0.042 K EGVVETGK H            | 271 466.2578 930.511 2 930.522 -0.0011 0 55.4 0.0006 K EGVVETGK H                 | 272 466.2578 930.511 2 930.522 -0.0009 0 60.06 0.0002 K EGVVETGK H                 | 273 466.2581 930.517 2 930.522 -0.0005 0 60.16 0.00022 K EGVVETGK H | 360 494.308 986.6014 2 986.6025 -0.0011 1 37.79 0.0085 R RVPSLLR S      | 393 503.2424 1004.47 2 1004.472 -0.0013 0 44.97 0.0042 R SPSWEPFR S      | 394 503.2425 1004.47 2 1004.472 -0.0011 0 45.67 0.0033 R D SPSWFR D          | 395 503.2428 1004.471 2 1004.472 -0.0005 0 45.96 0.003 R SPSWEPFR D         | 457 516.2379 1030.461 2 1030.462 -0.0008 0 33.44 0.023 R DWYPAHSR L        | 563 538.2899 1074.565 2 1074.567 -0.0018 0 58.44 0.0003 R QLSSGVSEIR Q       | 564 538.29 1074.565 2 1074.567 -0.0015 0 78.96 2.70E-06 R QLSSGVSEIR Q       | 565 538.29 1074.566 2 1074.567 -0.0014 0 67.07 4.10E-05 R QLSSGVSEIR Q        | 566 538.29 1074.566 2 1074.567 -0.0014 0 50.74 0.0018 R QLSSGVSEIR Q          | 567 538.2902 1074.566 2 1074.567 -0.0012 0 59.36 0.00023 R QLSSGVSEIR Q       | 568 538.2902 1074.566 2 1074.567 -0.0012 0 67.4 4.00E-05 R QLSSGVSEIR Q     | 569 538.2902 1074.566 2 1074.567 -0.0012 0 77.81 3.30E-06 R QLSSGVSEIR Q    | 618 552.7563 1103.498 2 1103.5 -0.0015 0 40.88 0.0063 R QDEHGVISR C            | 704 575.3057 1148.597 2 1148.598 -0.001 0 70.29 1.30E-05 R LFDQAFVGR L        | 705 575.3058 1148.597 2 1148.598 -0.0007 0 63.47 6.30E-05 R LFDQAFVGR L      | 706 575.3058 1148.597 2 1148.598 -0.0007 0 65.41 4.00E-05 R LFDQAFVGR L         | 707 575.3062 1148.598 2 1148.598 0 0 54.26 0.00054 R LFDQAFVGR L                 | 743 580.8287 1159.643 2 1159.645 -0.0019 1 60.33 9.90E-05 K TRKEGVETGK H        | 1089 494.9224 1481.745 3 1481.747 -0.002 1 35.42 0.026 K EGVVETGKHEER Q        | 1165 538.9402 1613.799 3 1613.801 -0.002 1 35.16 0.029 R AQIGPEAKSEQSGAK -        | 1167 807.9078 1613.801 2 1613.801 0.0002 0 77.31 1.80E-06 R AQIGPEAKSEQSGAK -    | 1260 599.9838 1796.93 3 1796.931 -0.0012 0 35.72 0.018 K VSLDVFHFAPELTVK T        | 1262 599.9839 1796.93 3 1796.931 -0.0008 0 39.59 0.0077 R VSLDVFHFAPELTVK T       | 1263 899.4723 1796.93 2 1796.931 -0.0008 0 55.29 0.00021 R VSLDVFHFAPELTVK T  | 1295 916.9809 1831.967 2 1831.968 -0.0007 0 66.02 1.30E-05 K AVTQSAEITPVTFEER A | 1296 916.981 1831.968 2 1831.968 -0.0004 0 80.69 4.80E-07 R AVTQSAEITPVTFEER A     | 1297 916.9811 1831.968 2 1831.968 -0.0002 0 68.42 7.70E-06 K AVTQSAEITPVTFEER A    | 1480 1022.548 3064.621 3 3064.622 -0.0014 0 49.59 0.00015 K YTLPPGVDPVTLVSSLSPEGLTVEAPLPK A | 1482 1065.245 3192.714 3 3192.717 -0.0011 1 57.97 1.50E-05 R KYTLPPGVDPVTLVSSLSPEGLTVEAPLPK A | 238 453.7376 905.406 2 905.407 -0.0001 0 45.52 0.0057 R NFDLIR K                         | 427 511.2898 1020.564 2 1020.564 -0.0013 0 42.69 0.0069 R VVIFGPKD K                  | 429 511.2892 1020.564 2 1020.564 -0.0005 0 66.43 2.70E-05 R VVIFGPKD K                   | 518 529.2992 1056.584 2 1056.586 -0.0017 0 50.6 0.0013 K LPFFIDDK G                     | 520 529.2998 1056.585 2 1056.586 -0.0005 0 56.55 0.00031 K LPFFIDDK G                 | 712 575.3364 1148.659 2 1148.659 -0.0011 1 39.75 0.0073 R VVIFGPKD K                  | 713 575.3365 1148.659 2 1148.659 -0.0008 1 47.2 0.0013 R VVIFGPKD K                       | 715 383.8943 1148.661 3 1148.659 0.0016 1 51.05 0.00049 R VVIFGPKD K                     | 1010 696.3322 1394.65 2 1394.65 -0.0003 0 34.47 0.031 R DFTPVCTTELGR L                                  | 1011 696.3323 1394.65 2 1394.65 0.0001 0 68.35 1.30E-05 R DFTPVCTTELGR L                                | 1038 716.9298 1431.844 3 1431.845 -0.0005 0 42.55 0.00076 K LKLSILYPATTGR N | 1039 716.9295 1431.845 2 1431.845 -0.0005 1 50.28 0.00011 K LKLSILYPATTGR N | 1056 726.3352 1450.656 2 1450.658 -0.0017 0 83.83 2.50E-07 K DINAYNETPTEK L | 1122 771.9255 1541.837 2 1541.838 -0.0009 0 102.97 3.90E-09 R DLAILLGM@LDPEK D | 1123 771.9257 1541.837 2 1541.838 -0.0007 0 99.79 8.30E-07 R DLAILLGM@LDPEK D | 1124 771.9257 1541.837 2 1541.838 -0.0006 0 38.72 0.011 R DLAILLGM@LDPEK D | 1226 860.9192 1719.824 2 1719.824 0.0003 0 54.32 0.00027 K GESVM@VPTLSEEEK O | 1314 616.9795 1847.917 3 1847.919 -0.002 1 44.34 0.003 K KGESVM@VPTLSEEEK O | 1315 924.9662 1847.918 2 1847.919 -0.0008 0 61.48 5.70E-05 K KGESVM@VPTLSEEEK O | 1387 1071.544 2141.075 2 2141.075 -0.0002 0 91.29 4.0E-05 R PGGLLLDGEAPNFENTTIGR I | 1388 714.6986 2141.074 3 2141.075 -0.0013 0 50.38 0.00062 M PGGLLLDGEAPNFENTTIGR I | 1389 714.699 2141.075 3 2141.075 -0.0002 0 31.89 0.045 M PGGLLLDGEAPNFENTTIGR I | 1394 718.7314 2153.172 3 2153.173 -0.0009 0 50.32 0.00024 R VVDSQLQTRKVPATPVDK K | 679 298.2656 501.17 2 501.17 0.0016 K IAVACN@YK A | 680 569.2889 1136.653 2 1136.655 -0.0016 0 39.57 0.018 K IAVACN@YK A | 896 624.3018 1246.589 2 1246.59 -0.0012 0 75.82 2.60E-06 K SNVNDGVAQSTR I | 978 663.8389 1325.663 2 1325.665 -0.0018 0 89.63 1.20E-07 R IYVGSVGTATC@K E | 979 663.8389 1325.663 2 1325.665 -0.0016 0 59.27 0.00013 R IYVGSVGTATC@K E | 980 663.839 1325.663 2 1325.665 -0.0015 0 96.15 2.60E-06 R IYVGSVGTATC@K E | 1062 486.9118 1457.714 3 1457.715 -0.0014 0 53.29 0.00043 R HVFGEDELIGQ V | 1063 729.8645 1457.715 3 1457.715 -0.0006 0 72.03 5.80E-06 R HVFGEDELIGQ V | 1072 489.5789 1465.716 3 1465.716 -0.0012 0 48.04 0.0018 K TATPQQAQVEHK L | 1073 733.8511 1465.716 3 1465.716 -0.0004 0 65.39 3.40E-05 K TATPQQAQVEHK L | 1117 513.9349 1538.783 3 1538.784 -0.0014 0 35.67 0.027 K DLGATVWVGHSEER R | 1118 770.3994 1538.784 2 1538.784 0.0001 0 87.16 1.80E-07 R DLGATVWVGHSEER R | 1152 534.9674 1601.88 3 1601.882 -0.0013 0 33.43 0.022 K VVLAPEVPPVAIGTK T | 1153 801.9476 1601.881 2 1601.882 -0.001 0 54.42 0.00017 K VVLAPEVPPVAIGTK T | 1154 801.9482 1601.882 2 1601.882 0.0001 0 67.07 8.60E-06 K VVLAPEVPPVAIGTK T | 1180 819.4135 1636.812 2 1636.813 -0.0007 0 82.82 5.10E-07 K VTNGAFTGEISPGM@IK D | 1181 546.6115 1636.813 3 1636.813 -0.0004 0 56.29 0.00023 K VTNGAFTGEISPGM@IK D | 107 417.2216 832.4287 2 832.429 -0.0003 0 41.08 0.011 R SVEETLR E | 426 112.2689 1020.523 2 1020.524 -0.0008 0 68.37 0.0012 K GTAYNGEKF E | 948 603.8328 1205.651 2 1205.652 -0.0004 0 52.15 0.00066 K HSLVNDPVRG R | 929 636.3711 1270.728 2 1270.729 -0.0009 0 35.37 0.019 R GLFIDPNGVK H | 1085 738.9063 1475.798 2 1475.798 -0.0003 0 88.23 1.10E-07 R DYGVLLESAGLRL G |
|        |                           |     |   |   |       |      | 175 426.2075 850.4005 2 850.4007 -0.0002 0 36.83 0.037 K IFPM@GDR L       | 268 446.7605 891.5064 2 891.5065 -0.0001 0 44.94 0.0032 R LNLVEL E           | 269 446.7606 891.5066 2 891.5065 0.0001 0 34.51 0.036 R LNLVEL E                  | 270 446.7607 891.5069 2 891.5065 0.0004 0 44.6 0.0033 R LNLVEL E                   | 393 495.2445 989.4745 2 989.476 -0.0015 0 57.8 0.00027 K NCVIAADR D | 652 382.528 1144.571 3 1144.571 0.0005 1 35.57 0.039 R NCVIAADR D       | 953 759.3435 1516.673 2 1516.672 0.0001 0 35.47 0.015 M #S@SYNGGAVMAMK G | 959 767.3411 1532.668 2 1532.667 0.0003 0 59.14 5.30E-05 M #S@SYNGGAVM@AMK G | 960 767.3412 1532.668 2 1532.667 0.0006 0 44.09 0.0018 M #S@SYNGGAVM@AMK G  | 881 767.3416 1532.669 2 1532.667 0.0013 0 71.69 0.0006 M #S@SYNGGAVM@AMK G | 972 775.3373 1548.66 2 1548.662 -0.0022 0 75.5 7.80E-07 M #S@SYNGGAVM@AM@K G | 973 775.338 1548.662 2 1548.662 -0.0007 0 35.35 0.0094 M #S@SYNGGAVM@AM@K G  | 977 777.4208 1552.827 2 1552.828 -0.0013 0 84.27 2.70E-07 R DAVSGM@VIVHVEK D  | 984 523.9481 1568.823 3 1568.823 -0.0007 0 32.28 0.047 R DAVSGM@VIVHVEK D     | 985 745.4187 1568.823 2 1568.823 -0.0004 0 66.83 1.70E-05 R DAVSGM@VIVHVEK D  | 1003 807.4033 1612.792 2 1612.792 0 0 88.33 1.40E-07 R FGIAQAM@VTTDFQK I    | 1007 543.9356 1628.785 3 1628.787 -0.0019 0 33.09 0.046 R FGIAQAM@VTTDFQK I | 1008 815.3999 1628.785 2 1628.787 -0.0016 0 69.63 1.00E-05 R FGIAQAM@VTTDFQK I | 1009 815.4003 1628.786 2 1628.787 -0.0006 0 70.38 0.0096 R FGIAQAM@VTTDFQK I  | 1047 589.6375 1765.891 3 1765.893 -0.002 0 39.05 0.0096 R FGPYTPEVIAGLDPK T  | 1049 883.9532 1765.892 2 1765.893 -0.0009 0 47.42 0.0014 R FGPYTPEVIAGLDPK T    | 1050 883.9535 1765.892 2 1765.893 -0.0003 0 45.02 0.0023 R FGPYTPEVIAGLDPK T     | 1058 595.9696 1784.887 3 1784.888 -0.001 1 43.4 0.0036 R RFQIAGM@VTTDFQK I      | 1094 630.3538 1888.04 2 1888.042 -0.0024 0 33.75 0.01 R LVYGLAGLATDQVTAOR L    | 1095 945.0281 1888.042 2 1888.042 -0.0002 0 116.37 5.80E-11 R LVYGLAGLATDQVTAOR L | 1096 630.3547 1888.042 3 1888.042 0.0006 0 82.77 1.20E-07 R LVYGLAGLATDQVTAOR L  | 1146 725.3789 2173.115 3 2173.116 -0.0014 0 42.54 0.0028 R QIKPYTLM@SM@VANLLEYK R | 1147 725.3792 2173.116 3 2173.116 -0.0006 0 35.47 0.014 R QIKPYTLM@SM@VANLLEYK R  |                                                                               |                                                                                 |                                                                                    |                                                                                    |                                                                                             |                                                                                               |                                                                                          |                                                                                       |                                                                                          |                                                                                         |                                                                                       |                                                                                       |                                                                                           |                                                                                          |                                                                                                         |                                                                                                         |                                                                             |                                                                             |                                                                             |                                                                                |                                                                               |                                                                            |                                                                              |                                                                             |                                                                                 |                                                                                    |                                                                                    |                                                                                 |                                                                                  |                                                   |                                                                      |                                                                           |                                                                             |                                                                            |                                                                            |                                                                           |                                                                            |                                                                           |                                                                             |                                                                            |                                                                              |                                                                            |                                                                              |                                                                               |                                                                                  |                                                                                 |                                                                   |                                                                       |                                                                         |                                                                       |                                                                              |
|        |                           |     |   |   |       |      | 13 378.237 754.4594 2 754.4589 0.0005 1 31.71 0.027 K APLVKD -            | 14 378.2371 754.4596 2 754.4589 0.0008 1 35.12 0.012 K APLVKD -              | 96 408.2531 874.4917 2 874.4913 0.0004 0 35.37 0.039 K VTVAGLAGK D                | 213 437.7533 873.4922 2 873.492 0 0 47.21 0.0095 R DGLLTSR D                       | 214 437.7534 873.4923 2 873.492 0.0004 0 64.42 7.90E-05 K DGLLTSR G | 763 566.303 1130.591 2 1130.593 -0.0017 1 47.39 0.0031 K EILKEQESR K    | 764 566.3031 1130.592 2 1130.593 -0.0015 1 57.28 0.03 K EILKEQESR K      | 905 592.8714 1183.728 2 1183.729 -0.0006 1 39.26 2.60E-05 R AKIGTVAGLAGK K   | 906 595.8537 1183.729 3 1183.729 0.0004 0 35.57 0.064 R AKIGTVAGLAGK K      | 1014 615.8555 1229.696 2 1229.698 -0.0016 1 43.49 0.0037 R KEKDGLLTSR G    | 1015 410.9073 1229.7 3 1229.698 0.002 1 39.98 0.0069 R KEKDGLLTSR G          | 1288 516.8774 1547.611 3 1547.613 -0.0028 0 39.93 0.00093 K MMINGSHYSYSESR V | 1281 782.8105 1553.607 2 1553.608 0.0017 0 79.01 1.10E-07 M M@M@NGSHYSYSESR V | 1292 527.5408 1579.601 3 1579.603 -0.0025 0 39.21 0.00047 K M@M@NGSHYSYSESR V | 1293 790.8081 1579.602 2 1579.603 -0.0015 0 39.94 0.00047 K M@M@NGSHYSYSESR V | 1298 797.36 1592.706 2 1592.706 -0.0007 0 63.32 2.40E-05 R DVMIC@PDTSEDAK T | 1301 797.3616 1592.709 2 1592.706 0.0025 0 33.92 0.021 R DVMIC@PDTSEDAK T   | 1306 805.373 1608.701 2 1608.701 0.0011 0 52.32 0.00008 R DVMIC@PDTSEDAK T     | 1307 805.3576 1608.701 2 1608.701 -0.0005 0 59.45 4.70E-05 R DVMIC@PDTSEDAK T | 1309 805.3581 1608.702 2 1608.701 0.0005 0 57.59 6.90E-05 R DVMIC@PDTSEDAK T | 1331 553.2936 1656.859 3 1656.862 -0.0027 0 57.77 0.00012 K VTVAGLAGKDPVOC@SR D | 1332 553.2937 1656.859 2 1656.862 -0.0025 0 77.81 1.20E-06 M VTVAGLAGKDPVOC@SR D | 1333 829.4371 1656.86 2 1656.862 -0.0022 1 93.02 3.70E-08 K VTVAGLAGKDPVOC@SR D | 1334 553.2941 1656.861 3 1656.862 -0.0012 1 48.32 0.0011 K VTVAGLAGKDPVOC@SR D | 1345 838.4047 1674.795 2 1674.796 -0.0009 0 54.54 0.00028 R GAEMEM@ETVIVPDM@RR R  | 1356 846.4023 1690.79 2 1690.791 -0.0006 0 68.44 1.10E-05 R GAEMEM@ETVIVPDM@RR R | 1357 846.403 1690.791 2 1690.791 0.0008 0 85.86 1.80E-07 R GAEMEM@ETVIVPDM@RR R   | 1363 854.3994 1706.784 2 1706.786 -0.0012 0 66.31 1.60E-05 R GAEMEM@ETVIVPDM@RR R | 1435 616.6373 1846.89 3 1846.892 -0.0016 1 34.18 0.028 K GAEMEM@ETVIVPDM@RR A | 1448 621.9888 1862.884 3 1862.887 -0.0022 1 39.59 0.0078 K GAEMEM@ETVIVPDM@RR A | 1448 636.0131 1905.017 2 1905.025 -0.0074 0 76.49 8.90E-07 R GPGTSEFFAL@VEAL@V@K D | 1449 953.5179 1905.021 2 1905.025 -0.0034 0 90.49 3.30E-08 R GPGTSEFFAL@VEAL@V@K D | 1612 776.0729 2325.197 3 2325.197 -0.0005 0 53.24 0.00019 K GLAIAIC@GPTALLA@H@V@G@C@K V     | 1613 776.0732 2325.198 3 2325.197 0.0004 0 71.03 3.30E-06 K GLAIAIC@GPTALLA@H@V@G@C@K V       | 1614 1163.608 2325.202 2 2325.197 0.0004 0 104.48 1.40E-09 K GLAIAIC@GPTALLA@H@V@G@C@K V | 1656 814.33 2453.291 4 2453.292 -0.0013 1 31.14 0.0001 K KGLAIAIC@GPTALLA@H@V@G@C@K V | 1657 818.772 2453.292 3 2453.292 -0.0006 0 98.76 3.80E-09 R KGLAIAIC@GPTALLA@H@V@G@C@K V | 1658 818.7722 2453.295 3 2453.292 0.0025 1 86.6 6.60E-08 R KGLAIAIC@GPTALLA@H@V@G@C@K V | 1659 614.3314 2453.296 4 2453.292 0.0004 1 31.19 0.016 R KGLAIAIC@GPTALLA@H@V@G@C@K V | 1660 818.7737 2453.299 2 2453.292 0.0069 0 29.97 0.025 R KGLAIAIC@GPTALLA@H@V@G@C@K V | 1686 903.4698 2707.388 3 2707.389 -0.0016 1 52.01 0.0002 R GPGTSEFFAL@VEAL@V@K@M@AN@V@K A | 1687 903.4705 2707.39 3 2707.389 0.0006 1 48.39 0.00042 R GPGTSEFFAL@VEAL@V@K@M@AN@V@K A | 1690 933.741 2769.401 3 2769.401 0.0004 0 66.49 7.20E-06 K TQGPYD@V@V@L@P@G@N@L@G@A@N@L@S@E@S@P@M@V@K E | 1694 1924.104 2785.392 2 2785.396 -0.0032 0 42.75 0.0016 K TQGPYD@V@V@L@P@G@N@L@G@A@N@L@S@E@S@P@M@V@K E |                                                                             |                                                                             |                                                                             |                                                                                |                                                                               |                                                                            |                                                                              |                                                                             |                                                                                 |                                                                                    |                                                                                    |                                                                                 |                                                                                  |                                                   |                                                                      |                                                                           |                                                                             |                                                                            |                                                                            |                                                                           |                                                                            |                                                                           |                                                                             |                                                                            |                                                                              |                                                                            |                                                                              |                                                                               |                                                                                  |                                                                                 |                                                                   |                                                                       |                                                                         |                                                                       |                                                                              |

|        |                                       |                           |      |          |         |       |        |          |          |                              |          |          |         |       |          |          |                             |              |   |
|--------|---------------------------------------|---------------------------|------|----------|---------|-------|--------|----------|----------|------------------------------|----------|----------|---------|-------|----------|----------|-----------------------------|--------------|---|
| Q9RLP6 | GrpE protein homolog 1, mitochondrial | 284                       | 9    | 9        | 24292   | 8.58  | 1695   | 929.4724 | 2785.935 | 3                            | 2785.936 | -0.0003  | 0       | 56.49 | 7.70E-05 | K        | TGGPYDVLVPLGGNLAGNLSSEPM@VK | E            |   |
|        |                                       |                           |      |          |         |       | 404    | 493.7842 | 985.5538 | 2                            | 985.5556 | -0.0018  | 1       | 46.94 | 0.0031   | K        | AKLEQLR                     | E            |   |
|        |                                       |                           |      |          |         |       | 439    | 501.7639 | 1001.513 | 2                            | 1001.514 | -0.0009  | 0       | 55.21 | 0.0005   | R        | ALADTEHLR                   | O            |   |
|        |                                       |                           |      |          |         |       | 638    | 543.2757 | 1084.537 | 2                            | 1084.538 | -0.0007  | 0       | 45.75 | 0.0032   | K        | LYVGGFCFK                   | D            |   |
|        |                                       |                           |      |          |         |       | 827    | 578.6759 | 1151.737 | 2                            | 1151.739 | -0.0019  | 0       | 29.45 | 0.0056   | R        | TLRPLVGVYVK                 | O            |   |
|        |                                       |                           |      |          |         |       | 1068   | 629.35   | 1256.686 | 2                            | 1256.686 | -0.0008  | 0       | 82.08 | 6.30E-07 | K        | DLEVLADILEK                 | A            |   |
|        |                                       |                           |      |          |         |       | 1118   | 647.8221 | 1293.63  | 2                            | 1293.631 | -0.0017  | 0       | 45.8  | 0.0037   | K        | EEISNNPHLK                  | S            |   |
|        |                                       |                           |      |          |         |       | 1394   | 877.4554 | 1752.896 | 2                            | 1752.897 | -0.0006  | 0       | 92.98 | 3.40E-08 | K        | SLVEGLVM@TEVIOIK            | E            |   |
|        |                                       |                           |      |          |         |       | 1433   | 933.3554 | 1838.784 | 2                            | 1838.785 | -0.0009  | 0       | 46.17 | 0.0064   | K        | NWNSLDELGHCFK               | E            |   |
|        |                                       |                           |      |          |         |       | 1474   | 672.6548 | 2014.943 | 3                            | 2014.943 | 0        | 0       | 30.99 | 0.042    | K        | FDPYHEALHPTPEVK             | E            |   |
|        |                                       |                           |      |          |         |       | 577    | 530.2874 | 1058.56  | 2                            | 1058.561 | -0.0005  | 0       | 53.01 | 0.00096  | K        | NEELNSLK                    | Y            |   |
|        |                                       |                           |      |          |         |       | 773    | 568.7718 | 1135.529 | 2                            | 1135.53  | -0.0007  | 0       | 58.45 | 0.00018  | R        | NDAIWNFEK                   | F            |   |
|        |                                       |                           |      |          |         |       | 830    | 578.3293 | 1154.644 | 2                            | 1154.645 | -0.0007  | 0       | 43.04 | 0.0034   | K        | FLVGPDPVPR                  | R            |   |
|        |                                       |                           |      |          |         |       | 831    | 738.3297 | 1154.645 | 2                            | 1154.645 | -0.0001  | 0       | 51.12 | 0.00053  | K        | FLVGGVGVYK                  | R            |   |
|        |                                       |                           |      |          |         |       | 1066   | 628.7764 | 1255.538 | 2                            | 1255.539 | -0.0009  | 0       | 32.83 | 0.026    | R        | DYTEMNDLQK                  | R            |   |
| 1092   | 636.7736                              | 1271.533                  | 2    | 1271.534 | -0.0014 | 0     | 37.45  | 0.0059   | R        | DYTEM@NDLQK                  | R        |          |         |       |          |          |                             |              |   |
| 1444   | 942.456                               | 1882.897                  | 2    | 1882.898 | -0.0008 | 0     | 51.17  | 0.00053  | R        | NALPTPSDDPTALMTDPK           | Y        |          |         |       |          |          |                             |              |   |
| 1447   | 950.4537                              | 1898.893                  | 2    | 1898.893 | -0.0004 | 0     | 51.63  | 0.00046  | R        | NALPTPSDDPTALMTDPK           | Y        |          |         |       |          |          |                             |              |   |
| 1496   | 1030.506                              | 2058.997                  | 2    | 2058.996 | 0.001   | 0     | 76.33  | 1.50E-06 | R        | TIDEPDTELLSQSSGNS            | -        |          |         |       |          |          |                             |              |   |
| 1247   | 499.2559                              | 1494.746                  | 3    | 1494.747 | -0.0009 | 0     | 49.23  | 0.00094  | K        | IFPVVGGVSGK                  | G        |          |         |       |          |          |                             |              |   |
| 1259   | 770.3748                              | 1538.735                  | 2    | 1538.737 | -0.0014 | 0     | 81.21  | 7.90E-07 | K        | YGYYTLSTGDLLR                | A        |          |         |       |          |          |                             |              |   |
| 1296   | 793.9268                              | 1585.839                  | 2    | 1585.839 | -0.0005 | 0     | 73.76  | 3.10E-06 | K        | VDSSNGFLIDGIVPR              | E        |          |         |       |          |          |                             |              |   |
| 1679   | 859.0912                              | 2574.252                  | 3    | 2574.252 | -0.0004 | 1     | 40.53  | 0.0037   | R        | GELVPLDTL@MLR                | D        |          |         |       |          |          |                             |              |   |
|        |                                       |                           |      |          |         |       |        |          |          |                              |          |          |         |       |          |          |                             |              |   |
| 77     | P17751                                | Triosephosphate isomerase | 2707 | 74       | 21      | 26696 | 6.9    | 115      | 425.7388 | 849.459                      | 2        | 849.4596 | -0.0006 | 0     | 42.55    | 0.0085   | K                           | VVEFQTK      | V |
|        |                                       |                           |      |          |         |       |        | 417      | 475.3742 | 849.459                      | 2        | 849.4596 | -0.0003 | 0     | 41.83    | 0.0003   | K                           | VVEFQTK      | V |
|        |                                       |                           |      |          |         |       |        | 248      | 477.4525 | 953.4758                     | 2        | 953.476  | -0.0001 | 0     | 47.85    | 0.0021   | K                           | FFVGGNWK     | M |
|        |                                       |                           |      |          |         |       |        | 459      | 541.7925 | 1081.571                     | 2        | 1081.571 | -0.0004 | 1     | 33.78    | 0.041    | R                           | KFFVGGNWK    | M |
|        |                                       |                           |      |          |         |       |        | 551      | 569.289  | 1136.564                     | 2        | 1136.565 | -0.0014 | 0     | 52.39    | 0.00093  | K                           | IAVAQNC@YK   | V |
|        |                                       |                           |      |          |         |       |        | 552      | 569.2891 | 1136.564                     | 2        | 1136.565 | -0.0012 | 0     | 49.06    | 0.002    | K                           | IAVAQNC@YK   | V |
|        |                                       |                           |      |          |         |       |        | 553      | 569.2891 | 1136.564                     | 2        | 1136.565 | -0.0012 | 0     | 43.01    | 0.008    | K                           | IAVAQNC@YK   | V |
|        |                                       |                           |      |          |         |       |        | 556      | 569.2896 | 1136.565                     | 2        | 1136.565 | -0.0001 | 0     | 52.16    | 0.00086  | K                           | IAVAQNC@YK   | V |
|        |                                       |                           |      |          |         |       |        | 733      | 624.3011 | 1246.588                     | 2        | 1246.59  | -0.0025 | 0     | 66.83    | 2.00E-05 | K                           | SNVNDGVAQSTR | I |
|        |                                       |                           |      |          |         |       |        | 734      | 624.3018 | 1246.589                     | 2        | 1246.59  | -0.0015 | 0     | 66.53    | 2.30E-05 | K                           | SNVNDGVAQSTR | I |
|        |                                       |                           |      |          |         |       |        | 735      | 624.3021 | 1246.59                      | 2        | 1246.59  | -0.0006 | 0     | 55.72    | 0.00028  | K                           | SNVNDGVAQSTR | I |
|        |                                       |                           |      |          |         |       |        | 736      | 624.3022 | 1246.59                      | 2        | 1246.59  | -0.0003 | 0     | 50.86    | 0.00084  | K                           | SNVNDGVAQSTR | I |
|        |                                       |                           |      |          |         |       |        | 777      | 637.8402 | 1273.666                     | 2        | 1273.667 | -0.0008 | 1     | 52.99    | 0.00067  | K                           | VIADNKDWSK   | I |
|        |                                       |                           |      |          |         |       |        | 841      | 663.839  | 1325.663                     | 2        | 1325.665 | -0.0015 | 0     | 73.26    | 5.00E-06 | R                           | IYGGVGTGAT@K | E |
|        |                                       |                           |      |          |         |       |        | 842      | 663.8394 | 1325.664                     | 2        | 1325.665 | -0.0008 | 0     | 77.87    | 1.70E-06 | R                           | IYGGVGTGAT@K | E |
| 844    | 663.8394                              | 1325.664                  | 2    | 1325.665 | -0.0007 | 0     | 86.28  | 2.40E-07 | R        | IYGGVGTGAT@K                 | E        |          |         |       |          |          |                             |              |   |
| 845    | 663.8394                              | 1325.664                  | 2    | 1325.665 | -0.0007 | 0     | 78.52  | 1.40E-06 | R        | IYGGVGTGAT@K                 | E        |          |         |       |          |          |                             |              |   |
| 846    | 442.8954                              | 1325.664                  | 3    | 1325.665 | -0.0006 | 0     | 34.61  | 0.035    | R        | IYGGVGTGAT@K                 | E        |          |         |       |          |          |                             |              |   |
| 847    | 663.8395                              | 1325.665                  | 2    | 1325.665 | -0.0004 | 0     | 90.72  | 8.70E-08 | R        | IYGGVGTGAT@K                 | E        |          |         |       |          |          |                             |              |   |
| 848    | 663.8397                              | 1325.665                  | 2    | 1325.665 | -0.0002 | 0     | 89.62  | 1.40E-07 | R        | IYGGVGTGAT@K                 | E        |          |         |       |          |          |                             |              |   |
| 851    | 663.8398                              | 1325.665                  | 2    | 1325.665 | -0.0002 | 0     | 64.76  | 3.30E-06 | R        | IYGGVGTGAT@K                 | E        |          |         |       |          |          |                             |              |   |
| 852    | 663.8399                              | 1325.665                  | 2    | 1325.665 | 0.0003  | 0     | 103.62 | 4.20E-09 | R        | IYGGVGTGAT@K                 | E        |          |         |       |          |          |                             |              |   |
| 853    | 663.8403                              | 1325.666                  | 2    | 1325.665 | 0.001   | 0     | 61.11  | 7.20E-05 | R        | IYGGVGTGAT@K                 | E        |          |         |       |          |          |                             |              |   |
| 972    | 486.912                               | 1457.714                  | 3    | 1457.715 | -0.0009 | 0     | 52.55  | 0.00052  | R        | HVFGSELDLQK                  | V        |          |         |       |          |          |                             |              |   |
| 974    | 729.8646                              | 1457.715                  | 2    | 1457.715 | -0.0004 | 0     | 58.04  | 0.00014  | R        | HVFGSELDLQK                  | V        |          |         |       |          |          |                             |              |   |
| 975    | 729.8646                              | 1457.715                  | 2    | 1457.715 | -0.0004 | 0     | 70.46  | 8.10E-06 | R        | HVFGSELDLQK                  | V        |          |         |       |          |          |                             |              |   |
| 979    | 729.8653                              | 1457.716                  | 2    | 1457.715 | 0.001   | 0     | 69.62  | 9.10E-06 | R        | HVFGSELDLQK                  | V        |          |         |       |          |          |                             |              |   |
| 985    | 733.8638                              | 1465.713                  | 2    | 1465.716 | -0.003  | 0     | 66.56  | 2.30E-05 | K        | TATPQQAQVEHEK                | L        |          |         |       |          |          |                             |              |   |
| 991    | 733.8647                              | 1465.715                  | 2    | 1465.716 | -0.0013 | 0     | 45.22  | 0.0035   | K        | TATPQQAQVEHEK                | L        |          |         |       |          |          |                             |              |   |
| 993    | 733.8647                              | 1465.715                  | 2    | 1465.716 | -0.0013 | 0     | 63.69  | 4.90E-05 | K        | TATPQQAQVEHEK                | L        |          |         |       |          |          |                             |              |   |
| 995    | 733.8651                              | 1465.716                  | 2    | 1465.716 | -0.0004 | 0     | 54.14  | 0.00045  | K        | TATPQQAQVEHEK                | L        |          |         |       |          |          |                             |              |   |
| 996    | 733.8653                              | 1465.716                  | 2    | 1465.716 | -0.0001 | 0     | 35.83  | 0.029    | K        | TATPQQAQVEHEK                | L        |          |         |       |          |          |                             |              |   |
| 1079   | 513.935                               | 1538.783                  | 3    | 1538.784 | -0.001  | 0     | 36.55  | 0.021    | K        | DLGATWVVLGHSEK               | R        |          |         |       |          |          |                             |              |   |
| 1080   | 513.9351                              | 1538.783                  | 3    | 1538.784 | -0.0008 | 0     | 60.2   | 8.90E-05 | K        | DLGATWVVLGHSEK               | R        |          |         |       |          |          |                             |              |   |
| 1081   | 770.399                               | 1538.783                  | 3    | 1538.784 | -0.0007 | 0     | 79.36  | 1.10E-06 | K        | DLGATWVVLGHSEK               | R        |          |         |       |          |          |                             |              |   |
| 1082   | 513.9351                              | 1538.784                  | 3    | 1538.784 | -0.0006 | 0     | 48.09  | 0.0014   | K        | DLGATWVVLGHSEK               | R        |          |         |       |          |          |                             |              |   |
| 1083   | 513.9352                              | 1538.784                  | 3    | 1538.784 | -0.0004 | 0     | 42.92  | 0.0047   | K        | DLGATWVVLGHSEK               | R        |          |         |       |          |          |                             |              |   |
| 1084   | 770.3992                              | 1538.784                  | 3    | 1538.784 | -0.0002 | 0     | 90.1   | 8.80E-08 | K        | DLGATWVVLGHSEK               | R        |          |         |       |          |          |                             |              |   |
| 1144   | 533.6242                              | 1598.891                  | 3    | 1598.893 | -0.0016 | 0     | 33.61  | 0.019    | K        | VVLYEPVWIAIGTK               | T        |          |         |       |          |          |                             |              |   |
| 1148   | 534.9673                              | 1601.88                   | 3    | 1601.882 | -0.0015 | 0     | 53.19  | 0.00024  | K        | VVLYEPVWIAIGTK               | T        |          |         |       |          |          |                             |              |   |
| 1150   | 534.9677                              | 1601.881                  | 3    | 1601.882 | -0.0004 | 0     | 76.12  | 1.10E-06 | K        | VVLYEPVWIAIGTK               | T        |          |         |       |          |          |                             |              |   |
| 1151   | 534.9678                              | 1601.882                  | 3    | 1601.882 | -0.0002 | 0     | 34.76  | 0.015    | K        | VVLYEPVWIAIGTK               | T        |          |         |       |          |          |                             |              |   |
| 1153   | 801.9483                              | 1601.882                  | 3    | 1601.882 | 0.0003  | 0     | 94.66  | 1.40E-08 | K        | VVLYEPVWIAIGTK               | T        |          |         |       |          |          |                             |              |   |
| 1154   | 801.9484                              | 1601.882                  | 3    | 1601.882 | 0.0004  | 0     | 96.2   | 9.00E-09 | K        | VVLYEPVWIAIGTK               | T        |          |         |       |          |          |                             |              |   |
| 1155   | 801.9489                              | 1601.883                  | 3    | 1601.882 | 0.0014  | 0     | 96.37  | 1.00E-08 | K        | VVLYEPVWIAIGTK               | T        |          |         |       |          |          |                             |              |   |
| 1169   | 538.945                               | 1613.813                  | 3    | 1613.816 | -0.003  | 1     | 64.04  | 3.30E-05 | R        | RHVFGSELDLQK                 | V        |          |         |       |          |          |                             |              |   |
| 1170   | 538.945                               | 1613.813                  | 3    | 1613.816 | -0.003  | 1     | 45.64  | 0.0023   | R        | RHVFGSELDLQK                 | V        |          |         |       |          |          |                             |              |   |
| 1171   | 538.9454                              | 1613.815                  | 3    | 1613.816 | -0.001  | 0     | 46.79  | 0.002    | R        | RHVFGSELDLQK                 | V        |          |         |       |          |          |                             |              |   |
| 1172   | 538.9456                              | 1613.815                  | 3    | 1613.816 | -0.0011 | 1     | 38.33  | 0.013    | R        | RHVFGSELDLQK                 | V        |          |         |       |          |          |                             |              |   |
| 1197   | 541.2799                              | 1620.818                  | 3    | 1620.818 | -0.0003 | 0     | 41     | 0.0075   | K        | VTNGAFTGEISPGMK              | D        |          |         |       |          |          |                             |              |   |
| 1198   | 811.4163                              | 1620.818                  | 3    | 1620.818 | -0.0001 | 0     | 65.56  | 2.60E-05 | K        | VTNGAFTGEISPGMK              | D        |          |         |       |          |          |                             |              |   |
| 1199   | 811.4166                              | 1620.818                  | 3    | 1620.818 | 0.0004  | 0     | 93.09  | 4.50E-08 | K        | VTNGAFTGEISPGMK              | D        |          |         |       |          |          |                             |              |   |
| 1223   | 819.4135                              | 1636.812                  | 3    | 1636.813 | -0.0007 | 0     | 41.51  | 0.0069   | K        | VTNGAFTGEISPGMK@IK           | D        |          |         |       |          |          |                             |              |   |
| 1224   | 819.4135                              | 1636.812                  | 3    | 1636.813 | -0.0006 | 0     | 93.68  | 4.30E-08 | K        | VTNGAFTGEISPGMK@IK           | D        |          |         |       |          |          |                             |              |   |
| 1225   | 546.6116                              | 1636.813                  | 3    | 1636.813 | -0.0002 | 0     | 83.55  | 4.40E-07 | K        | VTNGAFTGEISPGMK@IK           | D        |          |         |       |          |          |                             |              |   |
| 1226   | 819.4144                              | 1636.814                  | 3    | 1636.813 | 0.0011  | 0     | 71.41  | 6.60E-06 | K        | VTNGAFTGEISPGMK@IK           | D        |          |         |       |          |          |                             |              |   |
| 1300   | 565.9686                              | 1694.884                  | 3    | 1694.885 | -0.0012 | 0     | 31.87  | 0.043    | K        | DLGATWVVLGHSEK               | H        |          |         |       |          |          |                             |              |   |
| 1341   | 434.7325                              | 1734.901                  | 4    | 1734.901 | -0.0003 | 1     | 47.75  | 0.0013   | K        | TATPQQAQVEHEKLR              | G        |          |         |       |          |          |                             |              |   |
| 1440   | 912.4872                              | 1822.96                   | 2    | 1822.961 | -0.0013 | 0     | 97.7   | 9.60E-09 | K        | VSHALAEGLGIAC@I@GEK          | L        |          |         |       |          |          |                             |              |   |
| 1441   | 608.6607                              | 1822.96                   | 3    | 1822.961 | -0.0008 | 0     | 34.92  | 0.018    | K        | VSHALAEGLGIAC@I@GEK          | L        |          |         |       |          |          |                             |              |   |
| 1442   | 608.6608                              | 1822.961                  | 3    | 1822.961 | -0.0004 | 0     | 45.62  | 0.0015   | K        | VSHALAEGLGIAC@I@GEK          | L        |          |         |       |          |          |                             |              |   |
| 1444   | 912.4878                              | 1822.961                  | 2    | 1822.961 | -0.0001 | 0     | 100.52 | 4.70E-02 | K        | VSHALAEGLGIAC@I@GEK          | L        |          |         |       |          |          |                             |              |   |
| 1445   | 608.661                               | 1822.961                  | 3    | 1822.961 | 0.0001  | 0     | 38.73  | 0.0072   | K        | VSHALAEGLGIAC@I@GEK          | L        |          |         |       |          |          |                             |              |   |
| 1658   | 585.0598                              | 2336.21                   | 4    | 2336.216 | -0.0056 | 1     | 32.78  | 0.019    | K        | VSHALAEGLGIAC@I@GKELDER      | E        |          |         |       |          |          |                             |              |   |
| 1720   | 1010.533                              | 3028.576                  | 3    | 3028.576 | -0.0027 | 0     | 46.99  | 0.00045  | K        | ELASQPDVDGFLVGGASLKPFEVDINAK | O        |          |         |       |          |          |                             |              |   |
| 1722   | 1010.533                              | 3028.576                  | 3    | 3028.576 | -0.0009 | 0     | 39.16  | 0.0029   | K        | ELASQPDVDGFLVGGASLKPFEVDINAK | O        |          |         |       |          |          |                             |              |   |
| 1723   | 758.1512                              | 3028.576                  | 4    | 3028.576 | -0.0001 | 0     | 54.1   | 9.20E-05 | K        | ELASQPDVDGFLVGGASLKP         |          |          |         |       |          |          |                             |              |   |

|        |                                |                                    |          |         |       |        |          |                              |          |          |          |         |       |          |                        |                              |   |
|--------|--------------------------------|------------------------------------|----------|---------|-------|--------|----------|------------------------------|----------|----------|----------|---------|-------|----------|------------------------|------------------------------|---|
| P15626 | Glutathione S-transferase Mu 2 | 310                                | 10       | 9       | 25700 | 6.9    | 1010     | 730.886                      | 2189.036 | 2189.034 | 0.0017   | 0       | 71.34 | 3.90E-06 | NVVSQFVSM@SASADVLAM@SK | I                            |   |
|        |                                |                                    |          |         |       |        | 367      | 508.298                      | 1014.582 | 1014.582 | -0.0007  | 0       | 87.96 | 2.30E-07 | ITQSNAILR              | I                            |   |
|        |                                |                                    |          |         |       |        | 368      | 508.298                      | 1014.582 | 1014.582 | -0.0008  | 0       | 60.06 | 0.0011   | ITQSNAILR              | Y                            |   |
|        |                                |                                    |          |         |       |        | 438      | 525.821                      | 1049.627 | 1049.627 | 0.0001   | 0       | 31.76 | 0.018    | FLSKPFAK               | Y                            |   |
|        |                                |                                    |          |         |       |        | 753      | 652.266                      | 1302.518 | 1302.519 | -0.0003  | 0       | 53.89 | 6.70E-05 | YTM@GDAPDYDR           | M                            |   |
|        |                                |                                    |          |         |       |        | 770      | 660.2636                     | 1318.513 | 1318.514 | -0.0009  | 0       | 45.79 | 0.0002   | YTM@GDAPDYDR           | S                            |   |
|        |                                |                                    |          |         |       |        | 806      | 702.8431                     | 1403.672 | 1403.672 | 0.0001   | 0       | 68.45 | 1.30E-05 | VDILENGAMDR            | I                            |   |
|        |                                |                                    |          |         |       |        | 863      | 795.3825                     | 1588.751 | 1588.751 | -0.0003  | 0       | 45.2  | 0.0025   | LLLEVTDTSYEDK          | K                            |   |
|        |                                |                                    |          |         |       |        | 892      | 563.8578                     | 1038.852 | 1038.852 | 0.0001   | 0       | 33.95 | 0.038    | RVID@VAMDR             | I                            |   |
|        |                                |                                    |          |         |       |        | 905      | 858.9031                     | 1715.792 | 1715.79  | 0.0017   | 0       | 74.58 | 2.10E-06 | IQLAM@VC@YSPDFEK       | K                            |   |
|        |                                |                                    |          |         |       |        | 963      | 633.6722                     | 1897.935 | 1897.994 | 0.0011   | 0       | 32.2  | 0.032    | LGLDFPNLPLYDGSKH       | I                            |   |
|        |                                |                                    |          |         |       |        | 232      | 447.7738                     | 893.5331 | 893.5334 | -0.0004  | 0       | 49.15 | 0.00034  | VIGIDHK                | E                            |   |
|        |                                |                                    |          |         |       |        | 500      | 553.7608                     | 1105.507 | 1105.507 | -0.0003  | 0       | 39.67 | 0.013    | DDPM@LLSSGR            | I                            |   |
|        |                                |                                    |          |         |       |        | 619      | 590.8054                     | 1170.596 | 1170.596 | 0.0004   | 0       | 46.02 | 0.0032   | VFEV@LATDR             | S                            |   |
|        |                                |                                    |          |         |       |        | 648      | 598.8028                     | 1195.591 | 1195.591 | 0.0003   | 0       | 68.77 | 1.40E-05 | VFEV@LATDR             | S                            |   |
| 691    | 616.8223                       | 1231.631                           | 1231.63  | 0.0004  | 0     | 57.93  | 0.00024  | ELVDSDITNVK                  | K        |          |          |         |       |          |                        |                              |   |
| 836    | 493.255                        | 1476.743                           | 1476.743 | -0.0002 | 0     | 42.32  | 0.007    | SGGASHSELIHLNLF              | K        |          |          |         |       |          |                        |                              |   |
| 894    | 517.9309                       | 1033.947                           | 1033.946 | 0.0015  | 0     | 73.43  | 4.30E-06 | ALDVGSSGILTAC@FAR            | M        |          |          |         |       |          |                        |                              |   |
| 916    | 579.6495                       | 1325.927                           | 1325.925 | 0.0015  | 0     | 31.05  | 0.044    | M@KPLM@GVIVPLTDK             | E        |          |          |         |       |          |                        |                              |   |
| 1000   | 1030.03                        | 2058.046                           | 2058.046 | 0.0002  | 0     | 85.83  | 1.40E-07 | LILPVG@PAGGNOM@LEQYDK        | L        |          |          |         |       |          |                        |                              |   |
| 668    | 606.3041                       | 1210.594                           | 1210.594 | -0.0005 | 0     | 75.11  | 4.20E-06 | LQDVTDHHR                    | M        |          |          |         |       |          |                        |                              |   |
| 669    | 404.5388                       | 1210.594                           | 1210.594 | -0.0002 | 0     | 48.85  | 0.0017   | LQDVTDHHR                    | M        |          |          |         |       |          |                        |                              |   |
| 924    | 586.3148                       | 1755.925                           | 1755.927 | -0.0002 | 0     | 55.95  | 0.00017  | LPSEGGPQPAHV@VGDVR           | O        |          |          |         |       |          |                        |                              |   |
| 925    | 878.9713                       | 1755.928                           | 1755.927 | 0.0013  | 0     | 56.35  | 0.00015  | LPSEGGPQPAHV@VGDVR           | O        |          |          |         |       |          |                        |                              |   |
| 1073   | 767.9834                       | 2300.928                           | 2300.928 | 0.0003  | 0     | 35.05  | 0.0028   | C@LTTNEDYDGH@YTPSHQVD        | -        |          |          |         |       |          |                        |                              |   |
| 1103   | 896.4651                       | 2686.344                           | 2686.343 | 0.0011  | 0     | 59.95  | 3.80E-05 | YVAVM@BPHHIDQPLT@GAY@VTLDR   | G        |          |          |         |       |          |                        |                              |   |
| 1105   | 578.1691                       | 2331.485                           | 2332.486 | -0.0006 | 0     | 63.84  | 1.10E-05 | TVAG@AVLLTGTN@LSPFTVM@SEGR   | M        |          |          |         |       |          |                        |                              |   |
| 447    | 529.2988                       | 1056.586                           | 1056.586 | -0.0005 | 0     | 43.26  | 0.0066   | K@LFFNIDK                    | M        |          |          |         |       |          |                        |                              |   |
| 634    | 596.3403                       | 1190.666                           | 1190.666 | 0.0002  | 0     | 35.96  | 0.019    | LSLIPYAT@TGR                 | N        |          |          |         |       |          |                        |                              |   |
| 801    | 698.3324                       | 1394.65                            | 1394.65  | 0.0002  | 0     | 41.2   | 0.0065   | DFT@V@TTELGR                 | A        |          |          |         |       |          |                        |                              |   |
| 824    | 726.3361                       | 1450.658                           | 1450.658 | 0       | 0     | 45.23  | 0.0019   | DINAYNETPTEK                 | L        |          |          |         |       |          |                        |                              |   |
| 848    | 771.9268                       | 1541.839                           | 1541.838 | 0.0015  | 0     | 34.18  | 0.027    | D@L@L@M@L@D@V@E@K            | D        |          |          |         |       |          |                        |                              |   |
| 80     | P49722                         | Proteasome subunit alpha type-2    | 538      | 17      | 9     | 25882  | 6.92     | 475                          | 536.8027 | 1071.591 | 1071.592 | -0.0016 | 0     | 62.47    | 8.30E-05               | AANGV@LATEK                  | K |
|        |                                |                                    |          |         |       |        |          | 556                          | 569.335  | 1136.655 | 1136.655 | 0       | 1     | 51.22    | 0.00034                | SVHK@EPTK                    | H |
|        |                                |                                    |          |         |       |        |          | 649                          | 400.8029 | 1189.687 | 1189.687 | -0.0006 | 1     | 34.64    | 0.028                  | AANGV@LATEK                  | Q |
|        |                                |                                    |          |         |       |        |          | 786                          | 739.8624 | 1477.71  | 1477.709 | 0.0013  | 0     | 71.11    | 8.50E-06               | GYS@S@LTF@SPSGK              | L |
|        |                                |                                    |          |         |       |        |          | 787                          | 739.8625 | 1477.71  | 1477.709 | 0.0015  | 0     | 58       | 0.00018                | GYS@S@LTF@SPSGK              | L |
|        |                                |                                    |          |         |       |        |          | 802                          | 522.257  | 1563.749 | 1563.75  | -0.0012 | 0     | 39.46    | 0.011                  | HIGLV@SGM@PDYR               | V |
|        |                                |                                    |          |         |       |        |          | 807                          | 527.589  | 1579.745 | 1579.745 | -0.0002 | 0     | 60.21    | 7.60E-05               | HIGLV@SGM@PDYR               | V |
|        |                                |                                    |          |         |       |        |          | 839                          | 527.592  | 1579.746 | 1579.745 | 0.0004  | 0     | 53.97    | 0.00037                | HIGLV@SGM@PDYR               | V |
|        |                                |                                    |          |         |       |        |          | 810                          | 790.8801 | 1579.746 | 1579.745 | 0.0004  | 0     | 44.08    | 0.0032                 | HIGLV@SGM@PDYR               | V |
|        |                                |                                    |          |         |       |        |          | 920                          | 1014.08  | 2026.146 | 2026.146 | -0.0004 | 0     | 72.57    | 6.60E-07               | LV@EY@A@A@V@G@A@P@S@V@G@I    | A |
|        |                                |                                    |          |         |       |        |          | 922                          | 676.3895 | 2026.147 | 2026.146 | 0.0003  | 0     | 70.77    | 9.30E-07               | LV@EY@A@A@V@G@A@P@S@V@G@I    | A |
|        |                                |                                    |          |         |       |        |          | 923                          | 676.3895 | 2026.147 | 2026.146 | 0.0003  | 0     | 55.82    | 2.90E-05               | LV@EY@A@A@V@G@A@P@S@V@G@I    | A |
|        |                                |                                    |          |         |       |        |          | 924                          | 1014.081 | 2026.147 | 2026.146 | 0.0003  | 0     | 39.01    | 0.0013                 | LV@EY@A@A@V@G@A@P@S@V@G@I    | A |
|        |                                |                                    |          |         |       |        |          | 952                          | 734.383  | 2200.127 | 2200.126 | 0.0009  | 0     | 42.88    | 0.0028                 | YNE@D@L@E@D@H@T@L@T@L@K      | E |
|        |                                |                                    |          |         |       |        |          | 1064                         | 1261.175 | 2520.336 | 2520.338 | -0.0016 | 0     | 49.94    | 0.00024                | LA@Q@Y@L@V@E@P@I@P@T@Q@L@V@R | R |
| 1065   | 841.1194                       | 2520.337                           | 2520.338 | -0.0011 | 0     | 45.09  | 0.00072  | LA@Q@Y@L@V@E@P@I@P@T@Q@L@V@R | R        |          |          |         |       |          |                        |                              |   |
| 1066   | 841.1201                       | 2520.338                           | 2520.338 | 0.0009  | 0     | 45.8   | 0.00057  | LA@Q@Y@L@V@E@P@I@P@T@Q@L@V@R | R        |          |          |         |       |          |                        |                              |   |
| 1083   | 493.7233                       | 997.4501                           | 997.4505 | -0.0004 | 0     | 40.83  | 0.007    | V@P@D@S@YR                   | V        |          |          |         |       |          |                        |                              |   |
| 814    | 793.9045                       | 1585.794                           | 1585.795 | -0.0003 | 0     | 34.89  | 0.029    | EID@E@A@E@V@S@Q@L@R          | D        |          |          |         |       |          |                        |                              |   |
| 815    | 529.6055                       | 1585.795                           | 1585.795 | 0       | 0     | 71.14  | 6.80E-06 | EID@E@A@E@V@S@Q@L@R          | D        |          |          |         |       |          |                        |                              |   |
| 816    | 793.9048                       | 1585.795                           | 1585.795 | 0.0004  | 0     | 69.44  | 9.30E-06 | EID@E@A@E@V@S@Q@L@R          | D        |          |          |         |       |          |                        |                              |   |
| 817    | 793.9053                       | 1585.796                           | 1585.795 | 0.0013  | 0     | 115.48 | 6.0E-10  | EID@E@A@E@V@S@Q@L@R          | D        |          |          |         |       |          |                        |                              |   |
| 846    | 857.952                        | 1713.89                            | 1713.89  | -0.0002 | 1     | 61.24  | 6.30E-05 | KEID@E@A@E@V@S@Q@L@R         | D        |          |          |         |       |          |                        |                              |   |
| 847    | 572.3038                       | 1713.89                            | 1713.89  | 0       | 1     | 43.2   | 0.004    | KEID@E@A@E@V@S@Q@L@R         | D        |          |          |         |       |          |                        |                              |   |
| 941    | 725.3541                       | 2173.04                            | 2173.04  | 0.0009  | 0     | 55.81  | 0.00015  | NVVSQFVSM@SASADVLAM@SK       | I        |          |          |         |       |          |                        |                              |   |
| 945    | 730.855                        | 2189.035                           | 2189.034 | 0.0004  | 0     | 94.16  | 2.10E-08 | NVVSQFVSM@SASADVLAM@SK       | I        |          |          |         |       |          |                        |                              |   |
| 947    | 1095.526                       | 2189.037                           | 2189.034 | 0.0025  | 0     | 87.05  | 1.10E-07 | NVVSQFVSM@SASADVLAM@SK       | I        |          |          |         |       |          |                        |                              |   |
| 624    | 590.8057                       | 1179.597                           | 1179.596 | 0.001   | 0     | 46.21  | 0.003    | VFEV@LATDR                   | S        |          |          |         |       |          |                        |                              |   |
| 647    | 598.8027                       | 1195.591                           | 1195.591 | 0.0002  | 0     | 65.78  | 2.80E-05 | VFEV@LATDR                   | S        |          |          |         |       |          |                        |                              |   |
| 682    | 616.8221                       | 1231.63                            | 1231.63  | 0.0001  | 0     | 55.13  | 0.00045  | ELVDSDITNVK                  | K        |          |          |         |       |          |                        |                              |   |
| 785    | 625.2545                       | 1476.742                           | 1476.743 | -0.0018 | 0     | 57.97  | 0.00022  | SGGASHSELIHLNLF              | K        |          |          |         |       |          |                        |                              |   |
| 838    | 847.9297                       | 1693.845                           | 1693.846 | -0.0009 | 0     | 93.43  | 4.50E-08 | ALDVGSSGILTAC@FAR            | M        |          |          |         |       |          |                        |                              |   |
| 855    | 579.649                        | 1735.925                           | 1735.925 | 0.0001  | 0     | 33.58  | 0.026    | M@KPLM@GVIVPLTDK             | E        |          |          |         |       |          |                        |                              |   |
| 938    | 1030.031                       | 2058.046                           | 2058.046 | 0.0021  | 0     | 59.4   | 9.90E-05 | LILPVG@PAGGNOM@LEQYDK        | L        |          |          |         |       |          |                        |                              |   |
| 944    | 441.2419                       | 2026.147                           | 2026.146 | -0.0007 | 0     | 35.14  | 0.05     | K                            | L        |          |          |         |       |          |                        |                              |   |
| 662    | 606.3032                       | 1210.592                           | 1210.594 | -0.0024 | 0     | 61.26  | 9.40E-05 | LQDVTDHHR                    | M        |          |          |         |       |          |                        |                              |   |
| 663    | 404.5383                       | 1210.593                           | 1210.594 | -0.0011 | 0     | 50.67  | 0.0011   | LQDVTDHHR                    | M        |          |          |         |       |          |                        |                              |   |
| 860    | 586.3156                       | 1755.925                           | 1755.927 | -0.0018 | 0     | 49.62  | 0.00076  | LPSEGGPQPAHV@VGDVR           | O        |          |          |         |       |          |                        |                              |   |
| 1071   | 896.4457                       | 2686.342                           | 2686.343 | -0.0002 | 0     | 69.88  | 4.10E-06 | YVAVM@BPHHIDQPLT@GAY@VTLDR   | G        |          |          |         |       |          |                        |                              |   |
| 1076   | 978.17                         | 2931.486                           | 2931.486 | 0.0024  | 0     | 59.78  | 2.90E-06 | TVAG@AVLLTGTN@LSPFTVM@SEGR   | M        |          |          |         |       |          |                        |                              |   |
| 341    | 455.2443                       | 988.474                            | 988.476  | -0.002  | 3     | 35.33  | 0.042    | NC@VAIADR                    | R        |          |          |         |       |          |                        |                              |   |
| 827    | 815.4014                       | 1628.788                           | 1628.787 | 0.0014  | 0     | 68.54  | 1.20E-05 | FGIOAQM@VTTDFQK              | I        |          |          |         |       |          |                        |                              |   |
| 862    | 883.9537                       | 1765.893                           | 1765.893 | 0.0001  | 0     | 38.79  | 0.0095   | FGPY@TEP@I@L@D@P@K           | T        |          |          |         |       |          |                        |                              |   |
| 893    | 630.3542                       | 1888.041                           | 1888.042 | -0.0011 | 0     | 63.09  | 1.20E-05 | LY@L@G@L@D@V@T@Q@V@A@Q@R     | L        |          |          |         |       |          |                        |                              |   |
| 81     | Q8BH95                         | Enoyl-CoA hydratase, mitochondrial | 1023     | 29      | 17    | 31454  | 8.76     | 162                          | 432.2345 | 862.4545 | 862.4548 | -0.0003 | 0     | 57.15    | 0.00039                | AFAAGADIK                    | E |
|        |                                |                                    |          |         |       |        |          | 163                          | 432.2348 | 862.4551 | 862.4548 | 0.0002  | 0     | 52.43    | 0.0011                 | AFAAGADIK                    | E |
|        |                                |                                    |          |         |       |        |          | 379                          | 506.2442 | 1010.474 | 1010.474 | -0.0004 | 0     | 54.67    | 0.0004                 | EGMT@F@V@E@K                 | R |
|        |                                |                                    |          |         |       |        |          | 595                          | 505.2391 | 1134.464 | 1134.465 | 0.00015 | 0     | 45.56    | 0.00057                | T@E@Q@Y@S@K                  | F |
|        |                                |                                    |          |         |       |        |          | 669                          | 584.2841 | 1166.574 | 1166.575 | -0.0017 | 1     | 42.05    | 0.0094                 | EGMT@F@V@E@K                 | K |
|        |                                |                                    |          |         |       |        |          | 832                          | 645.3232 | 1288.632 | 1288.633 | -0.0013 | 0     | 59       | 0.00015                | LVEE@I@C@A@E@K               | I |
|        |                                |                                    |          |         |       |        |          | 833                          | 645.3238 | 1288.633 | 1288.633 | -0.0002 | 0     | 67.71    | 2.10E-05               | LVEE@I@C@A@E@K               | I |
|        |                                |                                    |          |         |       |        |          | 893                          | 661.8256 | 1321.637 | 1321.637 | -0.0003 | 0     | 64.01    | 5.00E-05               | SLAM@EM@VLTGDR               | I |
|        |                                |                                    |          |         |       |        |          | 894                          | 661.8262 | 1321.638 | 1321.637 | 0.0008  | 0     | 60.09    | 0.00018                | SLAM@EM@VLTGDR               | I |
|        |                                |                                    |          |         |       |        |          | 907                          | 668.3145 | 1334.614 | 1334.614 | 0.0001  | 0     | 75.79    | 2.00E-06               | LFYST@F@T@D@R                | R |
|        |                                |                                    |          |         |       |        |          | 908                          | 668.8226 | 1337.631 | 1337.632 | -0.0012 | 0     | 47.4     | 0.0021                 | SLAM@EM@VLTGDR               | I |
|        |                                |                                    |          |         |       |        |          | 909                          | 669.8231 | 1337.632 | 1337.632 | -0.0003 | 0     | 65.75    | 2.90E-05               | SLAM@EM@VLTGDR               | I |
|        |                                |                                    |          |         |       |        |          | 937                          | 677.8201 | 1353.626 | 1353.627 | -0.0012 | 0     | 58.73    | 0.00014                | SLAM@EM@VLTGDR               | I |
|        |                                |                                    |          |         |       |        |          | 938                          | 677.8201 | 1353.626 | 1353.627 | -0.0011 | 0     | 66.05    | 2.50E-05               | SLAM@EM@VLTGDR               | I |
|        |                                |                                    |          |         |       |        |          | 939                          | 677.8208 | 1353.627 | 1353.627 | 0.0002  | 0     | 43.59    | 0.0043                 | SLAM@EM@VLTGDR               | I |
| 1000   | 713.4114                       | 1424.808                           | 1424.81  | -0.0016 | 0     | 58.32  | 5.60E-05 | NSSV@G@I@Q@L@N@R@P@K         | A        |          |          |         |       |          |                        |                              |   |
| 1002   | 713.4121                       | 1424.81                            | 1424.81  | -0.0003 | 0     | 62.8   | 1.70E-05 | NSSV@G@I@Q@L@N@R@P@K         | A        |          |          |         |       |          |                        |                              |   |
| 1003   | 713.4122                       | 1424.81                            | 1424.81  | 0       | 0     | 65.24  | 0.06     | NSSV@G@I@Q@L@N@R@P@K         | A        |          |          |         |       |          |                        |                              |   |
| 1056   | 497.9118                       | 1490.714                           | 1490.715 | -0.0019 | 1     | 43.98  | 0.0042   | LFYST@F@T@D@R                | E        |          |          |         |       |          |                        |                              |   |
| 1059   | 746.3647                       | 1490.715                           | 1490.715 | -0.0004 | 1     | 33.86  | 0.041    | LFYST@F@T@D@R                | E        |          |          |         |       |          |                        |                              |   |
| 1087   | 513.2518                       | 1536.734                           | 1536.735 | -0.0018 | 1     | 36.68  | 0.021    | AFAAGADIK@EM@Q@N@R           | T        |          |          |         |       |          |                        |                              |   |
| 1154   | 870.9087                       | 1739.803                           | 1739.804 | -0.00   |       |        |          |                              |          |          |          |         |       |          |                        |                              |   |

|  |  |  |  |  |  |  |  |  |  |      |          |          |   |          |         |   |        |          |   |                                           |   |
|--|--|--|--|--|--|--|--|--|--|------|----------|----------|---|----------|---------|---|--------|----------|---|-------------------------------------------|---|
|  |  |  |  |  |  |  |  |  |  | 1008 | 703.8325 | 1405.651 | 2 | 1405.651 | -0.0003 | 0 | 69.55  | 1.00E-05 | R | ADIVENQVM@DTR                             | M |
|  |  |  |  |  |  |  |  |  |  | 1009 | 703.8328 | 1405.651 | 2 | 1405.651 | 0.0004  | 0 | 40     | 0.0086   | R | ADIVENQVM@DTR                             | M |
|  |  |  |  |  |  |  |  |  |  | 1098 | 797.3525 | 1592.69  | 2 | 1592.692 | -0.0012 | 0 | 82.68  | 2.00E-07 | R | MLLEYTSSSYDEK                             | R |
|  |  |  |  |  |  |  |  |  |  | 1099 | 797.3532 | 1592.692 | 2 | 1592.692 | 0.0003  | 0 | 62.22  | 2.20E-05 | R | MLLEYTSSSYDEK                             | R |
|  |  |  |  |  |  |  |  |  |  | 1107 | 805.3505 | 1608.687 | 2 | 1608.687 | -0.0001 | 0 | 46.67  | 0.00077  | R | M@LLEYTSSSYDEK                            | R |
|  |  |  |  |  |  |  |  |  |  | 1108 | 805.3507 | 1608.687 | 2 | 1608.687 | 0.0004  | 0 | 95.74  | 9.00E-09 | R | M@LLEYTSSSYDEK                            | R |
|  |  |  |  |  |  |  |  |  |  | 1109 | 805.3512 | 1608.688 | 2 | 1608.687 | 0.0014  | 0 | 65.45  | 9.40E-06 | R | M@LLEYTSSSYDEK                            | R |
|  |  |  |  |  |  |  |  |  |  | 1160 | 875.4039 | 1748.793 | 2 | 1748.793 | 0.0006  | 1 | 76.34  | 1.40E-06 | R | MLLEYTSSSYDEKR                            | R |
|  |  |  |  |  |  |  |  |  |  | 1161 | 875.4034 | 1748.793 | 2 | 1748.793 | 0.0007  | 0 | 59.08  | 7.70E-05 | R | MLLEYTSSSYDEKR                            | R |
|  |  |  |  |  |  |  |  |  |  | 1163 | 589.2689 | 1764.785 | 3 | 1764.788 | -0.0028 | 1 | 52.08  | 0.00032  | R | M@LLEYTSSSYDEKR                           | R |
|  |  |  |  |  |  |  |  |  |  | 1164 | 589.2692 | 1764.786 | 3 | 1764.788 | -0.0019 | 1 | 38.47  | 0.0069   | R | M@LLEYTSSSYDEKR                           | R |
|  |  |  |  |  |  |  |  |  |  | 1165 | 883.4007 | 1764.787 | 2 | 1764.788 | -0.0008 | 1 | 78.72  | 7.00E-07 | R | M@LLEYTSSSYDEKR                           | R |
|  |  |  |  |  |  |  |  |  |  | 1185 | 901.4194 | 1800.824 | 2 | 1800.825 | -0.0007 | 0 | 55.79  | 0.00017  | R | MLMLMLC@LYNPDEFK                          | Q |
|  |  |  |  |  |  |  |  |  |  | 1191 | 909.4161 | 1816.818 | 2 | 1816.82  | -0.0001 | 0 | 80.37  | 4.70E-07 | R | M@LQIM@LYNPDEFK                           | Q |
|  |  |  |  |  |  |  |  |  |  | 1192 | 909.4173 | 1816.82  | 2 | 1816.82  | 0.0003  | 0 | 51.92  | 0.0003   | R | MLQIM@LYNPDEFK                            | Q |
|  |  |  |  |  |  |  |  |  |  | 1202 | 917.4134 | 1832.812 | 2 | 1832.815 | -0.0025 | 0 | 64.54  | 1.30E-05 | R | M@QIM@LYNPDEFK                            | Q |
|  |  |  |  |  |  |  |  |  |  | 1204 | 917.4148 | 1832.815 | 2 | 1832.815 | 0.0003  | 0 | 82.18  | 2.20E-07 | R | M@QIM@LYNPDEFK                            | Q |
|  |  |  |  |  |  |  |  |  |  | 1226 | 633.6717 | 1897.993 | 3 | 1897.994 | -0.0005 | 0 | 44.52  | 0.002    | R | GLDLPFNPLYLDGSHK                          | I |
|  |  |  |  |  |  |  |  |  |  | 1227 | 633.6718 | 1897.993 | 3 | 1897.994 | -0.0004 | 0 | 48.82  | 0.00078  | R | GLDLPFNPLYLDGSHK                          | I |
|  |  |  |  |  |  |  |  |  |  | 1228 | 633.6719 | 1897.994 | 3 | 1897.994 | 0.0002  | 0 | 34.31  | 0.02     | R | GLDLPFNPLYLDGSHK                          | I |
|  |  |  |  |  |  |  |  |  |  | 1229 | 950.0046 | 1897.995 | 2 | 1897.994 | 0.0009  | 0 | 46.54  | 0.0012   | R | GLDLPFNPLYLDGSHK                          | I |
|  |  |  |  |  |  |  |  |  |  | 1241 | 997.4981 | 1992.982 | 2 | 1992.983 | -0.0016 | 0 | 72.23  | 4.10E-06 | R | VTVYDFLAVILDIDVYR                         | M |
|  |  |  |  |  |  |  |  |  |  | 1242 | 695.335  | 1992.983 | 2 | 1992.983 | -0.0001 | 0 | 42.64  | 0.0038   | R | VTVYDFLAVILDIDVYR                         | M |
|  |  |  |  |  |  |  |  |  |  | 1253 | 725.3937 | 2173.159 | 3 | 2173.157 | 0.0002  | 1 | 36.69  | 0.0078   | R | FKGLDFPNPLYLDGSHK                         | I |
|  |  |  |  |  |  |  |  |  |  | 683  | 569.2888 | 1136.563 | 2 | 1136.565 | -0.0018 | 0 | 57.7   | 0.00028  | R | IAVAQAQ@YK                                | V |
|  |  |  |  |  |  |  |  |  |  | 961  | 663.8392 | 1325.664 | 2 | 1325.665 | -0.0012 | 0 | 52.92  | 0.00052  | R | INGGVS@TGAT@CK                            | E |
|  |  |  |  |  |  |  |  |  |  | 1048 | 493.8647 | 1457.715 | 3 | 1457.715 | -0.0002 | 0 | 41.64  | 0.0002   | R | HVFGF@E@L@GK                              | L |
|  |  |  |  |  |  |  |  |  |  | 1054 | 489.5795 | 1465.717 | 3 | 1465.716 | 0.0006  | 0 | 34.04  | 0.041    | R | TATPQQAQ@E@V@EK                           | L |
|  |  |  |  |  |  |  |  |  |  | 1055 | 733.8662 | 1465.718 | 2 | 1465.716 | 0.0018  | 0 | 65.31  | 3.20E-05 | R | TATPQQAQ@E@V@EK                           | L |
|  |  |  |  |  |  |  |  |  |  | 1080 | 513.9348 | 1538.783 | 3 | 1538.784 | -0.0015 | 0 | 42.66  | 0.0053   | R | DLGATV@V@L@H@SER                          | R |
|  |  |  |  |  |  |  |  |  |  | 1101 | 534.9673 | 1601.88  | 3 | 1601.882 | -0.0017 | 0 | 41.73  | 0.0033   | R | V@L@Y@P@W@I@G@T@K                         | T |
|  |  |  |  |  |  |  |  |  |  | 1102 | 901.9481 | 1620.817 | 2 | 1620.818 | 0.0001  | 0 | 70.17  | 4.20E-06 | R | V@L@Y@P@W@I@G@T@K                         | T |
|  |  |  |  |  |  |  |  |  |  | 1110 | 811.416  | 1620.817 | 2 | 1620.818 | -0.0008 | 0 | 78.31  | 1.40E-06 | R | V@L@Y@P@W@I@G@T@K                         | T |
|  |  |  |  |  |  |  |  |  |  | 1123 | 819.4137 | 1636.813 | 2 | 1636.813 | -0.0002 | 0 | 75.69  | 2.70E-06 | R | V@L@Y@P@W@I@G@T@K                         | T |
|  |  |  |  |  |  |  |  |  |  | 677  | 567.8331 | 1133.652 | 2 | 1133.652 | -0.0003 | 0 | 40.67  | 0.0045   | R | LIC@V@L@EK                                | D |
|  |  |  |  |  |  |  |  |  |  | 705  | 576.2822 | 1150.55  | 2 | 1150.551 | -0.0009 | 0 | 68.94  | 1.80E-05 | R | LIC@V@L@EK                                | D |
|  |  |  |  |  |  |  |  |  |  | 776  | 596.7941 | 1191.554 | 2 | 1191.555 | -0.0017 | 0 | 36     | 0.032    | R | A@G@S@L@L@D@E@C@R                         | E |
|  |  |  |  |  |  |  |  |  |  | 777  | 596.7842 | 1191.554 | 2 | 1191.555 | -0.0014 | 0 | 52.69  | 0.00069  | R | A@G@S@L@L@D@E@C@R                         | E |
|  |  |  |  |  |  |  |  |  |  | 1140 | 853.4321 | 1704.85  | 2 | 1704.851 | -0.0008 | 0 | 101.94 | 5.90E-09 | R | SC@Y@L@S@L@L@L@L@H@R                      | L |
|  |  |  |  |  |  |  |  |  |  | 1141 | 569.2906 | 1704.85  | 2 | 1704.851 | -0.0005 | 0 | 41.69  | 0.0064   | R | SC@Y@L@S@L@L@L@H@R                        | L |
|  |  |  |  |  |  |  |  |  |  | 1295 | 793.4323 | 2377.275 | 3 | 2377.275 | -0.0003 | 0 | 70.31  | 2.10E-06 | R | Y@V@I@T@G@P@V@G@P@T@S@Q@A@E@L@R           | S |
|  |  |  |  |  |  |  |  |  |  | 269  | 461.2556 | 920.4967 | 2 | 920.4967 | -0.0001 | 0 | 58.41  | 0.00018  | R | FS@V@L@D@V@K                              | H |
|  |  |  |  |  |  |  |  |  |  | 348  | 493.7502 | 985.4858 | 2 | 985.4869 | -0.0011 | 0 | 38.77  | 0.014    | R | H@F@S@P@E@L@K                             | V |
|  |  |  |  |  |  |  |  |  |  | 350  | 493.7503 | 985.4861 | 2 | 985.4869 | -0.0008 | 0 | 47.57  | 0.0019   | R | H@F@S@P@E@L@K                             | V |
|  |  |  |  |  |  |  |  |  |  | 498  | 544.759  | 1087.503 | 2 | 1087.503 | -0.0013 | 0 | 40.81  | 0.0066   | R | Q@E@H@P@S@R                               | K |
|  |  |  |  |  |  |  |  |  |  | 538  | 555.811  | 1109.608 | 2 | 1109.608 | -0.0005 | 0 | 49.17  | 0.0011   | R | E@E@K@P@A@V@A@A@P@K                       | K |
|  |  |  |  |  |  |  |  |  |  | 603  | 583.3317 | 1164.649 | 2 | 1164.65  | -0.0015 | 0 | 42.84  | 0.0038   | R | V@L@D@V@I@E@V@H@G@K                       | H |
|  |  |  |  |  |  |  |  |  |  | 604  | 389.2243 | 1164.651 | 2 | 1164.65  | 0.0009  | 0 | 40.88  | 0.0049   | R | V@L@D@V@I@E@V@H@G@K                       | H |
|  |  |  |  |  |  |  |  |  |  | 75   | 477.5631 | 1429.728 | 3 | 1429.729 | -0.0013 | 0 | 40.25  | 0.0097   | R | #M@D@I@A@H@P@W@I@R                        | R |
|  |  |  |  |  |  |  |  |  |  | 783  | 452.9149 | 1445.723 | 3 | 1445.724 | -0.0008 | 0 | 38.52  | 0.015    | R | #M@D@I@A@H@P@W@I@R                        | R |
|  |  |  |  |  |  |  |  |  |  | 784  | 723.8689 | 1445.723 | 3 | 1445.724 | -0.0005 | 0 | 47.53  | 0.0019   | R | #M@D@I@A@H@P@W@I@R                        | R |
|  |  |  |  |  |  |  |  |  |  | 798  | 739.8505 | 1477.686 | 2 | 1477.687 | -0.0007 | 0 | 72.73  | 4.90E-06 | R | A@P@S@W@I@D@T@G@L@S@E@M@R@                | L |
|  |  |  |  |  |  |  |  |  |  | 1101 | 575.464  | 2623.37  | 3 | 2623.371 | -0.0004 | 0 | 85.71  | 8.10E-08 | R | I@P@A@D@V@P@T@I@S@L@S@D@S@D@V@L@T@N@G@P@R | L |
|  |  |  |  |  |  |  |  |  |  | 900  | 493.5693 | 1477.686 | 2 | 1477.687 | -0.0011 | 0 | 33.13  | 0.045    | R | A@P@S@W@I@D@T@G@L@S@E@M@R@                | L |
|  |  |  |  |  |  |  |  |  |  | 901  | 739.8509 | 1477.687 | 2 | 1477.687 | -0.0008 | 0 | 68.86  | 3.00E-07 | R | A@P@S@W@I@D@T@G@L@S@E@M@R@                | L |
|  |  |  |  |  |  |  |  |  |  | 940  | 540.8112 | 1079.608 | 2 | 1079.609 | -0.001  | 0 | 66.04  | 1.60E-05 | R | T@L@A@D@V@H@R                             | G |
|  |  |  |  |  |  |  |  |  |  | 933  | 519.9331 | 1556.778 | 3 | 1556.78  | -0.0028 | 0 | 54.41  | 0.00035  | R | I@O@H@L@C@T@G@N@L@C@T@K                   | G |
|  |  |  |  |  |  |  |  |  |  | 934  | 779.397  | 1556.778 | 3 | 1556.78  | -0.0006 | 0 | 35.3   | 0.014    | R | I@O@H@L@C@T@G@N@L@C@T@K                   | G |
|  |  |  |  |  |  |  |  |  |  | 936  | 784.8467 | 1567.679 | 3 | 1567.679 | -0.0001 | 0 | 59.01  | 5.60E-05 | R | G@D@F@E@N@L@N@Y@P@E@Q@K                   | V |
|  |  |  |  |  |  |  |  |  |  | 937  | 784.847  | 1567.679 | 3 | 1567.679 | 0.0004  | 0 | 37.7   | 0.0072   | R | G@D@F@E@N@L@N@Y@P@E@Q@K                   | V |
|  |  |  |  |  |  |  |  |  |  | 950  | 543.6481 | 1627.923 | 3 | 1627.923 | -0.0007 | 0 | 43.71  | 0.0011   | R | M@L@V@L@V@L@D@H@P@I@R                     | C |
|  |  |  |  |  |  |  |  |  |  | 951  | 543.6483 | 1627.923 | 3 | 1627.923 | -0.0003 | 0 | 34.49  | 0.008    | R | M@L@V@L@V@L@D@H@P@I@R                     | C |
|  |  |  |  |  |  |  |  |  |  | 916  | 515.731  | 1349.743 | 3 | 1349.743 | 0.0001  | 0 | 80.31  | 5.00E-07 | R | L@G@I@H@V@L@N@A@E@A@R                     | S |
|  |  |  |  |  |  |  |  |  |  | 817  | 450.9215 | 1349.743 | 3 | 1349.742 | 0.0013  | 0 | 56.64  | 0.00012  | R | L@G@I@H@V@L@N@A@E@A@R                     | S |
|  |  |  |  |  |  |  |  |  |  | 859  | 713.8755 | 1425.737 | 2 | 1425.736 | 0.0006  | 0 | 61.65  | 6.40E-05 | R | S@P@T@V@I@A@Y@L@M@M@R@                    | Q |
|  |  |  |  |  |  |  |  |  |  |      |          |          |   |          |         |   |        |          |   |                                           |   |

|        |                                       |     |   |   |       |      |                                                                               |                                                                                 |                                                                                 |                                                                                    |                                                                             |                                                                                     |                                                                                 |                                                                        |                                                                          |                                                                              |                                                                             |                                                                              |                                                                                 |                                                                                   |                                                                         |                                                                            |                                                                           |                                                                           |                                                                            |                                                                             |                                                                                       |                                                                                      |                                                                                      |                                                                                    |                                                                                          |                                                                                         |                                                                                             |                                                                                         |                                                                                          |                                                                                       |                                                                                       |                                                                                                       |                                                                                                       |                                                                                                                       |                                                                                                                       |                                                                                                                           |                                                                                                                             |                                                                                                                            |                                                                                                                            |                                                                                                                             |                                                                                                                        |                                                                                                                            |                                                                                                                            |                                                                             |                                                                    |                                                                            |                                                                              |                                                                             |                                                                             |                                                                            |                                                                           |                                                                           |                                                                            |                                                                           |                                                                                  |                                                                                 |                                                                               |                                                                                 |                                                                               |                                                                               |                                                                               |                                                                                |                                                                                 |                                                                                           |                                                                                           |                                                                                           |                                                                                             |                                                                                            |                                                                                        |                                                                                           |                                                                                        |                                                                                           |                                                                                           |                                                                                         |                                                                                             |                                                                                        |                                                                                          |                                                                                          |                                                                                             |                                                                                             |                                                                                            |                                                                                         |                                                                                            |                                                                                          |                                                                             |                                                                                           |                                                                                            |                                                                                         |                                                                                        |                                                                                            |                                                                                           |                                                                                              |                                                                                             |                                                                                             |                                                                                             |                                                                                             |                                                                                            |                                                                                              |                                                                                             |                                                                                           |                                                                                              |                                                       |
|--------|---------------------------------------|-----|---|---|-------|------|-------------------------------------------------------------------------------|---------------------------------------------------------------------------------|---------------------------------------------------------------------------------|------------------------------------------------------------------------------------|-----------------------------------------------------------------------------|-------------------------------------------------------------------------------------|---------------------------------------------------------------------------------|------------------------------------------------------------------------|--------------------------------------------------------------------------|------------------------------------------------------------------------------|-----------------------------------------------------------------------------|------------------------------------------------------------------------------|---------------------------------------------------------------------------------|-----------------------------------------------------------------------------------|-------------------------------------------------------------------------|----------------------------------------------------------------------------|---------------------------------------------------------------------------|---------------------------------------------------------------------------|----------------------------------------------------------------------------|-----------------------------------------------------------------------------|---------------------------------------------------------------------------------------|--------------------------------------------------------------------------------------|--------------------------------------------------------------------------------------|------------------------------------------------------------------------------------|------------------------------------------------------------------------------------------|-----------------------------------------------------------------------------------------|---------------------------------------------------------------------------------------------|-----------------------------------------------------------------------------------------|------------------------------------------------------------------------------------------|---------------------------------------------------------------------------------------|---------------------------------------------------------------------------------------|-------------------------------------------------------------------------------------------------------|-------------------------------------------------------------------------------------------------------|-----------------------------------------------------------------------------------------------------------------------|-----------------------------------------------------------------------------------------------------------------------|---------------------------------------------------------------------------------------------------------------------------|-----------------------------------------------------------------------------------------------------------------------------|----------------------------------------------------------------------------------------------------------------------------|----------------------------------------------------------------------------------------------------------------------------|-----------------------------------------------------------------------------------------------------------------------------|------------------------------------------------------------------------------------------------------------------------|----------------------------------------------------------------------------------------------------------------------------|----------------------------------------------------------------------------------------------------------------------------|-----------------------------------------------------------------------------|--------------------------------------------------------------------|----------------------------------------------------------------------------|------------------------------------------------------------------------------|-----------------------------------------------------------------------------|-----------------------------------------------------------------------------|----------------------------------------------------------------------------|---------------------------------------------------------------------------|---------------------------------------------------------------------------|----------------------------------------------------------------------------|---------------------------------------------------------------------------|----------------------------------------------------------------------------------|---------------------------------------------------------------------------------|-------------------------------------------------------------------------------|---------------------------------------------------------------------------------|-------------------------------------------------------------------------------|-------------------------------------------------------------------------------|-------------------------------------------------------------------------------|--------------------------------------------------------------------------------|---------------------------------------------------------------------------------|-------------------------------------------------------------------------------------------|-------------------------------------------------------------------------------------------|-------------------------------------------------------------------------------------------|---------------------------------------------------------------------------------------------|--------------------------------------------------------------------------------------------|----------------------------------------------------------------------------------------|-------------------------------------------------------------------------------------------|----------------------------------------------------------------------------------------|-------------------------------------------------------------------------------------------|-------------------------------------------------------------------------------------------|-----------------------------------------------------------------------------------------|---------------------------------------------------------------------------------------------|----------------------------------------------------------------------------------------|------------------------------------------------------------------------------------------|------------------------------------------------------------------------------------------|---------------------------------------------------------------------------------------------|---------------------------------------------------------------------------------------------|--------------------------------------------------------------------------------------------|-----------------------------------------------------------------------------------------|--------------------------------------------------------------------------------------------|------------------------------------------------------------------------------------------|-----------------------------------------------------------------------------|-------------------------------------------------------------------------------------------|--------------------------------------------------------------------------------------------|-----------------------------------------------------------------------------------------|----------------------------------------------------------------------------------------|--------------------------------------------------------------------------------------------|-------------------------------------------------------------------------------------------|----------------------------------------------------------------------------------------------|---------------------------------------------------------------------------------------------|---------------------------------------------------------------------------------------------|---------------------------------------------------------------------------------------------|---------------------------------------------------------------------------------------------|--------------------------------------------------------------------------------------------|----------------------------------------------------------------------------------------------|---------------------------------------------------------------------------------------------|-------------------------------------------------------------------------------------------|----------------------------------------------------------------------------------------------|-------------------------------------------------------|
| P85094 | Isochorismatase domain-containing pro | 254 | 7 | 5 | 22403 | 8.25 | 974 626.3246 1875.952 3 1875.951 0.0009 0 40.72 0.0058 K FSPLTANLM@NLLAENGR L | 975 938.9843 1875.954 2 1875.951 0.0027 0 83.49 3.20E-07 K FSPLTANLM@NLLAENGR L | 1032 1078.0275 2031.061 3 2031.057 0.0036 0 0.00 0.00072 R LGTNGQISAFSTIMSVHR L | 1048 1624.533 2047.051 2 2047.052 -0.0009 0 64.87 1.90E-05 R LGTNGQISAFSTIM@SVHR G | 1049 683.358 2047.052 3 2047.052 0 0 74.87 1.90E-06 R LGTNGQISAFSTIM@SVHR G | 1172 1151.578 2301.141 2 2301.141 -0.0005 0 70.35 5.10E-06 R GEVPC@TVTASPDLDAVLEK T | 1173 768.0548 2301.143 3 2301.141 0.0016 0 33.79 0.022 R GEVPC@TVTASPDLDAVLEK T | 731 649.3177 1296.621 2 1296.621 0.0002 0 36.55 0.023 K TC@FSM@VPALK T | 985 585.733 1303.997 2 1303.997 0.0017 0 30.76 0.044 R ILPESSFLC@DLOEK F | 986 953.0068 1903.999 2 1903.997 0.0026 0 80.01 5.40E-07 R ILPESSFLC@DLOEK F | 994 641.3599 1921.058 3 1921.057 0.0006 0 38.84 0.0029 K FRPSIAPFQIVSVAAR M | 998 645.0295 1932.067 3 1932.068 -0.0014 0 32.86 0.015 R QSGAFLATESLILQLVR D | 999 967.0416 1932.069 2 1932.068 0.0007 0 102.14 1.50E-09 R QSGAFLATESLILQLVR D | 1003 1022.873 2047.052 3 2047.052 0 0 78.13 3.10E-07 R SOLG@L@G@T@G@C@L@NT@LDLH R | 365 514.808 1027.602 2 1027.603 -0.001 1 37.85 0.016 K GELLEAKR F       | 809 720.9068 1439.799 2 1439.798 0.0006 0 85.14 1.40E-07 K GDVTV@VALQPAK F | 810 720.9068 1439.799 2 1439.798 0.0006 0 54.87 0.00015 K GDVTV@VALQPAK F | 811 460.9403 1439.799 3 1439.798 0.0008 0 32.78 0.024 K GDVTV@VALQPAK F   | 922 581.9853 1742.874 3 1742.874 0.0002 0 48.63 0.0013 K AIWNVINWENVTER F  | 923 872.4447 1742.875 2 1742.874 0.0009 0 69.69 9.90E-06 K AIWNVINWENVTER Y | 1072 714.0294 2139.066 3 2139.065 0.0012 0 38.03 0.011 K FNSGGHINH@F@W@L@SPK G        |                                                                                      |                                                                                      |                                                                                    |                                                                                          |                                                                                         |                                                                                             |                                                                                         |                                                                                          |                                                                                       |                                                                                       |                                                                                                       |                                                                                                       |                                                                                                                       |                                                                                                                       |                                                                                                                           |                                                                                                                             |                                                                                                                            |                                                                                                                            |                                                                                                                             |                                                                                                                        |                                                                                                                            |                                                                                                                            |                                                                             |                                                                    |                                                                            |                                                                              |                                                                             |                                                                             |                                                                            |                                                                           |                                                                           |                                                                            |                                                                           |                                                                                  |                                                                                 |                                                                               |                                                                                 |                                                                               |                                                                               |                                                                               |                                                                                |                                                                                 |                                                                                           |                                                                                           |                                                                                           |                                                                                             |                                                                                            |                                                                                        |                                                                                           |                                                                                        |                                                                                           |                                                                                           |                                                                                         |                                                                                             |                                                                                        |                                                                                          |                                                                                          |                                                                                             |                                                                                             |                                                                                            |                                                                                         |                                                                                            |                                                                                          |                                                                             |                                                                                           |                                                                                            |                                                                                         |                                                                                        |                                                                                            |                                                                                           |                                                                                              |                                                                                             |                                                                                             |                                                                                             |                                                                                             |                                                                                            |                                                                                              |                                                                                             |                                                                                           |                                                                                              |                                                       |
|        |                                       |     |   |   |       |      | 87                                                                            | O5EBG6                                                                          | Heat shock protein beta-6                                                       | 1395                                                                               | 35                                                                          | 10                                                                                  | 17510                                                                           | 5.64                                                                   | 615 599.8268 1197.639 2 1197.639 -0.0002 0 32.75 0.049 K HFLPEEISVK V    | 618 599.8271 1197.64 2 1197.639 0.0003 0 38.12 0.013 K HFLPEEISVK V          | 653 614.3274 1226.64 2 1226.641 -0.0005 0 47.03 0.0019 R ASAPLPGFSAPGR L    | 655 614.3277 1226.641 2 1226.641 0.0001 0 33.71 0.044 R ASAPLPGFSAPGR L      | 656 614.3278 1226.641 2 1226.641 0.0003 0 50.89 0.00083 R ASAPLPGFSAPGR L       | 657 614.3278 1226.641 2 1226.641 0.0003 0 65.05 3.20E-05 R ASAPLPGFSAPGR L        | 717 638.3246 1274.635 2 1274.637 -0.0022 0 60.46 0.00012 K VDDHVEVHAR H | 719 425.8858 1274.636 3 1274.637 -0.0012 0 40.85 0.01 K VDDHVEVHAR H       | 720 425.8858 1274.636 3 1274.637 -0.0011 0 61.87 8.30E-05 K VDDHVEVHAR H  | 733 652.3794 1382.742 3 1382.742 0.0003 0 41.58 0.0052 R RASAPLPGFSAPGR L | 786 461.5215 1382.743 3 1382.742 0.0008 1 51.43 0.00054 R RASAPLPGFSAPGR L | 843 797.4282 1592.842 2 1592.839 0.0033 0 42.52 0.0036 - #MEIPV@V@PSWLR R   | 1201 855.7864 2564.338 3 2564.337 0.0001 0 53.71 0.00012 R APSVALTAQ@STDS@Y@SVLDDVK H | 1202 855.7869 2564.339 3 2564.337 0.0016 0 37.09 0.0049 R APSVALTAQ@STDS@Y@SVLDDVK H | 1203 855.7872 2564.34 3 2564.337 0.0025 0 59.7 7.10E-05 R APSVALTAQ@STDS@Y@SVLDDVK H | 1204 1283.178 2564.34 2 2564.337 0.003 0 53.3 0.00013 R APSVALTAQ@STDS@Y@SVLDDVK H | 1205 1283.178 2564.341 2 2564.337 0.0038 0 106.84 5.0E-10 R APSVALTAQ@STDS@Y@SVLDDVK H   | 1208 855.7884 2564.343 3 2564.337 0.0059 0 83.63 1.10E-07 R APSVALTAQ@STDS@Y@SVLDDVK H  | 1216 875.4517 2623.333 3 2623.332 -0.0002 0 29.87 0.009 R F@G@L@E@L@S@L@P@A@I@P@Y@L R       | 1217 1312.675 2623.335 2 2623.336 -0.0005 0 69.3 4.50E-06 R F@G@L@E@L@S@L@P@A@I@P@Y@L R | 1218 1312.675 2623.335 2 2623.336 -0.0005 0 57.59 6.60E-05 R F@G@L@E@L@S@L@P@A@I@P@Y@L R | 1220 656.8416 2623.337 4 2623.336 0.0018 0 48.4 0.00016 R F@G@L@E@L@S@L@P@A@I@P@Y@L R | 1221 875.4537 2623.339 3 2623.336 0.0036 0 53.3 0.00016 R F@G@L@E@L@S@L@P@A@I@P@Y@L R | 1321 1248.996 3743.967 3 3743.966 0.0001 1 66.91 7.0E-06 R APSVALTAQ@STDS@Y@SVLDDVK@H@F@P@E@I@S@V@K V | 1322 937.0012 3743.976 4 3743.966 0.0093 1 76.2 2.10E-07 R APSVALTAQ@STDS@Y@SVLDDVK@H@F@P@E@I@S@V@K V | 1329 952.0156 3804.033 4 3804.031 0.0025 0 71.63 5.10E-07 R LPPGV@P@A@V@T@S@L@S@P@E@V@L@S@I@Q@T@P@S@A@Q@L@P@S@P@A@K - | 1331 952.0161 3804.035 4 3804.031 0.0044 0 77.56 1.30E-07 R LPPGV@P@A@V@T@S@L@S@P@E@V@L@S@I@Q@T@P@S@A@Q@L@P@S@P@A@K - | 1332 952.2536 3805.025 4 3804.031 0.9944 0 31.29 0.0042 31 YR@L@P@G@V@P@A@V@T@S@L@S@P@E@V@L@S@I@Q@T@P@S@A@Q@L@P@S@P@A@K - | 1340 1031.806 4123.195 4 4123.195 -0.0008 1 51.79 4.50E-05 R YR@L@P@G@V@P@A@V@T@S@L@S@P@E@V@L@S@I@Q@T@P@S@A@Q@L@P@S@P@A@K - | 1341 1375.406 4123.196 3 4123.195 0.0001 1 59.62 7.00E-06 R YR@L@P@G@V@P@A@V@T@S@L@S@P@E@V@L@S@I@Q@T@P@S@A@Q@L@P@S@P@A@K - | 1342 1375.406 4123.196 3 4123.195 0.0005 0 93.54 2.80E-09 R YR@L@P@G@V@P@A@V@T@S@L@S@P@E@V@L@S@I@Q@T@P@S@A@Q@L@P@S@P@A@K - | 1343 1031.807 4123.198 4 4123.195 0.0031 1 118.29 9.30E-12 R YR@L@P@G@V@P@A@V@T@S@L@S@P@E@V@L@S@I@Q@T@P@S@A@Q@L@P@S@P@A@K - | 1344 1375.407 4123.199 3 4123.195 0.0034 1 67.43 0.0006 YR@L@P@G@V@P@A@V@T@S@L@S@P@E@V@L@S@I@Q@T@P@S@A@Q@L@P@S@P@A@K - | 1345 1031.807 4123.199 4 4123.195 0.0036 1 86.29 1.60E-08 R YR@L@P@G@V@P@A@V@T@S@L@S@P@E@V@L@S@I@Q@T@P@S@A@Q@L@P@S@P@A@K - | 1346 1031.808 4123.202 4 4123.195 0.0065 1 92.64 3.30E-09 R YR@L@P@G@V@P@A@V@T@S@L@S@P@E@V@L@S@I@Q@T@P@S@A@Q@L@P@S@P@A@K - | 885 826.4274 1650.84 2 1650.84 0.0004 0 80 9.50E-05 R IQAGC@S@A@I@L@S@E@R F |                                                                    |                                                                            |                                                                              |                                                                             |                                                                             |                                                                            |                                                                           |                                                                           |                                                                            |                                                                           |                                                                                  |                                                                                 |                                                                               |                                                                                 |                                                                               |                                                                               |                                                                               |                                                                                |                                                                                 |                                                                                           |                                                                                           |                                                                                           |                                                                                             |                                                                                            |                                                                                        |                                                                                           |                                                                                        |                                                                                           |                                                                                           |                                                                                         |                                                                                             |                                                                                        |                                                                                          |                                                                                          |                                                                                             |                                                                                             |                                                                                            |                                                                                         |                                                                                            |                                                                                          |                                                                             |                                                                                           |                                                                                            |                                                                                         |                                                                                        |                                                                                            |                                                                                           |                                                                                              |                                                                                             |                                                                                             |                                                                                             |                                                                                             |                                                                                            |                                                                                              |                                                                                             |                                                                                           |                                                                                              |                                                       |
|        |                                       |     |   |   |       |      |                                                                               |                                                                                 |                                                                                 |                                                                                    |                                                                             |                                                                                     |                                                                                 |                                                                        | 88                                                                       | O01768                                                                       | Nucleoside diphosphate kinase B                                             | 292                                                                          | 10                                                                              | 7                                                                                 | 17352                                                                   | 6.97                                                                       | 292 492.8134 983.6122 2 983.6127 -0.0006 1 59.23 4.90E-05 R GLVGEIKR F    | 388 526.2531 1050.492 2 1050.492 -0.0001 0 41.13 0.011 R GDFC@IQVGR N     | 389 526.2532 1050.492 2 1050.492 0.0001 0 60.19 0.00013 R GDFC@IQVGR N     | 549 588.3323 1174.65 2 1174.65 0.0002 0 33.95 0.038 K DRPFF@GLVK Y          | 654 672.8854 1343.756 2 1343.756 0.0002 0 51.35 0.00049 R T@I@K@P@D@G@V@R G           | 665 448.9264 1343.757 3 1343.756 0.0011 0 33.84 0.027 R T@I@K@P@D@G@V@R G            | 697 495.9102 1484.709 3 1484.711 -0.0019 0 43.81 0.0037 R NIIHGSS@V@S@E@A@K E        | 698 743.3622 1484.71 2 1484.711 -0.0009 0 75.05 3.00E-06 R NIIHGSS@V@S@E@A@K E     | 694 501.3082 1800.903 3 1800.904 0.0003 0 50.13 0.00079 R VM@L@G@T@N@P@A@D@S@K@P@G@T@R G | 706 901.4599 1800.905 2 1800.904 0.0013 0 46.63 0.0017 R VM@L@G@T@N@P@A@D@S@K@P@G@T@R G | 815 1063.026 2124.037 2 2124.038 -0.0019 0 55.01 0.00023 K YM@N@S@G@P@V@A@M@V@E@G@L@N@V@K T |                                                                                         |                                                                                          |                                                                                       |                                                                                       |                                                                                                       |                                                                                                       |                                                                                                                       |                                                                                                                       |                                                                                                                           |                                                                                                                             |                                                                                                                            |                                                                                                                            |                                                                                                                             |                                                                                                                        |                                                                                                                            |                                                                                                                            |                                                                             |                                                                    |                                                                            |                                                                              |                                                                             |                                                                             |                                                                            |                                                                           |                                                                           |                                                                            |                                                                           |                                                                                  |                                                                                 |                                                                               |                                                                                 |                                                                               |                                                                               |                                                                               |                                                                                |                                                                                 |                                                                                           |                                                                                           |                                                                                           |                                                                                             |                                                                                            |                                                                                        |                                                                                           |                                                                                        |                                                                                           |                                                                                           |                                                                                         |                                                                                             |                                                                                        |                                                                                          |                                                                                          |                                                                                             |                                                                                             |                                                                                            |                                                                                         |                                                                                            |                                                                                          |                                                                             |                                                                                           |                                                                                            |                                                                                         |                                                                                        |                                                                                            |                                                                                           |                                                                                              |                                                                                             |                                                                                             |                                                                                             |                                                                                             |                                                                                            |                                                                                              |                                                                                             |                                                                                           |                                                                                              |                                                       |
|        |                                       |     |   |   |       |      |                                                                               |                                                                                 |                                                                                 |                                                                                    |                                                                             |                                                                                     |                                                                                 |                                                                        |                                                                          |                                                                              |                                                                             |                                                                              |                                                                                 |                                                                                   |                                                                         |                                                                            | 89                                                                        | O01768                                                                    | Nucleoside diphosphate kinase B                                            | 2223                                                                        | 83                                                                                    | 15                                                                                   | 17352                                                                                | 6.97                                                                               | 81 414.7631 827.5116 2 827.5116 0 0 31.38 0.05 R GLVGEIK R                               | 83 414.7634 827.512 2 827.5116 0.0006 0 58.98 0.00074 R GLVGEIK R                       | 84 414.7635 827.5124 2 827.5116 0.0008 0 56.75 0.00014 R GLVGEIK R                          | 214 458.7479 915.4813 2 915.4814 -0.0001 0 35.77 0.049 K QHYIDLK D                      | 215 458.748 915.4814 2 915.4814 0 0 35.81 0.049 K QHYIDLK D                              | 326 492.8132 983.6119 2 983.6127 -0.0009 0 48.27 0.00061 R GLVGEIKR F                 | 327 492.8132 983.6119 2 983.6127 -0.0008 1 59.35 4.80E-05 R GLVGEIKR F                | 328 492.8134 983.6123 2 983.6127 -0.0005 1 59.07 5.10E-05 R GLVGEIKR F                                | 452 526.2526 1050.491 2 1050.492 -0.0001 0 49.57 0.0014 R GDFC@IQVGR N                                | 453 526.2527 1050.491 2 1050.492 -0.0007 0 62.94 6.60E-05 R GDFC@IQVGR N                                              | 454 526.2528 1050.491 2 1050.492 0.0006 0 65.92 3.40E-05 R GDFC@IQVGR N                                               | 455 526.2529 1050.491 2 1050.492 -0.0005 0 47.91 0.002 R GDFC@IQVGR N                                                     | 456 526.2529 1050.491 2 1050.492 -0.0004 0 44.91 0.004 R GDFC@IQVGR N                                                       | 457 526.2529 1050.491 2 1050.492 -0.0004 0 40.56 0.011 R GDFC@IQVGR N                                                      | 458 526.253 1050.491 2 1050.492 -0.0003 0 38.06 0.019 R GDFC@IQVGR N                                                       | 459 526.2531 1050.492 2 1050.492 -0.0001 0 48.62 0.0019 R GDFC@IQVGR N                                                      | 460 526.2531 1050.492 2 1050.492 -0.0001 0 66.38 3.20E-05 R GDFC@IQVGR N                                               | 651 583.7323 1165.45 2 1165.45 0.0002 0 28.1 0.015 K SC@A@H@D@V@Y@E -                                                      | 662 588.332 1174.65 2 1174.65 -0.0004 0 36.51 0.021 K DRPFF@GLVK Y                                                         | 664 588.3323 1174.65 2 1174.65 0.0002 0 32.76 0.05 K DRPFF@GLVK Y           | 665 588.3324 1174.65 2 1174.65 0.0004 0 33.01 0.048 K DRPFF@GLVK Y | 911 672.8848 1343.755 2 1343.756 -0.001 0 46.86 0.0013 R T@I@K@P@D@G@V@R G | 913 672.8851 1343.756 2 1343.756 -0.0006 0 48.77 0.00084 R T@I@K@P@D@G@V@R G | 917 672.8853 1343.756 2 1343.756 -0.0001 0 47.62 0.0012 R T@I@K@P@D@G@V@R G | 918 672.8853 1343.756 2 1343.756 -0.0001 0 53.42 0.0009 R T@I@K@P@D@G@V@R G | 919 672.8854 1343.756 2 1343.756 0.0002 0 46.65 0.0014 R T@I@K@P@D@G@V@R G | 921 448.9261 1343.756 3 1343.756 0.0002 0 37.41 0.012 R T@I@K@P@D@G@V@R G | 924 448.9261 1343.757 3 1343.756 0.0005 0 32.81 0.034 R T@I@K@P@D@G@V@R G | 925 448.9262 1343.757 3 1343.756 0.0006 0 39.82 0.0067 R T@I@K@P@D@G@V@R G | 929 448.9264 1343.757 3 1343.756 0.0013 0 34.57 0.024 R T@I@K@P@D@G@V@R G | 1040 743.3618 1484.709 2 1484.711 -0.0016 0 65.82 2.30E-05 R NIIHGSS@V@S@E@A@K E | 1042 495.9104 1484.709 3 1484.711 -0.0014 0 53.28 0.00042 R NIIHGSS@V@S@E@A@K E | 1043 495.9104 1484.709 3 1484.711 -0.0013 0 47.3 0.0017 R NIIHGSS@V@S@E@A@K E | 1045 743.3621 1484.71 2 1484.711 -0.0011 0 49.84 9.40E-05 R NIIHGSS@V@S@E@A@K E | 1046 743.3621 1484.71 2 1484.711 -0.001 0 59.26 0.00011 R NIIHGSS@V@S@E@A@K E | 1047 495.9105 1484.71 3 1484.711 -0.0009 0 41.25 0.0025 R NIIHGSS@V@S@E@A@K E | 1049 495.9106 1484.71 3 1484.711 -0.0008 0 48.98 0.0012 R NIIHGSS@V@S@E@A@K E | 1050 743.3622 1484.71 2 1484.711 -0.0007 0 51.61 0.00086 R NIIHGSS@V@S@E@A@K E | 1051 743.3623 1484.71 2 1484.711 -0.0006 0 69.97 9.60E-06 R NIIHGSS@V@S@E@A@K E | 1229 595.9761 1784.906 3 1784.909 -0.0027 0 46.44 0.0016 R VM@L@G@T@N@P@A@D@S@K@P@G@T@R G | 1230 595.9761 1784.907 3 1784.909 -0.0025 0 41.47 0.0052 R VM@L@G@T@N@P@A@D@S@K@P@G@T@R G | 1232 595.9767 1784.908 3 1784.909 -0.0007 0 44.88 0.0025 R VM@L@G@T@N@P@A@D@S@K@P@G@T@R G | 1233 893.4616 1784.909 3 1784.909 -0.0004 0 97.22 1.50E-08 R VM@L@G@T@N@P@A@D@S@K@P@G@T@R G | 1234 595.9769 1784.909 3 1784.909 -0.0003 0 49.52 0.00086 R VM@L@G@T@N@P@A@D@S@K@P@G@T@R G | 1235 893.462 1784.909 3 1784.909 0.0003 0 37.72 0.012 R VM@L@G@T@N@P@A@D@S@K@P@G@T@R G | 1236 595.9771 1784.91 3 1784.909 0.0004 0 58.88 8.90E-05 R VM@L@G@T@N@P@A@D@S@K@P@G@T@R G | 1237 893.4623 1784.91 3 1784.909 0.0011 0 34.27 0.025 R VM@L@G@T@N@P@A@D@S@K@P@G@T@R G | 1248 601.3079 1800.902 3 1800.904 -0.0022 0 50.4 0.00069 R VM@L@G@T@N@P@A@D@S@K@P@G@T@R G | 1249 601.3079 1800.902 3 1800.904 -0.0021 0 44.41 0.0028 R VM@L@G@T@N@P@A@D@S@K@P@G@T@R G | 1250 601.308 1800.902 3 1800.904 -0.0019 0 33.74 0.035 R VM@L@G@T@N@P@A@D@S@K@P@G@T@R G | 1252 901.4584 1800.902 3 1800.904 -0.0018 0 81.56 5.80E-07 R VM@L@G@T@N@P@A@D@S@K@P@G@T@R G | 1253 601.308 1800.902 3 1800.904 0.0017 0 38.64 0.011 R VM@L@G@T@N@P@A@D@S@K@P@G@T@R G | 1254 601.3082 1800.903 3 1800.904 -0.0013 0 42.12 0.005 R VM@L@G@T@N@P@A@D@S@K@P@G@T@R G | 1255 601.3082 1800.903 3 1800.904 -0.0013 0 52.1 0.0005 R VM@L@G@T@N@P@A@D@S@K@P@G@T@R G | 1258 901.4589 1800.903 3 1800.904 -0.0008 0 63.34 3.80E-05 R VM@L@G@T@N@P@A@D@S@K@P@G@T@R G | 1259 901.4589 1800.903 3 1800.904 -0.0008 0 83.58 3.60E-07 R VM@L@G@T@N@P@A@D@S@K@P@G@T@R G | 1260 601.3084 1800.903 3 1800.904 -0.0006 0 44.84 0.00032 R VM@L@G@T@N@P@A@D@S@K@P@G@T@R G | 1261 601.3084 1800.903 3 1800.904 -0.0006 0 32.19 0.05 R VM@L@G@T@N@P@A@D@S@K@P@G@T@R G | 1262 901.4593 1800.904 2 1800.904 0.0002 0 72.81 4.20E-06 R VM@L@G@T@N@P@A@D@S@K@P@G@T@R G | 1263 901.46 1800.905 2 1800.904 0.0014 0 61.52 5.40E-05 R VM@L@G@T@N@P@A@D@S@K@P@G@T@R G | 1383 860.5151 1959.016 2 1959.014 0.0014 0 46.18 0.0015 R E@H@L@F@E@L@Y@K S | 1497 698.3568 2092.049 3 2092.049 0.0001 0 57.06 0.00014 K YM@S@G@P@V@A@M@V@E@G@L@N@V@K T | 1498 698.3569 2092.049 3 2092.049 0.0004 0 63.19 3.40E-05 K YM@S@G@P@V@A@M@V@E@G@L@N@V@K T | 1499 698.3569 2092.049 3 2092.049 0.0004 0 33.04 0.035 K YM@S@G@P@V@A@M@V@E@G@L@N@V@K T | 1500 1047.032 2092.049 2 2092.049 0.0006 0 43.8 0.003 K YM@S@G@P@V@A@M@V@E@G@L@N@V@K T | 1501 1047.032 2092.049 2 2092.049 0.0009 0 73.34 3.30E-06 K YM@S@G@P@V@A@M@V@E@G@L@N@V@K T | 1502 1047.032 2092.05 2 2092.049 0.0011 0 69.46 8.10E-06 K YM@S@G@P@V@A@M@V@E@G@L@N@V@K T | 1512 1055.029 2108.044 2 2108.044 0.0008 0 60.88 5.10E-05 K YM@N@S@G@P@V@A@M@V@E@G@L@N@V@K T | 1513 1055.03 2108.045 2 2108.044 0.0011 0 77.78 1.00E-06 K YM@N@S@G@P@V@A@M@V@E@G@L@N@V@K T | 1514 1055.03 2108.045 2 2108.044 0.0015 0 74.56 2.30E-06 K YM@N@S@G@P@V@A@M@V@E@G@L@N@V@K T | 1515 1055.03 2108.045 2 2108.044 0.0018 0 98.52 9.10E-09 K YM@N@S@G@P@V@A@M@V@E@G@L@N@V@K T | 1516 1055.03 2108.046 2 2108.044 0.0023 0 88.87 8.50E-08 K YM@N@S@G@P@V@A@M@V@E@G@L@N@V@K T | 1517 703.6893 2108.046 3 2108.044 0.0025 0 47.88 0.0011 K YM@N@S@G@P@V@A@M@V@E@G@L@N@V@K T | 1518 703.6894 2108.046 3 2108.044 0.0027 0 63.85 2.60E-05 K YM@N@S@G@P@V@A@M@V@E@G@L@N@V@K T | 1519 703.6895 2108.047 3 2108.044 0.0032 0 34.66 0.00032 K YM@N@S@G@P@V@A@M@V@E@G@L@N@V@K T | 1520 703.6897 2108.047 3 2108.044 0.0038 0 47.74 0.001 K YM@N@S@G@P@V@A@M@V@E@G@L@N@V@K T | 1530 1063.027 2124.039 2 2124.038 0.0003 0 73.96 2.70E-06 K YM@N@S@G@P@V@A@M@V@E@G@L@N@V@K T | 1532 709.0204 2124.039 3 2124.038 0.0009 0 31.48 0.04 |





|        |                                       |      |    |    |       |      |          |          |          |          |          |         |        |          |          |                                      |                                      |   |
|--------|---------------------------------------|------|----|----|-------|------|----------|----------|----------|----------|----------|---------|--------|----------|----------|--------------------------------------|--------------------------------------|---|
|        |                                       |      |    |    |       | 800  | 638.8226 | 1275.631 | 2        | 1275.631 | -0.0001  | 0       | 56.3   | 0.00036  | R        | DSDSILETLQR                          | K                                    |   |
|        |                                       |      |    |    |       | 801  | 638.8226 | 1275.631 | 2        | 1275.631 | 0.0001   | 0       | 65.16  | 4.70E-05 | R        | DSDSILETLQR                          | K                                    |   |
|        |                                       |      |    |    |       | 802  | 638.8227 | 1275.631 | 2        | 1275.631 | 0.0002   | 0       | 74.07  | 5.70E-06 | R        | DSDSILETLQR                          | K                                    |   |
|        |                                       |      |    |    |       | 803  | 638.8229 | 1275.631 | 2        | 1275.631 | 0.0007   | 0       | 62.85  | 7.10E-05 | R        | DSDSILETLQR                          | K                                    |   |
|        |                                       |      |    |    |       | 804  | 638.823  | 1275.631 | 2        | 1275.631 | 0.0008   | 0       | 49.13  | 0.0017   | R        | DSDSILETLQR                          | K                                    |   |
|        |                                       |      |    |    |       | 1257 | 828.89   | 1655.765 | 2        | 1655.765 | 0        | 0       | 95.65  | 2.00E-08 | R        | VVEVATFYTMYNR                        | K                                    |   |
|        |                                       |      |    |    |       | 1258 | 552.9291 | 1655.766 | 3        | 1655.765 | 0.0002   | 0       | 47.45  | 0.0013   | R        | VVEVATFYTMYNR                        | K                                    |   |
|        |                                       |      |    |    |       | 1259 | 828.8903 | 1655.766 | 2        | 1655.765 | -0.0007  | 0       | 95.78  | 2.10E-08 | R        | VVEVATFYTMYNR                        | K                                    |   |
|        |                                       |      |    |    |       | 1257 | 836.872  | 1671.76  | 2        | 1671.76  | -0.0004  | 0       | 93.19  | 2.90E-08 | R        | VVEVATFYTM@YNR                       | K                                    |   |
|        |                                       |      |    |    |       | 1269 | 558.2608 | 1671.761 | 3        | 1671.76  | 0.0003   | 0       | 58.73  | 7.90E-05 | R        | VVEVATFYTM@YNR                       | K                                    |   |
|        |                                       |      |    |    |       | 1270 | 836.888  | 1671.761 | 2        | 1671.76  | 0.0012   | 0       | 107.73 | 1.10E-09 | R        | VVEVATFYTM@YNR                       | K                                    |   |
|        |                                       |      |    |    |       | 1271 | 558.2611 | 1671.762 | 3        | 1671.76  | 0.0012   | 0       | 59.41  | 7.40E-05 | R        | VVEVATFYTM@YNR                       | K                                    |   |
|        |                                       |      |    |    |       | 1327 | 890.4214 | 1778.828 | 2        | 1778.827 | 0.0016   | 0       | 33.8   | 0.031    | K        | YHIQVCTTTTC@MLR                      | D                                    |   |
|        |                                       |      |    |    |       | 1341 | 898.4187 | 1794.823 | 2        | 1794.822 | 0.0013   | 0       | 61.29  | 5.10E-05 | K        | YHIQVCTTTTC@MBLR                     | D                                    |   |
|        |                                       |      |    |    |       | 1393 | 932.4343 | 1862.854 | 2        | 1862.854 | -0.0002  | 0       | 116.81 | 1.20E-10 | R        | FC'C'EPAGGLTSLTEPKK                  | G                                    |   |
|        |                                       |      |    |    |       | 1394 | 621.9587 | 1862.854 | 3        | 1862.854 | 0.0001   | 0       | 43.92  | 0.0023   | R        | FC'C'EPAGGLTSLTEPKK                  | G                                    |   |
|        |                                       |      |    |    |       | 1395 | 932.4348 | 1862.855 | 2        | 1862.854 | 0.0008   | 0       | 79.68  | 6.10E-07 | R        | FC'C'EPAGGLTSLTEPKK                  | G                                    |   |
|        |                                       |      |    |    |       | 1397 | 621.9592 | 1862.856 | 3        | 1862.854 | -0.0014  | 0       | 54.47  | 0.00021  | R        | FC'C'EPAGGLTSLTEPKK                  | G                                    |   |
|        |                                       |      |    |    |       | 1398 | 932.4355 | 1862.856 | 2        | 1862.854 | 0.0021   | 0       | 119.96 | 6.20E-11 | R        | FC'C'EPAGGLTSLTEPKK                  | G                                    |   |
|        |                                       |      |    |    |       | 1510 | 721.3836 | 2161.129 | 3        | 2161.128 | 0.001    | 0       | 38.74  | 0.0058   | K        | NYPEGHQAAALPVLDLAQR                  | O                                    |   |
|        |                                       |      |    |    |       | 1512 | 1081.572 | 2161.129 | 2        | 2161.128 | 0.0013   | 0       | 86.62  | 9.60E-08 | K        | NYPEGHQAAALPVLDLAQR                  | O                                    |   |
|        |                                       |      |    |    |       | 1513 | 721.3837 | 2161.129 | 3        | 2161.128 | 0.0014   | 0       | 54.29  | 0.00016  | K        | NYPEGHQAAALPVLDLAQR                  | O                                    |   |
|        |                                       |      |    |    |       | 1514 | 721.3839 | 2161.13  | 3        | 2161.128 | -0.0018  | 0       | 64.27  | 1.80E-05 | K        | NYPEGHQAAALPVLDLAQR                  | O                                    |   |
|        |                                       |      |    |    |       | 1515 | 1081.573 | 2161.132 | 2        | 2161.128 | 0.004    | 0       | 84.54  | 1.50E-07 | K        | NYPEGHQAAALPVLDLAQR                  | O                                    |   |
|        |                                       |      |    |    |       | 1582 | 1120.984 | 2239.954 | 2        | 2239.955 | -0.0011  | 0       | 86.68  | 4.30E-08 | R        | DTPENNDPTFFDFTPENYK                  | R                                    |   |
|        |                                       |      |    |    |       | 1583 | 747.6588 | 2239.955 | 3        | 2239.955 | 0        | 0       | 40.74  | 0.0019   | R        | DTPENNDPTFFDFTPENYK                  | R                                    |   |
|        |                                       |      |    |    |       | 1585 | 1120.985 | 2239.955 | 2        | 2239.955 | 0.0001   | 0       | 80.01  | 2.10E-07 | R        | DTPENNDPTFFDFTPENYK                  | R                                    |   |
|        |                                       |      |    |    |       | 1586 | 1120.985 | 2239.955 | 2        | 2239.955 | 0.0001   | 0       | 40.3   | 0.0019   | R        | DTPENNDPTFFDFTPENYK                  | R                                    |   |
|        |                                       |      |    |    |       | 1673 | 1199.034 | 2396.054 | 2        | 2396.056 | -0.0014  | 1       | 39.34  | 0.0032   | R        | DTPENNDPTFFDFTPENYK                  | I                                    |   |
|        |                                       |      |    |    |       | 1675 | 799.6927 | 2396.056 | 3        | 2396.056 | 0.0006   | 1       | 47.36  | 0.00049  | R        | DTPENNDPTFFDFTPENYK                  | I                                    |   |
|        |                                       |      |    |    |       | 1676 | 799.6927 | 2396.056 | 3        | 2396.056 | 0.0007   | 1       | 57.24  | 5.00E-05 | R        | DTPENNDPTFFDFTPENYK                  | I                                    |   |
|        |                                       |      |    |    |       | 1715 | 1374.162 | 2746.31  | 2        | 2746.31  | -0.0006  | 1       | 54.33  | 0.00015  | R        | FC'C'EPAGGLTSLTEPKKPGFQVQAGL         | -                                    |   |
|        |                                       |      |    |    |       | 1716 | 916.4442 | 2746.311 | 3        | 2746.31  | 0.0011   | 1       | 74.36  | 1.50E-06 | R        | FC'C'EPAGGLTSLTEPKKPGFQVQAGL         | -                                    |   |
|        |                                       |      |    |    |       | 1719 | 916.4452 | 2746.314 | 3        | 2746.31  | 0.0042   | 1       | 66.21  | 9.70E-06 | R        | FC'C'EPAGGLTSLTEPKKPGFQVQAGL         | -                                    |   |
|        |                                       |      |    |    |       | 1832 | 937.2011 | 3744.775 | 4        | 3744.773 | 0.0028   | 0       | 58.6   | 3.00E-05 | K        | LFTLIEVECLGACV@VQINDNYEDLTPK         | D                                    |   |
|        |                                       |      |    |    |       | 1869 | 1140.053 | 4556.184 | 4        | 4556.18  | 0.0037   | 1       | 34.51  | 0.0043   | K        | VGETTPDKLFTLIEVECLGACV@VQINDNYEDLTPK | D                                    |   |
|        |                                       |      |    |    |       | 1870 | 1144.053 | 4572.184 | 4        | 4572.175 | 0.0088   | 1       | 68.27  | 2.9E-06  | K        | VGETTPDKLFTLIEVECLGACV@VQINDNYEDLTPK | D                                    |   |
| Q00623 | Apolipoprotein A-I                    | 1009 | 36 | 18 | 30569 | 5.64 | 102      | 422.2377 | 842.4609 | 2        | 842.461  | -0.0001 | 0      | 38.46    | 0.021    | K                                    | LOEQLGR                              | L |
|        |                                       |      |    |    |       |      | 371      | 520.7952 | 1039.576 | 2        | 1039.577 | -0.0016 | 0      | 38.59    | 0.013    | K                                    | ARPALEDLR                            | H |
|        |                                       |      |    |    |       |      | 395      | 524.2772 | 1046.54  | 2        | 1046.54  | 0.0001  | 0      | 55.77    | 0.00048  | R                                    | LSPVAEFR                             | D |
|        |                                       |      |    |    |       |      | 414      | 533.7458 | 1065.477 | 2        | 1065.477 | 0.0004  | 0      | 44.1     | 0.0037   | R                                    | DRWDLK                               | E |
|        |                                       |      |    |    |       |      | 463      | 550.3136 | 1098.613 | 2        | 1098.615 | -0.0019 | 1      | 38.33    | 0.016    | R                                    | QKLEQLGR                             | L |
|        |                                       |      |    |    |       |      | 697      | 619.314  | 1236.614 | 2        | 1236.614 | -0.0004 | 1      | 35.38    | 0.041    | K                                    | WKEDVELYR                            | Q |
|        |                                       |      |    |    |       |      | 698      | 619.3143 | 1236.614 | 2        | 1236.614 | 0.0003  | 1      | 39.14    | 0.017    | K                                    | WKEDVELYR                            | Q |
|        |                                       |      |    |    |       |      | 699      | 413.2121 | 1236.614 | 3        | 1236.614 | 0.0005  | 1      | 43.24    | 0.0063   | K                                    | WKEDVELYR                            | Q |
|        |                                       |      |    |    |       |      | 701      | 413.2122 | 1236.615 | 3        | 1236.614 | 0.0008  | 1      | 42.3     | 0.0078   | K                                    | WKEDVELYR                            | Q |
|        |                                       |      |    |    |       |      | 714      | 620.8137 | 1239.613 | 2        | 1239.614 | -0.0007 | 0      | 64.01    | 4.40E-05 | K                                    | DFANVYVDAVK                          | D |
|        |                                       |      |    |    |       |      | 715      | 620.8141 | 1239.614 | 2        | 1239.614 | 0.0001  | 0      | 57.81    | 0.00017  | K                                    | DFANVYVDAVK                          | D |
|        |                                       |      |    |    |       |      | 716      | 620.8147 | 1239.615 | 2        | 1239.614 | 0.0013  | 0      | 68       | 1.60E-05 | K                                    | DFANVYVDAVK                          | D |
|        |                                       |      |    |    |       |      | 790      | 633.8219 | 1295.629 | 2        | 1295.629 | -0.0002 | 0      | 40.81    | 0.01     | K                                    | VQPYLDFQK                            | K |
|        |                                       |      |    |    |       |      | 849      | 649.3185 | 1296.623 | 2        | 1296.625 | -0.0019 | 0      | 51.64    | 0.00082  | R                                    | TQLAPHSEQMR                          | E |
|        |                                       |      |    |    |       |      | 850      | 649.3187 | 1296.623 | 2        | 1296.625 | -0.0016 | 0      | 34.3     | 0.048    | R                                    | TQLAPHSEQMR                          | E |
|        |                                       |      |    |    |       |      | 890      | 657.3159 | 1312.617 | 2        | 1312.619 | -0.0022 | 0      | 52.93    | 0.00046  | R                                    | TQLAPHSEQMR                          | E |
|        |                                       |      |    |    |       |      | 892      | 657.316  | 1312.617 | 2        | 1312.619 | -0.002  | 0      | 45.4     | 0.0027   | R                                    | TQLAPHSEQMR                          | E |
|        |                                       |      |    |    |       |      | 896      | 439.5469 | 1312.619 | 3        | 1312.619 | -0.0004 | 0      | 33.02    | 0.044    | R                                    | TQLAPHSEQMR                          | E |
|        |                                       |      |    |    |       |      | 902      | 439.2298 | 1314.668 | 3        | 1314.668 | 0       | 0      | 43.35    | 0.0052   | R                                    | HSLM@PMLLETK                         | T |
|        |                                       |      |    |    |       |      | 903      | 658.3411 | 1314.668 | 2        | 1314.668 | 0.0001  | 0      | 49.46    | 0.0013   | R                                    | HSLM@PMLLETK                         | T |
|        |                                       |      |    |    |       |      | 905      | 658.3412 | 1314.668 | 2        | 1314.668 | 0.0004  | 0      | 56.25    | 0.00029  | R                                    | HSLM@PMLLETK                         | T |
|        |                                       |      |    |    |       |      | 906      | 439.23   | 1314.668 | 3        | 1314.668 | 0.0005  | 0      | 40.88    | 0.01     | R                                    | HSLM@PMLLETK                         | T |
|        |                                       |      |    |    |       |      | 907      | 658.3414 | 1314.668 | 2        | 1314.668 | 0.0006  | 0      | 40.17    | 0.012    | R                                    | HSLM@PMLLETK                         | T |
|        |                                       |      |    |    |       |      | 940      | 666.3195 | 1330.624 | 2        | 1330.627 | -0.0022 | 0      | 53.57    | 0.00036  | K                                    | SNPTLNEYHTR                          | A |
|        |                                       |      |    |    |       |      | 947      | 444.5604 | 1330.659 | 3        | 1330.663 | -0.0032 | 0      | 40.91    | 0.0085   | R                                    | HSLM@PM@LETK                         | T |
|        |                                       |      |    |    |       |      | 952      | 444.5616 | 1330.663 | 3        | 1330.663 | 0.0005  | 0      | 40.59    | 0.011    | R                                    | HSLM@PM@LETK                         | T |
|        |                                       |      |    |    |       |      | 965      | 670.8618 | 1339.709 | 2        | 1339.71  | -0.0005 | 0      | 86.21    | 2.10E-07 | K                                    | VAPLGAELQESAR                        | Q |
|        |                                       |      |    |    |       |      | 966      | 670.8619 | 1339.709 | 2        | 1339.71  | -0.0003 | 0      | 79.97    | 9.00E-07 | K                                    | VAPLGAELQESAR                        | Q |
|        |                                       |      |    |    |       |      | 968      | 670.862  | 1339.709 | 2        | 1339.71  | -0.0001 | 0      | 90.49    | 7.80E-08 | K                                    | VAPLGAELQESAR                        | Q |
|        |                                       |      |    |    |       |      | 970      | 670.8622 | 1339.71  | 2        | 1339.71  | 0.0004  | 0      | 40.44    | 0.0069   | K                                    | VAPLGAELQESAR                        | Q |
|        |                                       |      |    |    |       |      | 1040     | 689.8285 | 1377.842 | 2        | 1377.845 | -0.0021 | 1      | 49.47    | 0.0011   | R                                    | QEM@NDLEEK                           | Q |
|        |                                       |      |    |    |       |      | 1165     | 489.9326 | 1466.776 | 3        | 1466.777 | -0.0009 | 1      | 36.34    | 0.018    | K                                    | VKDFANVYVDAVK                        | D |
|        |                                       |      |    |    |       |      | 1166     | 734.3953 | 1466.776 | 2        | 1466.777 | -0.0008 | 1      | 74.73    | 2.50E-06 | K                                    | VKDFANVYVDAVK                        | D |
|        |                                       |      |    |    |       |      | 1852     | 1366.999 | 1654.796 | 3        | 1654.795 | 0.0006  | 1      | 42.68    | 0.0041   | K                                    | DFANVYVDAVKDSCR                      | D |
|        |                                       |      |    |    |       |      | 1853     | 1025.502 | 4097.98  | 4        | 4097.982 | -0.0009 | 0      | 51.32    | 0.00013  | R                                    | DVVSQFESSLSGQGLN@LLENWDTLGTSTV@SOLQR | L |
|        |                                       |      |    |    |       |      | 82       | 417.222  | 832.4294 | 2        | 832.429  | 0.0003  | 0      | 43.43    | 0.012    | R                                    | SVEETLR                              | L |
| P20108 | Thioredoxin-dependent peroxide reduct | 183  | 6  | 6  | 28109 | 7.15 | 336      | 511.2689 | 1020.523 | 2        | 1020.524 | -0.0008 | 0      | 58.61    | 0.00023  | K                                    | GTAVVNGEKF                           | E |
|        |                                       |      |    |    |       |      | 643      | 603.8332 | 1205.652 | 2        | 1205.652 | 0.0002  | 0      | 43.7     | 0.0045   | K                                    | HLSVNDLPVGR                          | S |
|        |                                       |      |    |    |       |      | 793      | 636.3716 | 1270.729 | 2        | 1270.729 | 0.0001  | 0      | 56.91    | 0.00013  | R                                    | GLFIDP@NGVYK                         | H |
|        |                                       |      |    |    |       |      | 1177     | 738.9073 | 1475.8   | 2        | 1475.798 | 0.0018  | 0      | 50.49    | 0.00069  | R                                    | DY@VLLSAGIALR                        | G |
|        |                                       |      |    |    |       |      | 1755     | 1011.177 | 3030.508 | 3        | 3030.513 | -0.0047 | 0      | 60.71    | 2.30E-05 | K                                    | YLVLFYPLDFTFVC@PTEINAFSDK            | A |



**SUPPLEMENTAL TABLE S2 - Identities of proteins differentially expressed with or without cell therapy**

| Spot#                                              | Protein ID                                                                                    | Gene Name | Accession # | Fold change | Mass  | pI    | Cell location/complex    | Biological process or functional role                                          | Notes |
|----------------------------------------------------|-----------------------------------------------------------------------------------------------|-----------|-------------|-------------|-------|-------|--------------------------|--------------------------------------------------------------------------------|-------|
| 56                                                 | 14-3-3 protein beta/alpha                                                                     | YWHA8     | Q9CQV8      | -2.05       | 28069 | 4.77  | cytoplasm                | signaling regulation                                                           |       |
| 50                                                 | 14-3-3 protein epsilon                                                                        | YWHAE     | P62259      | -3.45       | 29155 | 4.63  | cytoplasm                | signaling regulation                                                           |       |
| 33                                                 | 26S protease regulatory subunit 8                                                             | PSM3C     | P62196      | -5.39       | 45597 | 7.11  | cytoplasm, nucleus       | protein degradation                                                            |       |
| 27                                                 | 26S proteasome non-ATPase regulatory subunit 13                                               | PSM2D13   | Q9N1W2      | -1.82       | 42782 | 6.71  | cytoplasm, nucleus       | protein degradation                                                            |       |
| 66                                                 | 26S proteasome non-ATPase regulatory subunit 9                                                | PSM9D     | Q9C900      | -4.11       | 24705 | 6.00  | nucleus                  | protein degradation                                                            |       |
| 95                                                 | 28S ribosomal protein S36, mitochondrial                                                      | MRPS36    | Q9CQX8      | -19447      | 11094 | 9.99  | mitochondria             | mitochondrial small ribosomal subunit                                          |       |
| 28                                                 | 2-oxoisovalerate dehydrogenase subunit alpha, 27 (2',5'-biphosphate nucleoidase 1)            | BCKDHA    | P50136      | -4.27       | 45674 | 6.05  | mitochondria             | amino acid catabolism                                                          |       |
| 27                                                 | 3-(2',5'-biphosphate nucleoidase 1)                                                           | BNPT1     | Q9Z0S1      | -1.82       | 33175 | 5.54  | unknown                  | phosphatidylinositol phosphorylation                                           |       |
| 68, 70, 81                                         | 3,2-trans-enoyl-CoA isomerase, mitochondrial                                                  | DCI       | P42125      | -4.00       | 29110 | 7.77  | mitochondria             | fatty acid beta-oxidation                                                      |       |
| 54                                                 | 3-hydroxybutyrate dehydrogenase, mitochondrial                                                | HIBADH    | Q9B171      | 39.87       | 37474 | 6.71  | mitochondria             | pentose phosphate metabolism                                                   |       |
| 29, 32, 33, 35, 36                                 | 3-ketoacyl-CoA thiolase, mitochondrial                                                        | ACAA2     | Q9BWT1      | -1.53       | 41831 | 8.33  | mitochondria             | fatty acid, lipid metabolism                                                   |       |
| 25                                                 | 40S ribosomal protein SA                                                                      | RP5A      | P14206      | -1.94       | 32817 | 4.80  | cytoplasm, nucleus, memb | cytosolic small ribosomal subunit                                              |       |
| 8, 17                                              | 60 kDa heat shock protein, mitochondrial                                                      | HSPD1     | P63038      | -2.35       | 60917 | 5.91  | mitochondria             | protein import, folding, and assembly                                          |       |
| 41, 42, 43                                         | 60S acidic ribosomal protein P0                                                               | RPLP0     | P14869      | -4.14       | 34195 | 5.91  | cytoplasm, nucleus       | cytosolic large ribosomal subunit                                              |       |
| 90                                                 | 60S acidic ribosomal protein P2                                                               | RPLP2     | P99227      | -15155      | 11644 | 4.42  | cytoplasm, nucleus       | cytosolic large ribosomal subunit                                              |       |
| 7                                                  | 6-phosphofruktokinase                                                                         | PFKB      | P47857      | 2.21        | 85215 | 6.21  | cytoplasm                | carbohydrate catabolism                                                        |       |
| 60                                                 | 6-phosphogluconolactonase                                                                     | PGLS      | Q9CQ60      | -4.60       | 27237 | 5.55  | cytoplasm                | carbohydrate catabolism                                                        |       |
| 30, 37                                             | Acetyl-CoA acetyltransferase, mitochondrial                                                   | ACAT1     | Q8QZT1      | -7.40       | 44787 | 8.71  | mitochondria             | ketone body metabolism                                                         |       |
| 3, 4, 5, 6, 7                                      | Aconitate hydratase, mitochondrial                                                            | ACO2      | Q99K10      | 2.32        | 85410 | 8.08  | mitochondria             | carbohydrate catabolism                                                        |       |
| 28, 29                                             | Actin, alpha cardiac muscle 1                                                                 | ACTC1     | P68033      | -4.16       | 41992 | 5.23  | contractile apparatus    | cardiac muscle contraction, cytoskeleton                                       |       |
| 8, 9, 10                                           | Actin, aortic smooth muscle                                                                   | ACTA2     | P62737      | -3.63       | 41992 | 5.23  | contractile apparatus    | smooth muscle contraction, cytoskeleton                                        |       |
| 25                                                 | Actin, cytoplasmic 1                                                                          | ACTB      | P68110      | -173.26     | 41710 | 5.29  | cytoskeleton             | cytoskeleton                                                                   |       |
| 91, 94                                             | Acyl-coenzyme A thioesterase 13                                                               | ACOT13    | Q9C9C4      | -6.51       | 15173 | 8.95  | cytoplasm, mitochondria  | fatty acid metabolism                                                          |       |
| 29                                                 | Acyl-coenzyme A thioesterase 2                                                                | ACOT2     | Q9QYR9      | -4.00       | 49621 | 6.21  | cytoplasm, mitochondria  | fatty acid metabolism                                                          |       |
| 34                                                 | Acyl-coenzyme A thioesterase 9, mitochondrial                                                 | ACOT9     | Q9R0X4      | -1.68       | 50528 | 8.74  | cytoplasm, mitochondria  | fatty acid metabolism                                                          |       |
| 29                                                 | Adenosine kinase                                                                              | ADK       | P55264      | -4.00       | 40123 | 5.84  | cytoplasm                | purine metabolism                                                              |       |
| 28                                                 | Adenosylhomocysteinase                                                                        | AHCY      | PS9247      | -4.30       | 47057 | 6.08  | cytoplasm                | one-carbon metabolism                                                          |       |
| 68, 69                                             | Adenylylate kinase 2, mitochondrial                                                           | AK2       | Q9W7P6      | -1.23       | 29552 | 6.86  | mitochondria             | nucleotide metabolism                                                          |       |
| 62, 63, 76                                         | Adenylylate kinase isoenzyme 1                                                                | AK1       | Q9R0Y5      | -2.26       | 21526 | 5.67  | cytoplasm                | nucleotide metabolism                                                          |       |
| 51                                                 | Adiponectin                                                                                   | ADIPOQ    | Q60994      | -2.20       | 26842 | 5.30  | secreted                 | fat metabolism                                                                 |       |
| 44                                                 | Alcohol dehydrogenase [NADP+]                                                                 | AKR1A1    | Q9J116      | -3.44       | 36545 | 6.90  | cytoplasm                | alcohol metabolism                                                             |       |
| 31                                                 | Alcohol dehydrogenase class-3                                                                 | ADH5      | P28474      | -7.58       | 39522 | 6.97  | cytoplasm                | alcohol metabolism                                                             |       |
| 41, 42, 43                                         | Aldehyde reductase                                                                            | AKR1B1    | P45376      | -2.14       | 35709 | 6.71  | cytoplasm                | aldehyde reductase, metabolism                                                 |       |
| 29                                                 | Alpha-centractin                                                                              | ACTR1A    | P61164      | -4.00       | 42587 | 6.19  | cytoskeleton, cytoplasm  | cytoskeleton, microtubule based vesicle motility                               |       |
| 83, 84                                             | Alpha-crystallin B chain                                                                      | CRYAB     | P23927      | -5.06       | 20056 | 6.76  | cytoplasm, nucleus       | chaperone, prevents aggregation of various proteins                            |       |
| 19                                                 | Annexin A11                                                                                   | ANXA11    | P97384      | 2.62        | 54077 | 7.53  | cytoplasm, nucleus       | cytokinesis                                                                    |       |
| 42, 43, 46                                         | Annexin A2                                                                                    | ANXA2     | P07356      | -3.41       | 38652 | 7.55  | secreted                 | extracellular matrix, basement membrane                                        |       |
| 9                                                  | Annexin A7                                                                                    | ANXA7     | Q07076      | -2.14       | 49807 | 5.91  | membrane, cytoplasm      | promotes membrane fusion, involved in exocytosis                               |       |
| 97                                                 | Apolipoprotein A-I                                                                            | APOA1     | P04781      | 1.45        | 30561 | 5.44  | secreted                 | reverse transport of cholesterol                                               |       |
| 59                                                 | Apolipoprotein A-I-binding protein                                                            | APOA1BP   | Q8K4Z3      | -2.47       | 30953 | 7.59  | secreted                 | Interacts with APOA1, APOA2                                                    |       |
| 30, 37                                             | Aspartate aminotransferase, cytoplasmic                                                       | GOT1      | P05201      | -63.26      | 46202 | 6.68  | cytoplasm                | amino acid biosynthesis                                                        |       |
| 30, 37                                             | Aspartate aminotransferase, mitochondrial                                                     | GOT2      | P05202      | -63.26      | 47381 | 9.13  | mitochondria             | amino acid biosynthesis                                                        |       |
| 12, 13, 14, 15, 16, 17, 18, 19, 20, 21, 22, 23, 24 | ATP synthase subunit alpha, mitochondrial                                                     | ATPSA1    | Q03265      | 7.22        | 55310 | 8.28  | mitochondria             | oxidative phosphorylation complex V                                            |       |
| 8, 9                                               | ATP synthase subunit beta, mitochondrial                                                      | ATPSB     | P56480      | -3.10       | 56265 | 5.20  | mitochondria             | oxidative phosphorylation complex V                                            |       |
| 90                                                 | ATP synthase subunit delta, mitochondrial                                                     | ATPSD     | Q9DQD9      | -15155      | 17489 | 5.03  | mitochondria             | oxidative phosphorylation complex V                                            |       |
| 96                                                 | ATP synthase subunit gamma, mitochondrial                                                     | ATP5C1    | Q91VR2      | -13.61      | 32865 | 9.06  | mitochondria             | oxidative phosphorylation complex V                                            |       |
| 86                                                 | ATP synthase subunit O, mitochondrial                                                         | ATPSO     | Q9DBD20     | 9.60        | 23349 | 10.00 | mitochondria             | oxidative phosphorylation complex V                                            |       |
| 34, 36                                             | Beta-enolase                                                                                  | ENO3      | P21550      | -2.10       | 46995 | 6.73  | cytoplasm                | glycolysis                                                                     |       |
| 13, 16                                             | Bifunctional purine biosynthesis protein PURH                                                 | ATIC      | Q9C9J9      | 6.80        | 64177 | 6.30  | cytoplasm                | purine biosynthesis                                                            |       |
| 68                                                 | Bisphosphoglycerate mutase                                                                    | BPGM      | P19537      | -4.10       | 29562 | 6.87  | cytoplasm                | glycolysis                                                                     |       |
| 10                                                 | Calcineurin-2                                                                                 | CASQ2     | Q09161      | -8.00       | 48167 | 4.12  | sarcoplasmic reticulum   | regulation of cardiac muscle contraction by calcium sequestration              |       |
| 68, 70                                             | Carbonic anhydrase 1                                                                          | CA1       | P13634      | -5.32       | 28303 | 6.44  | cytoplasm                | one-carbon metabolism                                                          |       |
| 65, 66                                             | Carbonic anhydrase 2                                                                          | CA2       | P00920      | -5.35       | 29014 | 6.49  | cytoplasm                | one-carbon metabolism                                                          |       |
| 71, 72                                             | Carboxymethyleneubiquitinase homolog                                                          | CMBL      | Q8R1G2      | -3.20       | 27884 | 6.71  | cytoplasm                | hydrolase                                                                      |       |
| 12, 13, 15, 16                                     | Carnitine O-acetyltransferase                                                                 | CRAT      | P47934      | 22.40       | 70879 | 8.52  | endoplasmic reticulum    | fatty acid, lipid metabolism                                                   |       |
| 31                                                 | Cat eye syndrome critical region protein 5 homolog                                            | CECR5     | Q91VM2      | -7.58       | 44930 | 7.35  | unknown                  | cytoskeleton                                                                   |       |
| 17                                                 | Catalase                                                                                      | CAT       | P24270      | 9.17        | 59728 | 7.72  | peroxisome               | hydrogen peroxide catabolism                                                   |       |
| 62, 63                                             | Catechol O-methyltransferase                                                                  | COMT      | Q88587      | -2.09       | 29477 | 5.52  | cytoplasm                | catecholamine metabolism                                                       |       |
| 94                                                 | CDGSH iron sulfur domain-containing protein 1                                                 | CISD1     | Q91WS0      | -9.05       | 12089 | 9.17  | mitochondria             | oxidative phosphorylation (Fe-S cluster regulation)                            |       |
| 53                                                 | Citrate lyase subunit beta-like protein, mitochondrial                                        | CLYBL     | Q8R4N0      | -2.44       | 35412 | 7.78  | mitochondria             | aromatic compound metabolism                                                   |       |
| 35, 36                                             | Citrate synthase, mitochondrial                                                               | CS        | Q9CZU6      | 1.67        | 51703 | 8.72  | mitochondria             | tricarboxylic acid cycle                                                       |       |
| 89                                                 | Cofilin-1                                                                                     | CFL1      | P18760      | -1.90       | 18548 | 8.22  | cytoskeleton             | regulates actin cytoskeleton dynamics, cytokinesis                             |       |
| 96                                                 | Coiled-coil-helix-coiled-coil-helix domain-containing protein 3                               | CHCHD3    | Q9CRB9      | -13.61      | 26318 | 8.56  | mitochondria             | maint. of mito crista integrity and function, regulation of BAG1 transcription |       |
| 93                                                 | COX assembly mitochondrial protein homolog                                                    | CMC1      | Q9CPZ8      | 107.01      | 12544 | 8.52  | mitochondria             | oxidative phosphorylation (COX assembly)                                       |       |
| 28                                                 | Creatine kinase B-type                                                                        | CKB       | Q04447      | -4.27       | 42886 | 5.40  | cytoplasm                | energy transduction (phosphate)                                                |       |
| 29, 32, 33                                         | Creatine kinase M-type                                                                        | CKM       | P07310      | -3.55       | 43018 | 6.58  | cytoplasm                | energy transduction (phosphate)                                                |       |
| 35                                                 | Creatine kinase, sarcomeric mitochondrial                                                     | CKMT2     | Q9P9L7      | 1.67        | 47443 | 8.64  | cytoplasm                | energy transduction (phosphate)                                                |       |
| 32                                                 | Cysteine desulfurase, mitochondrial                                                           | NFS1      | Q9Z1L3      | -3.01       | 45348 | 6.86  | mitochondria             | cysteine biosynthesis                                                          |       |
| 1                                                  | Cysteine-IRNA synthetase, cytoplasmic                                                         | CARS      | Q8ER72      | -2.19       | 94800 | 6.32  | cytoplasm                | protein biosynthesis, cysteine tRNA aminoacylation                             |       |
| 9, 10                                              | Cytochrome b-c1 complex subunit 1                                                             | UQCRC1    | Q9CZ13      | -3.66       | 52735 | 5.75  | mitochondria             | oxidative phosphorylation complex III                                          |       |
| 36                                                 | Cytochrome b-c1 complex subunit 2, mitochondrial                                              | UQCRC2    | Q9DB77      | -3.40       | 48205 | 9.26  | mitochondria             | oxidative phosphorylation complex III                                          |       |
| 95                                                 | Cytochrome b-c1 complex subunit 7                                                             | UQCRC7    | Q8D655      | -19447      | 13519 | 9.10  | mitochondria             | oxidative phosphorylation complex III                                          |       |
| 79, 80                                             | Cytochrome b-c1 complex subunit Rieske, mitochondrial                                         | UQCRCF1   | Q8QRC6      | -4.16       | 29349 | 8.91  | mitochondria             | oxidative phosphorylation complex III                                          |       |
| 54, 55                                             | Cytochrome c1, heme protein, mitochondrial                                                    | CYC1      | Q9D0M3      | -2.03       | 27276 | 6.50  | mitochondria             | oxidative phosphorylation complex III                                          |       |
| 10                                                 | Cytosolic non-specific dipeptidase                                                            | CNDP2     | Q9D1A2      | -7.95       | 52734 | 5.43  | cytoplasm                | proteolysis                                                                    |       |
| 11, 12                                             | Delta-1-pyrroline-5-carboxylate dehydrogenase                                                 | ALDH4A1   | Q8CHT0      | 5.12        | 61772 | 8.58  | mitochondria             | proline metabolism                                                             |       |
| 41                                                 | Delta-aminolevulinic acid dehydratase                                                         | ALAD      | P10518      | -5.83       | 36300 | 6.32  | cytoplasm                | heme biosynthesis (porphyrin metabolism)                                       |       |
| 89                                                 | Destrin                                                                                       | DSTN      | Q9R0P5      | -1.90       | 18509 | 8.14  | cytoskeleton             | actin filament depolymerization                                                |       |
| 12, 15                                             | Dihydropyridine-residue acetyltransferase component of pyruvate dehydrogenase complex         | DLAT      | Q8BMF4      | 65.10       | 67899 | 8.81  | mitochondria             | tricarboxylic acid cycle                                                       |       |
| 18                                                 | Dihydropyridine-residue succinyltransferase component of 2-oxoglutarate dehydrogenase complex | DLS1      | Q9D2G2      | -7.34       | 48963 | 9.11  | mitochondria             | tricarboxylic acid cycle                                                       |       |
| 68, 70                                             | Dihydropteridine reductase                                                                    | QDPR      | Q8BV14      | -5.32       | 25554 | 7.67  | mitochondria             | tetrahydropterin biosynthesis                                                  |       |
| 13                                                 | Dihydroxyimino-lysine-related protein 2                                                       | DDPSL2    | Q8H553      | 5.00        | 62239 | 5.95  | cytoplasm                | cytoskeleton organization                                                      |       |
| 83                                                 | Dual specificity protein phosphatase 3                                                        | DUSP3     | Q9D7X3      | -6.11       | 20459 | 5.07  | nucleus                  | dephosphorylates ERK1 and ERK2                                                 |       |
| 9                                                  | Dynactin subunit 2                                                                            | DCTN2     | Q9KJL8      | -2.14       | 44090 | 5.14  | cytoplasm, cytoskeleton  | mitotic spindle organization                                                   |       |
| 51                                                 | E-hand domain-containing protein D2                                                           | EFHD2     | Q9D8Y0      | -2.20       | 26775 | 5.01  | membrane                 | negative regulator of canonical NF-kappa-B-activating branch                   |       |
| 53, 54                                             | Electron transfer flavoprotein subunit alpha, mitochondrial                                   | ETF1      | Q99LC5      | 39.87       | 32366 | 7.10  | mitochondria             | mitochondrial electron transfer                                                |       |
| 81, 96                                             | Electron transfer flavoprotein subunit beta, mitochondrial                                    | ETF2      | Q9DQW4      | 68.42       | 27606 | 8.24  | mitochondria             | mitochondrial electron transfer                                                |       |
| 12, 13, 16                                         | Electron transfer flavoprotein-ubiquinone oxidoreductase                                      | ETF1B     | Q9DQW9      | -3.45       | 24678 | 4.53  | cytoplasm                | mitochondrial electron transfer                                                |       |
| 50                                                 | Elongation factor 1-beta                                                                      | EEF1B     | P07025      | -3.45       | 24678 | 4.53  | cytoplasm                | protein biosynthesis, translation elongation                                   |       |
| 39                                                 | Elongation factor 1-delta                                                                     | EEF1D     | P57776      | -3.80       | 31274 | 4.91  | cytoplasm                | protein biosynthesis, translation elongation                                   |       |
| 1, 2                                               | Elongation factor G 1, mitochondrial                                                          | GFM1      | Q8K0D5      | -3.05       | 83496 | 6.48  | mitochondria             | protein biosynthesis, translation elongation                                   |       |
| 52                                                 | Elongation factor Ts, mitochondrial                                                           | TSFM      | Q9CZR8      | -4.37       | 35312 | 6.62  | mitochondria             | protein biosynthesis, translation elongation                                   |       |
| 28, 29, 33                                         | Elongation factor Tu, mitochondrial                                                           | TUFM      | Q8BFR5      | -4.61       | 49477 | 7.23  | mitochondria             | protein biosynthesis, translation elongation                                   |       |
| 65                                                 | Enoyl-CoA hydratase domain-containing protein 2, mitochondrial                                | ECHDC2    | Q9H202      | -1.54       | 31832 | 6.34  | mitochondria             | fatty acid, lipid metabolism                                                   |       |
| 68, 69, 70, 81                                     | Enoyl-CoA hydratase, mitochondrial                                                            | ECHS1     | Q8H9S5      | -3.49       | 31454 | 8.76  | mitochondria             | fatty acid, lipid metabolism                                                   |       |
| 17                                                 | Epoxide hydrolase 2                                                                           | EPHX2     | P34914      | 9.17        | 29755 | 7.63  | cytoplasm, peroxisome    | aromatic hydrocarbon catabolism, lipid metabolism                              |       |
| 91, 92, 93                                         | Fatty acid-binding protein, adipocyte                                                         | FABP4     | P04117      | 270.24      | 28474 | 7.78  | cytoplasm, nucleus       | lipid transport chaperone                                                      |       |
| 79, 80                                             | Flavin reductase                                                                              | BLVRB     | Q9Z3D2      | -4.16       | 22183 | 6.49  | cytoplasm                | oxidoreductase, NADPH-dependent flavin reduction                               |       |
| 37, 38                                             | Fructose-bisphosphate aldolase A                                                              | ALDOA     | P05064      | -8.10       | 39331 | 8.31  | cytoplasm                | glycolysis                                                                     |       |
| 20, 34, 36                                         | Fumarate hydratase, mitochondrial                                                             | FH        | P97807      | -2.10       | 49935 | 7.88  | mitochondria             | tricarboxylic acid cycle                                                       |       |
| 53                                                 | Fumarate hydratase domain-containing protein 2A                                               | FAHD2     | Q3TC72      | -2.44       | 31919 | 6.42  | mitochondria             | hydrolase                                                                      |       |
| 20, 21, 22                                         | Glutamate dehydrogenase 1, mitochondrial                                                      | GLUD1     | P28443      | 9.50        | 55912 | 6.71  | mitochondria             | tricarboxylic acid cycle, glutamine anaplerosis                                |       |
| 32                                                 | Glutamine synthetase                                                                          | GLUL      | P15105      | 3.01        | 42092 | 6.64  | cytoplasm, mitochondria  | glutamine biosynthesis                                                         |       |
| 26, 27                                             | Glutaredoxin-2                                                                                | GLRX3     | Q9D0A9      | -2.17       | 37745 | 5.42  | cytoplasm                | oxidoreductase                                                                 |       |
| 76                                                 | Glutathione peroxidase 1                                                                      | GPX1      | P11352      | -2.52       | 22316 | 6.74  | cytoplasm                | oxidoreductase                                                                 |       |
| 72, 77, 82                                         | Glutathione S-transferase Mu 1                                                                | GSTM1     | P10649      | -3.10       | 25953 | 7.71  | cytoplasm                | oxidoreductase                                                                 |       |
| 79                                                 | Glutathione S-transferase Mu 2                                                                | GSTM2     | P15626      | -6.44       | 25700 | 6.90  | cytoplasm                | oxidoreductase                                                                 |       |
| 73                                                 | Glutathione S-transferase Mu 5                                                                | GSTM5     | P48774      | -3.80       | 26617 | 6.82  | cytoplasm                | oxidoreductase                                                                 |       |
| 55                                                 | Glutathione S-transferase omega-1                                                             | GSTO1     | Q09131      | -2.06       | 27480 | 6.92  | cytoplasm                | oxidoreductase                                                                 |       |
| 43, 47, 48, 49                                     | Glyceroldehyde-3-phosphate dehydrogenase                                                      | GAPDH     | P16858      | -3.27       | 35787 | 8.45  | cytoplasm                | glycolysis                                                                     |       |

|                            |                                                                         |           |        |         |       |       |                         |                                                                        |
|----------------------------|-------------------------------------------------------------------------|-----------|--------|---------|-------|-------|-------------------------|------------------------------------------------------------------------|
| 29,30,32                   | Medium-chain specific acyl-CoA dehydrogenase                            | ACADM     | P49592 | -3.03   | 43592 | 7.69  | mitochondria            | fatty acid beta-oxidation                                              |
| 59                         | Metaxin-2                                                               | MTX2      | O88441 | -2.47   | 29739 | 5.44  | mitochondria            | protein transport into mitochondria                                    |
| 3                          | Methylcrotonoyl-CoA carboxylase subunit alpha                           | MCCC1     | Q99MR8 | -2.82   | 79293 | 7.70  | mitochondria            | leucine catabolism                                                     |
| 18,19                      | Methylmalonate-semialdehyde dehydrogenase [acylating], mitochondrial    | ALDH6A1   | Q9EQ20 | 2.62    | 54605 | 7.02  | mitochondria            | valine and pyrimidine metabolism                                       |
| 27                         | Methylthiobiose-1-phosphate isomerase                                   | MR11      | Q9CQT1 | -1.82   | 39386 | 5.60  | cytoplasm               | methionine biosynthesis via salvage pathway                            |
| 13                         | Mitochondrial inner membrane protein                                    | IMMT      | Q8CA08 | 5.00    | 83848 | 6.18  | mitochondrial membrane  | Ca ion homeostasis                                                     |
| 20                         | Mitochondrial-processing peptidase subunit alpha                        | PMPCA     | Q9DC61 | 1444    | 54712 | 5.85  | mitochondria            | peptidase, cleaves transit peptides from mito protein precursors       |
| 31                         | Mitogen-activated protein kinase 1                                      | MAPK1     | P63085 | -7.58   | 41249 | 6.50  | cytoplasm               | signaling kinase                                                       |
| 3                          | Moesin                                                                  | MSN       | P26041 | -2.82   | 67725 | 6.22  | cytoskeleton            | connections of cytoskeletal structures to plasma membrane              |
| 32,33                      | Multifunctional protein ADE2                                            | PAIC5     | Q8DCL9 | -3.50   | 47040 | 6.94  | cytoplasm               | purine biosynthesis                                                    |
| 57,58,59                   | Myosin light chain 3                                                    | MYL3      | P95443 | -9.25   | 12568 | 10.17 | mitochondria            | cardiac muscle contraction, regulatory light chain                     |
| 29                         | NAD kinase 2, mitochondrial                                             | NADK2     | Q8Q5H8 | -4.00   | 50827 | 8.31  | mitochondria            | phosphorylates NAD+ to NADP+                                           |
| 96                         | NAD(P)H dehydrogenase [quinone] 1                                       | NQO1      | Q64669 | -13.41  | 30940 | 8.74  | cytoplasm               | oxidoreductase                                                         |
| 27,29,31                   | NADH dehydrogenase [ubiquinone] 1 alpha subcomplex subunit 10           | NDUFA10   | Q99L3C | -3.30   | 40578 | 7.63  | mitochondria            | oxidative phosphorylation complex I                                    |
| 91,92                      | NADH dehydrogenase [ubiquinone] 1 alpha subcomplex subunit 11           | NDUFA11   | Q9D884 | 460.41  | 14972 | 8.63  | mitochondria            | oxidative phosphorylation complex I                                    |
| 94                         | NADH dehydrogenase [ubiquinone] 1 alpha subcomplex subunit 6            | NDUFA6    | Q9CQZ5 | -9.005  | 15273 | 10.10 | mitochondria            | oxidative phosphorylation complex I                                    |
| 94                         | NADH dehydrogenase [ubiquinone] 1 alpha subcomplex subunit 7            | NDUFA7    | Q921P6 | -9.25   | 12568 | 10.17 | mitochondria            | oxidative phosphorylation complex I                                    |
| 86                         | NADH dehydrogenase [ubiquinone] 1 beta subcomplex subunit 10            | NDUFB10   | Q9DC59 | 9.60    | 21010 | 8.19  | mitochondria            | oxidative phosphorylation complex I                                    |
| 85                         | NADH dehydrogenase [ubiquinone] 1 beta subcomplex subunit 9             | NDUFB9    | Q9CQ38 | 1386.3  | 21970 | 7.67  | mitochondria            | oxidative phosphorylation complex I                                    |
| 20,22,23                   | NADH dehydrogenase [ubiquinone] flavoprotein 1, mitochondrial           | NDUFV1    | Q91YT0 | 9.84    | 50802 | 8.51  | mitochondria            | oxidative phosphorylation complex I                                    |
| 97                         | NADH dehydrogenase [ubiquinone] flavoprotein 2, mitochondrial           | NDUFV2    | Q9D6J6 | -3.45   | 27268 | 7.00  | mitochondria            | oxidative phosphorylation complex I                                    |
| 28,33                      | NADH dehydrogenase [ubiquinone] iron-sulfur protein 2, mitochondrial    | NDUFS2    | Q91WDS | -4.81   | 46229 | 5.89  | mitochondria            | oxidative phosphorylation complex I                                    |
| 63,70                      | NADH dehydrogenase [ubiquinone] iron-sulfur protein 3, mitochondrial    | NDUFS3    | Q54722 | -4.21   | 43927 | 5.43  | mitochondria            | oxidative phosphorylation complex I                                    |
| 94                         | NADH dehydrogenase [ubiquinone] iron-sulfur protein 5                   | NDUFS5    | Q99LY9 | -9.005  | 12639 | 9.10  | mitochondria            | oxidative phosphorylation complex I                                    |
| 62                         | NADH dehydrogenase [ubiquinone] iron-sulfur protein 8, mitochondrial    | NDUFS8    | Q8K3J1 | -1.80   | 24023 | 5.89  | mitochondria            | oxidative phosphorylation complex I                                    |
| 11,12,13                   | NADP-dependent malic enzyme                                             | ME1       | P06801 | 5.10    | 63958 | 7.16  | cytoplasm               | oxidoreductase, malate metabolism to pyruvate                          |
| 55                         | Nitrilase homolog 2                                                     | NIT2      | Q8JHW2 | -2.03   | 30483 | 6.44  | cytoplasm               | omega-amidase activity (nitrogen metabolism)                           |
| 88,89                      | Nucleoside diphosphate kinase B                                         | NME2      | Q01768 | -2.10   | 17352 | 6.97  | cytoplasm               | nucleotide metabolism                                                  |
| 33                         | Ogg-like ATPase 1                                                       | OLA1      | Q9CZ30 | -5.29   | 44701 | 7.64  | cytoplasm               | ATP and GTP catabolism                                                 |
| 28,33                      | Ornithine aminotransferase                                              | OAT       | P29758 | -4.81   | 45790 | 5.73  | mitochondria            | proline biosynthesis                                                   |
| 9                          | Peptidase M20 domain-containing protein 2                               | PM20D2    | A3K559 | -2.14   | 46452 | 5.15  | unknown                 | hydrolase                                                              |
| 86                         | Peroxiredoxin-1                                                         | PRDX1     | P35700 | 9.60    | 22162 | 8.26  | cytoplasm               | oxidoreductase                                                         |
| 62                         | Peroxiredoxin-2                                                         | PRDX2     | Q61171 | -1.80   | 21765 | 5.20  | cytoplasm               | oxidoreductase                                                         |
| 89                         | Peroxiredoxin-5, mitochondrial                                          | PRDX5     | P98629 | -1.90   | 17014 | 7.70  | mitochondria            | oxidoreductase                                                         |
| 61,72,73,74,77,79          | Peroxiredoxin-6                                                         | PRDX6     | O8D709 | -4.30   | 24855 | 5.71  | cytoplasm               | oxidoreductase                                                         |
| 1,12,13,16                 | Phosphoglucomutase-1                                                    | PGM1      | Q9D0F9 | 12.31   | 61479 | 6.30  | cytoplasm               | carbohydrate, glucose metabolism (G1P to G6P)                          |
| 29,32,35,36                | Phosphoglycerate kinase 1                                               | PGK1      | P09411 | 1.67    | 44522 | 8.02  | cytoplasm               | glycolysis                                                             |
| 67,68,69                   | Phosphoglycerate mutase 1                                               | PGAM1     | Q9DBJ1 | -3.92   | 28814 | 6.67  | cytoplasm               | glycolysis                                                             |
| 96                         | Phosphoglycerate mutase 2                                               | PGAM2     | O70250 | -13.41  | 28809 | 8.65  | cytoplasm               | glycolysis                                                             |
| 39                         | Phosphoglycerate phosphatase                                            | PGP       | Q8CHP8 | -379.6  | 34519 | 5.21  | cytoplasm               | carbohydrate metabolism                                                |
| 70                         | Phosphomannomutase 2                                                    | PM22      | Q9Z2M7 | -4.62   | 27639 | 6.01  | cytoplasm               | mannose biosynthesis                                                   |
| 31                         | Phosphotriesterase-related protein                                      | PTER      | Q60866 | -7.58   | 39193 | 6.18  | cytoplasm               | hydrolase                                                              |
| 33                         | Poly(C)-binding protein 1                                               | PCBP1     | P60335 | -7.58   | 37474 | 6.66  | nucleus                 | nucleonucleoprotein, mRNA processing                                   |
| 8,10                       | Polymerase I and transcription release factor                           | PTRF1     | Q54722 | -4.21   | 43927 | 5.43  | mitochondria            | transcription regulation and termination                               |
| 1                          | Polyribonucleotide nucleotidyltransferase 1, mitochondrial              | PNP1      | Q8K1R3 | -2.19   | 80803 | 6.68  | mitochondria            | mRNA processing                                                        |
| 91,92,93                   | Profilin-1                                                              | PFN1      | P62962 | 270.24  | 14948 | 8.46  | cytoskeleton            | actin cytoskeleton organization                                        |
| 61,65,66                   | Prohibitin                                                              | PHB       | P67778 | -7.00   | 29802 | 5.57  | mitochondria            | inhibition of DNA synthesis                                            |
| 26                         | Prostaglandin reductase 2                                               | PTGR2     | Q8VDQ1 | -173.26 | 37991 | 5.27  | cytoplasm               | prostaglandin metabolism                                               |
| 65                         | Proteasome activator complex subunit 1                                  | PSME1     | P97371 | -915.43 | 28655 | 5.73  | proteasome              | protein degradation                                                    |
| 65                         | Proteasome subunit alpha type-2                                         | PSMA2     | P94922 | -5.29   | 25909 | 6.32  | proteasome              | protein degradation                                                    |
| 65,66                      | Proteasome subunit alpha type-3                                         | PSMA3     | O70435 | -5.35   | 28387 | 5.29  | proteasome              | protein degradation                                                    |
| 75,80                      | Proteasome subunit beta type-3                                          | PSMB3     | Q9R1P1 | -2.66   | 22949 | 6.15  | proteasome              | protein degradation                                                    |
| 64                         | Proteasome subunit beta type-7                                          | PSMB7     | P70195 | -3.67   | 25252 | 5.84  | proteasome              | protein degradation                                                    |
| 27                         | Protein ADP-ribosylarginine hydrolase-like protein 1                    | ADPRHL1   | Q8BGK2 | -1.82   | 39860 | 5.62  | unknown                 | hydrolase (protein de-ADP-ribosylation)                                |
| 9                          | Protein disulfide-isomerase A6                                          | PDI6      | Q5Z2R8 | -2.14   | 48070 | 5.00  | endoplasmic reticulum   | chaperone, rearranges protein disulfide bonds                          |
| 63,76                      | Protein DJ-1                                                            | PARK7     | P99LX0 | -2.90   | 20008 | 6.32  | cytoplasm, mitochondria | chaperone, hydrolase, protease                                         |
| 79,80                      | Protein-L-isoaspartate(D-aspartate) O-methyltransferase                 | PCMT1     | P23506 | -4.16   | 24619 | 7.10  | mitochondria            | repair and/or degradation of damaged proteins                          |
| 60                         | Putative ATP-dependent Clp protease proteolytic subunit, mitochondrial  | CLPP      | O88696 | -4.60   | 29781 | 7.05  | mitochondria            | catabolism of misfolded or incompletely synthesized proteins           |
| 28,33                      | Pyruvate dehydrogenase [lipoamide] kinase isozyme 1, mitochondrial      | PDK1      | Q8BFP9 | -4.81   | 46159 | 6.46  | mitochondria            | tricarboxylic acid cycle regulation                                    |
| 32                         | Pyruvate dehydrogenase [lipoamide] kinase isozyme 2, mitochondrial      | PDK2      | Q9JK42 | -3.01   | 46039 | 6.13  | mitochondria            | tricarboxylic acid cycle regulation                                    |
| 28,29,30,32,33,34          | Pyruvate dehydrogenase E1 component subunit alpha, somatic              | PDH1A     | P35486 | -2.56   | 40180 | 6.78  | mitochondria            | tricarboxylic acid cycle                                               |
| 27                         | Pyruvate dehydrogenase E1 component subunit beta, somatic               | PDH1B     | Q9D951 | -1.82   | 38912 | 6.41  | mitochondria            | tricarboxylic acid cycle                                               |
| 10                         | Pyruvate dehydrogenase protein X component                              | PDX       | Q8BK29 | -7.96   | 53965 | 7.63  | mitochondria            | tricarboxylic acid cycle                                               |
| 70                         | Regulator of microtubule dynamics protein 1                             | FAM82B    | Q9DCV4 | -4.62   | 34978 | 8.85  | cytoskeleton            | microtubule binding                                                    |
| 20,21                      | Retinal dehydrogenase 1                                                 | ALDH1A1   | P24549 | 1444    | 54433 | 7.92  | cytoplasm               | cofactor, retinol metabolism                                           |
| 58                         | Rho GDP-dissociation inhibitor 1                                        | ARHGDI1   | Q99PT1 | -4.10   | 23303 | 5.12  | cytoplasm               | GTPase activation, Rho signal transduction                             |
| 71                         | Ribosylhydronicotinamide dehydrogenase [quinone]                        | NQO2      | Q9J175 | -2.70   | 26231 | 6.54  | cytoplasm               | oxidoreductase                                                         |
| 19,20,21                   | Sarcoplumenin (NOTE: carboxy-terminal fragment only)                    | SRL       | Q7TQ48 | -259.9  | 99123 | 4.39  | sarcoplasmic reticulum  | regulation of calcium transport                                        |
| 20                         | Selenium-binding protein 1                                              | SELENBP1  | P17563 | 1444    | 52480 | 5.87  | nucleus, cytoplasm      | Se-binding, intra-Golgi protein transport                              |
| 59,61,71                   | Septaplerin reductase                                                   | SPR       | Q64105 | -3.80   | 27865 | 5.58  | cytoplasm               | tetrahydrobiopterin biosynthesis                                       |
| 33                         | S-formylglutathione hydrolase                                           | ESD       | Q8R0P3 | -2.44   | 31299 | 6.70  | cytoplasm               | formaldehyde catabolism                                                |
| 30,31                      | Short-chain specific acyl-CoA dehydrogenase 3                           | ACADS     | O07417 | -3.89   | 42231 | 7.12  | mitochondria            | fatty acid beta-oxidation                                              |
| 31                         | Sorbitol dehydrogenase                                                  | SORD      | Q64442 | -7.58   | 38225 | 6.56  | mitochondria            | fructose biosynthesis                                                  |
| 20,21                      | Sorting and assembly machinery component 50 homolog                     | SAMM50    | Q8BGH2 | 1444    | 51831 | 6.34  | mitochondria            | protein import into mitochondrial outer membrane                       |
| 14                         | Succinate dehydrogenase [ubiquinone] flavoprotein subunit               | SDHA      | Q8K2B3 | 14.68   | 72539 | 7.06  | mitochondria            | tricarboxylic acid cycle                                               |
| 96                         | Succinate dehydrogenase [ubiquinone] iron-sulfur subunit, mitochondrial | SDHB      | Q9CQA3 | -13.46  | 31793 | 6.96  | mitochondria            | tricarboxylic acid cycle                                               |
| 18                         | Succinate-semialdehyde dehydrogenase                                    | ALDH5A1   | O8BWF0 | -7.34   | 52011 | 7.12  | mitochondria            | oxidoreductase                                                         |
| 29                         | Succinyl-CoA ligase [ADP-forming] subunit beta                          | SUCLA2    | Q9Z219 | -3.98   | 50082 | 6.57  | mitochondria            | tricarboxylic acid cycle                                               |
| 18,19                      | Succinyl-CoA:3-ketoacid-coenzyme A transferase 1,                       | OXCT1     | Q9D0K2 | 2.62    | 51876 | 7.01  | mitochondria            | ketone catabolism                                                      |
| 86                         | Superoxide dismutase [Mn], mitochondrial                                | SOD2      | P09671 | 9.60    | 22222 | 7.30  | mitochondria            | oxidoreductase                                                         |
| 19                         | T-complex protein 1 subunit beta                                        | CTC2      | Q90314 | 2.82    | 57441 | 5.97  | cytoplasm               | chaperone, assists protein folding upon ATP hydrolysis                 |
| 11                         | T-complex protein 1 subunit epsilon                                     | CTC5      | P80316 | 2.45    | 59586 | 5.72  | cytoplasm               | chaperone, assists protein folding upon ATP hydrolysis                 |
| 16                         | T-complex protein 1 subunit gamma                                       | CTC3      | P80318 | 14.84   | 60591 | 6.28  | cytoplasm               | chaperone, assists protein folding upon ATP hydrolysis                 |
| 59                         | Thiamin pyrophosphokinase 1                                             | TPK1      | Q9R0M5 | -2.47   | 27051 | 5.44  | cytoplasm, mitochondria | thiamine metabolism                                                    |
| 97                         | Thioredoxin-dependent peroxide reductase, mitochondrial                 | PRDX3     | P20108 | -3.45   | 21564 | 5.73  | mitochondria            | oxidoreductase                                                         |
| 39                         | Thioredoxin-like protein 1                                              | TNL1      | Q8CDN6 | -3.80   | 32217 | 4.84  | cytoplasm               | oxidoreductase                                                         |
| 14                         | Transketolase                                                           | TKT       | P10142 | 14.68   | 67589 | 7.23  | cytoplasm               | pentose phosphate metabolism                                           |
| 65,66                      | Translational activator of cytochrome c oxidase 1                       | TACO1     | Q8K0Z7 | -5.35   | 32293 | 8.35  | mitochondria            | translation regulation                                                 |
| 6,7                        | Trifunctional enzyme subunit alpha                                      | HADHA     | Q8BMS1 | 2.42    | 78765 | 9.06  | mitochondria            | fatty acid beta-oxidation                                              |
| 36                         | Trifunctional enzyme subunit beta, mitochondrial                        | HADHB     | Q99JY0 | -3.38   | 47578 | 9.24  | mitochondria            | fatty acid beta-oxidation                                              |
| 59,61,71,72,73,74,77,78,82 | Triosephosphate isomerase                                               | TFPI      | P17751 | -3.80   | 26696 | 6.90  | cytoplasm               | glycolysis                                                             |
| 18,19,20,21,22             | Tripartite motif-containing protein 72                                  | TRIM72    | Q1X1H7 | 5.22    | 52783 | 6.01  | membrane                | exocytosis, transport, nucleation of protein membrane repair machinery |
| 39                         | Tropomyosin alpha-1 chain                                               | TPM1      | P58771 | -3.80   | 32661 | 4.69  | contractile apparatus   | Ca-dependent regulation of striated muscle contraction                 |
| 50                         | Tropomyosin alpha-4 chain                                               | TPM4      | Q6R1R2 | -3.45   | 28450 | 4.65  | contractile apparatus   | Ca-dependent regulation of striated muscle contraction                 |
| 65,66,96                   | Troponin I, cardiac muscle                                              | TNNI3     | P48787 | -9.50   | 24244 | 9.57  | contractile apparatus   | confers Ca-sensitivity to striated muscle actomyosin ATPase activity   |
| 30                         | Troponin T, cardiac muscle                                              | TNNT2     | P50752 | -2.72   | 35804 | 4.98  | contractile apparatus   | confers Ca-sensitivity to striated muscle actomyosin ATPase activity   |
| 8                          | Tubulin alpha-1B chain                                                  | TUBA1B    | P05213 | -3.57   | 50120 | 4.94  | cytoskeleton            | major microtubule constituent, GTP binding                             |
| 10                         | Tubulin alpha-4A chain                                                  | TUB4A     | P68368 | -7.95   | 49892 | 4.95  | cytoskeleton            | major microtubule constituent, GTP binding                             |
| 8,10                       | Tubulin beta-2C chain                                                   | TUBB2C    | P68372 | -4.21   | 49799 | 4.79  | cytoskeleton            | major microtubule constituent, GTP binding                             |
| 55                         | Ubiquinone biosynthesis methyltransferase COQ5, mitochondrial           | COQ5      | Q9CX10 | -2.03   | 31700 | 5.53  | mitochondria            | ubiquinone biosynthesis                                                |
| 87                         | Ubiquinone biosynthesis protein COQ7 homolog                            | COQ7      | P97478 | -19.12  | 20495 | 5.64  | mitochondria            | ubiquinone biosynthesis                                                |
| 51                         | Ubiquinone biosynthesis protein COQ9, mitochondrial                     | COQ9      | Q8K1Z0 | -2.20   | 35061 | 5.60  | mitochondria            | ubiquinone biosynthesis                                                |
| 58                         | Ubiquitin carboxyl-terminal hydrolase isozyme L1                        | UCHL1     | Q8R0P9 | -4.07   | 24822 | 5.14  | cytoplasm               | ubiquitination pathway                                                 |
| 57                         | Ubiquitin carboxyl-terminal hydrolase isozyme L3                        | UCHL3     | Q90K81 | -2.18   | 26135 | 4.96  | cytoplasm               | ubiquitination pathway                                                 |
| 63                         | Ubiquitin-conjugating enzyme E2 K                                       | UBE2K     | P61087 | -4.70   | 22393 | 5.33  | cytoplasm               | ubiquitination pathway                                                 |
| 71                         | UPF0568 protein C14orf166 homolog                                       | C14ORF166 | Q9QC08 | -2.70   | 28135 | 6.40  | nucleus                 | transcription regulation                                               |
| 19,21,22                   | UTP-glucose-1-phosphate uridylyltransferase                             | UGP2      | Q91ZJ5 | 4.18    | 56944 | 7.18  | cytoplasm               | metabolism, glucosyl donor                                             |
| 84                         | Vacuolar protein sorting-associated protein 29                          | VPS29     | Q8QZ88 | -6.11   | 20483 | 6.29  | cytoplasm               | protein transport, endosome to trans-Golgi network                     |
| 12,13,14,15,16             | Very long-chain specific acyl-CoA dehydrogenase, mitochondrial          | ACADVL    | P50544 | 21.24   | 86337 | 7.72  | mitochondria            | fatty acid beta-oxidation                                              |
| 49                         | Voltage-dependent anion-selective channel protein 1                     | VDAC1     | Q60932 | 1.70    | 30737 | 8.62  | membrane                | ion transport, outer mitochondrial and plasma membrane                 |
| 53                         | Voltage-dependent anion-selective channel protein 2                     | VDAC2     | Q60930 | -2.44   | 31713 | 7.44  | mitochondria            | ion transport, outer mitochondrial membrane                            |
| 14                         | WD repeat-containing protein 1                                          | WDR1      | O88342 | 14.68   | 66365 | 6.11  | cytoskeleton            | disassembly of actin filaments                                         |
| 10                         | Xaa-Pro dipeptidase                                                     | PEPD      | Q11136 | -8.00   | 54993 | 5.50  | cytoplasm               | collagen degradation                                                   |
| 31                         | Zinc-binding alcohol dehydrogenase domain-containing protein 2          | ZADH2     | Q8BGC4 | -7.60   | 40503 | 7.01  | peroxisome              | oxidoreductase                                                         |
| 9                          | Alpha-2-HS-glycoprotein                                                 | AHS2      | P28699 | -3.57   | 37302 | 6.04  | secreted                | endocytosis, Ca-phosphate transport                                    |
| 39                         | Annexin A5                                                              | AN        |        |         |       |       |                         |                                                                        |
